# Supplementary material
Source: publisher figshare collection journal article supplement (https://acs.figshare.com/ndownloader/files/3604410)
Supplement: Supplementary file 1 [file 3604410]

 
data_BARAN355 
  
_audit_creation_method            SHELXL-2013 
_chemical_name_systematic 
; 
 ? 
; 
_chemical_name_common             CBMG 
_chemical_melting_point           ? 
_chemical_formula_moiety          ? 
_chemical_formula_sum 
 'C5 H8 Cl N3 O4' 
_chemical_formula_weight          209.60
  
loop_ 
 _atom_type_symbol 
 _atom_type_description 
 _atom_type_scat_dispersion_real 
 _atom_type_scat_dispersion_imag 
 _atom_type_scat_source 
 'C'  'C'   0.0033   0.0016 
 'International Tables Vol C Tables 4.2.6.8 and 6.1.1.4' 
 'H'  'H'   0.0000   0.0000 
 'International Tables Vol C Tables 4.2.6.8 and 6.1.1.4' 
 'N'  'N'   0.0061   0.0033 
 'International Tables Vol C Tables 4.2.6.8 and 6.1.1.4' 
 'O'  'O'   0.0106   0.0060 
 'International Tables Vol C Tables 4.2.6.8 and 6.1.1.4' 
 'Cl'  'Cl'   0.1484   0.1585 
 'International Tables Vol C Tables 4.2.6.8 and 6.1.1.4' 
  
_space_group_crystal_system       triclinic 
_space_group_IT_number            2 
_space_group_name_H-M_alt         'P -1' 
_space_group_name_Hall            '-P 1' 
  
_shelx_space_group_comment 
; 
The symmetry employed for this shelxl refinement is uniquely defined 
by the following loop, which should always be used as a source of 
symmetry information in preference to the above space-group names. 
They are only intended as comments. 
; 
  
loop_ 
 _space_group_symop_operation_xyz 
 'x, y, z' 
 '-x, -y, -z' 
  
_cell_length_a                    8.8504(11) 
_cell_length_b                    10.2991(11) 
_cell_length_c                    10.5406(13) 
_cell_angle_alpha                 76.153(5) 
_cell_angle_beta                  72.220(5) 
_cell_angle_gamma                 88.192(5) 
_cell_volume                      887.41(18) 
_cell_formula_units_Z             4 
_cell_measurement_temperature     100(2) 
_cell_measurement_reflns_used     6717 
_cell_measurement_theta_min       2.54 
_cell_measurement_theta_max       26.35 
  
_exptl_crystal_description        plate 
_exptl_crystal_colour             colourless 
_exptl_crystal_density_meas       ? 
_exptl_crystal_density_method     ? 
_exptl_crystal_density_diffrn     1.569 
_exptl_crystal_F_000              432 
_exptl_transmission_factor_min    ? 
_exptl_transmission_factor_max    ? 
_exptl_crystal_size_max           0.280 
_exptl_crystal_size_mid           0.240 
_exptl_crystal_size_min           0.200 
_exptl_absorpt_coefficient_mu     0.419 
_shelx_estimated_absorpt_T_min    0.892 
_shelx_estimated_absorpt_T_max    0.921 
_exptl_absorpt_correction_type    multi-scan 
_exptl_absorpt_correction_T_min   0.919 
_exptl_absorpt_correction_T_max   0.944 
_exptl_absorpt_process_details    SADABS 
  
_exptl_special_details 
; 
 ? 
; 
  
_diffrn_ambient_temperature       100(2) 
_diffrn_radiation_wavelength      0.71073 
_diffrn_radiation_type            MoK\a 
_diffrn_source                    ? 
_diffrn_measurement_device_type   'Bruker APEX-II CCD' 
_diffrn_measurement_method        '\f and \w scans' 
_diffrn_detector_area_resol_mean  ? 
_diffrn_reflns_number             12099 
_diffrn_reflns_av_unetI/netI      0.0255 
_diffrn_reflns_av_R_equivalents   0.0283 
_diffrn_reflns_limit_h_min        -9 
_diffrn_reflns_limit_h_max        11 
_diffrn_reflns_limit_k_min        -12 
_diffrn_reflns_limit_k_max        12 
_diffrn_reflns_limit_l_min        -13 
_diffrn_reflns_limit_l_max        12 
_diffrn_reflns_theta_min          2.039 
_diffrn_reflns_theta_max          26.368 
_diffrn_reflns_theta_full         25.000 
_diffrn_measured_fraction_theta_max   0.994 
_diffrn_measured_fraction_theta_full  0.996 
_diffrn_reflns_Laue_measured_fraction_max    0.994 
_diffrn_reflns_Laue_measured_fraction_full   0.996 
_diffrn_reflns_point_group_measured_fraction_max   0.994 
_diffrn_reflns_point_group_measured_fraction_full  0.996 
_reflns_number_total              3599 
_reflns_number_gt                 3208 
_reflns_threshold_expression      'I > 2\s(I)' 
_reflns_Friedel_coverage          0.000 
_reflns_Friedel_fraction_max      . 
_reflns_Friedel_fraction_full     . 
  
_reflns_special_details 
; 
 Reflections were merged by SHELXL according to the crystal 
 class for the calculation of statistics and refinement. 
  
 _reflns_Friedel_fraction is defined as the number of unique 
 Friedel pairs measured divided by the number that would be 
 possible theoretically, ignoring centric projections and 
 systematic absences. 
; 
  
_computing_data_collection        'Bruker APEX2' 
_computing_cell_refinement        'Bruker SAINT' 
_computing_data_reduction         'Bruker SAINT' 
_computing_structure_solution     'SHELXS-97 (Sheldrick 2008)' 
_computing_structure_refinement   'SHELXL-2013 (Sheldrick, 2013)' 
_computing_molecular_graphics     'Bruker SHELXTL' 
_computing_publication_material   'Bruker SHELXTL' 
  
_refine_special_details 
; 
 ? 
; 
_refine_ls_structure_factor_coef  Fsqd 
_refine_ls_matrix_type            full 
_refine_ls_weighting_scheme       calc 
_refine_ls_weighting_details 
'w=1/[\s^2^(Fo^2^)+(0.0350P)^2^+0.6200P] where P=(Fo^2^+2Fc^2^)/3' 
_atom_sites_solution_primary      ? 
_atom_sites_solution_secondary    ? 
_atom_sites_solution_hydrogens    geom 
_refine_ls_hydrogen_treatment     constr 
_refine_ls_extinction_method      none 
_refine_ls_extinction_coef        . 
_refine_ls_number_reflns          3599 
_refine_ls_number_parameters      229 
_refine_ls_number_restraints      0 
_refine_ls_R_factor_all           0.0349 
_refine_ls_R_factor_gt            0.0303 
_refine_ls_wR_factor_ref          0.0786 
_refine_ls_wR_factor_gt           0.0756 
_refine_ls_goodness_of_fit_ref    1.020 
_refine_ls_restrained_S_all       1.020 
_refine_ls_shift/su_max           0.012 
_refine_ls_shift/su_mean          0.001 
  
loop_ 
 _atom_site_label 
 _atom_site_type_symbol 
 _atom_site_fract_x 
 _atom_site_fract_y 
 _atom_site_fract_z 
 _atom_site_U_iso_or_equiv 
 _atom_site_adp_type 
 _atom_site_occupancy 
 _atom_site_site_symmetry_order 
 _atom_site_calc_flag 
 _atom_site_refinement_flags_posn 
 _atom_site_refinement_flags_adp 
 _atom_site_refinement_flags_occupancy 
 _atom_site_disorder_assembly 
 _atom_site_disorder_group 
Cl1 Cl 0.10664(5) 1.09904(4) 0.52766(4) 0.02250(11) Uani 1 1 d . . . . . 
Cl1' Cl 0.99656(5) 0.86238(4) 0.87287(4) 0.01860(11) Uani 1 1 d . . . . . 
O1 O 0.53140(13) 1.11830(11) 0.87045(11) 0.0157(2) Uani 1 1 d . . . . . 
O1' O 0.84170(13) 0.50217(11) 1.43921(10) 0.0167(2) Uani 1 1 d . . . . . 
O2 O 0.61916(13) 1.05760(11) 0.66872(11) 0.0164(2) Uani 1 1 d . . . . . 
O2' O 0.89946(13) 0.41439(10) 1.25347(11) 0.0167(2) Uani 1 1 d . . . . . 
O3 O 0.40822(13) 0.80681(11) 0.80190(11) 0.0179(2) Uani 1 1 d . . . . . 
O3' O 1.22808(13) 0.53549(11) 1.17577(12) 0.0193(2) Uani 1 1 d . . . . . 
O4 O 0.46704(13) 0.76367(10) 0.59190(11) 0.0167(2) Uani 1 1 d . . . . . 
O4' O 1.25958(13) 0.45782(11) 0.98678(11) 0.0172(2) Uani 1 1 d . . . . . 
N1 N 0.35406(15) 1.08614(12) 0.77081(13) 0.0135(3) Uiso 1 1 d . . . . . 
H1D H 0.2878 1.1050 0.8421 0.016 Uiso 1 1 calc R U . . . 
N1' N 0.92054(15) 0.64172(13) 1.23599(13) 0.0143(3) Uiso 1 1 d . . . . . 
H1'D H 0.9041 0.7002 1.2844 0.017 Uiso 1 1 calc R U . . . 
N3 N 0.34556(15) 0.94923(12) 0.61976(13) 0.0124(3) Uani 1 1 d . . . . . 
H3A H 0.3373 0.9504 0.5403 0.015 Uiso 1 1 calc R U . . . 
N2' N 0.91093(15) 0.79457(12) 1.04647(13) 0.0140(3) Uani 1 1 d . . . . . 
N2 N 0.19656(15) 1.14347(13) 0.63589(13) 0.0144(3) Uani 1 1 d . . . . . 
N3' N 1.09200(15) 0.61941(12) 1.02020(13) 0.0127(3) Uani 1 1 d . . . . . 
H3'A H 1.1001 0.6287 0.9351 0.015 Uiso 1 1 calc R U . . . 
C1 C 0.69277(19) 1.11470(16) 0.87781(17) 0.0183(3) Uani 1 1 d . . . . . 
H1A H 0.6941 1.1370 0.9609 0.027 Uiso 1 1 calc R U . . . 
H1B H 0.7598 1.1782 0.8002 0.027 Uiso 1 1 calc R U . . . 
H1C H 0.7311 1.0265 0.8773 0.027 Uiso 1 1 calc R U . . . 
C1' C 0.8071(2) 0.36815(16) 1.52828(16) 0.0205(3) Uani 1 1 d . . . . . 
H1'A H 0.7774 0.3734 1.6224 0.031 Uiso 1 1 calc R U . . . 
H1'B H 0.8998 0.3163 1.5088 0.031 Uiso 1 1 calc R U . . . 
H1'C H 0.7214 0.3262 1.5125 0.031 Uiso 1 1 calc R U . . . 
C2 C 0.51312(18) 1.08426(14) 0.76108(15) 0.0130(3) Uani 1 1 d . . . . . 
C2' C 0.88906(18) 0.50909(15) 1.30458(15) 0.0136(3) Uani 1 1 d . . . . . 
C3 C 0.29579(17) 1.05914(15) 0.67148(15) 0.0126(3) Uani 1 1 d . . . . . 
C3' C 0.97674(17) 0.68773(14) 1.09457(15) 0.0122(3) Uani 1 1 d . . . . . 
C4 C 0.40823(17) 0.83606(15) 0.68455(15) 0.0131(3) Uani 1 1 d . . . . . 
C4' C 1.19686(18) 0.53610(15) 1.07256(15) 0.0132(3) Uani 1 1 d . . . . . 
C5 C 0.5324(2) 0.63870(16) 0.64351(18) 0.0227(4) Uani 1 1 d . . . . . 
H5A H 0.5649 0.5903 0.5730 0.034 Uiso 1 1 calc R U . . . 
H5B H 0.4531 0.5860 0.7216 0.034 Uiso 1 1 calc R U . . . 
H5C H 0.6225 0.6569 0.6702 0.034 Uiso 1 1 calc R U . . . 
C5' C 1.3616(2) 0.35672(17) 1.03405(19) 0.0228(4) Uani 1 1 d . . . . . 
H5'A H 1.4104 0.3114 0.9630 0.034 Uiso 1 1 calc R U . . . 
H5'B H 1.2993 0.2932 1.1144 0.034 Uiso 1 1 calc R U . . . 
H5'C H 1.4425 0.3988 1.0560 0.034 Uiso 1 1 calc R U . . . 
  
loop_ 
 _atom_site_aniso_label 
 _atom_site_aniso_U_11 
 _atom_site_aniso_U_22 
 _atom_site_aniso_U_33 
 _atom_site_aniso_U_23 
 _atom_site_aniso_U_13 
 _atom_site_aniso_U_12 
Cl1 0.0259(2) 0.0258(2) 0.0279(2) -0.01547(17) -0.01980(18) 0.01276(17) 
Cl1' 0.0179(2) 0.01801(19) 0.01392(19) 0.00155(14) -0.00084(15) 0.00446(15) 
O1 0.0157(6) 0.0207(6) 0.0148(5) -0.0088(4) -0.0076(4) 0.0047(4) 
O1' 0.0253(6) 0.0147(5) 0.0091(5) -0.0025(4) -0.0043(4) 0.0036(4) 
O2 0.0138(5) 0.0226(6) 0.0136(5) -0.0064(4) -0.0042(4) 0.0034(4) 
O2' 0.0227(6) 0.0147(5) 0.0132(5) -0.0051(4) -0.0051(5) 0.0025(4) 
O3 0.0219(6) 0.0188(6) 0.0132(6) -0.0039(4) -0.0064(5) 0.0071(5) 
O3' 0.0196(6) 0.0234(6) 0.0195(6) -0.0091(5) -0.0103(5) 0.0068(5) 
O4 0.0208(6) 0.0155(5) 0.0144(5) -0.0060(4) -0.0049(5) 0.0077(4) 
O4' 0.0170(6) 0.0183(5) 0.0207(6) -0.0106(5) -0.0086(5) 0.0090(4) 
N3 0.0141(6) 0.0140(6) 0.0106(6) -0.0040(5) -0.0052(5) 0.0026(5) 
N2' 0.0139(6) 0.0141(6) 0.0113(6) -0.0018(5) -0.0011(5) 0.0015(5) 
N2 0.0153(7) 0.0165(6) 0.0152(6) -0.0069(5) -0.0082(5) 0.0034(5) 
N3' 0.0133(6) 0.0146(6) 0.0101(6) -0.0038(5) -0.0032(5) 0.0035(5) 
C1 0.0173(8) 0.0225(8) 0.0182(8) -0.0050(6) -0.0100(7) 0.0013(6) 
C1' 0.0319(9) 0.0156(8) 0.0127(8) -0.0006(6) -0.0075(7) 0.0018(7) 
C2 0.0162(8) 0.0103(7) 0.0126(7) -0.0019(6) -0.0057(6) 0.0024(6) 
C2' 0.0116(7) 0.0173(7) 0.0127(7) -0.0043(6) -0.0046(6) 0.0042(6) 
C3 0.0109(7) 0.0138(7) 0.0105(7) -0.0019(6) -0.0005(6) -0.0007(6) 
C3' 0.0118(7) 0.0129(7) 0.0133(7) -0.0051(6) -0.0040(6) 0.0002(6) 
C4 0.0102(7) 0.0149(7) 0.0136(7) -0.0038(6) -0.0022(6) 0.0005(6) 
C4' 0.0108(7) 0.0134(7) 0.0149(7) -0.0046(6) -0.0025(6) 0.0005(6) 
C5 0.0289(9) 0.0173(8) 0.0221(9) -0.0065(7) -0.0078(7) 0.0112(7) 
C5' 0.0211(9) 0.0193(8) 0.0350(10) -0.0127(7) -0.0151(8) 0.0115(7) 
  
_geom_special_details 
; 
 All esds (except the esd in the dihedral angle between two l.s. planes) 
 are estimated using the full covariance matrix.  The cell esds are taken 
 into account individually in the estimation of esds in distances, angles 
 and torsion angles; correlations between esds in cell parameters are only 
 used when they are defined by crystal symmetry.  An approximate (isotropic) 
 treatment of cell esds is used for estimating esds involving l.s. planes. 
; 
  
loop_ 
 _geom_bond_atom_site_label_1 
 _geom_bond_atom_site_label_2 
 _geom_bond_distance 
 _geom_bond_site_symmetry_2 
 _geom_bond_publ_flag 
Cl1 N2 1.7238(13) . ? 
Cl1' N2' 1.7278(13) . ? 
O1 C2 1.3375(18) . ? 
O1 C1 1.4526(19) . ? 
O1' C2' 1.3359(18) . ? 
O1' C1' 1.4530(18) . ? 
O2 C2 1.2073(18) . ? 
O2' C2' 1.2106(18) . ? 
O3 C4 1.2010(18) . ? 
O3' C4' 1.2001(18) . ? 
O4 C4 1.3395(18) . ? 
O4 C5 1.4481(18) . ? 
O4' C4' 1.3379(18) . ? 
O4' C5' 1.4543(18) . ? 
N1 C2 1.380(2) . ? 
N1 C3 1.3848(19) . ? 
N1' C2' 1.376(2) . ? 
N1' C3' 1.385(2) . ? 
N3 C3 1.3747(19) . ? 
N3 C4 1.3935(19) . ? 
N2' C3' 1.2962(19) . ? 
N2 C3 1.290(2) . ? 
N3' C3' 1.3714(19) . ? 
N3' C4' 1.3921(19) . ? 
  
loop_ 
 _geom_angle_atom_site_label_1 
 _geom_angle_atom_site_label_2 
 _geom_angle_atom_site_label_3 
 _geom_angle 
 _geom_angle_site_symmetry_1 
 _geom_angle_site_symmetry_3 
 _geom_angle_publ_flag 
C2 O1 C1 115.16(12) . . ? 
C2' O1' C1' 115.65(12) . . ? 
C4 O4 C5 114.76(12) . . ? 
C4' O4' C5' 114.71(12) . . ? 
C2 N1 C3 123.24(13) . . ? 
C2' N1' C3' 124.63(13) . . ? 
C3 N3 C4 125.85(13) . . ? 
C3' N2' Cl1' 113.97(11) . . ? 
C3 N2 Cl1 114.48(11) . . ? 
C3' N3' C4' 124.72(13) . . ? 
O2 C2 O1 125.29(14) . . ? 
O2 C2 N1 125.91(14) . . ? 
O1 C2 N1 108.80(13) . . ? 
O2' C2' O1' 125.28(14) . . ? 
O2' C2' N1' 126.68(14) . . ? 
O1' C2' N1' 108.04(13) . . ? 
N2 C3 N3 125.84(14) . . ? 
N2 C3 N1 114.65(13) . . ? 
N3 C3 N1 119.52(13) . . ? 
N2' C3' N3' 126.70(14) . . ? 
N2' C3' N1' 114.14(13) . . ? 
N3' C3' N1' 119.17(13) . . ? 
O3 C4 O4 125.85(14) . . ? 
O3 C4 N3 126.94(14) . . ? 
O4 C4 N3 107.21(12) . . ? 
O3' C4' O4' 125.52(14) . . ? 
O3' C4' N3' 126.14(14) . . ? 
O4' C4' N3' 108.33(12) . . ? 
  
_refine_diff_density_max    0.514 
_refine_diff_density_min   -0.336 
_refine_diff_density_rms    0.054 
  
_shelxl_version_number 2013-3 
  
_shelx_res_file 
; 
TITL BARAN355 in P-1 
CELL 0.71073 8.8504 10.2991 10.5406 76.153 72.220 88.192 
ZERR 2.00 0.0011 0.0011 0.0013 0.005 0.005 0.005 
LATT 1 
SFAC C H N O CL 
UNIT 20 32 12 16 4 
TEMP 0.000 
SIZE 0.200 0.240 0.280 
ACTA 50 
omit -3 3 2 
L.S. 4 
FMAP 2 
PLAN 5 
BOND 
WGHT    0.035000    0.620000 
FVAR       0.19106 
CL1   5    0.106639    1.099044    0.527660    11.00000    0.02586    0.02578 = 
         0.02790   -0.01547   -0.01980    0.01276 
CL1'  5    0.996559    0.862380    0.872871    11.00000    0.01792    0.01801 = 
         0.01392    0.00155   -0.00084    0.00446 
O1    4    0.531401    1.118298    0.870445    11.00000    0.01573    0.02073 = 
         0.01477   -0.00883   -0.00756    0.00466 
O1'   4    0.841701    0.502169    1.439213    11.00000    0.02526    0.01470 = 
         0.00914   -0.00254   -0.00428    0.00356 
O2    4    0.619164    1.057604    0.668720    11.00000    0.01383    0.02262 = 
         0.01363   -0.00636   -0.00422    0.00340 
O2'   4    0.899464    0.414389    1.253474    11.00000    0.02269    0.01468 = 
         0.01320   -0.00514   -0.00508    0.00247 
O3    4    0.408219    0.806806    0.801903    11.00000    0.02187    0.01884 = 
         0.01317   -0.00390   -0.00637    0.00709 
O3'   4    1.228076    0.535487    1.175771    11.00000    0.01958    0.02343 = 
         0.01946   -0.00913   -0.01030    0.00677 
O4    4    0.467042    0.763675    0.591895    11.00000    0.02082    0.01546 = 
         0.01438   -0.00603   -0.00493    0.00770 
O4'   4    1.259579    0.457821    0.986777    11.00000    0.01702    0.01830 = 
         0.02074   -0.01061   -0.00859    0.00897 
N1    3    0.354060    1.086142    0.770810    11.00000    0.01354 
AFIX  43 
H1D   2    0.287829    1.105018    0.842086    11.00000   -1.20000 
AFIX   0 
N1'   3    0.920536    0.641719    1.235989    11.00000    0.01429 
AFIX  43 
H1'D  2    0.904141    0.700154    1.284376    11.00000   -1.20000 
AFIX   0 
N3    3    0.345559    0.949227    0.619763    11.00000    0.01411    0.01399 = 
         0.01059   -0.00402   -0.00515    0.00258 
AFIX  43 
H3A   2    0.337276    0.950412    0.540301    11.00000   -1.20000 
AFIX   0 
N2'   3    0.910929    0.794572    1.046473    11.00000    0.01387    0.01415 = 
         0.01130   -0.00177   -0.00105    0.00150 
N2    3    0.196564    1.143467    0.635892    11.00000    0.01532    0.01653 = 
         0.01519   -0.00687   -0.00821    0.00336 
N3'   3    1.092001    0.619407    1.020195    11.00000    0.01330    0.01461 = 
         0.01014   -0.00382   -0.00325    0.00353 
AFIX  43 
H3'A  2    1.100087    0.628697    0.935064    11.00000   -1.20000 
AFIX   0 
C1    1    0.692770    1.114704    0.877814    11.00000    0.01728    0.02246 = 
         0.01821   -0.00502   -0.00998    0.00133 
AFIX 137 
H1A   2    0.694071    1.136974    0.960869    11.00000   -1.50000 
H1B   2    0.759804    1.178235    0.800165    11.00000   -1.50000 
H1C   2    0.731079    1.026525    0.877277    11.00000   -1.50000 
AFIX   0 
C1'   1    0.807142    0.368146    1.528278    11.00000    0.03192    0.01563 = 
         0.01270   -0.00056   -0.00754    0.00182 
AFIX 137 
H1'A  2    0.777373    0.373360    1.622403    11.00000   -1.50000 
H1'B  2    0.899785    0.316301    1.508786    11.00000   -1.50000 
H1'C  2    0.721436    0.326227    1.512490    11.00000   -1.50000 
AFIX   0 
C2    1    0.513121    1.084262    0.761075    11.00000    0.01615    0.01035 = 
         0.01265   -0.00187   -0.00569    0.00238 
C2'   1    0.889058    0.509093    1.304582    11.00000    0.01157    0.01732 = 
         0.01268   -0.00433   -0.00463    0.00419 
C3    1    0.295791    1.059136    0.671478    11.00000    0.01087    0.01384 = 
         0.01052   -0.00186   -0.00051   -0.00065 
C3'   1    0.976741    0.687727    1.094570    11.00000    0.01175    0.01289 = 
         0.01329   -0.00509   -0.00404    0.00020 
C4    1    0.408227    0.836064    0.684552    11.00000    0.01020    0.01486 = 
         0.01357   -0.00380   -0.00219    0.00052 
C4'   1    1.196855    0.536102    1.072558    11.00000    0.01077    0.01345 = 
         0.01491   -0.00458   -0.00252    0.00049 
C5    1    0.532372    0.638702    0.643510    11.00000    0.02888    0.01731 = 
         0.02206   -0.00649   -0.00776    0.01123 
AFIX 137 
H5A   2    0.564874    0.590298    0.572985    11.00000   -1.50000 
H5B   2    0.453086    0.586032    0.721587    11.00000   -1.50000 
H5C   2    0.622468    0.656925    0.670174    11.00000   -1.50000 
AFIX   0 
C5'   1    1.361614    0.356724    1.034046    11.00000    0.02114    0.01926 = 
         0.03501   -0.01270   -0.01506    0.01153 
AFIX 137 
H5'A  2    1.410425    0.311444    0.963012    11.00000   -1.50000 
H5'B  2    1.299315    0.293180    1.114370    11.00000   -1.50000 
H5'C  2    1.442456    0.398814    1.055958    11.00000   -1.50000 
  
AFIX   0 
HKLF 4 1 1 0 0 0 1 0 0 0 1 
  
REM  BARAN355 in P-1 
REM R1 =  0.0303 for    3208 Fo > 4sig(Fo)  and  0.0349 for all    3599 data 
REM    229 parameters refined using      0 restraints 
  
END 
  
WGHT      0.0332      0.5854 
  
REM Highest difference peak  0.514,  deepest hole -0.336,  1-sigma level  0.054 
Q1    1   0.9739  0.6566  1.2342  11.00000  0.05    0.51 
Q2    1   0.8598  0.6157  1.2420  11.00000  0.05    0.46 
Q3    1   0.0653  1.1600  0.6102  11.00000  0.05    0.38 
Q4    1   0.3357  1.0401  0.7958  11.00000  0.05    0.37 
Q5    1   0.3965  1.1339  0.7406  11.00000  0.05    0.34 
; 
_shelx_res_checksum   43361 
  
_shelx_hkl_file 
; 
  -1   0   0   20.46    0.65 
  -1   0   0   19.63    0.60 
  -1   0   0   21.09    0.70 
   1   0   0   20.21    0.65 
   1   0   0   21.07    0.64 
   1   0   0   20.71    0.70 
   1   0   0   20.44    0.60 
  -2   0   0   45.24    1.40 
  -2   0   0   45.32    1.38 
  -2   0   0   45.07    1.30 
   2   0   0   42.55    1.30 
   2   0   0   45.09    1.41 
   2   0   0   43.89    1.51 
   2   0   0   43.23    1.38 
  -3   0   0    1.17    0.08 
  -3   0   0    1.47    0.10 
  -3   0   0    1.33    0.11 
   3   0   0    1.15    0.16 
   3   0   0    1.18    0.08 
   3   0   0    1.53    0.14 
   3   0   0    1.24    0.10 
  -4   0   0    9.28    0.33 
  -4   0   0    8.73    0.36 
  -4   0   0    8.66    0.34 
   4   0   0    8.74    0.40 
   4   0   0    9.12    0.34 
   4   0   0    8.85    0.34 
   4   0   0    8.80    0.46 
  -5   0   0    4.30    0.20 
  -5   0   0    4.24    0.22 
   5   0   0    4.01    0.34 
   5   0   0    4.30    0.21 
   5   0   0    3.94    0.22 
   5   0   0    4.25    0.28 
  -6   0   0    0.13    0.06 
  -6   0   0    0.15    0.05 
   6   0   0    0.15    0.14 
   6   0   0    0.08    0.07 
   6   0   0    0.16    0.06 
   6   0   0    0.15    0.12 
  -7   0   0    1.80    0.19 
   7   0   0    1.64    0.28 
   7   0   0    1.92    0.27 
   7   0   0    1.66    0.19 
   7   0   0    1.32    0.15 
   8   0   0   13.04    0.69 
   8   0   0   13.02    0.56 
   8   0   0   13.03    0.77 
   9   0   0   16.28    0.93 
   9   0   0   15.72    0.83 
   9   0   0   16.47    0.69 
  10   0   0   22.63    1.13 
  10   0   0   24.95    0.96 
  10   0   0   24.54    1.26 
  10  -1   0    7.21    0.63 
  10  -1   0    7.69    0.61 
  10  -1   0    7.79    0.47 
   9  -1   0    2.96    0.39 
   9  -1   0    3.04    0.30 
   9  -1   0    2.77    0.42 
   8  -1   0    1.72    0.21 
   8  -1   0    1.53    0.31 
   8  -1   0    1.62    0.28 
  -8   1   0    1.78    0.16 
   7  -1   0    0.66    0.13 
   7  -1   0    0.67    0.19 
   7  -1   0    0.59    0.11 
   7  -1   0    0.74    0.21 
  -7   1   0    0.58    0.10 
  -7   1   0    0.60    0.12 
   6  -1   0   30.17    1.01 
   6  -1   0   26.92    0.97 
   6  -1   0   29.14    1.18 
   6  -1   0   28.48    1.11 
  -6   1   0   29.13    0.98 
  -6   1   0   30.51    0.98 
   5  -1   0    1.61    0.20 
   5  -1   0    1.83    0.17 
   5  -1   0    1.93    0.24 
   5  -1   0    1.86    0.14 
  -5   1   0    1.67    0.12 
  -5   1   0    1.95    0.15 
   4  -1   0   26.02    0.92 
   4  -1   0   24.91    0.85 
   4  -1   0   26.00    0.98 
   4  -1   0   26.17    0.83 
  -4   1   0   25.27    0.89 
  -4   1   0   24.97    0.84 
  -4   1   0   25.46    0.82 
   3  -1   0  107.31    3.36 
   3  -1   0  107.48    3.53 
   3  -1   0  108.68    3.31 
   3  -1   0  105.24    3.10 
  -3   1   0  105.84    3.30 
  -3   1   0  109.26    3.34 
  -3   1   0  106.06    3.10 
   2  -1   0  213.96    7.00 
   2  -1   0  243.75    7.49 
   2  -1   0  260.93    7.90 
   2  -1   0  245.19    7.53 
  -2   1   0  263.86    7.94 
  -2   1   0  244.54    7.48 
  -2   1   0  239.51    7.53 
   1  -1   0  103.57    2.96 
   1  -1   0  104.78    3.17 
   1  -1   0  104.99    3.17 
  -1   1   0  100.56    3.31 
  -1   1   0  103.04    2.93 
  -1   1   0   98.70    3.17 
  -1   1   0  104.06    3.16 
   0  -1   0   15.16    0.45 
   0   1   0   15.93    0.45 
  -2  -1   0    0.06    0.04 
  -2  -1   0    0.10    0.02 
  -2  -1   0    0.09    0.03 
   2   1   0    0.17    0.10 
   2   1   0    0.07    0.03 
   2   1   0    0.10    0.04 
   2   1   0    0.08    0.04 
  -3  -1   0  114.49    3.44 
  -3  -1   0  111.55    3.44 
  -3  -1   0  109.74    3.21 
   3   1   0  112.10    3.43 
   3   1   0  110.35    3.46 
   3   1   0  109.71    3.73 
   3   1   0  114.53    3.22 
  -4  -1   0   55.31    1.70 
  -4  -1   0   52.92    1.61 
   4   1   0   52.98    1.62 
   4   1   0   53.02    1.75 
   4   1   0   54.72    1.95 
   4   1   0   56.99    1.71 
  -5  -1   0    2.09    0.14 
  -5  -1   0    2.12    0.12 
   5   1   0    1.85    0.26 
   5   1   0    1.96    0.19 
   5   1   0    2.00    0.13 
   5   1   0    2.11    0.15 
  -6  -1   0    8.63    0.33 
  -6  -1   0    9.16    0.37 
   6   1   0    7.38    0.53 
   6   1   0    8.76    0.45 
   6   1   0    8.62    0.37 
   6   1   0    8.91    0.38 
  -7  -1   0    4.52    0.26 
  -7  -1   0    4.65    0.22 
   7   1   0    3.76    0.44 
   7   1   0    4.08    0.26 
   7   1   0    4.31    0.25 
   7   1   0    4.34    0.35 
  -8  -1   0    3.94    0.26 
   8   1   0    4.36    0.39 
   8   1   0    4.28    0.28 
   8   1   0    4.86    0.53 
   9   1   0    0.13    0.10 
   9   1   0    0.21    0.23 
   9   1   0    0.22    0.18 
  10   1   0    2.66    0.40 
  10   1   0    2.15    0.42 
  10  -2   0    1.20    0.30 
  10  -2   0    1.55    0.33 
  10  -2   0    1.56    0.25 
   9  -2   0    6.76    0.53 
   9  -2   0    6.56    0.41 
   9  -2   0    5.72    0.52 
   8  -2   0    0.50    0.14 
   8  -2   0    0.62    0.20 
   8  -2   0    0.80    0.22 
  -8   2   0    0.92    0.14 
   7  -2   0   18.79    0.70 
   7  -2   0   17.80    0.83 
   7  -2   0   17.68    0.82 
  -7   2   0   17.43    0.67 
   6  -2   0   -0.04    0.11 
   6  -2   0    0.12    0.12 
   6  -2   0    0.07    0.06 
   6  -2   0   -0.07    0.06 
  -6   2   0    0.06    0.05 
  -6   2   0    0.04    0.06 
   5  -2   0   24.38    0.82 
   5  -2   0   24.07    0.84 
   5  -2   0   24.40    0.94 
   5  -2   0   23.36    0.94 
  -5   2   0   23.82    0.83 
  -5   2   0   25.00    0.82 
   4  -2   0    0.20    0.06 
   4  -2   0    0.20    0.07 
   4  -2   0    0.12    0.09 
   4  -2   0    0.20    0.10 
  -4   2   0    0.26    0.06 
  -4   2   0    0.10    0.06 
  -4   2   0    0.19    0.08 
   3  -2   0   12.30    0.43 
   3  -2   0   12.00    0.47 
   3  -2   0   11.59    0.42 
   3  -2   0   12.09    0.49 
  -3   2   0   11.85    0.47 
  -3   2   0   12.24    0.42 
  -3   2   0   12.04    0.47 
  -3   2   0   11.15    0.42 
   2  -2   0   58.95    1.76 
   2  -2   0   60.01    1.92 
   2  -2   0   61.52    1.88 
  -2   2   0   59.24    1.92 
  -2   2   0   59.57    1.97 
  -2   2   0   60.67    1.76 
  -2   2   0   61.57    1.88 
   1  -2   0   31.46    0.96 
   1  -2   0   32.64    1.02 
  -1   2   0   33.63    1.06 
  -1   2   0   33.41    1.02 
  -1   2   0   32.09    0.96 
   0  -2   0   95.04    2.72 
   0   2   0   99.31    2.90 
   0   2   0   90.07    2.71 
   0   2   0   94.63    2.89 
   2   2   0  986.23   30.28 
   2   2   0  953.14   28.67 
   2   2   0 1000.00   30.25 
  -3  -2   0    0.14    0.04 
   3   2   0    0.15    0.13 
   3   2   0    0.07    0.04 
   3   2   0    0.12    0.03 
   3   2   0    0.15    0.05 
  -4  -2   0   28.32    0.89 
  -4  -2   0   29.13    0.91 
  -4  -2   0   29.92    0.92 
   4   2   0   29.84    0.94 
   4   2   0   28.84    1.16 
   4   2   0   28.67    0.90 
   4   2   0   28.67    0.97 
  -5  -2   0    0.24    0.04 
  -5  -2   0    0.24    0.06 
   5   2   0    0.26    0.07 
   5   2   0    0.19    0.08 
   5   2   0    0.29    0.06 
   5   2   0    0.22    0.15 
  -6  -2   0    0.18    0.07 
  -6  -2   0    0.26    0.05 
   6   2   0    0.30    0.07 
   6   2   0    0.18    0.18 
   6   2   0    0.38    0.09 
   6   2   0    0.12    0.10 
  -7  -2   0    1.35    0.15 
  -7  -2   0    1.48    0.10 
   7   2   0    1.01    0.29 
   7   2   0    1.48    0.16 
   7   2   0    1.31    0.20 
   7   2   0    1.26    0.15 
   8   2   0   16.27    0.91 
   8   2   0   14.44    0.60 
   8   2   0   14.19    0.71 
   9   2   0    8.23    0.43 
   9   2   0    8.24    0.55 
   9   2   0    8.00    0.71 
  10   2   0    2.52    0.37 
  10   2   0    2.77    0.49 
  10  -3   0    3.86    0.46 
  10  -3   0    4.86    0.38 
   9  -3   0    2.14    0.35 
   9  -3   0    1.99    0.31 
   9  -3   0    1.35    0.21 
   8  -3   0    1.36    0.24 
   8  -3   0    1.64    0.28 
   8  -3   0    1.12    0.19 
  -8   3   0    1.40    0.17 
   7  -3   0   25.16    1.03 
   7  -3   0   25.54    1.07 
   7  -3   0   23.50    0.90 
  -7   3   0   25.47    0.90 
   6  -3   0    8.29    0.39 
   6  -3   0    7.91    0.48 
   6  -3   0    7.59    0.42 
  -6   3   0    8.24    0.36 
   5  -3   0   10.41    0.53 
   5  -3   0   10.75    0.48 
   5  -3   0   10.16    0.44 
  -5   3   0   10.78    0.43 
  -5   3   0   10.87    0.44 
   4  -3   0   10.02    0.49 
   4  -3   0   10.38    0.42 
  -4   3   0   10.90    0.48 
  -4   3   0   10.84    0.41 
  -4   3   0   11.35    0.42 
   3  -3   0   25.60    0.85 
   3  -3   0   24.81    0.92 
   3  -3   0   26.33    0.82 
  -3   3   0   26.79    0.82 
  -3   3   0   24.41    0.84 
  -3   3   0   25.23    0.89 
  -3   3   0   25.64    0.91 
   2  -3   0    0.01    0.03 
   2  -3   0   -0.03    0.04 
   2  -3   0   -0.08    0.06 
  -2   3   0    0.05    0.04 
  -2   3   0    0.03    0.04 
  -2   3   0   -0.01    0.05 
   1  -3   0   23.20    0.71 
   1  -3   0   23.54    0.74 
   1  -3   0   23.77    0.77 
  -1   3   0   22.22    0.74 
  -1   3   0   23.23    0.78 
  -1   3   0   22.93    0.70 
   0  -3   0  147.76    3.89 
   0   3   0  127.44    3.89 
   0   3   0  131.76    4.16 
   0   3   0  137.79    4.17 
  -2  -3   0    1.36    0.06 
   2   3   0    1.35    0.06 
   3   3   0   13.95    0.66 
   3   3   0   13.86    0.44 
   3   3   0   13.82    0.43 
   3   3   0   13.66    0.46 
  -4  -3   0   11.76    0.38 
   4   3   0   11.31    0.42 
   4   3   0   11.41    0.39 
   4   3   0   11.45    0.39 
   4   3   0   10.46    0.60 
  -5  -3   0   14.69    0.49 
   5   3   0   13.75    0.50 
   5   3   0   14.85    0.77 
   5   3   0   14.93    0.51 
   5   3   0   14.54    0.56 
  -6  -3   0    4.33    0.22 
   6   3   0    4.44    0.22 
   6   3   0    4.93    0.52 
   6   3   0    4.73    0.24 
   6   3   0    4.43    0.28 
  -7  -3   0    5.41    0.27 
   7   3   0    5.62    0.53 
   7   3   0    5.09    0.27 
   7   3   0    5.13    0.35 
   7   3   0    5.51    0.29 
   8   3   0    5.18    0.39 
   8   3   0    5.01    0.58 
   8   3   0    5.65    0.31 
   9   3   0    6.01    0.69 
   9   3   0    6.16    0.47 
  10   3   0    7.81    0.58 
  10  -4   0    3.10    0.43 
  10  -4   0    3.79    0.39 
   9  -4   0   20.58    0.86 
   9  -4   0   20.46    1.05 
   8  -4   0    3.33    0.39 
   8  -4   0    3.72    0.31 
  -8   4   0    3.48    0.25 
   7  -4   0    1.06    0.18 
   7  -4   0    1.23    0.25 
  -7   4   0    1.48    0.18 
   6  -4   0    4.28    0.41 
   6  -4   0    3.43    0.26 
  -6   4   0    3.85    0.23 
   5  -4   0    3.60    0.23 
   5  -4   0    3.88    0.32 
  -5   4   0    4.26    0.29 
  -5   4   0    3.51    0.21 
   4  -4   0    0.01    0.08 
   4  -4   0    0.03    0.06 
  -4   4   0    0.09    0.06 
  -4   4   0    0.00    0.08 
  -4   4   0    0.17    0.06 
  -4   4   0   -0.04    0.05 
   3  -4   0    1.36    0.11 
   3  -4   0    1.51    0.14 
   3  -4   0    1.55    0.19 
  -3   4   0    1.62    0.19 
  -3   4   0    1.18    0.11 
  -3   4   0    1.39    0.11 
  -3   4   0    1.19    0.12 
   2  -4   0   39.28    1.25 
   2  -4   0   38.24    1.19 
  -2   4   0   39.73    1.32 
  -2   4   0   39.47    1.19 
  -2   4   0   39.03    1.25 
   1  -4   0    0.90    0.07 
   1  -4   0    0.95    0.08 
   1  -4   0    0.89    0.09 
  -1   4   0    0.80    0.07 
  -1   4   0    0.86    0.11 
  -1   4   0    0.79    0.08 
   0  -4   0  173.08    5.27 
   0   4   0  196.94    5.25 
   0   4   0  177.85    5.63 
   0   4   0  189.21    5.64 
  -3  -4   0   47.33    1.35 
   3   4   0   47.40    1.76 
   3   4   0   46.81    1.36 
  -4  -4   0    0.06    0.03 
   4   4   0    0.06    0.03 
   4   4   0   -0.01    0.15 
   4   4   0    0.03    0.02 
  -5  -4   0    0.10    0.04 
   5   4   0    0.08    0.06 
   5   4   0    0.05    0.03 
   5   4   0    0.09    0.05 
   5   4   0    0.03    0.17 
  -6  -4   0    0.71    0.09 
   6   4   0    0.72    0.25 
   6   4   0    0.78    0.10 
   6   4   0    0.92    0.10 
   6   4   0    0.88    0.14 
  -7  -4   0    0.91    0.12 
   7   4   0    0.59    0.28 
   7   4   0    0.96    0.12 
   7   4   0    0.72    0.15 
   7   4   0    0.69    0.12 
   8   4   0    1.65    0.25 
   8   4   0    2.19    0.43 
   9   4   0    1.14    0.24 
   9   4   0    1.59    0.40 
   9  -5   0   13.82    0.67 
   9  -5   0   14.23    0.85 
  -9   5   0   13.84    0.63 
   8  -5   0    0.13    0.11 
   8  -5   0   -0.22    0.13 
  -8   5   0    0.01    0.06 
   7  -5   0    9.80    0.61 
   7  -5   0    9.23    0.48 
  -7   5   0    9.92    0.45 
   6  -5   0   59.94    2.07 
   6  -5   0   56.55    1.83 
  -6   5   0   56.48    1.89 
   5  -5   0    2.56    0.28 
   5  -5   0    2.46    0.21 
  -5   5   0    2.86    0.19 
  -5   5   0    2.93    0.26 
   4  -5   0    0.20    0.08 
   4  -5   0    0.24    0.11 
  -4   5   0    0.23    0.09 
  -4   5   0    0.27    0.07 
  -4   5   0    0.28    0.06 
   3  -5   0    9.28    0.44 
   3  -5   0    8.20    0.36 
  -3   5   0    8.98    0.36 
  -3   5   0    8.88    0.34 
  -3   5   0    9.19    0.36 
  -3   5   0    9.22    0.43 
   2  -5   0    2.94    0.17 
   2  -5   0    2.76    0.20 
  -2   5   0    2.96    0.16 
  -2   5   0    2.99    0.16 
  -2   5   0    2.97    0.21 
   1  -5   0   25.95    0.82 
   1  -5   0   25.41    0.80 
   1  -5   0   25.48    0.81 
  -1   5   0   26.34    0.90 
  -1   5   0   25.14    0.83 
  -1   5   0   25.49    0.79 
   0  -5   0   51.89    1.50 
   0   5   0   51.45    1.63 
   0   5   0   52.68    1.60 
   0   5   0   50.18    1.50 
   1   5   0    0.23    0.03 
   3   5   0    5.12    0.39 
  -4  -5   0    9.53    0.29 
   4   5   0    9.80    0.34 
   4   5   0    9.43    0.31 
   4   5   0    9.55    0.32 
   4   5   0    9.53    0.60 
  -5  -5   0    0.37    0.05 
   5   5   0    0.44    0.08 
   5   5   0    0.64    0.23 
   5   5   0    0.32    0.06 
   5   5   0    0.27    0.05 
   6   5   0    0.74    0.13 
   6   5   0    0.93    0.10 
   6   5   0    0.94    0.10 
   6   5   0    0.43    0.25 
   7   5   0    0.01    0.10 
   7   5   0   -0.03    0.04 
   7   5   0    0.40    0.24 
   8   5   0   19.69    0.82 
   8   5   0   18.60    1.13 
   9   5   0   -0.10    0.14 
   9  -6   0    2.77    0.31 
  -9   6   0    2.73    0.25 
   8  -6   0    4.29    0.35 
   8  -6   0    3.63    0.44 
  -8   6   0    4.15    0.29 
   7  -6   0   25.35    0.95 
   7  -6   0   25.97    1.12 
  -7   6   0   23.20    0.92 
   6  -6   0    0.11    0.14 
   6  -6   0   -0.05    0.07 
  -6   6   0    0.05    0.06 
   5  -6   0   72.41    2.44 
   5  -6   0   69.10    2.19 
  -5   6   0   72.87    2.41 
  -5   6   0   70.13    2.30 
   4  -6   0    3.16    0.28 
   4  -6   0    2.73    0.21 
  -4   6   0    3.03    0.19 
  -4   6   0    3.74    0.28 
   3  -6   0    1.48    0.19 
   3  -6   0    1.45    0.15 
  -3   6   0    1.40    0.13 
  -3   6   0    1.28    0.18 
   2  -6   0    2.29    0.16 
   2  -6   0    2.36    0.17 
  -2   6   0    2.28    0.14 
  -2   6   0    2.16    0.20 
  -2   6   0    2.54    0.16 
   1  -6   0    0.94    0.10 
  -1   6   0    1.03    0.10 
  -1   6   0    0.91    0.09 
  -1   6   0    1.07    0.14 
   0  -6   0    0.26    0.05 
   0   6   0    0.28    0.05 
   0   6   0    0.28    0.04 
   0   6   0    0.25    0.07 
  -1  -6   0   34.67    0.99 
  -1  -6   0   33.88    0.99 
   1   6   0   34.53    1.00 
   3   6   0    8.79    0.55 
   4   6   0    3.99    0.47 
   5   6   0   19.88    0.60 
   5   6   0   19.85    0.65 
   5   6   0   19.92    0.68 
   5   6   0   19.67    1.02 
  -6  -6   0    4.35    0.17 
   6   6   0    3.92    0.51 
   6   6   0    4.36    0.20 
   6   6   0    5.09    0.26 
   6   6   0    4.13    0.20 
   7   6   0    0.11    0.23 
   7   6   0    0.21    0.11 
   8   6   0    0.06    0.12 
   8   6   0    0.32    0.28 
   8  -7   0    1.48    0.24 
  -8   7   0    1.51    0.21 
   7  -7   0   50.21    1.68 
  -7   7   0   49.14    1.70 
   6  -7   0    0.52    0.14 
   6  -7   0    0.09    0.14 
  -6   7   0    0.32    0.09 
   5  -7   0   58.08    2.02 
   5  -7   0   56.22    1.81 
  -5   7   0   56.94    2.00 
  -5   7   0   56.71    1.88 
   4  -7   0   60.07    1.86 
   4  -7   0   58.86    2.04 
  -4   7   0   61.48    2.06 
  -4   7   0   58.83    1.94 
   3  -7   0    2.17    0.21 
   3  -7   0    1.88    0.18 
  -3   7   0    2.28    0.25 
  -3   7   0    2.12    0.16 
   2  -7   0    3.31    0.20 
   2  -7   0    3.63    0.18 
  -2   7   0    3.35    0.25 
  -2   7   0    3.55    0.19 
   1  -7   0    4.15    0.20 
  -1   7   0    4.19    0.20 
  -1   7   0    3.92    0.19 
  -1   7   0    4.55    0.27 
   0  -7   0   27.56    0.85 
   0   7   0   28.30    0.85 
   0   7   0   28.43    0.96 
   0   7   0   27.07    0.90 
   1   7   0   25.62    0.82 
   1   7   0   24.33    0.74 
   1   7   0   25.54    0.80 
   2   7   0   -0.03    0.13 
   3   7   0   13.75    0.76 
   4   7   0   17.91    0.95 
   5   7   0    3.34    0.47 
   5   7   0    2.45    0.12 
   6   7   0   15.73    0.96 
   6   7   0   16.20    0.55 
   6   7   0   15.38    0.59 
   7   7   0    1.67    0.40 
   7   7   0    1.82    0.20 
   8   7   0    0.12    0.13 
   8  -8   0    4.37    0.37 
  -8   8   0    4.39    0.32 
   7  -8   0   35.08    1.25 
  -7   8   0   33.41    1.24 
   6  -8   0   21.09    0.84 
  -6   8   0   21.33    0.83 
   5  -8   0    0.78    0.15 
  -5   8   0    1.15    0.15 
   4  -8   0    8.33    0.44 
   4  -8   0    7.72    0.39 
  -4   8   0    7.69    0.37 
  -4   8   0    8.29    0.48 
   3  -8   0   74.90    2.28 
   3  -8   0   76.62    2.41 
  -3   8   0   75.44    2.52 
  -3   8   0   75.17    2.48 
  -3   8   0   73.46    2.40 
   2  -8   0    1.45    0.15 
  -2   8   0    1.39    0.18 
  -2   8   0    1.58    0.13 
   1  -8   0    0.95    0.11 
  -1   8   0    1.06    0.16 
  -1   8   0    1.19    0.11 
   0  -8   0    9.65    0.34 
   0   8   0    9.66    0.34 
   0   8   0    9.20    0.35 
   0   8   0    9.78    0.43 
   1   8   0   34.49    1.01 
   1   8   0   35.06    1.14 
   1   8   0   34.46    1.39 
   1   8   0   34.30    1.09 
   2   8   0   17.05    0.86 
   3   8   0    5.08    0.52 
   4   8   0   26.88    1.28 
   5   8   0    2.35    0.41 
   5   8   0    3.19    0.14 
   6   8   0    0.77    0.08 
   6   8   0    0.53    0.10 
   6   8   0    0.27    0.29 
   7   8   0    6.46    0.34 
   7  -9   0    0.14    0.13 
  -7   9   0    0.27    0.12 
   6  -9   0    0.11    0.11 
   5  -9   0    2.55    0.26 
  -5   9   0    2.78    0.23 
   4  -9   0    3.88    0.27 
  -4   9   0    4.04    0.25 
   3  -9   0    0.30    0.10 
  -3   9   0    0.23    0.08 
  -3   9   0    0.47    0.10 
   2  -9   0   -0.07    0.06 
  -2   9   0    0.05    0.10 
  -2   9   0   -0.04    0.10 
  -2   9   0   -0.05    0.05 
   1  -9   0    0.07    0.06 
  -1   9   0    0.24    0.13 
  -1   9   0   -0.01    0.09 
  -1   9   0    0.01    0.05 
   0  -9   0    0.42    0.07 
   0   9   0    0.44    0.18 
   0   9   0    0.34    0.06 
   0   9   0    0.46    0.12 
   1   9   0    2.67    0.36 
   1   9   0    2.17    0.18 
   1   9   0    2.06    0.12 
   2   9   0    5.35    0.54 
   3   9   0    1.67    0.33 
   4   9   0    6.27    0.58 
   5   9   0    2.69    0.46 
   6   9   0   -0.03    0.04 
   6   9   0   -0.01    0.24 
   6   9   0    0.00    0.06 
   6 -10   0    0.48    0.16 
  -6  10   0    0.39    0.12 
   5 -10   0   20.57    0.81 
  -5  10   0   20.32    0.81 
   4 -10   0   34.82    1.19 
  -4  10   0   34.66    1.22 
   3 -10   0   13.27    0.53 
  -3  10   0   11.84    0.51 
   2 -10   0    5.02    0.27 
  -2  10   0    4.66    0.33 
  -2  10   0    4.60    0.25 
   1 -10   0    4.14    0.22 
  -1  10   0    4.02    0.22 
  -1  10   0    4.09    0.36 
   0 -10   0    0.61    0.08 
   0  10   0    0.60    0.15 
   0  10   0    0.81    0.10 
   0  10   0    0.50    0.21 
   1  10   0    2.60    0.38 
   1  10   0    2.68    0.21 
   1  10   0    2.38    0.14 
   2  10   0   -0.05    0.06 
   2  10   0   -0.02    0.03 
   2  10   0    0.03    0.18 
   3  10   0    3.97    0.49 
   4  10   0    3.75    0.52 
   5  10   0   13.12    0.93 
   5 -11   0    8.16    0.46 
  -5  11   0    7.94    0.43 
   4 -11   0    2.24    0.25 
  -4  11   0    2.43    0.24 
   3 -11   0    0.25    0.10 
  -3  11   0    0.11    0.08 
   2 -11   0    1.02    0.14 
  -2  11   0    0.86    0.13 
   1 -11   0    6.58    0.29 
  -1  11   0    6.18    0.30 
   0 -11   0    0.15    0.05 
   0  11   0    0.11    0.06 
   0  11   0    0.12    0.20 
   1  11   0    1.99    0.35 
   1  11   0    2.12    0.14 
   2  11   0    6.65    0.26 
   2  11   0    7.39    0.61 
   2  11   0    6.89    0.34 
   3  11   0   17.12    1.01 
   4  11   0    3.23    0.51 
   3 -12   0    0.67    0.14 
  -3  12   0    0.80    0.14 
   2 -12   0    2.16    0.20 
  -2  12   0    1.96    0.20 
   1 -12   0   -0.02    0.06 
  -1  12   0   -0.01    0.06 
   0  12   0    3.52    0.21 
   1  12   0    2.01    0.14 
   2  12   0    0.07    0.05 
   2  12   0   -0.05    0.23 
   1  12  -1   15.28    0.55 
   0  12  -1   11.89    0.47 
  -1  12  -1    2.42    0.18 
  -2  12  -1    3.73    0.24 
   2 -12   1    3.55    0.23 
   3  11  -1    0.10    0.24 
   2  11  -1    4.96    0.58 
   2  11  -1    3.86    0.17 
   2  11  -1    3.96    0.23 
   1  11  -1    0.61    0.24 
   1  11  -1    0.55    0.08 
   0  11  -1    1.03    0.12 
   0  11  -1    0.57    0.26 
  -1  11  -1   27.94    0.99 
   1 -11   1   29.63    0.92 
  -2  11  -1   20.15    0.76 
   2 -11   1   21.23    0.73 
  -3  11  -1    0.98    0.14 
   3 -11   1    0.98    0.15 
  -4  11  -1   -0.03    0.07 
   4 -11   1    0.06    0.10 
  -5  11  -1    0.46    0.12 
   5 -11   1    0.24    0.13 
   4  10  -1    0.10    0.24 
   3  10  -1    2.49    0.43 
   2  10  -1    1.59    0.09 
   2  10  -1    1.63    0.14 
   2  10  -1    1.54    0.32 
   1  10  -1    3.42    0.17 
   1  10  -1    3.25    0.41 
   1  10  -1    3.29    0.22 
   0  10  -1    1.32    0.17 
   0  10  -1    1.68    0.29 
   0  10  -1    1.66    0.13 
   0 -10   1    1.76    0.09 
  -1  10  -1    0.29    0.08 
  -1  10  -1    0.42    0.17 
   1 -10   1    0.43    0.09 
  -2  10  -1    8.23    0.47 
  -2  10  -1    8.06    0.36 
   2 -10   1    8.06    0.36 
  -3  10  -1   11.79    0.50 
   3 -10   1   11.96    0.51 
  -4  10  -1    1.30    0.16 
   4 -10   1    1.01    0.16 
  -5  10  -1    0.06    0.08 
   5 -10   1    0.21    0.12 
  -6  10  -1    1.48    0.20 
   6 -10   1    1.06    0.20 
   6   9  -1   12.74    0.50 
   5   9  -1    3.96    0.56 
   4   9  -1    5.18    0.61 
   3   9  -1    6.29    0.55 
   2   9  -1    2.47    0.39 
   1   9  -1   -0.02    0.17 
   1   9  -1    0.33    0.06 
   1   9  -1    0.40    0.09 
   0   9  -1    8.47    0.38 
   0   9  -1    7.95    0.32 
   0   9  -1    7.33    0.51 
   0   9  -1    7.76    0.29 
   0  -9   1    8.10    0.28 
  -1   9  -1    8.28    0.34 
  -1   9  -1    8.61    0.48 
  -1   9  -1    8.31    0.41 
   1  -9   1    7.82    0.33 
  -2   9  -1    0.49    0.14 
  -2   9  -1    0.69    0.14 
  -2   9  -1    0.65    0.11 
   2  -9   1    0.58    0.10 
  -3   9  -1   22.65    0.82 
   3  -9   1   22.51    0.80 
  -4   9  -1   17.06    0.68 
   4  -9   1   18.04    0.69 
  -5   9  -1    5.28    0.31 
   5  -9   1    5.31    0.34 
  -6   9  -1   28.73    1.09 
   6  -9   1   30.30    1.10 
  -7   9  -1    0.42    0.12 
   7  -9   1    0.12    0.14 
   7   8  -1    0.74    0.16 
   6   8  -1    0.48    0.11 
   6   8  -1    0.66    0.08 
   6   8  -1    0.76    0.33 
   5   8  -1    0.42    0.05 
   5   8  -1    0.42    0.07 
   5   8  -1   -0.05    0.21 
   4   8  -1    0.87    0.27 
   3   8  -1   12.81    0.77 
   2   8  -1    0.32    0.19 
   1   8  -1    1.52    0.09 
   1   8  -1    1.51    0.13 
   1   8  -1    1.46    0.27 
   0   8  -1   20.76    0.74 
   0   8  -1   19.96    0.68 
   0   8  -1   20.38    0.63 
   0   8  -1   20.87    0.90 
   0  -8   1   19.69    0.63 
  -1   8  -1    2.30    0.25 
  -1   8  -1    2.37    0.20 
  -1   8  -1    2.29    0.15 
   1  -8   1    2.19    0.15 
  -2   8  -1   46.58    1.54 
  -2   8  -1   44.19    1.56 
  -2   8  -1   43.62    1.45 
   2  -8   1   43.01    1.38 
  -3   8  -1   45.23    1.55 
  -3   8  -1   43.11    1.44 
   3  -8   1   43.42    1.41 
   3  -8   1   42.50    1.39 
  -4   8  -1    0.14    0.08 
   4  -8   1    0.12    0.10 
   4  -8   1    0.11    0.09 
  -5   8  -1    4.58    0.28 
   5  -8   1    4.08    0.29 
  -6   8  -1    0.08    0.08 
   6  -8   1   -0.03    0.10 
  -7   8  -1    5.68    0.35 
   7  -8   1    5.94    0.40 
  -8   8  -1    0.71    0.17 
   8  -8   1    0.68    0.20 
   8   7  -1    0.92    0.19 
   7   7  -1   13.62    0.60 
   7   7  -1   14.11    0.98 
   6   7  -1   11.62    0.84 
   6   7  -1   11.28    0.41 
   6   7  -1   10.61    0.46 
   5   7  -1   -0.05    0.20 
   5   7  -1    0.04    0.05 
   5   7  -1    0.03    0.03 
   4   7  -1    0.27    0.21 
   3   7  -1    2.34    0.34 
   2   7  -1    0.51    0.19 
   1   7  -1   10.71    0.58 
   1   7  -1    9.84    0.34 
   0   7  -1   19.79    0.68 
   0   7  -1   18.59    0.59 
   0   7  -1   20.89    0.85 
   0   7  -1   18.31    0.63 
   0  -7   1   18.84    0.60 
  -1   7  -1    0.42    0.07 
  -1   7  -1    0.35    0.09 
  -1   7  -1    0.47    0.13 
  -1   7  -1    0.42    0.07 
   1  -7   1    0.27    0.07 
  -2   7  -1   14.38    0.56 
  -2   7  -1   13.36    0.51 
  -2   7  -1   14.11    0.58 
   2  -7   1   13.20    0.50 
  -3   7  -1   11.27    0.45 
  -3   7  -1   11.90    0.53 
   3  -7   1   10.93    0.45 
   3  -7   1   11.36    0.48 
  -4   7  -1    4.27    0.25 
  -4   7  -1    4.27    0.32 
   4  -7   1    4.68    0.32 
   4  -7   1    4.18    0.27 
  -5   7  -1    0.07    0.07 
  -5   7  -1    0.00    0.11 
   5  -7   1   -0.01    0.09 
   5  -7   1   -0.07    0.09 
  -6   7  -1    3.14    0.23 
   6  -7   1    2.34    0.30 
   6  -7   1    2.56    0.27 
  -7   7  -1    0.21    0.11 
   7  -7   1   -0.02    0.11 
  -8   7  -1   -0.07    0.07 
   8  -7   1    0.06    0.13 
  -9   7  -1    1.15    0.20 
   9  -7   1    1.16    0.23 
   8   6  -1    2.07    0.27 
   7   6  -1    1.99    0.23 
   7   6  -1    2.34    0.46 
   6   6  -1    2.88    0.16 
   6   6  -1    2.78    0.44 
   6   6  -1    2.65    0.22 
  -6  -6   1    2.82    0.12 
   5   6  -1   -0.01    0.18 
   5   6  -1    0.06    0.06 
   5   6  -1    0.04    0.03 
   4   6  -1    8.45    0.30 
   4   6  -1    8.11    0.60 
   3   6  -1   13.63    0.74 
   2   6  -1    0.15    0.14 
   1   6  -1   42.46    1.60 
   0   6  -1   31.08    1.18 
   0   6  -1   31.11    0.98 
   0   6  -1   30.34    0.92 
   0   6  -1   31.33    1.02 
   0  -6   1   30.41    0.92 
  -1   6  -1    0.27    0.08 
  -1   6  -1    0.18    0.05 
  -1   6  -1    0.07    0.09 
  -1   6  -1    0.12    0.05 
   1  -6   1    0.14    0.05 
  -2   6  -1    4.28    0.21 
  -2   6  -1    4.48    0.23 
  -2   6  -1    4.59    0.22 
  -2   6  -1    4.92    0.28 
   2  -6   1    4.28    0.22 
   2  -6   1    4.67    0.22 
  -3   6  -1    2.42    0.21 
  -3   6  -1    2.17    0.16 
   3  -6   1    2.31    0.17 
   3  -6   1    2.41    0.20 
  -4   6  -1   15.13    0.65 
  -4   6  -1   15.57    0.58 
   4  -6   1   14.09    0.57 
  -5   6  -1   13.20    0.53 
  -5   6  -1   13.51    0.62 
   5  -6   1   12.40    0.63 
   5  -6   1   12.92    0.54 
  -6   6  -1   -0.07    0.06 
   6  -6   1    0.08    0.10 
   6  -6   1   -0.04    0.12 
  -7   6  -1    2.67    0.22 
   7  -6   1    3.21    0.38 
   7  -6   1    2.36    0.26 
  -8   6  -1    0.32    0.11 
   8  -6   1    0.17    0.13 
   8  -6   1    0.22    0.18 
  -9   6  -1    0.95    0.18 
   9  -6   1    0.68    0.20 
   9   5  -1    0.03    0.16 
   8   5  -1    0.00    0.14 
   8   5  -1    0.59    0.33 
   7   5  -1    3.97    0.31 
   7   5  -1    3.95    0.53 
   6   5  -1    2.91    0.17 
   6   5  -1    2.94    0.23 
   6   5  -1    3.46    0.48 
   6   5  -1    2.75    0.16 
  -6  -5   1    2.91    0.15 
   5   5  -1   91.03    3.33 
   5   5  -1   87.71    2.85 
   5   5  -1   90.02    2.62 
   5   5  -1   93.68    2.81 
  -5  -5   1   91.18    2.61 
   4   5  -1   47.81    1.54 
   4   5  -1   49.81    1.93 
   4   5  -1   50.34    1.52 
   4   5  -1   47.89    1.41 
   3   5  -1   69.07    2.52 
   2   5  -1    6.53    0.43 
   1   5  -1   16.73    0.74 
   0   5  -1    0.96    0.07 
   0   5  -1    1.10    0.10 
   0   5  -1    1.22    0.17 
   0   5  -1    0.96    0.07 
   0  -5   1    1.03    0.08 
  -1   5  -1   72.81    2.26 
  -1   5  -1   70.57    2.30 
  -1   5  -1   73.98    2.12 
  -1   5  -1   73.77    2.44 
   1  -5   1   72.15    2.12 
  -2   5  -1   23.91    0.86 
  -2   5  -1   24.45    0.83 
  -2   5  -1   24.54    0.77 
  -2   5  -1   23.63    0.81 
   2  -5   1   23.79    0.78 
   2  -5   1   24.42    0.84 
  -3   5  -1    8.46    0.35 
  -3   5  -1    8.52    0.40 
  -3   5  -1    8.60    0.35 
   3  -5   1    8.13    0.35 
  -4   5  -1  126.34    3.76 
  -4   5  -1  121.48    3.84 
   4  -5   1  116.17    3.54 
   4  -5   1  116.61    3.85 
  -5   5  -1   19.59    0.78 
  -5   5  -1   18.11    0.69 
   5  -5   1   18.94    0.81 
   5  -5   1   19.01    0.70 
  -6   5  -1   55.23    1.83 
   6  -5   1   55.95    1.78 
   6  -5   1   55.27    1.98 
  -7   5  -1    9.28    0.44 
   7  -5   1    9.76    0.59 
   7  -5   1   10.17    0.49 
  -8   5  -1   11.17    0.52 
   8  -5   1   12.27    0.72 
   8  -5   1   12.16    0.58 
  -9   5  -1    0.29    0.11 
   9  -5   1    0.45    0.25 
   9  -5   1    0.39    0.15 
   9   4  -1    2.74    0.35 
   8   4  -1    7.84    0.71 
   8   4  -1    6.65    0.46 
   7   4  -1   42.58    1.32 
   7   4  -1   40.25    1.48 
   7   4  -1   43.09    1.84 
   6   4  -1   17.64    0.61 
   6   4  -1   17.55    0.97 
   6   4  -1   18.25    0.63 
   6   4  -1   17.13    0.70 
  -6  -4   1   17.69    0.60 
   5   4  -1    0.92    0.26 
   5   4  -1    1.07    0.13 
   5   4  -1    1.11    0.10 
   5   4  -1    1.05    0.09 
  -5  -4   1    0.98    0.09 
   4   4  -1    9.71    0.60 
   4   4  -1    9.39    0.32 
   4   4  -1    9.50    0.36 
   4   4  -1    9.88    0.33 
  -4  -4   1    9.46    0.32 
   3   4  -1   36.80    1.11 
   3   4  -1   35.64    1.42 
   3   4  -1   35.69    1.05 
  -3  -4   1   35.89    1.04 
   2   4  -1   31.55    1.23 
   1   4  -1   19.62    0.81 
   0   4  -1  133.49    4.01 
   0   4  -1  131.01    3.73 
   0   4  -1  131.48    4.32 
   0   4  -1  129.71    4.00 
   0  -4   1  129.29    3.73 
  -1   4  -1   11.89    0.48 
  -1   4  -1   12.09    0.42 
  -1   4  -1   12.48    0.40 
  -1   4  -1   12.25    0.45 
   1  -4   1   12.34    0.40 
   1  -4   1   11.56    0.40 
   1  -4   1   12.11    0.41 
  -2   4  -1  344.22   10.43 
  -2   4  -1  346.67    9.73 
  -2   4  -1  310.81   10.44 
   2  -4   1  344.04   10.43 
   2  -4   1  346.99   10.38 
   2  -4   1  351.13    9.75 
  -3   4  -1   45.77    1.36 
  -3   4  -1   44.21    1.49 
  -3   4  -1   43.90    1.43 
   3  -4   1   45.95    1.50 
   3  -4   1   42.43    1.36 
  -4   4  -1    5.60    0.27 
  -4   4  -1    6.41    0.33 
  -4   4  -1    5.62    0.27 
   4  -4   1    5.28    0.28 
   4  -4   1    6.64    0.36 
  -5   4  -1    4.82    0.25 
  -5   4  -1    5.14    0.32 
   5  -4   1    4.22    0.33 
   5  -4   1    4.80    0.28 
  -6   4  -1    6.13    0.31 
   6  -4   1    6.17    0.42 
   6  -4   1    6.20    0.34 
  -7   4  -1    2.02    0.20 
   7  -4   1    1.43    0.27 
   7  -4   1    1.52    0.20 
  -8   4  -1    2.06    0.22 
   8  -4   1    2.08    0.26 
   8  -4   1    1.80    0.29 
  -9   4  -1   11.31    0.52 
   9  -4   1   11.23    0.72 
   9  -4   1   10.98    0.57 
  10  -4   1    0.50    0.27 
  10  -4   1    0.82    0.22 
   9   3  -1    2.01    0.46 
   9   3  -1    1.96    0.31 
   8   3  -1    1.94    0.28 
   8   3  -1    2.21    0.24 
   8   3  -1    2.97    0.49 
   7   3  -1    0.55    0.10 
   7   3  -1    0.45    0.10 
   7   3  -1    0.48    0.16 
   7   3  -1    0.75    0.29 
  -7  -3   1    0.50    0.10 
   6   3  -1   21.87    0.73 
   6   3  -1   20.92    0.71 
   6   3  -1   19.76    1.04 
   6   3  -1   20.12    0.81 
  -6  -3   1   20.45    0.70 
   5   3  -1    0.09    0.08 
   5   3  -1    0.20    0.05 
   5   3  -1    0.19    0.06 
   5   3  -1    0.35    0.19 
  -5  -3   1    0.18    0.06 
   4   3  -1   56.68    1.91 
   4   3  -1   58.89    2.21 
   4   3  -1   60.85    1.76 
   4   3  -1   61.86    1.87 
  -4  -3   1   61.43    1.76 
   3   3  -1   53.84    1.93 
   3   3  -1   52.56    1.62 
   3   3  -1   51.76    1.64 
   3   3  -1   52.48    1.53 
   2   3  -1   62.24    2.21 
   2   3  -1   63.34    1.80 
  -2  -3   1   63.35    1.80 
   1   3  -1  209.27    7.17 
   1   3  -1  222.47    6.24 
   1   3  -1  228.28    6.23 
   0   3  -1  163.08    4.87 
   0   3  -1  152.82    5.20 
   0   3  -1  155.13    4.56 
   0   3  -1  162.20    4.86 
   0  -3   1  164.71    4.55 
  -1   3  -1   23.81    0.79 
  -1   3  -1   24.61    0.85 
  -1   3  -1   24.52    0.81 
  -1   3  -1   25.36    0.75 
   1  -3   1   24.61    0.80 
   1  -3   1   24.82    0.78 
   1  -3   1   23.60    0.75 
  -2   3  -1    4.35    0.20 
  -2   3  -1    4.88    0.20 
  -2   3  -1    4.66    0.23 
   2  -3   1    5.09    0.21 
   2  -3   1    4.68    0.21 
  -3   3  -1  136.48    4.08 
  -3   3  -1  126.11    4.03 
  -3   3  -1  132.10    3.78 
   3  -3   1  130.49    4.04 
   3  -3   1  128.21    3.78 
   3  -3   1  129.68    4.09 
  -4   3  -1   11.02    0.41 
  -4   3  -1   10.83    0.46 
  -4   3  -1   10.09    0.40 
   4  -3   1   10.11    0.47 
   4  -3   1    9.79    0.41 
   4  -3   1   10.23    0.41 
  -5   3  -1    1.71    0.20 
  -5   3  -1    1.52    0.15 
  -5   3  -1    1.47    0.13 
   5  -3   1    1.24    0.18 
   5  -3   1    1.47    0.16 
   5  -3   1    1.85    0.16 
  -6   3  -1   22.82    0.81 
   6  -3   1   22.92    0.82 
   6  -3   1   22.01    0.87 
   6  -3   1   23.01    0.94 
  -7   3  -1   15.25    0.60 
   7  -3   1   14.77    0.68 
   7  -3   1   15.89    0.75 
   7  -3   1   15.47    0.63 
  -8   3  -1    6.07    0.32 
   8  -3   1    5.71    0.36 
   8  -3   1    6.42    0.42 
   8  -3   1    5.77    0.47 
  -9   3  -1    9.46    0.46 
   9  -3   1    9.67    0.65 
   9  -3   1   10.41    0.53 
   9  -3   1    9.43    0.57 
  10  -3   1    0.57    0.17 
  10  -3   1    0.72    0.28 
   9   2  -1    0.21    0.27 
   8   2  -1    0.28    0.16 
   8   2  -1    0.13    0.22 
   8   2  -1   -0.01    0.08 
   7   2  -1    2.61    0.21 
   7   2  -1    2.35    0.18 
   7   2  -1    3.12    0.42 
   7   2  -1    2.20    0.27 
  -7  -2   1    2.49    0.19 
  -7  -2   1    2.70    0.13 
   6   2  -1    0.85    0.26 
   6   2  -1    0.68    0.11 
   6   2  -1    0.80    0.11 
   6   2  -1    0.67    0.15 
  -6  -2   1    0.89    0.12 
  -6  -2   1    0.82    0.07 
   5   2  -1   82.35    2.73 
   5   2  -1   86.22    3.06 
   5   2  -1   84.07    2.51 
   5   2  -1   88.43    2.67 
  -5  -2   1   83.88    2.51 
  -5  -2   1   86.10    2.62 
   4   2  -1   13.37    0.70 
   4   2  -1   14.75    0.50 
   4   2  -1   13.92    0.54 
   4   2  -1   14.21    0.48 
  -4  -2   1   14.54    0.45 
  -4  -2   1   14.48    0.48 
   3   2  -1    1.20    0.07 
   3   2  -1    1.14    0.21 
   3   2  -1    1.16    0.08 
   3   2  -1    1.08    0.10 
  -3  -2   1    1.16    0.08 
   2   2  -1    0.91    0.07 
   2   2  -1    0.82    0.16 
   2   2  -1    0.87    0.05 
   2   2  -1    0.85    0.06 
   1   2  -1   96.61    3.26 
   1   2  -1   97.22    2.79 
   1   2  -1  101.03    2.81 
  -1  -2   1   96.72    2.78 
  -1  -2   1   99.03    3.26 
   0   2  -1   55.73    1.62 
   0   2  -1   58.36    1.73 
   0   2  -1   56.79    1.73 
   0   2  -1   56.49    1.88 
   0  -2   1   55.38    1.88 
   0  -2   1   55.93    1.62 
  -1   2  -1   14.46    0.46 
  -1   2  -1   15.37    0.51 
  -1   2  -1   14.12    0.48 
  -1   2  -1   15.45    0.50 
   1  -2   1   15.01    0.50 
   1  -2   1   14.72    0.48 
   1  -2   1   13.78    0.46 
  -2   2  -1    0.43    0.06 
  -2   2  -1    0.69    0.09 
  -2   2  -1    0.46    0.07 
   2  -2   1    0.45    0.08 
   2  -2   1    0.34    0.05 
   2  -2   1    0.45    0.07 
  -3   2  -1    3.97    0.19 
  -3   2  -1    4.08    0.22 
  -3   2  -1    3.74    0.18 
   3  -2   1    4.02    0.19 
   3  -2   1    3.88    0.20 
   3  -2   1    4.11    0.19 
   3  -2   1    4.19    0.24 
  -4   2  -1  217.34    6.15 
  -4   2  -1  216.43    6.57 
  -4   2  -1  217.46    6.62 
   4  -2   1  209.22    6.93 
   4  -2   1  203.51    6.64 
   4  -2   1  223.29    6.59 
   4  -2   1  211.73    6.16 
  -5   2  -1   14.47    0.53 
  -5   2  -1   14.28    0.58 
  -5   2  -1   13.43    0.52 
   5  -2   1   13.88    0.61 
   5  -2   1   13.71    0.59 
   5  -2   1   14.66    0.54 
   5  -2   1   14.41    0.54 
  -6   2  -1    5.48    0.28 
  -6   2  -1    5.59    0.30 
   6  -2   1    6.03    0.30 
   6  -2   1    6.48    0.40 
   6  -2   1    5.47    0.31 
   6  -2   1    6.06    0.36 
  -7   2  -1    7.78    0.36 
   7  -2   1    8.79    0.51 
   7  -2   1    7.43    0.46 
   7  -2   1    7.85    0.40 
  -8   2  -1    0.04    0.06 
   8  -2   1    0.10    0.15 
   8  -2   1    0.06    0.15 
   8  -2   1   -0.01    0.10 
   9  -2   1    0.98    0.25 
   9  -2   1    0.90    0.18 
   9  -2   1    1.34    0.29 
  10  -2   1    0.10    0.12 
  10  -2   1    0.09    0.18 
  10  -2   1   -0.01    0.19 
  10   1  -1    0.19    0.20 
  10   1  -1    0.03    0.25 
   9   1  -1   -0.07    0.15 
   9   1  -1    0.14    0.23 
   9   1  -1    0.22    0.12 
   8   1  -1   -0.05    0.20 
   8   1  -1    0.06    0.09 
   8   1  -1    0.06    0.15 
   7   1  -1   15.44    0.60 
   7   1  -1   14.97    0.72 
   7   1  -1   14.93    0.85 
   7   1  -1   16.01    0.61 
  -7  -1   1   15.57    0.59 
  -7  -1   1   15.05    0.55 
   6   1  -1    0.15    0.06 
   6   1  -1    0.02    0.15 
   6   1  -1    0.07    0.11 
   6   1  -1    0.07    0.07 
  -6  -1   1    0.09    0.04 
  -6  -1   1    0.01    0.06 
   5   1  -1   25.91    1.12 
   5   1  -1   26.62    0.97 
   5   1  -1   26.72    0.88 
   5   1  -1   25.27    0.85 
  -5  -1   1   26.10    0.85 
  -5  -1   1   26.24    0.85 
   4   1  -1   24.40    0.78 
   4   1  -1   23.65    1.01 
   4   1  -1   24.08    0.87 
   4   1  -1   25.50    0.81 
  -4  -1   1   24.71    0.79 
  -4  -1   1   24.45    0.78 
   3   1  -1   34.80    1.05 
   3   1  -1   35.41    1.32 
   3   1  -1   34.88    1.15 
   3   1  -1   35.13    1.10 
  -3  -1   1   34.21    1.30 
  -3  -1   1   33.89    1.05 
  -3  -1   1   35.53    1.11 
  -3  -1   1   34.83    1.09 
   2   1  -1  387.12   11.86 
   2   1  -1  394.41   11.87 
   2   1  -1  388.30   11.09 
   2   1  -1  367.98   12.53 
  -2  -1   1  412.80   11.83 
  -2  -1   1  352.61   11.05 
  -2  -1   1  384.19   12.53 
  -2  -1   1  417.92   11.85 
   1   1  -1   51.23    1.47 
   1   1  -1   50.46    1.74 
   1   1  -1   51.58    1.57 
   1   1  -1   51.29    1.58 
  -1  -1   1   51.44    1.74 
  -1  -1   1   51.12    1.47 
   0   1  -1   65.14    1.83 
   0   1  -1   62.34    1.95 
   0   1  -1   63.75    1.96 
   0   1  -1   63.17    2.10 
   0  -1   1   62.66    1.83 
   0  -1   1   63.20    2.10 
   0  -1   1   65.11    1.95 
   0  -1   1   66.34    1.96 
  -1   1  -1   -0.07    0.02 
  -1   1  -1   -0.01    0.02 
  -1   1  -1    0.01    0.03 
   1  -1   1   -0.04    0.03 
   1  -1   1   -0.03    0.03 
   1  -1   1   -0.01    0.03 
  -2   1  -1    5.90    0.23 
  -2   1  -1    5.93    0.23 
  -2   1  -1    6.15    0.25 
   2  -1   1    6.05    0.26 
   2  -1   1    6.24    0.23 
   2  -1   1    5.65    0.23 
  -3   1  -1   32.10    1.05 
  -3   1  -1   30.71    1.01 
  -3   1  -1   31.66    0.97 
   3  -1   1   30.69    1.05 
   3  -1   1   32.67    1.10 
   3  -1   1   31.00    0.97 
   3  -1   1   31.84    1.02 
  -4   1  -1    5.21    0.27 
  -4   1  -1    5.97    0.24 
  -4   1  -1    5.78    0.26 
   4  -1   1    5.56    0.31 
   4  -1   1    5.45    0.30 
   4  -1   1    5.76    0.25 
   4  -1   1    5.49    0.26 
  -5   1  -1   34.07    1.07 
  -5   1  -1   32.27    1.10 
   5  -1   1   34.50    1.13 
   5  -1   1   33.86    1.25 
   5  -1   1   33.06    1.08 
   5  -1   1   33.75    1.19 
  -6   1  -1   98.47    3.02 
  -6   1  -1  101.88    3.19 
   6  -1   1  107.46    3.23 
   6  -1   1  101.94    3.31 
   6  -1   1   99.11    3.48 
   6  -1   1  101.87    3.04 
  -7   1  -1   68.38    2.25 
  -7   1  -1   71.84    2.17 
   7  -1   1   69.20    2.53 
   7  -1   1   70.89    2.40 
   7  -1   1   71.42    2.29 
   7  -1   1   70.27    2.18 
  -8   1  -1    0.85    0.11 
   8  -1   1    1.36    0.28 
   8  -1   1    0.74    0.15 
   8  -1   1    1.07    0.24 
   9  -1   1    1.19    0.30 
   9  -1   1    0.47    0.15 
   9  -1   1    0.84    0.25 
  10  -1   1    0.35    0.22 
  10  -1   1    0.44    0.25 
  10  -1   1    0.27    0.14 
  10   0  -1    0.24    0.20 
  10   0  -1   -0.23    0.21 
   9   0  -1    7.44    0.57 
   9   0  -1    7.05    0.63 
   9   0  -1    8.50    0.44 
   8   0  -1    1.32    0.32 
   8   0  -1    0.98    0.23 
   8   0  -1    0.81    0.15 
   7   0  -1    8.43    0.59 
   7   0  -1    7.98    0.51 
   7   0  -1    8.21    0.40 
   7   0  -1    8.36    0.39 
  -7   0   1    8.48    0.39 
  -7   0   1    8.16    0.35 
   6   0  -1    0.61    0.20 
   6   0  -1    0.59    0.09 
   6   0  -1    0.78    0.13 
   6   0  -1    0.81    0.18 
  -6   0   1    1.12    0.14 
   5   0  -1   22.90    0.89 
   5   0  -1   22.27    0.77 
   5   0  -1   22.70    0.99 
   5   0  -1   23.10    0.80 
  -5   0   1   24.96    0.78 
   4   0  -1   18.03    0.60 
   4   0  -1   16.89    0.67 
   4   0  -1   17.36    0.76 
   4   0  -1   16.98    0.58 
  -4   0   1   16.52    0.59 
  -4   0   1   17.13    0.58 
  -4   0   1   16.94    0.75 
  -4   0   1   18.82    0.65 
   3   0  -1    0.13    0.11 
   3   0  -1    0.11    0.04 
   3   0  -1    0.17    0.08 
   3   0  -1    0.12    0.05 
  -3   0   1    0.17    0.06 
  -3   0   1    0.27    0.12 
  -3   0   1    0.19    0.06 
  -3   0   1    0.14    0.04 
   2   0  -1    2.87    0.22 
   2   0  -1    2.94    0.18 
   2   0  -1    2.94    0.13 
   2   0  -1    3.17    0.14 
  -2   0   1    2.87    0.16 
  -2   0   1    3.18    0.14 
  -2   0   1    2.99    0.23 
   1   0  -1    6.97    0.31 
   1   0  -1    7.22    0.27 
   1   0  -1    7.12    0.24 
  -1   0   1    7.02    0.24 
  -1   0   1    7.34    0.27 
  -1   0   1    7.01    0.31 
   0   0  -1    5.23    0.18 
   0   0  -1    5.66    0.18 
   0   0  -1    5.03    0.18 
   0   0   1    5.77    0.18 
   0   0   1    6.01    0.20 
  -1   0  -1  148.74    4.32 
  -1   0  -1  150.02    4.01 
  -1   0  -1  121.36    4.26 
   1   0   1  140.66    4.02 
   1   0   1  124.02    4.28 
   1   0   1  152.44    4.31 
  -2   0  -1   58.82    1.69 
  -2   0  -1   57.29    1.79 
   2   0   1   57.34    1.81 
   2   0   1   58.69    1.80 
   2   0   1   57.31    1.69 
  -3   0  -1  447.88   12.38 
  -3   0  -1  385.23   13.29 
   3   0   1  456.58   12.38 
   3   0   1  448.30   13.31 
   3   0   1  430.46   13.31 
  -4   0  -1  184.55    5.15 
  -4   0  -1  175.20    5.49 
   4   0   1  183.75    5.16 
   4   0   1  171.74    5.54 
   4   0   1  181.19    5.89 
  -5   0  -1    0.04    0.03 
  -5   0  -1    0.20    0.06 
   5   0   1    0.01    0.11 
   5   0   1    0.11    0.05 
   5   0   1    0.21    0.09 
   5   0   1    0.04    0.06 
  -6   0  -1    2.27    0.17 
  -6   0  -1    2.43    0.15 
   6   0   1    2.21    0.17 
   6   0   1    2.74    0.20 
   6   0   1    2.39    0.30 
   6   0   1    2.00    0.23 
  -7   0  -1    2.36    0.16 
  -7   0  -1    2.26    0.19 
   7   0   1    2.73    0.35 
   7   0   1    2.10    0.27 
   7   0   1    2.51    0.21 
   7   0   1    2.54    0.19 
  -8   0  -1    1.24    0.13 
   8   0   1    1.12    0.28 
   8   0   1    1.21    0.16 
   8   0   1    1.50    0.20 
   8   0   1    1.83    0.28 
   9   0   1    3.71    0.30 
   9   0   1    3.92    0.49 
   9   0   1    3.85    0.43 
  10   0   1    1.12    0.27 
  10   0   1    1.38    0.23 
  10   0   1    0.78    0.28 
  10  -1  -1    4.10    0.54 
  10  -1  -1    4.42    0.40 
  10  -1  -1    4.69    0.56 
   9  -1  -1    0.19    0.21 
   9  -1  -1    0.56    0.16 
   9  -1  -1    0.53    0.25 
   8  -1  -1    0.56    0.14 
   8  -1  -1    0.44    0.20 
   8  -1  -1    0.42    0.22 
   7  -1  -1   -0.03    0.07 
   7  -1  -1    0.03    0.06 
   7  -1  -1   -0.08    0.16 
   7  -1  -1    0.06    0.14 
  -7   1   1    0.15    0.09 
  -7   1   1    0.07    0.06 
   6  -1  -1   18.49    0.88 
   6  -1  -1   19.59    0.83 
   6  -1  -1   19.83    0.71 
   6  -1  -1   18.50    0.69 
  -6   1   1   19.21    0.68 
  -6   1   1   18.92    0.69 
   5  -1  -1    0.04    0.11 
   5  -1  -1   -0.01    0.05 
   5  -1  -1   -0.03    0.04 
   5  -1  -1    0.01    0.09 
  -5   1   1    0.02    0.04 
  -5   1   1    0.08    0.06 
   4  -1  -1   26.92    0.89 
   4  -1  -1   27.07    1.01 
   4  -1  -1   28.97    0.93 
   4  -1  -1   27.14    1.08 
  -4   1   1   28.35    1.08 
  -4   1   1   26.87    0.91 
  -4   1   1   28.63    0.89 
  -4   1   1   28.18    0.97 
   3  -1  -1    5.48    0.22 
   3  -1  -1    5.16    0.28 
   3  -1  -1    5.18    0.23 
   3  -1  -1    4.85    0.30 
  -3   1   1    5.39    0.31 
  -3   1   1    5.18    0.23 
  -3   1   1    5.35    0.26 
  -3   1   1    5.20    0.22 
   2  -1  -1    1.72    0.17 
   2  -1  -1    2.06    0.11 
   2  -1  -1    1.81    0.11 
   2  -1  -1    2.10    0.17 
  -2   1   1    1.93    0.18 
  -2   1   1    1.99    0.10 
  -2   1   1    2.28    0.12 
  -2   1   1    2.15    0.15 
   1  -1  -1    0.98    0.07 
   1  -1  -1    1.17    0.07 
  -1   1   1    1.15    0.08 
  -1   1   1    1.24    0.12 
  -1   1   1    1.23    0.12 
  -1   1   1    1.11    0.07 
   0  -1  -1   39.59    1.14 
   0  -1  -1   39.30    1.23 
   0  -1  -1   40.46    1.22 
   0   1   1   39.14    1.14 
   0   1   1   38.28    1.22 
   0   1   1   39.82    1.24 
  -1  -1  -1   35.98    1.12 
  -1  -1  -1   35.33    1.06 
   1   1   1   36.06    1.13 
   1   1   1   35.91    1.13 
   1   1   1   35.56    1.06 
  -2  -1  -1    5.08    0.19 
  -2  -1  -1    5.23    0.19 
   2   1   1    5.03    0.19 
   2   1   1    5.19    0.19 
   2   1   1    5.24    0.20 
  -3  -1  -1   93.92    2.68 
  -3  -1  -1   93.56    2.87 
   3   1   1   92.86    2.88 
   3   1   1   93.45    2.86 
   3   1   1   90.59    2.69 
  -4  -1  -1    2.14    0.14 
  -4  -1  -1    2.23    0.14 
   4   1   1    2.30    0.16 
   4   1   1    2.16    0.14 
   4   1   1    2.20    0.13 
  -5  -1  -1    6.49    0.27 
  -5  -1  -1    6.91    0.29 
   5   1   1    6.40    0.29 
   5   1   1    6.93    0.34 
   5   1   1    7.18    0.29 
   5   1   1    6.71    0.43 
  -6  -1  -1   23.03    0.77 
  -6  -1  -1   22.87    0.77 
   6   1   1   23.90    0.81 
   6   1   1   21.77    0.86 
   6   1   1   22.06    1.00 
   6   1   1   22.95    0.79 
  -7  -1  -1    0.44    0.10 
  -7  -1  -1    0.59    0.08 
   7   1   1    0.52    0.12 
   7   1   1    0.23    0.13 
   7   1   1    0.50    0.22 
   7   1   1    0.49    0.10 
  -8  -1  -1   13.36    0.54 
  -8  -1  -1   12.78    0.50 
   8   1   1   13.09    0.66 
   8   1   1   14.82    0.81 
   8   1   1   12.72    0.56 
   9   1   1   15.48    0.91 
   9   1   1   16.02    0.67 
   9   1   1   15.26    0.78 
  10   1   1    0.15    0.18 
  10   1   1   -0.18    0.22 
  10   1   1    0.05    0.11 
  10  -2  -1    3.87    0.50 
  10  -2  -1    3.74    0.53 
  10  -2  -1    4.67    0.36 
   9  -2  -1    2.90    0.41 
   9  -2  -1    3.18    0.42 
   9  -2  -1    2.92    0.30 
   8  -2  -1    0.59    0.23 
   8  -2  -1    0.35    0.19 
   8  -2  -1    0.61    0.15 
  -8   2   1    0.53    0.11 
   7  -2  -1   10.55    0.48 
   7  -2  -1    9.69    0.59 
   7  -2  -1   10.92    0.61 
  -7   2   1   10.49    0.44 
   6  -2  -1   16.53    0.61 
   6  -2  -1   15.88    0.61 
   6  -2  -1   15.31    0.74 
   6  -2  -1   14.24    0.72 
  -6   2   1   15.42    0.59 
  -6   2   1   16.18    0.61 
   5  -2  -1    2.89    0.20 
   5  -2  -1    3.05    0.27 
   5  -2  -1    3.02    0.19 
   5  -2  -1    3.11    0.28 
  -5   2   1    2.92    0.18 
  -5   2   1    2.99    0.19 
  -5   2   1    3.08    0.28 
   4  -2  -1    0.13    0.07 
   4  -2  -1    0.03    0.09 
   4  -2  -1   -0.03    0.08 
   4  -2  -1    0.10    0.05 
  -4   2   1    0.12    0.07 
  -4   2   1   -0.12    0.08 
  -4   2   1    0.03    0.03 
  -4   2   1    0.10    0.06 
   3  -2  -1   34.26    1.22 
   3  -2  -1   33.73    1.05 
   3  -2  -1   33.79    1.10 
   3  -2  -1   33.30    1.18 
  -3   2   1   32.70    1.16 
  -3   2   1   35.47    1.23 
  -3   2   1   36.03    1.06 
  -3   2   1   33.10    1.10 
   2  -2  -1  116.16    3.48 
   2  -2  -1  119.30    3.78 
   2  -2  -1  125.03    3.72 
  -2   2   1  122.45    3.78 
  -2   2   1  121.17    3.72 
  -2   2   1  119.39    3.48 
  -2   2   1  123.27    3.95 
   1  -2  -1  427.45   13.29 
   1  -2  -1  401.99   13.35 
   1  -2  -1  474.37   12.42 
  -1   2   1  489.86   12.43 
  -1   2   1  394.18   13.32 
  -1   2   1  418.33   13.30 
   0  -2  -1    0.08    0.03 
   0  -2  -1    0.14    0.04 
   0  -2  -1    0.10    0.02 
   0   2   1    0.07    0.02 
   0   2   1    0.15    0.05 
   0   2   1    0.12    0.03 
  -1  -2  -1   77.87    2.32 
  -1  -2  -1   79.13    2.33 
   1   2   1   87.34    2.49 
   1   2   1   79.35    2.49 
   1   2   1   78.34    2.33 
   1   2   1   86.76    2.32 
  -2  -2  -1    1.10    0.07 
   2   2   1    1.07    0.07 
   2   2   1    1.10    0.08 
   2   2   1    1.07    0.06 
  -3  -2  -1  115.61    3.34 
  -3  -2  -1  107.65    3.13 
  -3  -2  -1  111.10    3.33 
   3   2   1  101.43    3.13 
   3   2   1  108.41    3.35 
   3   2   1  108.84    3.34 
  -4  -2  -1   86.17    2.63 
  -4  -2  -1   85.40    2.48 
  -4  -2  -1   85.87    2.62 
   4   2   1   83.97    2.67 
   4   2   1   82.17    2.48 
   4   2   1   87.52    2.64 
  -5  -2  -1   83.58    2.43 
  -5  -2  -1   84.32    2.55 
   5   2   1   81.50    2.44 
   5   2   1   80.80    2.90 
   5   2   1   80.29    2.62 
   5   2   1   84.52    2.59 
  -6  -2  -1   23.71    0.76 
  -6  -2  -1   23.31    0.77 
   6   2   1   21.78    1.03 
   6   2   1   22.96    0.80 
   6   2   1   21.67    0.85 
   6   2   1   23.59    0.78 
  -7  -2  -1   12.01    0.47 
  -7  -2  -1   11.13    0.42 
   7   2   1   12.07    0.48 
   7   2   1   11.40    0.70 
   7   2   1   12.15    0.48 
   7   2   1   11.06    0.54 
  -8  -2  -1    4.64    0.28 
   8   2   1    4.93    0.38 
   8   2   1    4.78    0.54 
   8   2   1    5.15    0.31 
   9   2   1    1.37    0.26 
   9   2   1    1.66    0.38 
   9   2   1    1.51    0.21 
  10   2   1    0.68    0.24 
  10   2   1    0.32    0.26 
  10  -3  -1    0.64    0.28 
  10  -3  -1    0.74    0.19 
   9  -3  -1    2.19    0.40 
   9  -3  -1    2.46    0.29 
   8  -3  -1    8.34    0.60 
   8  -3  -1    9.12    0.47 
  -8   3   1    8.78    0.42 
   7  -3  -1   16.91    0.82 
   7  -3  -1   16.62    0.67 
  -7   3   1   15.91    0.63 
   6  -3  -1    8.81    0.53 
   6  -3  -1    9.20    0.43 
  -6   3   1    9.27    0.40 
   5  -3  -1   44.88    1.39 
   5  -3  -1   40.18    1.47 
   5  -3  -1   37.23    1.28 
  -5   3   1   40.96    1.49 
  -5   3   1   39.82    1.29 
  -5   3   1   39.70    1.34 
   4  -3  -1  102.65    3.12 
   4  -3  -1   99.79    3.42 
   4  -3  -1  107.14    3.32 
  -4   3   1  105.93    3.39 
  -4   3   1  106.31    3.31 
  -4   3   1  107.02    3.55 
  -4   3   1  113.68    3.13 
   3  -3  -1   46.63    1.46 
   3  -3  -1   46.50    1.55 
   3  -3  -1   44.06    1.38 
  -3   3   1   45.10    1.53 
  -3   3   1   44.01    1.57 
  -3   3   1   43.81    1.45 
  -3   3   1   47.18    1.39 
   2  -3  -1  141.09    4.43 
   2  -3  -1  136.76    4.08 
   2  -3  -1  145.23    4.36 
  -2   3   1  139.15    4.36 
  -2   3   1  144.68    4.08 
  -2   3   1  144.32    4.43 
   1  -3  -1   66.63    1.96 
   1  -3  -1   69.74    2.08 
  -1   3   1   65.55    1.96 
  -1   3   1   68.58    2.15 
  -1   3   1   65.99    2.08 
   0  -3  -1   24.42    0.74 
   0  -3  -1   23.81    0.71 
   0  -3  -1   22.82    0.75 
   0   3   1   23.84    0.74 
   0   3   1   23.25    0.71 
   0   3   1   23.57    0.77 
  -1  -3  -1   22.47    0.67 
   1   3   1   22.49    0.70 
   1   3   1   22.88    0.70 
   1   3   1   22.29    0.67 
  -2  -3  -1   70.02    1.95 
   2   3   1   64.19    1.95 
   2   3   1   71.18    2.08 
   2   3   1   65.91    2.07 
  -3  -3  -1   13.53    0.43 
   3   3   1   13.28    0.43 
   3   3   1   13.92    0.44 
   3   3   1   13.28    0.45 
  -4  -3  -1    0.32    0.05 
   4   3   1    0.31    0.06 
   4   3   1    0.33    0.05 
  -5  -3  -1    2.42    0.14 
   5   3   1    2.40    0.14 
   5   3   1    2.39    0.15 
   5   3   1    2.40    0.17 
   5   3   1    2.57    0.32 
  -6  -3  -1   24.41    0.75 
  -6  -3  -1   23.19    0.78 
   6   3   1   23.42    1.10 
   6   3   1   24.06    0.82 
   6   3   1   23.85    0.87 
   6   3   1   23.67    0.80 
  -7  -3  -1    0.46    0.10 
   7   3   1    0.31    0.12 
   7   3   1    0.35    0.08 
   7   3   1    0.62    0.25 
   7   3   1    0.46    0.11 
   8   3   1   21.01    0.76 
   8   3   1   21.14    1.11 
   8   3   1   19.92    0.86 
   9   3   1    8.19    0.52 
   9   3   1    8.29    0.71 
  10   3   1    0.36    0.27 
  10   3   1   -0.21    0.14 
   9  -4  -1    6.49    0.43 
   9  -4  -1    7.06    0.68 
   8  -4  -1    0.37    0.13 
   8  -4  -1    0.39    0.19 
  -8   4   1    0.61    0.12 
   7  -4  -1    0.82    0.24 
   7  -4  -1    0.49    0.14 
  -7   4   1    0.52    0.10 
   6  -4  -1    7.46    0.49 
   6  -4  -1    7.53    0.39 
  -6   4   1    7.71    0.36 
   5  -4  -1   12.65    0.64 
   5  -4  -1   13.37    0.53 
  -5   4   1   13.56    0.60 
  -5   4   1   13.72    0.53 
   4  -4  -1   20.51    0.72 
   4  -4  -1   20.96    0.85 
  -4   4   1   20.61    0.82 
  -4   4   1   21.31    0.73 
  -4   4   1   21.12    0.81 
   3  -4  -1    8.69    0.44 
   3  -4  -1    8.79    0.36 
   3  -4  -1    8.73    0.35 
  -3   4   1    8.66    0.36 
  -3   4   1    9.23    0.36 
  -3   4   1    9.55    0.44 
  -3   4   1    8.94    0.39 
   2  -4  -1    1.17    0.11 
   2  -4  -1    1.34    0.10 
   2  -4  -1    1.24    0.16 
  -2   4   1    1.36    0.12 
  -2   4   1    0.98    0.14 
  -2   4   1    1.10    0.10 
   1  -4  -1    0.61    0.09 
   1  -4  -1    0.66    0.06 
   1  -4  -1    0.58    0.07 
  -1   4   1    0.70    0.07 
  -1   4   1    0.48    0.07 
  -1   4   1    0.47    0.09 
   0  -4  -1   34.29    1.06 
   0  -4  -1   37.51    1.10 
   0  -4  -1   35.84    1.10 
   0   4   1   36.47    1.06 
   0   4   1   36.24    1.12 
   0   4   1   34.37    1.16 
  -1  -4  -1    7.60    0.24 
   1   4   1    7.62    0.25 
   1   4   1    7.52    0.25 
   1   4   1    7.41    0.25 
  -2  -4  -1    0.93    0.06 
  -2  -4  -1    0.85    0.06 
  -3  -4  -1    1.13    0.07 
  -3  -4  -1    0.94    0.06 
   3   4   1    0.85    0.07 
   3   4   1    0.95    0.06 
   3   4   1    1.05    0.06 
   4   4   1    9.41    0.35 
   4   4   1    9.54    0.33 
   4   4   1    9.58    0.33 
  -5  -4  -1    5.04    0.21 
   5   4   1    4.94    0.21 
   5   4   1    4.76    0.24 
   5   4   1    4.68    0.22 
  -6  -4  -1  136.64    3.92 
   6   4   1  132.62    4.24 
   6   4   1  134.87    3.94 
   6   4   1  134.17    4.72 
   6   4   1  138.42    4.20 
  -7  -4  -1    0.03    0.05 
   7   4   1   -0.05    0.06 
   7   4   1   -0.03    0.19 
   7   4   1    0.08    0.05 
   7   4   1    0.09    0.10 
   8   4   1    0.00    0.10 
   8   4   1   -0.03    0.08 
   8   4   1    0.01    0.21 
   9   4   1   -0.17    0.12 
   9   4   1   -0.32    0.22 
  10   4   1    2.18    0.34 
   9  -5  -1   10.91    0.75 
   9  -5  -1    9.63    0.55 
   8  -5  -1    5.13    0.53 
   8  -5  -1    5.12    0.36 
  -8   5   1    5.66    0.33 
   7  -5  -1    1.80    0.23 
   7  -5  -1    1.73    0.32 
  -7   5   1    2.03    0.22 
   6  -5  -1   20.61    0.80 
   6  -5  -1   21.00    0.95 
  -6   5   1   21.70    0.79 
   5  -5  -1    3.77    0.37 
   5  -5  -1    2.86    0.23 
  -5   5   1    2.82    0.20 
  -5   5   1    2.89    0.24 
   4  -5  -1   19.55    0.81 
   4  -5  -1   18.71    0.68 
  -4   5   1   18.80    0.69 
  -4   5   1   19.92    0.79 
  -4   5   1   18.89    0.73 
   3  -5  -1    0.16    0.07 
   3  -5  -1    0.12    0.09 
  -3   5   1    0.17    0.08 
  -3   5   1    0.08    0.06 
  -3   5   1    0.16    0.05 
  -3   5   1    0.08    0.07 
   2  -5  -1    0.07    0.05 
   2  -5  -1    0.02    0.03 
  -2   5   1    0.06    0.07 
  -2   5   1    0.04    0.04 
  -2   5   1    0.03    0.05 
   1  -5  -1   24.99    0.80 
   1  -5  -1   26.30    0.82 
   1  -5  -1   25.31    0.85 
  -1   5   1   24.98    0.84 
  -1   5   1   26.13    0.92 
  -1   5   1   26.00    0.80 
   0  -5  -1   44.81    1.31 
   0   5   1   43.15    1.31 
   0   5   1   44.27    1.44 
   0   5   1   45.53    1.39 
  -1  -5  -1   13.88    0.44 
   1   5   1   14.91    0.46 
   1   5   1   14.42    0.45 
   1   5   1   14.41    0.48 
  -2  -5  -1    0.32    0.04 
  -2  -5  -1    0.26    0.03 
  -3  -5  -1    0.98    0.06 
  -3  -5  -1    0.94    0.05 
   3   5   1    0.93    0.05 
  -4  -5  -1   58.86    1.68 
  -4  -5  -1   57.59    1.68 
   4   5   1   57.25    1.69 
   4   5   1   59.20    1.80 
   4   5   1   57.70    1.81 
  -5  -5  -1    0.63    0.07 
   5   5   1    1.04    0.08 
   5   5   1    0.79    0.23 
   5   5   1    0.96    0.09 
  -6  -5  -1    1.18    0.11 
   6   5   1    1.26    0.12 
   6   5   1    1.05    0.12 
   6   5   1    1.14    0.14 
   6   5   1    1.52    0.34 
  -7  -5  -1    1.37    0.13 
   7   5   1    1.33    0.14 
   7   5   1    1.12    0.14 
   7   5   1    1.17    0.32 
   7   5   1    1.18    0.17 
   8   5   1   16.11    0.71 
   8   5   1   16.53    1.01 
   9   5   1    0.89    0.34 
   9   5   1    1.10    0.23 
   9  -6  -1    2.80    0.33 
   8  -6  -1    3.08    0.32 
   8  -6  -1    3.33    0.42 
  -8   6   1    3.72    0.27 
   7  -6  -1    6.22    0.51 
   6  -6  -1    0.01    0.14 
   6  -6  -1    0.06    0.10 
  -6   6   1    0.19    0.08 
   5  -6  -1   10.27    0.57 
   5  -6  -1    9.98    0.46 
  -5   6   1    9.65    0.45 
  -5   6   1   10.08    0.44 
   4  -6  -1    0.18    0.11 
   4  -6  -1    0.18    0.08 
  -4   6   1    0.07    0.09 
  -4   6   1    0.21    0.09 
  -4   6   1    0.03    0.05 
   3  -6  -1   48.83    1.55 
  -3   6   1   49.39    1.63 
  -3   6   1   52.44    1.74 
   2  -6  -1   32.91    1.05 
   2  -6  -1   33.92    1.15 
  -2   6   1   33.15    1.05 
  -2   6   1   34.24    1.20 
  -2   6   1   32.52    1.10 
   1  -6  -1   93.36    2.82 
   1  -6  -1   97.74    3.00 
  -1   6   1   95.20    3.01 
  -1   6   1  102.03    3.11 
  -1   6   1   97.34    2.83 
   0  -6  -1    0.43    0.06 
   0   6   1    0.40    0.06 
   0   6   1    0.36    0.08 
   0   6   1    0.37    0.05 
  -1  -6  -1    2.88    0.12 
  -1  -6  -1    2.98    0.13 
   1   6   1    2.81    0.13 
   1   6   1    2.79    0.14 
   1   6   1    2.82    0.12 
   4   6   1    0.04    0.03 
   4   6   1    0.14    0.04 
  -5  -6  -1    5.66    0.19 
  -5  -6  -1    5.26    0.20 
   5   6   1    5.57    0.22 
   5   6   1    5.14    0.24 
   5   6   1    5.43    0.49 
   5   6   1    5.60    0.21 
  -6  -6  -1    0.03    0.04 
   6   6   1   -0.03    0.04 
   6   6   1    0.07    0.07 
   6   6   1    0.02    0.20 
   6   6   1   -0.07    0.04 
   7   6   1    0.23    0.07 
   7   6   1    0.47    0.12 
   7   6   1   -0.17    0.20 
   8   6   1   43.25    1.91 
   8   6   1   40.89    1.47 
   9   6   1    1.69    0.24 
   8  -7  -1    0.90    0.21 
  -8   7   1    0.78    0.16 
   7  -7  -1    0.17    0.11 
  -7   7   1    0.13    0.10 
   6  -7  -1    0.17    0.16 
   6  -7  -1    0.67    0.15 
  -6   7   1    0.47    0.12 
   5  -7  -1    1.44    0.25 
   5  -7  -1    1.38    0.19 
  -5   7   1    1.60    0.16 
  -5   7   1    1.33    0.17 
   4  -7  -1  105.78    3.21 
   4  -7  -1  108.48    3.51 
  -4   7   1  110.90    3.53 
  -4   7   1  103.24    3.39 
  -4   7   1  109.24    3.54 
   3  -7  -1   15.54    0.64 
   3  -7  -1   15.04    0.57 
  -3   7   1   16.07    0.69 
  -3   7   1   15.02    0.58 
   2  -7  -1    6.20    0.29 
   2  -7  -1    6.20    0.28 
  -2   7   1    5.83    0.36 
  -2   7   1    5.62    0.27 
   1  -7  -1   69.43    2.07 
  -1   7   1   68.90    2.20 
  -1   7   1   71.69    2.31 
  -1   7   1   70.43    2.08 
   0  -7  -1   28.81    0.90 
   0   7   1   28.67    0.90 
   0   7   1   30.13    1.03 
   0   7   1   29.45    0.95 
  -1  -7  -1    0.72    0.07 
  -1  -7  -1    0.76    0.07 
   1   7   1    0.94    0.10 
   1   7   1    0.78    0.06 
   1   7   1    0.81    0.07 
   2   7   1    0.75    0.06 
   2   7   1    0.77    0.05 
   4   7   1    2.54    0.12 
   4   7   1    2.87    0.12 
   5   7   1    2.59    0.15 
   5   7   1    2.75    0.43 
   5   7   1    2.70    0.14 
   6   7   1   26.33    0.88 
   6   7   1   25.87    1.30 
  -7  -7  -1   15.39    0.47 
   7   7   1   14.54    0.96 
   7   7   1   14.82    0.61 
  -8  -7  -1    6.82    0.26 
   8   7   1    6.01    0.38 
   8  -8  -1    0.40    0.18 
  -8   8   1    0.64    0.16 
   7  -8  -1    1.22    0.22 
  -7   8   1    1.21    0.19 
   6  -8  -1    0.17    0.12 
  -6   8   1   -0.07    0.07 
   5  -8  -1    0.42    0.13 
  -5   8   1    0.53    0.11 
   4  -8  -1    2.04    0.21 
   4  -8  -1    2.22    0.25 
  -4   8   1    1.78    0.27 
  -4   8   1    2.22    0.18 
  -4   8   1    1.97    0.17 
   3  -8  -1   37.29    1.28 
   3  -8  -1   36.67    1.20 
  -3   8   1   35.98    1.24 
  -3   8   1   36.66    1.36 
   2  -8  -1    0.51    0.08 
   2  -8  -1    0.38    0.09 
  -2   8   1    0.26    0.07 
  -2   8   1    0.52    0.14 
   1  -8  -1    1.75    0.14 
  -1   8   1    1.61    0.12 
  -1   8   1    1.68    0.21 
   0  -8  -1   36.64    1.12 
   0   8   1   36.07    1.19 
   0   8   1   36.72    1.13 
   0   8   1   38.33    1.29 
  -1  -8  -1   18.43    0.58 
  -1  -8  -1   18.94    0.59 
   1   8   1   18.94    0.59 
   1   8   1   18.87    0.62 
   1   8   1   19.47    0.69 
   2   8   1    1.44    0.08 
   2   8   1    1.53    0.11 
   4   8   1    0.14    0.04 
   4   8   1    0.06    0.03 
   5   8   1    0.30    0.24 
   5   8   1    0.55    0.07 
   5   8   1    0.46    0.07 
   6   8   1    3.43    0.53 
   6   8   1    4.04    0.20 
   7   8   1    0.03    0.25 
   7   8   1    0.10    0.10 
   8   8   1    0.33    0.14 
   7  -9  -1    2.19    0.27 
  -7   9   1    3.04    0.26 
   6  -9  -1   13.99    0.64 
  -6   9   1   13.99    0.62 
   5  -9  -1    0.92    0.17 
  -5   9   1    0.64    0.12 
   4  -9  -1    0.30    0.11 
  -4   9   1    0.37    0.10 
   3  -9  -1    1.53    0.18 
  -3   9   1    1.07    0.13 
   2  -9  -1   38.36    1.24 
  -2   9   1   38.15    1.29 
  -2   9   1   39.42    1.42 
   1  -9  -1    1.92    0.15 
  -1   9   1    1.80    0.14 
  -1   9   1    2.46    0.26 
   0  -9  -1    3.68    0.19 
   0   9   1    3.83    0.19 
   0   9   1    3.66    0.28 
  -1  -9  -1    7.78    0.27 
  -1  -9  -1    8.03    0.28 
   1   9   1    7.68    0.28 
   1   9   1    7.68    0.30 
   1   9   1    8.42    0.38 
   2   9   1   14.16    0.52 
   2   9   1   13.43    0.46 
   3   9   1    2.43    0.11 
   3   9   1    2.51    0.13 
   4   9   1    2.26    0.12 
   4   9   1    2.76    0.43 
   5   9   1    2.39    0.45 
   5   9   1    2.56    0.13 
   5   9   1    2.20    0.13 
   6   9   1   -0.03    0.27 
   6   9   1    0.02    0.05 
   7   9   1    0.21    0.10 
   6 -10  -1    1.07    0.20 
  -6  10   1    1.95    0.24 
   5 -10  -1    4.35    0.32 
  -5  10   1    4.48    0.30 
   4 -10  -1    0.84    0.16 
  -4  10   1    1.08    0.16 
   3 -10  -1    0.32    0.11 
  -3  10   1    0.23    0.08 
   2 -10  -1    0.53    0.11 
  -2  10   1    0.47    0.10 
   1 -10  -1   37.75    1.19 
  -1  10   1   37.27    1.25 
   0 -10  -1   13.60    0.48 
   0  10   1   13.36    0.61 
   0  10   1   13.74    0.50 
  -1 -10  -1   17.85    0.53 
  -1 -10  -1   17.15    0.53 
   1  10   1   16.61    0.55 
   1  10   1   17.01    0.60 
   1  10   1   17.53    0.70 
   2  10   1    0.45    0.11 
   2  10   1    0.45    0.06 
   3  10   1   -0.17    0.18 
   3  10   1    0.13    0.04 
   3  10   1    0.21    0.07 
   4  10   1    1.20    0.33 
   5  10   1    1.27    0.10 
   5  10   1    0.55    0.31 
   5  10   1    1.15    0.09 
   5 -11  -1    0.21    0.12 
  -5  11   1    0.01    0.09 
   4 -11  -1    1.67    0.21 
  -4  11   1    1.61    0.19 
   3 -11  -1   17.67    0.69 
  -3  11   1   17.34    0.69 
   2 -11  -1    2.03    0.20 
  -2  11   1    1.57    0.16 
   1 -11  -1    6.72    0.31 
  -1  11   1    6.49    0.31 
   0 -11  -1    1.68    0.13 
   0  11   1    1.71    0.14 
   1  11   1    3.33    0.18 
   1  11   1    3.89    0.46 
   2  11   1   15.01    0.87 
   2  11   1   13.54    0.49 
   2  11   1   14.13    0.58 
   3  11   1    0.47    0.06 
   3  11   1    0.38    0.26 
   3  11   1    0.48    0.11 
   4  11   1    0.12    0.25 
   4  11   1    0.28    0.08 
   3 -12  -1    2.73    0.26 
  -3  12   1    3.00    0.24 
   2 -12  -1    0.03    0.08 
  -2  12   1    0.09    0.07 
   1 -12  -1    4.66    0.25 
  -1  12   1    4.37    0.26 
   0 -12  -1   11.06    0.39 
   0  12   1   10.90    0.45 
   1  12   1    1.48    0.14 
   1  12   1    1.30    0.33 
   2  12   1    1.37    0.35 
   2  12   1    1.26    0.11 
   3  12   1   12.54    0.87 
   3  12   1   12.95    0.46 
   2  11  -2    0.26    0.05 
   2  11  -2    0.04    0.23 
   1  11  -2   -0.04    0.20 
   1  11  -2    0.00    0.05 
   0  11  -2   -0.02    0.05 
  -1  11  -2    8.32    0.37 
   1 -11   2    8.78    0.33 
  -2  11  -2    0.34    0.10 
   2 -11   2    0.33    0.10 
  -3  11  -2    0.07    0.08 
   3 -11   2    0.10    0.09 
  -4  11  -2    6.44    0.36 
   4 -11   2    7.02    0.38 
   4  10  -2    1.19    0.34 
   3  10  -2    0.06    0.22 
   2  10  -2    0.16    0.20 
   2  10  -2    0.05    0.04 
   2  10  -2   -0.02    0.05 
   1  10  -2    6.83    0.32 
   1  10  -2    7.66    0.57 
   1  10  -2    6.77    0.28 
   0  10  -2    1.82    0.14 
   0  10  -2    1.67    0.19 
   0  10  -2    1.90    0.31 
  -1  10  -2   33.06    1.12 
  -1  10  -2   33.62    1.33 
   1 -10   2   33.20    1.04 
  -2  10  -2    4.01    0.24 
   2 -10   2    4.30    0.25 
  -3  10  -2    0.12    0.08 
   3 -10   2    0.16    0.09 
  -4  10  -2    0.89    0.15 
   4 -10   2    0.81    0.15 
  -5  10  -2    0.20    0.10 
   5 -10   2    0.32    0.13 
  -6  10  -2    1.69    0.22 
   6 -10   2    1.83    0.25 
   5   9  -2    8.13    0.74 
   4   9  -2   -0.01    0.19 
   3   9  -2   36.66    1.64 
   2   9  -2   21.11    1.07 
   1   9  -2   24.07    0.81 
   1   9  -2   22.67    1.09 
   1   9  -2   23.26    0.78 
   0   9  -2    9.01    0.32 
   0   9  -2    9.91    0.59 
   0   9  -2    9.99    0.42 
   0   9  -2    9.52    0.37 
  -1   9  -2   10.47    0.55 
  -1   9  -2    9.71    0.45 
  -1   9  -2    9.33    0.39 
   1  -9   2    9.74    0.37 
  -2   9  -2    0.83    0.12 
  -2   9  -2    0.96    0.17 
  -2   9  -2    1.07    0.17 
   2  -9   2    0.62    0.11 
  -3   9  -2    0.55    0.11 
   3  -9   2    0.40    0.11 
  -4   9  -2    1.54    0.18 
   4  -9   2    1.53    0.19 
  -5   9  -2    0.43    0.11 
   5  -9   2    0.34    0.13 
  -6   9  -2    9.73    0.47 
   6  -9   2    9.24    0.50 
  -7   9  -2    8.82    0.47 
   7  -9   2    8.71    0.50 
   6   8  -2    0.62    0.15 
   5   8  -2    5.74    0.22 
   5   8  -2    5.67    0.28 
   5   8  -2    6.56    0.69 
   4   8  -2    2.59    0.42 
   3   8  -2    1.71    0.35 
   2   8  -2    5.70    0.50 
   1   8  -2    3.17    0.17 
   1   8  -2    4.12    0.43 
   1   8  -2    3.13    0.15 
   0   8  -2   36.64    1.24 
   0   8  -2   38.32    1.15 
   0   8  -2   39.33    1.51 
   0   8  -2   40.43    1.29 
   0  -8   2   38.92    1.15 
  -1   8  -2    9.93    0.43 
  -1   8  -2    9.25    0.37 
  -1   8  -2    9.30    0.50 
   1  -8   2    9.31    0.36 
  -2   8  -2    1.38    0.14 
  -2   8  -2    1.57    0.19 
  -2   8  -2    1.24    0.17 
   2  -8   2    1.40    0.15 
  -3   8  -2   10.47    0.51 
  -3   8  -2   10.74    0.45 
   3  -8   2   10.89    0.45 
  -4   8  -2    3.44    0.23 
   4  -8   2    3.42    0.25 
  -5   8  -2    1.66    0.18 
   5  -8   2    2.06    0.23 
  -6   8  -2   14.07    0.61 
   6  -8   2   15.10    0.65 
  -7   8  -2    3.31    0.27 
   7  -8   2    3.32    0.33 
  -8   8  -2    0.50    0.15 
   8  -8   2    0.38    0.16 
   7   7  -2    0.09    0.12 
   6   7  -2    0.14    0.26 
   6   7  -2   -0.03    0.09 
   5   7  -2    4.54    0.19 
   5   7  -2    4.05    0.24 
   5   7  -2    3.89    0.51 
   4   7  -2    0.36    0.07 
   4   7  -2    0.39    0.05 
   4   7  -2    0.22    0.20 
   3   7  -2    5.55    0.57 
   2   7  -2   10.76    0.66 
   1   7  -2   46.77    1.46 
   1   7  -2   45.21    1.44 
   1   7  -2   46.66    1.78 
   0   7  -2    3.55    0.35 
   0   7  -2    3.10    0.14 
   0   7  -2    3.00    0.18 
   0   7  -2    3.18    0.16 
   0  -7   2    2.88    0.14 
  -1   7  -2   39.45    1.41 
  -1   7  -2   38.01    1.27 
  -1   7  -2   38.28    1.15 
  -1   7  -2   36.49    1.23 
   1  -7   2   37.60    1.16 
  -2   7  -2    0.20    0.09 
  -2   7  -2    0.39    0.08 
  -2   7  -2    0.38    0.10 
   2  -7   2    0.63    0.10 
  -3   7  -2    2.44    0.22 
  -3   7  -2    1.96    0.16 
   3  -7   2    1.89    0.16 
   3  -7   2    2.26    0.20 
  -4   7  -2    3.48    0.23 
  -4   7  -2    3.94    0.30 
   4  -7   2    4.17    0.29 
   4  -7   2    3.36    0.24 
  -5   7  -2    2.90    0.22 
  -5   7  -2    2.81    0.30 
   5  -7   2    3.62    0.34 
   5  -7   2    2.98    0.27 
  -6   7  -2    2.49    0.21 
   6  -7   2    2.11    0.23 
  -7   7  -2    0.35    0.12 
   7  -7   2    0.41    0.15 
  -8   7  -2    0.70    0.16 
   8  -7   2    0.66    0.19 
  -9   7  -2    1.60    0.22 
   9  -7   2    1.19    0.23 
   8   6  -2    0.68    0.21 
   7   6  -2    6.38    0.41 
   7   6  -2    6.13    0.70 
   6   6  -2    1.76    0.13 
   6   6  -2    1.84    0.21 
   6   6  -2    2.51    0.45 
   5   6  -2    0.00    0.21 
   5   6  -2    0.07    0.04 
   5   6  -2    0.05    0.08 
   4   6  -2   -0.02    0.05 
   4   6  -2   -0.01    0.03 
   4   6  -2    0.16    0.20 
   3   6  -2    4.10    0.44 
   2   6  -2    1.34    0.26 
   1   6  -2    6.92    0.46 
   0   6  -2    0.30    0.05 
   0   6  -2    0.25    0.05 
   0   6  -2    0.25    0.13 
   0   6  -2    0.26    0.07 
   0  -6   2    0.17    0.05 
  -1   6  -2   84.91    2.67 
  -1   6  -2   83.06    2.63 
  -1   6  -2   86.53    2.86 
  -1   6  -2   83.57    2.46 
   1  -6   2   84.19    2.47 
  -2   6  -2   98.33    3.22 
  -2   6  -2   92.62    3.05 
  -2   6  -2  100.19    2.86 
  -2   6  -2  101.90    3.11 
   2  -6   2   95.92    2.87 
  -3   6  -2    3.44    0.24 
  -3   6  -2    3.16    0.19 
   3  -6   2    3.00    0.22 
   3  -6   2    2.85    0.20 
  -4   6  -2    0.12    0.07 
  -4   6  -2   -0.08    0.07 
   4  -6   2   -0.05    0.08 
   4  -6   2    0.07    0.08 
  -5   6  -2    1.44    0.16 
  -5   6  -2    1.42    0.22 
   5  -6   2    1.46    0.19 
   5  -6   2    1.14    0.20 
  -6   6  -2    0.82    0.13 
   6  -6   2    0.89    0.21 
   6  -6   2    1.12    0.18 
  -7   6  -2    0.05    0.08 
   7  -6   2   -0.16    0.12 
   7  -6   2    0.07    0.11 
  -8   6  -2    2.66    0.23 
   8  -6   2    2.54    0.29 
  -9   6  -2   16.34    0.72 
   9  -6   2   17.35    0.78 
   8   5  -2    0.12    0.15 
   7   5  -2    0.00    0.27 
   7   5  -2    0.35    0.14 
   6   5  -2   -0.01    0.10 
   6   5  -2   -0.27    0.20 
   6   5  -2    0.03    0.05 
   5   5  -2   24.98    0.81 
   5   5  -2   23.53    0.88 
   5   5  -2   26.04    1.23 
   5   5  -2   24.45    0.76 
  -5  -5   2   24.39    0.75 
   4   5  -2    1.78    0.09 
   4   5  -2    1.66    0.31 
   4   5  -2    1.83    0.15 
   4   5  -2    1.87    0.10 
   4   5  -2    1.98    0.10 
  -4  -5   2    1.81    0.09 
   3   5  -2    0.51    0.05 
   3   5  -2    0.58    0.07 
   3   5  -2    0.52    0.20 
   2   5  -2   33.02    1.34 
   1   5  -2  157.26    4.53 
   1   5  -2  160.18    4.52 
   1   5  -2  161.64    5.34 
   0   5  -2   37.93    1.22 
   0   5  -2   38.54    1.14 
   0   5  -2   38.41    1.42 
   0   5  -2   39.35    1.23 
   0  -5   2   38.55    1.14 
  -1   5  -2    0.28    0.06 
  -1   5  -2    0.29    0.06 
  -1   5  -2    0.31    0.07 
  -1   5  -2    0.39    0.11 
   1  -5   2    0.30    0.06 
  -2   5  -2   45.79    1.51 
  -2   5  -2   46.15    1.36 
  -2   5  -2   41.83    1.44 
  -2   5  -2   45.88    1.49 
   2  -5   2   46.16    1.46 
   2  -5   2   43.97    1.37 
  -3   5  -2    1.47    0.13 
  -3   5  -2    1.43    0.16 
  -3   5  -2    1.38    0.14 
   3  -5   2    1.18    0.15 
   3  -5   2    1.40    0.14 
  -4   5  -2    0.93    0.15 
  -4   5  -2    0.94    0.12 
   4  -5   2    1.02    0.17 
   4  -5   2    0.45    0.10 
  -5   5  -2    3.04    0.25 
  -5   5  -2    2.83    0.20 
   5  -5   2    2.91    0.23 
   5  -5   2    2.06    0.24 
  -6   5  -2   11.12    0.49 
   6  -5   2   12.09    0.52 
   6  -5   2   10.89    0.59 
  -7   5  -2   16.06    0.64 
   7  -5   2   15.86    0.79 
   7  -5   2   15.67    0.68 
  -8   5  -2   16.61    0.68 
   8  -5   2   16.03    0.85 
   8  -5   2   17.07    0.73 
  -9   5  -2   27.22    1.04 
   9  -5   2   27.61    1.08 
   9  -5   2   27.82    1.26 
  10  -5   2    7.06    0.48 
   9   4  -2    6.05    0.51 
   8   4  -2    1.09    0.24 
   8   4  -2    0.65    0.33 
   7   4  -2    2.05    0.44 
   7   4  -2    2.08    0.27 
   6   4  -2    2.31    0.25 
   6   4  -2    2.94    0.17 
   6   4  -2    2.82    0.45 
   6   4  -2    2.84    0.18 
  -6  -4   2    2.70    0.17 
   5   4  -2    0.12    0.05 
   5   4  -2    0.09    0.09 
   5   4  -2    0.49    0.24 
   5   4  -2    0.11    0.05 
  -5  -4   2   -0.01    0.04 
   4   4  -2   -0.03    0.15 
   4   4  -2    0.05    0.03 
   4   4  -2    0.03    0.03 
   4   4  -2    0.00    0.06 
  -4  -4   2    0.04    0.03 
   3   4  -2   12.91    0.69 
   3   4  -2   12.10    0.41 
   3   4  -2   11.90    0.44 
   3   4  -2   12.16    0.39 
  -3  -4   2   12.57    0.39 
   2   4  -2    5.35    0.18 
   2   4  -2    5.46    0.39 
   2   4  -2    5.41    0.18 
   1   4  -2    1.99    0.24 
   1   4  -2    1.94    0.09 
   1   4  -2    1.75    0.08 
   0   4  -2    0.85    0.08 
   0   4  -2    0.80    0.07 
   0   4  -2    0.90    0.15 
   0   4  -2    0.99    0.08 
   0  -4   2    1.02    0.08 
  -1   4  -2   69.70    2.17 
  -1   4  -2   70.56    2.31 
  -1   4  -2   68.30    2.15 
  -1   4  -2   68.72    2.01 
   1  -4   2   66.64    2.01 
  -2   4  -2    3.05    0.16 
  -2   4  -2    2.96    0.16 
  -2   4  -2    3.23    0.19 
   2  -4   2    2.95    0.16 
   2  -4   2    3.17    0.18 
   2  -4   2    2.88    0.18 
  -3   4  -2    1.09    0.11 
  -3   4  -2    1.43    0.14 
  -3   4  -2    1.37    0.14 
   3  -4   2    1.29    0.14 
  -4   4  -2    8.38    0.39 
  -4   4  -2    7.45    0.33 
  -4   4  -2    8.50    0.35 
   4  -4   2    7.49    0.39 
   4  -4   2    7.46    0.34 
  -5   4  -2    4.86    0.26 
  -5   4  -2    5.14    0.32 
   5  -4   2    5.12    0.34 
   5  -4   2    5.06    0.29 
  -6   4  -2    2.32    0.18 
   6  -4   2    2.37    0.28 
   6  -4   2    2.65    0.25 
  -7   4  -2    0.00    0.07 
   7  -4   2   -0.01    0.14 
   7  -4   2   -0.06    0.09 
  -8   4  -2    2.64    0.22 
   8  -4   2    2.57    0.28 
   8  -4   2    3.27    0.40 
  -9   4  -2   11.88    0.53 
   9  -4   2   12.16    0.60 
   9  -4   2   10.28    0.70 
  10  -4   2    0.09    0.20 
  10  -4   2    0.39    0.17 
   9   3  -2    0.60    0.23 
   8   3  -2    6.40    0.72 
   8   3  -2    5.36    0.45 
   7   3  -2    4.44    0.57 
   7   3  -2    4.38    0.26 
   7   3  -2    3.63    0.36 
   6   3  -2    4.12    0.22 
   6   3  -2    4.03    0.22 
   6   3  -2    3.67    0.49 
   6   3  -2    3.68    0.31 
  -6  -3   2    3.90    0.22 
   5   3  -2    3.09    0.25 
   5   3  -2    3.26    0.17 
   5   3  -2    2.99    0.17 
   5   3  -2    2.93    0.39 
  -5  -3   2    3.27    0.18 
   4   3  -2   15.18    0.80 
   4   3  -2   15.93    0.53 
   4   3  -2   15.32    0.59 
   4   3  -2   15.28    0.51 
  -4  -3   2   15.97    0.52 
   3   3  -2    0.29    0.16 
   3   3  -2    0.29    0.05 
   3   3  -2    0.20    0.04 
   3   3  -2    0.26    0.07 
   2   3  -2    1.57    0.08 
   2   3  -2    1.54    0.08 
   2   3  -2    1.69    0.11 
   2   3  -2    1.33    0.21 
   2   3  -2    1.68    0.09 
  -2  -3   2    1.21    0.08 
  -2  -3   2    1.35    0.20 
   1   3  -2   21.49    0.84 
   1   3  -2   20.47    0.65 
   1   3  -2   19.70    0.61 
   1   3  -2   20.00    0.61 
  -1  -3   2   20.04    0.82 
   0   3  -2    4.33    0.17 
   0   3  -2    4.41    0.18 
   0   3  -2    4.45    0.27 
   0   3  -2    3.96    0.17 
   0  -3   2    4.64    0.27 
   0  -3   2    4.24    0.17 
  -1   3  -2   84.15    2.59 
  -1   3  -2   85.31    2.76 
  -1   3  -2   85.45    2.60 
  -1   3  -2   81.90    2.42 
   1  -3   2   81.33    2.76 
   1  -3   2   84.26    2.58 
   1  -3   2   84.86    2.59 
   1  -3   2   81.68    2.42 
  -2   3  -2  125.77    3.88 
  -2   3  -2  120.84    3.86 
  -2   3  -2  129.29    3.61 
   2  -3   2  124.05    3.61 
   2  -3   2  125.26    4.03 
   2  -3   2  124.65    3.86 
  -3   3  -2   30.29    1.03 
  -3   3  -2   29.78    0.95 
  -3   3  -2   29.89    0.99 
   3  -3   2   29.82    1.03 
   3  -3   2   28.98    0.95 
   3  -3   2   30.41    1.00 
  -4   3  -2   36.43    1.20 
  -4   3  -2   32.99    1.15 
  -4   3  -2   35.47    1.11 
   4  -3   2   33.57    1.11 
   4  -3   2   35.47    1.22 
  -5   3  -2   70.42    2.18 
  -5   3  -2   68.61    2.07 
  -5   3  -2   67.01    2.23 
   5  -3   2   66.16    2.08 
   5  -3   2   69.76    2.27 
   5  -3   2   66.73    2.25 
  -6   3  -2    5.64    0.28 
   6  -3   2    5.58    0.38 
   6  -3   2    4.92    0.31 
   6  -3   2    5.23    0.29 
  -7   3  -2    0.58    0.11 
   7  -3   2    0.65    0.14 
   7  -3   2    0.52    0.14 
   7  -3   2    0.41    0.18 
  -8   3  -2   -0.04    0.05 
   8  -3   2    0.06    0.10 
   8  -3   2    0.15    0.12 
   8  -3   2    0.15    0.17 
  -9   3  -2   13.05    0.55 
   9  -3   2   10.95    0.71 
   9  -3   2   12.76    0.64 
   9  -3   2   11.85    0.59 
  10  -3   2   11.59    0.60 
  10  -3   2   10.66    0.72 
   9   2  -2    3.80    0.44 
   9   2  -2    5.94    0.70 
   8   2  -2    7.02    0.64 
   8   2  -2    6.09    0.34 
   8   2  -2    5.28    0.46 
   7   2  -2   30.76    1.42 
   7   2  -2   30.92    1.02 
   7   2  -2   28.87    1.18 
  -7  -2   2   29.84    1.01 
   6   2  -2    3.54    0.46 
   6   2  -2    2.93    0.20 
   6   2  -2    3.12    0.19 
  -6  -2   2    3.14    0.20 
   5   2  -2   20.58    0.72 
   5   2  -2   22.46    1.02 
   5   2  -2   19.96    0.81 
   5   2  -2   21.56    0.70 
  -5  -2   2   20.88    0.70 
  -5  -2   2   21.06    0.67 
   4   2  -2   22.06    0.71 
   4   2  -2   20.13    0.95 
   4   2  -2   20.59    0.78 
   4   2  -2   20.50    0.68 
  -4  -2   2   21.61    0.68 
   3   2  -2   31.11    0.98 
   3   2  -2   31.16    1.03 
   3   2  -2   30.62    1.22 
   3   2  -2   29.72    0.92 
  -3  -2   2   30.65    0.93 
  -3  -2   2   29.31    1.21 
   2   2  -2    2.03    0.14 
   2   2  -2    1.95    0.10 
   2   2  -2    1.79    0.23 
   2   2  -2    2.12    0.10 
  -2  -2   2    2.01    0.25 
  -2  -2   2    1.74    0.10 
   1   2  -2  163.97    5.63 
   1   2  -2  165.27    5.25 
   1   2  -2  171.48    4.89 
   1   2  -2  185.92    5.25 
   1   2  -2  172.83    4.88 
  -1  -2   2  171.19    4.88 
  -1  -2   2  171.39    5.64 
   0   2  -2   30.01    1.08 
   0   2  -2   29.88    0.89 
   0   2  -2   29.82    0.96 
   0   2  -2   30.42    0.90 
   0  -2   2   31.13    0.90 
   0  -2   2   29.71    1.08 
  -1   2  -2   46.35    1.50 
  -1   2  -2   49.99    1.51 
  -1   2  -2   45.97    1.40 
   1  -2   2   48.34    1.50 
   1  -2   2   46.39    1.41 
   1  -2   2   49.00    1.50 
   1  -2   2   48.34    1.60 
  -2   2  -2   23.14    0.75 
  -2   2  -2   24.32    0.81 
  -2   2  -2   23.09    0.79 
   2  -2   2   24.43    0.81 
   2  -2   2   24.93    0.80 
   2  -2   2   23.47    0.76 
  -3   2  -2   91.66    2.91 
  -3   2  -2   98.57    2.71 
  -3   2  -2   88.90    2.88 
   3  -2   2   88.54    2.71 
   3  -2   2   89.91    2.91 
   3  -2   2   97.55    2.89 
  -4   2  -2    1.78    0.16 
  -4   2  -2    1.75    0.13 
  -4   2  -2    1.91    0.15 
   4  -2   2    2.04    0.15 
   4  -2   2    2.04    0.19 
   4  -2   2    1.80    0.16 
  -5   2  -2   97.71    3.14 
  -5   2  -2   97.71    2.92 
  -5   2  -2   98.25    3.10 
   5  -2   2   99.18    3.28 
   5  -2   2   97.10    2.93 
   5  -2   2  102.06    3.12 
   5  -2   2   98.15    3.17 
  -6   2  -2    3.22    0.20 
  -6   2  -2    3.09    0.21 
   6  -2   2    3.57    0.26 
   6  -2   2    3.20    0.24 
   6  -2   2    3.43    0.29 
  -7   2  -2    3.07    0.21 
   7  -2   2    3.69    0.36 
   7  -2   2    3.10    0.25 
   7  -2   2    3.93    0.31 
  -8   2  -2    0.75    0.13 
   8  -2   2    0.60    0.14 
   8  -2   2    0.84    0.20 
  -9   2  -2    0.92    0.15 
   9  -2   2    0.64    0.16 
   9  -2   2    1.17    0.27 
   9  -2   2    0.70    0.22 
  10  -2   2    1.88    0.28 
  10  -2   2    1.51    0.33 
  10  -2   2    1.49    0.30 
   9   1  -2   10.80    0.69 
   9   1  -2   11.05    0.82 
   8   1  -2    1.22    0.17 
   8   1  -2    0.85    0.31 
   8   1  -2    1.22    0.26 
   7   1  -2   42.79    1.82 
   7   1  -2   43.97    1.41 
   7   1  -2   42.21    1.62 
  -7  -1   2   45.20    1.41 
   6   1  -2   13.08    0.77 
   6   1  -2   12.24    0.62 
   6   1  -2   13.99    0.52 
   6   1  -2   13.71    0.52 
  -6  -1   2   13.53    0.52 
  -6  -1   2   12.88    0.48 
   5   1  -2    3.01    0.28 
   5   1  -2    2.79    0.18 
   5   1  -2    3.16    0.39 
   5   1  -2    2.73    0.17 
  -5  -1   2    3.12    0.19 
  -5  -1   2    2.81    0.15 
   4   1  -2    0.08    0.15 
   4   1  -2    0.09    0.09 
   4   1  -2    0.13    0.05 
   4   1  -2    0.08    0.05 
  -4  -1   2    0.02    0.05 
  -4  -1   2    0.05    0.03 
  -4  -1   2   -0.05    0.11 
   3   1  -2    3.64    0.23 
   3   1  -2    4.87    0.35 
   3   1  -2    3.79    0.18 
   3   1  -2    4.28    0.18 
  -3  -1   2    3.98    0.16 
  -3  -1   2    3.98    0.19 
  -3  -1   2    4.04    0.32 
  -3  -1   2    3.93    0.18 
   2   1  -2    0.14    0.07 
   2   1  -2    0.25    0.12 
   2   1  -2    0.31    0.05 
   2   1  -2    0.26    0.05 
  -2  -1   2    0.18    0.05 
  -2  -1   2    0.23    0.11 
  -2  -1   2    0.22    0.05 
  -2  -1   2    0.17    0.03 
   1   1  -2  207.53    6.44 
   1   1  -2  211.12    6.86 
   1   1  -2  200.68    6.03 
   1   1  -2  210.17    6.45 
  -1  -1   2  224.29    6.45 
  -1  -1   2  222.57    6.45 
  -1  -1   2  207.48    6.86 
  -1  -1   2  200.91    6.03 
   0   1  -2   52.87    1.66 
   0   1  -2   53.63    1.64 
   0   1  -2   54.65    1.54 
   0   1  -2   51.39    1.79 
   0   1  -2   52.35    1.54 
   0  -1   2   51.46    1.79 
   0  -1   2   52.93    1.54 
   0  -1   2   52.88    1.64 
   0  -1   2   52.57    1.53 
   0  -1   2   54.84    1.66 
  -1   1  -2  411.41   10.59 
  -1   1  -2  329.13   11.27 
  -1   1  -2  383.21   11.33 
   1  -1   2  362.16   10.57 
   1  -1   2  358.61   11.33 
  -2   1  -2   16.19    0.57 
  -2   1  -2   17.32    0.55 
   2  -1   2   17.11    0.57 
   2  -1   2   17.35    0.58 
   2  -1   2   16.17    0.55 
  -3   1  -2   38.84    1.31 
  -3   1  -2   41.24    1.25 
  -3   1  -2   42.65    1.33 
   3  -1   2   40.96    1.32 
   3  -1   2   41.72    1.34 
   3  -1   2   40.04    1.25 
  -4   1  -2   57.03    1.80 
  -4   1  -2   57.62    1.83 
   4  -1   2   58.49    1.82 
   4  -1   2   55.28    1.85 
   4  -1   2   55.03    1.71 
  -5   1  -2    4.02    0.21 
  -5   1  -2    4.12    0.23 
   5  -1   2    3.96    0.23 
   5  -1   2    3.79    0.28 
   5  -1   2    4.48    0.23 
   5  -1   2    3.68    0.26 
  -6   1  -2    0.01    0.05 
  -6   1  -2   -0.03    0.06 
   6  -1   2    0.01    0.11 
   6  -1   2   -0.09    0.09 
   6  -1   2    0.02    0.08 
   6  -1   2    0.00    0.05 
  -7   1  -2   21.79    0.78 
   7  -1   2   20.97    0.79 
   7  -1   2   21.97    0.82 
   7  -1   2   21.52    0.90 
   7  -1   2   21.51    0.94 
  -8   1  -2    9.78    0.43 
   8  -1   2   10.66    0.61 
   8  -1   2    9.61    0.48 
   8  -1   2    9.67    0.57 
   9  -1   2   18.39    0.93 
   9  -1   2   19.09    0.78 
   9  -1   2   19.13    0.92 
  10  -1   2   17.27    0.76 
  10  -1   2   17.20    0.93 
  10  -1   2   17.43    0.91 
   9   0  -2   -0.01    0.19 
   9   0  -2    0.09    0.24 
   9   0  -2    0.30    0.13 
   8   0  -2    3.41    0.39 
   8   0  -2    4.18    0.52 
   8   0  -2    4.28    0.30 
   7   0  -2    7.71    0.39 
   7   0  -2    7.91    0.38 
   7   0  -2    7.76    0.60 
   7   0  -2    7.67    0.52 
  -7   0   2    7.46    0.33 
  -7   0   2    8.41    0.39 
   6   0  -2    6.93    0.51 
   6   0  -2    4.73    0.38 
   6   0  -2    5.84    0.30 
   6   0  -2    5.63    0.28 
  -6   0   2    5.29    0.25 
  -6   0   2    5.61    0.30 
   5   0  -2    4.51    0.39 
   5   0  -2    4.98    0.23 
   5   0  -2    4.40    0.32 
   5   0  -2    4.97    0.24 
  -5   0   2    4.56    0.24 
  -5   0   2    3.45    0.19 
  -5   0   2    4.55    0.38 
   4   0  -2    2.93    0.27 
   4   0  -2    2.60    0.15 
   4   0  -2    2.43    0.16 
   4   0  -2    1.76    0.25 
  -4   0   2    1.97    0.25 
  -4   0   2    2.18    0.15 
   3   0  -2   27.02    0.87 
   3   0  -2   28.57    0.91 
   3   0  -2   26.70    1.09 
   3   0  -2   27.77    0.99 
  -3   0   2   28.22    0.95 
  -3   0   2   28.43    1.10 
  -3   0   2   28.33    0.88 
   2   0  -2    0.80    0.07 
   2   0  -2    0.68    0.15 
   2   0  -2    0.79    0.12 
   2   0  -2    0.67    0.08 
  -2   0   2    0.76    0.16 
  -2   0   2    0.54    0.09 
  -2   0   2    0.85    0.09 
   1   0  -2  389.80   12.74 
   1   0  -2  399.57   12.17 
   1   0  -2  395.16   12.12 
   1   0  -2  387.39   11.34 
  -1   0   2  393.53   12.82 
  -1   0   2  400.25   12.19 
  -1   0   2  403.48   11.33 
   0   0  -2    6.33    0.23 
   0   0  -2    6.05    0.23 
   0   0  -2    6.16    0.25 
   0   0  -2    6.57    0.23 
   0   0   2    6.76    0.23 
   0   0   2    6.42    0.26 
   0   0   2    6.60    0.23 
  -1   0  -2    4.69    0.19 
  -1   0  -2    4.45    0.18 
  -1   0  -2    4.65    0.19 
   1   0   2    4.73    0.19 
   1   0   2    4.74    0.19 
   1   0   2    4.51    0.19 
  -2   0  -2   47.16    1.44 
  -2   0  -2   51.18    1.54 
  -2   0  -2   47.45    1.53 
   2   0   2   51.13    1.54 
   2   0   2   47.01    1.44 
   2   0   2   48.08    1.54 
  -3   0  -2    1.11    0.09 
  -3   0  -2    1.23    0.10 
  -3   0  -2    1.42    0.12 
   3   0   2    1.22    0.11 
   3   0   2    1.37    0.11 
   3   0   2    1.22    0.13 
  -4   0  -2    2.52    0.16 
  -4   0  -2    2.42    0.14 
  -4   0  -2    2.61    0.15 
   4   0   2    1.93    0.17 
   4   0   2    2.14    0.15 
   4   0   2    2.08    0.14 
  -5   0  -2    7.87    0.33 
  -5   0  -2    7.77    0.32 
   5   0   2    7.49    0.37 
   5   0   2    7.77    0.34 
   5   0   2    7.99    0.34 
  -6   0  -2   10.36    0.42 
  -6   0  -2   10.17    0.40 
   6   0   2   10.00    0.43 
   6   0   2   11.20    0.44 
   6   0   2    9.79    0.48 
   6   0   2   10.29    0.56 
  -7   0  -2    4.66    0.24 
  -7   0  -2    4.25    0.26 
   7   0   2    3.96    0.38 
   7   0   2    4.76    0.27 
   7   0   2    4.61    0.29 
   7   0   2    4.34    0.34 
  -8   0  -2    8.00    0.35 
   8   0   2    7.66    0.50 
   8   0   2    8.37    0.41 
   8   0   2    7.42    0.55 
   8   0   2    6.98    0.40 
   9   0   2    3.72    0.30 
   9   0   2    3.42    0.45 
   9   0   2    3.26    0.38 
  10   0   2    0.49    0.23 
  10   0   2    0.17    0.14 
  10   0   2    0.41    0.24 
   9  -1  -2    3.71    0.46 
   9  -1  -2    5.00    0.35 
   9  -1  -2    6.22    0.63 
   8  -1  -2    1.40    0.31 
   8  -1  -2    1.38    0.19 
   8  -1  -2    1.18    0.31 
   7  -1  -2    5.28    0.31 
   7  -1  -2    5.00    0.43 
   7  -1  -2    4.93    0.29 
   7  -1  -2    4.08    0.45 
  -7   1   2    5.01    0.26 
   6  -1  -2   50.19    1.93 
   6  -1  -2   50.39    1.81 
   6  -1  -2   53.77    1.67 
   6  -1  -2   51.31    1.60 
  -6   1   2   49.39    1.59 
  -6   1   2   50.04    1.93 
  -6   1   2   48.32    1.64 
   5  -1  -2   46.69    1.71 
   5  -1  -2   46.17    1.81 
   5  -1  -2   48.70    1.52 
   5  -1  -2   52.62    1.60 
  -5   1   2   47.47    1.57 
  -5   1   2   50.89    1.52 
  -5   1   2   47.82    1.83 
   4  -1  -2    0.14    0.10 
   4  -1  -2    0.15    0.12 
   4  -1  -2    0.15    0.07 
   4  -1  -2    0.21    0.06 
  -4   1   2    0.12    0.04 
  -4   1   2    0.06    0.06 
  -4   1   2    0.38    0.15 
   3  -1  -2    3.68    0.25 
   3  -1  -2    3.26    0.27 
   3  -1  -2    3.31    0.18 
   3  -1  -2    3.46    0.17 
  -3   1   2    3.24    0.27 
  -3   1   2    3.67    0.18 
  -3   1   2    3.68    0.22 
  -3   1   2    3.37    0.17 
   2  -1  -2    5.49    0.23 
   2  -1  -2    5.36    0.29 
   2  -1  -2    5.70    0.22 
   2  -1  -2    5.04    0.31 
  -2   1   2    6.35    0.34 
  -2   1   2    5.81    0.28 
  -2   1   2    5.49    0.22 
  -2   1   2    5.39    0.23 
   1  -1  -2   19.62    0.61 
   1  -1  -2   19.71    0.70 
   1  -1  -2   19.88    0.64 
  -1   1   2   19.19    0.64 
  -1   1   2   20.23    0.62 
  -1   1   2   19.34    0.74 
  -1   1   2   19.58    0.69 
   0  -1  -2    7.89    0.31 
   0  -1  -2    8.11    0.28 
   0  -1  -2    8.18    0.28 
   0   1   2    8.62    0.28 
   0   1   2    7.99    0.28 
   0   1   2    8.01    0.32 
  -1  -1  -2    2.49    0.13 
  -1  -1  -2    2.64    0.13 
  -1  -1  -2    2.56    0.13 
  -1  -1  -2    2.75    0.12 
   1   1   2    2.76    0.13 
   1   1   2    2.48    0.13 
   1   1   2    2.56    0.12 
  -2  -1  -2  161.48    4.72 
  -2  -1  -2  149.93    4.77 
  -2  -1  -2  157.21    4.41 
   2   1   2  151.93    4.41 
   2   1   2  154.88    4.72 
   2   1   2  148.56    5.17 
  -3  -1  -2  128.71    4.11 
  -3  -1  -2  135.69    4.12 
  -3  -1  -2  137.39    3.86 
   3   1   2  130.01    3.86 
   3   1   2  139.23    4.13 
   3   1   2  133.42    4.14 
  -4  -1  -2   20.81    0.68 
  -4  -1  -2   20.53    0.69 
  -4  -1  -2   21.00    0.71 
   4   1   2   20.42    0.72 
   4   1   2   20.32    0.70 
   4   1   2   20.42    0.68 
  -5  -1  -2  186.62    5.54 
  -5  -1  -2  181.67    5.20 
   5   1   2  181.81    5.56 
   5   1   2  175.09    5.59 
   5   1   2  176.10    5.21 
  -6  -1  -2    0.98    0.12 
  -6  -1  -2    1.01    0.09 
   6   1   2    1.14    0.13 
   6   1   2    0.91    0.13 
   6   1   2    0.99    0.15 
  -7  -1  -2    3.31    0.22 
   7   1   2    3.08    0.28 
   7   1   2    3.48    0.24 
   7   1   2    3.58    0.40 
   7   1   2    3.28    0.22 
  -8  -1  -2    1.28    0.16 
  -8  -1  -2    1.51    0.13 
   8   1   2    1.42    0.20 
   8   1   2    1.17    0.21 
   8   1   2    1.53    0.30 
   8   1   2    1.67    0.18 
   9   1   2    6.64    0.57 
   9   1   2    6.59    0.48 
   9   1   2    6.06    0.37 
  10   1   2    3.21    0.32 
  10   1   2    2.99    0.46 
  10   1   2    2.62    0.35 
   9  -2  -2   29.58    1.40 
   9  -2  -2   33.63    1.49 
   9  -2  -2   33.17    1.19 
   8  -2  -2   19.94    0.98 
   8  -2  -2   18.74    0.77 
   8  -2  -2   19.93    1.00 
   7  -2  -2    5.86    0.48 
   7  -2  -2    5.94    0.35 
   7  -2  -2    6.35    0.49 
  -7   2   2    6.45    0.32 
   6  -2  -2    8.55    0.55 
   6  -2  -2    8.86    0.42 
   6  -2  -2    9.91    0.41 
   6  -2  -2    8.13    0.52 
  -6   2   2    9.06    0.39 
  -6   2   2    9.00    0.42 
  -6   2   2    8.83    0.56 
   5  -2  -2    8.06    0.48 
   5  -2  -2    7.68    0.35 
   5  -2  -2    7.56    0.34 
   5  -2  -2    7.65    0.46 
  -5   2   2    7.44    0.33 
  -5   2   2    7.73    0.48 
  -5   2   2    8.31    0.36 
   4  -2  -2    6.04    0.37 
   4  -2  -2    5.97    0.27 
   4  -2  -2    5.88    0.37 
   4  -2  -2    5.71    0.27 
  -4   2   2    5.65    0.38 
  -4   2   2    5.34    0.25 
  -4   2   2    6.05    0.28 
   3  -2  -2   10.65    0.49 
   3  -2  -2   11.41    0.41 
   3  -2  -2   11.06    0.40 
  -3   2   2   10.61    0.51 
  -3   2   2   10.78    0.47 
  -3   2   2   10.32    0.40 
  -3   2   2   10.42    0.40 
   2  -2  -2   27.65    0.88 
   2  -2  -2   27.42    0.96 
   2  -2  -2   26.78    0.84 
  -2   2   2   26.72    0.84 
  -2   2   2   27.01    1.00 
  -2   2   2   25.84    0.87 
  -2   2   2   26.45    0.95 
   1  -2  -2    0.22    0.04 
   1  -2  -2    0.28    0.09 
   1  -2  -2    0.25    0.06 
  -1   2   2    0.32    0.05 
  -1   2   2    0.26    0.08 
  -1   2   2    0.22    0.05 
   0  -2  -2   76.32    2.21 
   0  -2  -2   76.56    2.35 
   0  -2  -2   76.12    2.38 
   0   2   2   74.46    2.35 
   0   2   2   78.12    2.21 
   0   2   2   76.37    2.39 
  -1  -2  -2  418.08   11.87 
  -1  -2  -2  384.52   11.12 
  -1  -2  -2  362.66   11.11 
   1   2   2  375.84   11.12 
   1   2   2  360.35   11.91 
   1   2   2  427.32   11.90 
   1   2   2  389.63   11.10 
  -2  -2  -2  498.64   14.85 
  -2  -2  -2  517.29   14.84 
  -2  -2  -2  516.64   13.88 
   2   2   2  484.80   13.89 
   2   2   2  463.19   14.88 
   2   2   2  433.89   14.86 
  -3  -2  -2  141.17    4.15 
  -3  -2  -2  127.58    4.16 
  -3  -2  -2  133.14    3.89 
   3   2   2  133.64    3.90 
   3   2   2  140.14    4.17 
   3   2   2  137.40    4.17 
  -4  -2  -2   17.72    0.59 
  -4  -2  -2   16.90    0.58 
  -4  -2  -2   17.65    0.58 
   4   2   2   17.01    0.62 
   4   2   2   17.43    0.59 
   4   2   2   18.94    0.61 
  -5  -2  -2   15.32    0.53 
  -5  -2  -2   16.34    0.55 
   5   2   2   16.30    0.57 
   5   2   2   14.82    0.59 
   5   2   2   15.50    0.55 
  -6  -2  -2    0.08    0.05 
  -6  -2  -2    0.01    0.03 
   6   2   2    0.13    0.07 
   6   2   2    0.00    0.08 
   6   2   2    0.01    0.05 
  -7  -2  -2    6.14    0.30 
  -7  -2  -2    5.49    0.25 
   7   2   2    6.26    0.32 
   7   2   2    6.32    0.37 
   7   2   2    5.25    0.48 
   7   2   2    6.16    0.31 
  -8  -2  -2    1.60    0.13 
  -8  -2  -2    1.49    0.17 
   8   2   2    1.64    0.19 
   8   2   2    1.39    0.22 
   8   2   2    1.64    0.33 
   9   2   2    0.52    0.14 
   9   2   2    0.89    0.28 
   9   2   2    0.91    0.23 
  10   2   2   14.35    0.92 
  10   2   2   13.89    0.67 
  10   2   2   14.41    0.77 
   9  -3  -2    1.40    0.22 
   9  -3  -2    1.01    0.29 
   8  -3  -2    4.62    0.34 
   8  -3  -2    6.53    0.61 
   7  -3  -2   38.03    1.55 
   7  -3  -2   37.60    1.32 
  -7   3   2   41.61    1.35 
   6  -3  -2   14.49    0.73 
   6  -3  -2   14.52    0.59 
  -6   3   2   13.87    0.56 
  -6   3   2   14.93    0.73 
   5  -3  -2    1.42    0.17 
   5  -3  -2    0.94    0.18 
  -5   3   2    1.37    0.15 
  -5   3   2    1.54    0.18 
  -5   3   2    1.37    0.22 
   4  -3  -2    8.57    0.36 
   4  -3  -2    8.39    0.46 
   4  -3  -2    8.67    0.35 
  -4   3   2    8.67    0.45 
  -4   3   2    7.86    0.42 
  -4   3   2    8.11    0.35 
  -4   3   2    8.41    0.36 
   3  -3  -2    0.60    0.14 
   3  -3  -2    0.63    0.10 
   3  -3  -2    0.49    0.07 
  -3   3   2    0.69    0.10 
  -3   3   2    0.53    0.10 
  -3   3   2    0.88    0.15 
  -3   3   2    0.70    0.08 
   2  -3  -2   15.96    0.63 
   2  -3  -2   15.93    0.54 
   2  -3  -2   16.22    0.55 
  -2   3   2   15.82    0.54 
  -2   3   2   15.74    0.63 
  -2   3   2   15.36    0.55 
   1  -3  -2  175.62    5.16 
   1  -3  -2  179.59    5.58 
   1  -3  -2  189.50    5.52 
  -1   3   2  180.67    5.16 
  -1   3   2  176.39    5.58 
   0  -3  -2    2.30    0.10 
   0  -3  -2    1.76    0.11 
   0   3   2    2.01    0.12 
   0   3   2    2.05    0.10 
   0   3   2    2.24    0.15 
  -1  -3  -2   28.56    0.88 
  -1  -3  -2   27.72    0.85 
  -1  -3  -2   28.43    0.89 
  -1  -3  -2   27.79    0.85 
   1   3   2   27.98    0.91 
   1   3   2   28.12    0.89 
   1   3   2   28.41    0.85 
  -2  -3  -2    6.55    0.24 
  -2  -3  -2    6.42    0.22 
  -2  -3  -2    6.68    0.22 
  -2  -3  -2    6.38    0.24 
   2   3   2    6.74    0.25 
   2   3   2    6.39    0.24 
   2   3   2    6.66    0.25 
  -3  -3  -2    0.48    0.07 
  -3  -3  -2    0.49    0.04 
  -3  -3  -2    0.56    0.04 
   3   3   2    0.38    0.06 
   3   3   2    0.41    0.07 
   3   3   2    0.56    0.07 
  -4  -3  -2   20.12    0.62 
  -4  -3  -2   18.69    0.63 
  -4  -3  -2   19.55    0.62 
   4   3   2   18.67    0.67 
   4   3   2   19.79    0.64 
   4   3   2   20.10    0.66 
  -5  -3  -2    5.15    0.19 
  -5  -3  -2    4.98    0.23 
   5   3   2    5.31    0.24 
   5   3   2    5.05    0.24 
  -6  -3  -2   11.93    0.45 
  -6  -3  -2   12.43    0.42 
   6   3   2   12.03    0.47 
   6   3   2   11.81    0.51 
   6   3   2   12.92    0.48 
  -7  -3  -2    8.06    0.37 
  -7  -3  -2    9.08    0.32 
   7   3   2   10.08    0.64 
   7   3   2    8.93    0.45 
   7   3   2    8.72    0.39 
   7   3   2    8.84    0.40 
  -8  -3  -2    0.09    0.07 
   8   3   2    0.06    0.09 
   8   3   2    0.26    0.19 
   8   3   2    0.08    0.11 
   9   3   2    0.70    0.27 
   9   3   2    0.57    0.14 
   9   3   2    0.40    0.16 
  10   3   2    1.09    0.25 
  10   3   2    1.27    0.34 
   9  -4  -2    0.47    0.26 
   9  -4  -2    0.51    0.17 
   8  -4  -2    3.84    0.48 
   8  -4  -2    3.78    0.31 
  -8   4   2    4.08    0.28 
   7  -4  -2    7.21    0.41 
   7  -4  -2    7.53    0.56 
  -7   4   2    7.15    0.37 
   6  -4  -2   15.25    0.62 
   6  -4  -2   15.53    0.78 
  -6   4   2   14.95    0.60 
  -6   4   2   15.35    0.74 
   5  -4  -2    0.12    0.09 
   5  -4  -2    0.03    0.14 
  -5   4   2    0.12    0.06 
  -5   4   2    0.21    0.13 
   4  -4  -2    2.11    0.26 
   4  -4  -2    1.91    0.19 
  -4   4   2    2.32    0.20 
  -4   4   2    1.39    0.18 
  -4   4   2    2.35    0.25 
  -4   4   2    1.74    0.14 
   3  -4  -2    3.02    0.17 
   3  -4  -2    2.97    0.25 
   3  -4  -2    2.87    0.19 
  -3   4   2    2.92    0.24 
  -3   4   2    2.73    0.18 
  -3   4   2    3.27    0.24 
   2  -4  -2   49.95    1.59 
   2  -4  -2   49.11    1.51 
   2  -4  -2   48.94    1.68 
  -2   4   2   50.78    1.69 
  -2   4   2   52.28    1.52 
  -2   4   2   48.98    1.59 
   1  -4  -2   41.47    1.30 
   1  -4  -2   40.59    1.35 
   1  -4  -2   40.57    1.24 
  -1   4   2   39.20    1.30 
  -1   4   2   41.70    1.39 
  -1   4   2   42.23    1.24 
   0  -4  -2    0.13    0.05 
   0  -4  -2    0.12    0.05 
   0   4   2    0.15    0.06 
   0   4   2    0.15    0.05 
   0   4   2    0.07    0.03 
  -1  -4  -2    4.56    0.19 
  -1  -4  -2    5.24    0.16 
  -1  -4  -2    4.88    0.20 
  -1  -4  -2    4.80    0.17 
   1   4   2    4.82    0.18 
   1   4   2    5.03    0.21 
   1   4   2    4.53    0.19 
  -2  -4  -2    3.38    0.15 
  -2  -4  -2    3.27    0.15 
   2   4   2    3.27    0.15 
   2   4   2    3.45    0.14 
  -3  -4  -2   12.45    0.40 
  -3  -4  -2   12.18    0.40 
   3   4   2   12.48    0.42 
   3   4   2   11.71    0.41 
   3   4   2   11.41    0.40 
  -4  -4  -2   53.50    1.57 
   4   4   2   55.16    1.68 
   4   4   2   51.88    1.58 
   4   4   2   52.38    1.68 
  -5  -4  -2   21.12    0.68 
   5   4   2   21.29    0.72 
   5   4   2   20.14    0.69 
   5   4   2   21.09    0.73 
  -6  -4  -2   23.28    0.77 
   6   4   2   23.39    0.79 
   6   4   2   24.80    0.82 
   6   4   2   22.75    0.84 
  -7  -4  -2    0.32    0.08 
   7   4   2    0.42    0.24 
   7   4   2    0.32    0.08 
   7   4   2    0.40    0.10 
   7   4   2    0.27    0.11 
   8   4   2    0.20    0.12 
   8   4   2   -0.10    0.21 
   8   4   2    0.07    0.09 
   9   4   2    6.94    0.46 
   9   4   2    7.73    0.68 
  10   4   2    3.58    0.55 
  10   4   2    3.14    0.37 
   9  -5  -2    8.36    0.71 
   9  -5  -2    8.95    0.52 
   8  -5  -2    1.43    0.23 
   8  -5  -2    1.61    0.36 
  -8   5   2    1.10    0.16 
   7  -5  -2   16.46    0.71 
   7  -5  -2   16.57    0.89 
  -7   5   2   17.23    0.68 
   6  -5  -2   46.26    1.51 
   6  -5  -2   45.47    1.75 
  -6   5   2   44.48    1.55 
  -6   5   2   48.14    1.73 
   5  -5  -2   45.84    1.68 
   5  -5  -2   44.57    1.46 
  -5   5   2   46.26    1.66 
  -5   5   2   43.58    1.50 
   4  -5  -2   67.68    2.29 
   4  -5  -2   66.25    2.04 
  -4   5   2   65.39    2.14 
  -4   5   2   68.43    2.26 
  -4   5   2   65.30    2.31 
   3  -5  -2    0.36    0.08 
   3  -5  -2    0.41    0.13 
  -3   5   2    0.37    0.08 
  -3   5   2    0.44    0.11 
  -3   5   2    0.52    0.12 
  -3   5   2    0.65    0.11 
   2  -5  -2    1.37    0.13 
   2  -5  -2    1.80    0.20 
  -2   5   2    1.43    0.11 
  -2   5   2    1.76    0.20 
  -2   5   2    1.69    0.15 
   1  -5  -2    0.50    0.09 
   1  -5  -2    0.54    0.07 
   1  -5  -2    0.46    0.08 
  -1   5   2    0.51    0.13 
  -1   5   2    0.40    0.06 
  -1   5   2    0.47    0.08 
   0  -5  -2    6.06    0.24 
   0  -5  -2    5.76    0.23 
   0  -5  -2    5.53    0.21 
   0   5   2    5.94    0.24 
   0   5   2    5.88    0.29 
   0   5   2    5.76    0.23 
  -1  -5  -2    9.16    0.32 
  -1  -5  -2    8.31    0.30 
   1   5   2    8.85    0.34 
   1   5   2    8.48    0.31 
   1   5   2    8.87    0.31 
  -2  -5  -2    7.00    0.25 
   2   5   2    6.95    0.26 
   2   5   2    6.66    0.24 
  -3  -5  -2   11.64    0.39 
   3   5   2   11.81    0.40 
   3   5   2   12.11    0.41 
   3   5   2   11.70    0.40 
  -4  -5  -2   17.02    0.55 
   4   5   2   17.75    0.59 
   4   5   2   17.32    0.56 
   4   5   2   17.03    0.59 
  -5  -5  -2    3.88    0.18 
   5   5   2    3.52    0.19 
   5   5   2    4.12    0.21 
   5   5   2    3.71    0.19 
  -6  -5  -2    8.94    0.34 
   6   5   2    8.50    0.36 
   6   5   2    8.97    0.36 
  -7  -5  -2    1.48    0.14 
   7   5   2    1.68    0.15 
   7   5   2    1.52    0.35 
   7   5   2    1.26    0.15 
   7   5   2    1.46    0.18 
   8   5   2    0.05    0.23 
   8   5   2    0.28    0.13 
   9   5   2    2.00    0.42 
   9   5   2    2.05    0.28 
  10   5   2    0.04    0.15 
   8  -6  -2   13.27    0.66 
   8  -6  -2   14.20    0.87 
  -8   6   2   14.41    0.63 
   7  -6  -2   -0.11    0.16 
   7  -6  -2    0.07    0.11 
  -7   6   2   -0.03    0.06 
   6  -6  -2   92.38    2.85 
   6  -6  -2   94.86    3.21 
  -6   6   2   93.01    3.19 
  -6   6   2   91.47    2.99 
   5  -6  -2    8.91    0.42 
   5  -6  -2    8.64    0.54 
  -5   6   2    8.67    0.40 
  -5   6   2    8.60    0.46 
   4  -6  -2    1.26    0.21 
   4  -6  -2    1.59    0.17 
  -4   6   2    1.63    0.20 
  -4   6   2    1.30    0.14 
  -4   6   2    0.94    0.16 
   3  -6  -2    4.89    0.25 
   3  -6  -2    4.86    0.32 
  -3   6   2    4.46    0.24 
  -3   6   2    4.55    0.33 
   2  -6  -2    0.06    0.05 
   2  -6  -2    0.00    0.05 
  -2   6   2    0.07    0.09 
  -2   6   2   -0.04    0.05 
  -2   6   2    0.02    0.04 
   1  -6  -2    1.34    0.13 
   1  -6  -2    1.09    0.12 
  -1   6   2    1.12    0.10 
  -1   6   2    1.38    0.18 
  -1   6   2    1.26    0.12 
   0  -6  -2    0.49    0.04 
   0  -6  -2    0.52    0.08 
   0   6   2    0.48    0.08 
   0   6   2    0.50    0.07 
   0   6   2    0.53    0.10 
  -1  -6  -2   24.44    0.75 
  -1  -6  -2   24.78    0.77 
   1   6   2   24.31    0.83 
   1   6   2   24.41    0.76 
   1   6   2   23.78    0.78 
  -2  -6  -2   28.65    0.88 
   2   6   2   29.45    0.94 
   2   6   2   30.66    0.96 
  -3  -6  -2    4.66    0.18 
  -3  -6  -2    4.96    0.19 
   3   6   2    4.99    0.19 
   3   6   2    5.20    0.20 
  -4  -6  -2   16.27    0.51 
  -4  -6  -2   16.55    0.51 
   4   6   2   15.63    0.55 
   4   6   2   16.18    0.52 
   4   6   2   16.82    0.56 
  -5  -6  -2   21.05    0.68 
  -5  -6  -2   21.48    0.67 
   5   6   2   22.35    0.74 
   5   6   2   21.82    0.74 
   5   6   2   21.57    0.69 
  -6  -6  -2    0.99    0.10 
   6   6   2    1.16    0.14 
   6   6   2    1.24    0.12 
   6   6   2    1.19    0.12 
   7   6   2    0.13    0.10 
   7   6   2    0.01    0.06 
   7   6   2    0.08    0.20 
   8   6   2   -0.21    0.24 
   8   6   2   -0.04    0.10 
   9   6   2    1.39    0.23 
   8  -7  -2    5.92    0.42 
  -8   7   2    6.32    0.38 
   7  -7  -2   -0.17    0.08 
  -7   7   2   -0.01    0.06 
   6  -7  -2   16.02    0.82 
   6  -7  -2   15.68    0.67 
  -6   7   2   15.50    0.65 
   5  -7  -2   31.36    1.26 
   5  -7  -2   31.05    1.09 
  -5   7   2   31.53    1.18 
  -5   7   2   30.92    1.11 
   4  -7  -2    0.47    0.12 
   4  -7  -2    0.44    0.15 
  -4   7   2    0.50    0.13 
  -4   7   2    0.34    0.08 
  -4   7   2    0.28    0.12 
   3  -7  -2    4.72    0.27 
  -3   7   2    5.55    0.37 
  -3   7   2    5.04    0.26 
   2  -7  -2   36.73    1.18 
   2  -7  -2   38.35    1.28 
  -2   7   2   35.06    1.23 
  -2   7   2   39.59    1.37 
   1  -7  -2   11.42    0.42 
   1  -7  -2   10.99    0.42 
  -1   7   2   12.30    0.54 
  -1   7   2   10.57    0.42 
  -1   7   2   11.49    0.43 
   0  -7  -2    0.27    0.06 
   0   7   2    0.34    0.07 
   0   7   2    0.33    0.06 
   0   7   2    0.23    0.10 
  -1  -7  -2    0.14    0.06 
  -1  -7  -2    0.24    0.05 
   1   7   2    0.10    0.05 
   1   7   2    0.12    0.04 
   1   7   2    0.18    0.07 
  -2  -7  -2   11.74    0.38 
  -2  -7  -2   11.95    0.40 
   2   7   2   11.94    0.44 
   2   7   2   11.84    0.40 
  -3  -7  -2   12.85    0.40 
  -3  -7  -2   13.13    0.41 
   3   7   2   13.46    0.46 
   3   7   2   13.23    0.44 
  -4  -7  -2   21.89    0.65 
  -4  -7  -2   22.62    0.65 
   4   7   2   21.44    0.73 
   4   7   2   22.69    0.74 
  -5  -7  -2    0.04    0.03 
  -5  -7  -2    0.04    0.03 
   5   7   2    0.02    0.04 
   5   7   2   -0.02    0.04 
  -6  -7  -2   11.28    0.38 
  -6  -7  -2   11.37    0.37 
   6   7   2   10.56    0.45 
   6   7   2   11.77    0.44 
  -7  -7  -2    0.56    0.08 
   7   7   2    0.48    0.12 
   7   7   2    0.19    0.25 
  -8  -7  -2   -0.08    0.05 
   8   7   2    0.03    0.11 
   8   7   2    0.12    0.27 
  -9  -7  -2    0.12    0.07 
   9   7   2    0.28    0.15 
   8  -8  -2    1.90    0.27 
  -8   8   2    1.43    0.20 
   7  -8  -2    4.24    0.38 
  -7   8   2    4.29    0.30 
   6  -8  -2   -0.09    0.09 
  -6   8   2   -0.03    0.07 
   5  -8  -2    1.66    0.20 
  -5   8   2    1.51    0.18 
   4  -8  -2   65.27    2.03 
  -4   8   2   64.44    2.24 
  -4   8   2   64.81    2.12 
   3  -8  -2    5.72    0.30 
   3  -8  -2    5.77    0.34 
  -3   8   2    5.13    0.28 
  -3   8   2    5.76    0.40 
   2  -8  -2    3.62    0.22 
   2  -8  -2    3.57    0.22 
  -2   8   2    3.44    0.21 
  -2   8   2    4.10    0.33 
   1  -8  -2    2.68    0.18 
  -1   8   2    2.76    0.17 
  -1   8   2    2.80    0.29 
   0  -8  -2   -0.03    0.04 
   0   8   2    0.00    0.08 
   0   8   2    0.02    0.04 
  -1  -8  -2    5.72    0.23 
   1   8   2    6.38    0.32 
   1   8   2    6.27    0.25 
   1   8   2    5.49    0.24 
  -2  -8  -2    0.05    0.04 
  -2  -8  -2    0.08    0.03 
   2   8   2   -0.01    0.06 
   2   8   2    0.06    0.04 
   3   8   2   12.98    0.46 
   3   8   2   12.74    0.44 
   4   8   2   16.56    0.56 
   4   8   2   16.73    0.57 
   5   8   2    1.16    0.11 
   5   8   2    1.25    0.11 
   6   8   2    6.05    0.27 
   6   8   2    5.94    0.67 
   6   8   2    5.60    0.28 
   7   8   2    2.72    0.22 
   7   8   2    3.47    0.56 
   8   8   2    0.15    0.12 
   7  -9  -2    0.03    0.12 
  -7   9   2    0.10    0.10 
   6  -9  -2   10.37    0.53 
  -6   9   2   10.59    0.51 
   5  -9  -2   18.74    0.76 
  -5   9   2   18.83    0.75 
   4  -9  -2   15.54    0.63 
  -4   9   2   14.89    0.62 
   3  -9  -2   49.17    1.57 
  -3   9   2   48.80    1.63 
   2  -9  -2   40.01    1.26 
  -2   9   2   39.58    1.46 
  -2   9   2   37.76    1.31 
   1  -9  -2   36.23    1.17 
  -1   9   2   38.50    1.38 
  -1   9   2   36.93    1.23 
   0  -9  -2    5.36    0.25 
   0   9   2    6.37    0.38 
   0   9   2    5.52    0.25 
  -1  -9  -2    5.31    0.22 
   1   9   2    5.00    0.31 
   1   9   2    4.87    0.22 
  -2  -9  -2    8.90    0.31 
  -2  -9  -2    9.49    0.31 
   2   9   2    9.26    0.34 
   2   9   2    9.65    0.41 
   3   9   2    1.57    0.10 
   3   9   2    1.44    0.13 
   4   9   2    0.96    0.09 
   4   9   2    1.16    0.11 
   5   9   2   12.21    0.44 
   5   9   2   11.14    0.43 
   6   9   2   20.46    0.73 
   6   9   2   20.79    1.17 
   6 -10  -2   16.52    0.74 
  -6  10   2   16.97    0.72 
   5 -10  -2   27.84    1.04 
  -5  10   2   28.32    1.05 
   4 -10  -2    2.19    0.24 
  -4  10   2    2.44    0.21 
   3 -10  -2   -0.02    0.08 
  -3  10   2    0.12    0.07 
   2 -10  -2   19.28    0.69 
  -2  10   2   17.91    0.69 
   1 -10  -2    0.94    0.12 
  -1  10   2    0.67    0.10 
   0 -10  -2    1.40    0.14 
   0  10   2    1.26    0.13 
   0  10   2    1.23    0.20 
  -1 -10  -2    1.07    0.11 
  -1 -10  -2    0.93    0.09 
   1  10   2    1.04    0.18 
   1  10   2    1.03    0.11 
   2  10   2    7.14    0.37 
   2  10   2    7.24    0.29 
   3  10   2    7.67    0.30 
   3  10   2    7.72    0.35 
   4  10   2   14.10    0.52 
   4  10   2   13.57    0.48 
   5  10   2    5.39    0.25 
   5  10   2    3.96    0.55 
   5  10   2    5.18    0.23 
   6  10   2    0.08    0.06 
   6  10   2    0.00    0.29 
   5 -11  -2    1.31    0.20 
  -5  11   2    1.28    0.18 
   4 -11  -2    1.24    0.19 
  -4  11   2    1.05    0.17 
   3 -11  -2   -0.04    0.08 
  -3  11   2    0.15    0.08 
   2 -11  -2    0.82    0.14 
  -2  11   2    0.64    0.11 
   1 -11  -2    5.15    0.27 
  -1  11   2    4.93    0.27 
   0 -11  -2    6.87    0.30 
   0  11   2    6.69    0.31 
  -1 -11  -2    8.98    0.31 
   1  11   2    8.11    0.35 
   2  11   2    8.08    0.33 
   3  11   2    0.15    0.06 
   3  11   2    0.07    0.09 
   4  11   2    1.53    0.11 
   4  11   2    1.57    0.38 
   5  11   2    2.65    0.16 
   5  11   2    3.13    0.53 
   3 -12  -2   13.59    0.59 
  -3  12   2   13.47    0.59 
   2 -12  -2    4.20    0.28 
  -2  12   2    4.24    0.27 
   1 -12  -2    2.45    0.20 
  -1  12   2    2.78    0.20 
   0 -12  -2    0.94    0.11 
   0  12   2    1.08    0.13 
   1  12   2    0.00    0.06 
   2  12   2    0.64    0.09 
   3  12   2    1.78    0.13 
   3  12   2    1.73    0.39 
   1  11  -3    2.03    0.15 
   0  11  -3    8.61    0.37 
  -1  11  -3    0.02    0.06 
  -2  11  -3    0.37    0.10 
   2 -11   3    0.44    0.10 
  -3  11  -3    3.89    0.27 
   3 -11   3    4.64    0.29 
  -4  11  -3    8.40    0.44 
   4 -11   3    9.46    0.46 
   3  10  -3    1.55    0.36 
   2  10  -3    0.30    0.07 
   2  10  -3    0.30    0.24 
   1  10  -3   10.07    0.39 
   1  10  -3   10.53    0.70 
   0  10  -3    8.99    0.38 
   0  10  -3    9.38    0.63 
  -1  10  -3   10.96    0.45 
   1 -10   3   10.46    0.39 
  -2  10  -3   12.12    0.50 
   2 -10   3   12.42    0.49 
  -3  10  -3    8.34    0.40 
   3 -10   3    8.50    0.40 
  -4  10  -3   15.36    0.64 
   4 -10   3   15.77    0.65 
  -5  10  -3    9.09    0.45 
   5 -10   3    9.04    0.47 
  -6  10  -3    1.49    0.21 
   6 -10   3    1.61    0.24 
   5   9  -3    0.09    0.08 
   4   9  -3    3.01    0.51 
   4   9  -3    2.87    0.14 
   3   9  -3    1.54    0.10 
   3   9  -3    1.23    0.11 
   3   9  -3    1.72    0.36 
   2   9  -3    1.57    0.34 
   2   9  -3    1.22    0.11 
   1   9  -3    3.13    0.41 
   1   9  -3    2.86    0.17 
   1   9  -3    3.03    0.18 
   0   9  -3    0.57    0.11 
   0   9  -3    0.71    0.10 
   0   9  -3    0.54    0.20 
  -1   9  -3   21.58    0.78 
  -1   9  -3   22.64    0.96 
  -1   9  -3   22.33    0.83 
   1  -9   3   22.25    0.73 
  -2   9  -3   23.61    0.91 
  -2   9  -3   22.63    0.82 
   2  -9   3   22.29    0.78 
  -3   9  -3    4.31    0.26 
   3  -9   3    4.12    0.27 
  -4   9  -3    2.19    0.20 
   4  -9   3    2.52    0.24 
  -5   9  -3    6.66    0.37 
   5  -9   3    6.77    0.39 
  -6   9  -3    1.97    0.23 
   6  -9   3    1.42    0.22 
  -7   9  -3    0.27    0.11 
   7  -9   3    0.08    0.12 
   6   8  -3    0.19    0.12 
   5   8  -3    4.83    0.29 
   5   8  -3    5.03    0.64 
   4   8  -3    0.30    0.25 
   4   8  -3    0.57    0.10 
   4   8  -3    0.62    0.07 
   3   8  -3    0.32    0.22 
   3   8  -3    0.50    0.06 
   2   8  -3    6.06    0.25 
   2   8  -3    5.99    0.24 
   2   8  -3    6.64    0.54 
   1   8  -3    6.34    0.50 
   1   8  -3    6.11    0.26 
   1   8  -3    5.84    0.26 
   0   8  -3    7.09    0.32 
   0   8  -3    6.88    0.25 
   0   8  -3    7.29    0.49 
   0   8  -3    6.83    0.30 
   0   8  -3    6.91    0.26 
   0  -8   3    7.07    0.25 
  -1   8  -3    0.05    0.12 
  -1   8  -3    0.00    0.07 
  -1   8  -3    0.05    0.06 
   1  -8   3    0.05    0.06 
  -2   8  -3    4.98    0.31 
  -2   8  -3    4.62    0.25 
  -2   8  -3    4.55    0.29 
   2  -8   3    4.35    0.25 
  -3   8  -3    0.19    0.08 
  -3   8  -3    0.10    0.10 
   3  -8   3    0.22    0.09 
  -4   8  -3    4.99    0.28 
   4  -8   3    4.35    0.29 
  -5   8  -3    4.55    0.28 
   5  -8   3    4.06    0.30 
  -6   8  -3    7.98    0.43 
   6  -8   3    9.06    0.47 
  -7   8  -3    0.20    0.10 
   7  -8   3    0.23    0.14 
  -8   8  -3    0.25    0.11 
   8  -8   3    0.35    0.16 
   6   7  -3    5.90    0.69 
   6   7  -3    5.62    0.37 
   5   7  -3    6.10    0.25 
   5   7  -3    5.54    0.63 
   5   7  -3    5.72    0.33 
   4   7  -3   20.87    1.08 
   4   7  -3   19.60    0.64 
   4   7  -3   18.26    0.70 
   3   7  -3    7.04    0.31 
   3   7  -3    8.85    0.63 
   3   7  -3    7.62    0.28 
   2   7  -3   31.01    1.04 
   2   7  -3   32.79    1.02 
   2   7  -3   32.50    1.39 
   1   7  -3    3.18    0.16 
   1   7  -3    2.89    0.16 
   1   7  -3    2.56    0.34 
   0   7  -3    9.64    0.38 
   0   7  -3   10.23    0.57 
   0   7  -3    9.73    0.39 
   0   7  -3    9.94    0.34 
   0   7  -3    9.61    0.34 
   0  -7   3    9.71    0.34 
  -1   7  -3    7.82    0.36 
  -1   7  -3    7.63    0.33 
  -1   7  -3    8.81    0.46 
   1  -7   3    8.16    0.32 
  -2   7  -3    4.89    0.25 
  -2   7  -3    5.13    0.29 
  -2   7  -3    4.93    0.30 
   2  -7   3    4.61    0.25 
  -3   7  -3   17.75    0.71 
  -3   7  -3   17.45    0.66 
   3  -7   3   18.47    0.65 
   3  -7   3   17.02    0.65 
  -4   7  -3    3.70    0.29 
  -4   7  -3    4.16    0.25 
   4  -7   3    4.05    0.26 
   4  -7   3    4.19    0.28 
  -5   7  -3    3.02    0.22 
   5  -7   3    3.09    0.25 
  -6   7  -3    6.78    0.37 
   6  -7   3    6.69    0.40 
  -7   7  -3   27.75    1.05 
   7  -7   3   28.98    1.08 
  -8   7  -3    9.94    0.50 
   8  -7   3   10.13    0.56 
   7   6  -3    7.60    0.48 
   6   6  -3    0.94    0.35 
   6   6  -3    1.38    0.21 
   5   6  -3    2.00    0.22 
   5   6  -3    2.03    0.13 
   5   6  -3    2.21    0.39 
   4   6  -3    8.00    0.38 
   4   6  -3    8.39    0.31 
   4   6  -3    8.76    0.65 
   3   6  -3   12.75    0.77 
   3   6  -3   12.88    0.49 
   3   6  -3   13.44    0.45 
   2   6  -3    6.97    0.29 
   2   6  -3    6.01    0.49 
   2   6  -3    7.21    0.26 
   1   6  -3    4.73    0.39 
   1   6  -3    4.50    0.17 
   1   6  -3    4.20    0.20 
   1   6  -3    4.68    0.17 
   0   6  -3    7.23    0.26 
   0   6  -3    6.92    0.29 
   0   6  -3    7.38    0.45 
   0   6  -3    6.98    0.29 
   0   6  -3    6.76    0.26 
   0  -6   3    6.94    0.27 
  -1   6  -3   14.33    0.52 
  -1   6  -3   13.54    0.61 
  -1   6  -3   13.62    0.46 
  -1   6  -3   13.17    0.49 
   1  -6   3   12.38    0.47 
  -2   6  -3    0.26    0.07 
  -2   6  -3    0.54    0.10 
   2  -6   3    0.25    0.08 
  -3   6  -3   12.01    0.50 
  -3   6  -3   10.13    0.44 
   3  -6   3   11.53    0.47 
   3  -6   3   11.42    0.46 
  -4   6  -3    7.60    0.36 
  -4   6  -3    8.31    0.42 
   4  -6   3    7.75    0.37 
   4  -6   3    7.94    0.41 
  -5   6  -3   61.17    1.98 
  -5   6  -3   58.91    2.05 
   5  -6   3   60.73    1.91 
  -6   6  -3    1.29    0.17 
   6  -6   3    1.22    0.20 
   6  -6   3    1.13    0.21 
  -7   6  -3    4.44    0.29 
   7  -6   3    4.24    0.43 
   7  -6   3    4.45    0.32 
  -8   6  -3    2.03    0.23 
   8  -6   3    1.17    0.22 
  -9   6  -3   -0.08    0.07 
   9  -6   3    0.01    0.13 
   8   5  -3    0.45    0.19 
   7   5  -3    0.33    0.33 
   7   5  -3    0.45    0.17 
   6   5  -3    3.24    0.51 
   6   5  -3    2.19    0.26 
   5   5  -3   25.70    0.97 
   5   5  -3   27.42    0.88 
   5   5  -3   27.14    1.30 
   5   5  -3   25.83    0.82 
  -5  -5   3   25.30    0.81 
   4   5  -3   10.88    0.35 
   4   5  -3   10.44    0.45 
   4   5  -3   10.76    0.37 
   4   5  -3   11.21    0.39 
   4   5  -3   11.23    0.72 
  -4  -5   3    9.38    0.34 
   3   5  -3    1.61    0.10 
   3   5  -3    1.73    0.09 
   3   5  -3    2.01    0.33 
   3   5  -3    1.41    0.14 
   3   5  -3    1.61    0.08 
   2   5  -3    3.73    0.14 
   2   5  -3    3.76    0.16 
   2   5  -3    3.73    0.14 
   2   5  -3    3.63    0.19 
   2   5  -3    3.66    0.39 
   1   5  -3    0.66    0.08 
   1   5  -3    0.74    0.18 
   1   5  -3    0.76    0.06 
   1   5  -3    0.71    0.06 
   0   5  -3   31.24    0.93 
   0   5  -3   30.97    1.20 
   0   5  -3   30.98    0.93 
   0   5  -3   30.89    1.00 
   0   5  -3   30.40    1.00 
   0  -5   3   30.14    0.94 
  -1   5  -3   17.25    0.63 
  -1   5  -3   18.66    0.60 
  -1   5  -3   18.40    0.74 
  -1   5  -3   18.38    0.65 
   1  -5   3   18.09    0.60 
  -2   5  -3    0.30    0.09 
  -2   5  -3    0.36    0.07 
  -2   5  -3    0.33    0.07 
   2  -5   3    0.37    0.07 
   2  -5   3    0.32    0.08 
  -3   5  -3   60.87    2.01 
  -3   5  -3   64.58    2.06 
   3  -5   3   61.73    1.91 
   3  -5   3   64.29    2.05 
  -4   5  -3    3.58    0.22 
  -4   5  -3    4.14    0.27 
   4  -5   3    3.96    0.25 
  -5   5  -3    3.05    0.25 
  -5   5  -3    2.75    0.20 
   5  -5   3    2.22    0.22 
   5  -5   3    2.36    0.25 
  -6   5  -3    0.45    0.11 
   6  -5   3    0.58    0.16 
   6  -5   3    0.51    0.14 
  -7   5  -3    4.32    0.29 
   7  -5   3    4.96    0.33 
   7  -5   3    4.85    0.40 
  -8   5  -3    1.02    0.15 
   8  -5   3    0.81    0.23 
   8  -5   3    1.48    0.23 
  -9   5  -3    1.54    0.20 
   9  -5   3    2.46    0.31 
  10  -5   3    1.42    0.25 
   8   4  -3    0.01    0.17 
   7   4  -3   16.14    0.77 
   7   4  -3   15.96    1.02 
   6   4  -3    6.70    0.63 
   6   4  -3    5.73    0.39 
   5   4  -3    8.13    0.32 
   5   4  -3    7.60    0.42 
   5   4  -3    9.01    0.66 
   5   4  -3    7.78    0.32 
  -5  -4   3    7.57    0.31 
   4   4  -3    2.29    0.13 
   4   4  -3    1.94    0.20 
   4   4  -3    1.99    0.12 
   4   4  -3    1.78    0.33 
   3   4  -3    0.05    0.03 
   3   4  -3    0.13    0.16 
   3   4  -3    0.04    0.06 
   3   4  -3    0.13    0.05 
   3   4  -3    0.06    0.04 
  -3  -4   3    0.07    0.04 
   2   4  -3    8.76    0.30 
   2   4  -3    8.53    0.53 
   2   4  -3    9.12    0.32 
   2   4  -3    8.32    0.35 
   2   4  -3    9.15    0.31 
   1   4  -3    3.42    0.15 
   1   4  -3    3.32    0.31 
   1   4  -3    3.13    0.17 
   1   4  -3    3.33    0.14 
   1   4  -3    3.28    0.15 
  -1  -4   3    3.57    0.30 
   0   4  -3   78.90    2.57 
   0   4  -3   85.58    2.84 
   0   4  -3   82.77    2.39 
   0   4  -3   83.13    2.40 
   0  -4   3   84.60    2.40 
   0  -4   3   80.78    2.83 
  -1   4  -3    0.26    0.06 
  -1   4  -3    0.31    0.07 
  -1   4  -3    0.17    0.09 
  -1   4  -3    0.37    0.07 
   1  -4   3    0.43    0.07 
   1  -4   3    0.53    0.12 
  -2   4  -3    0.51    0.09 
  -2   4  -3    0.35    0.07 
  -2   4  -3    0.29    0.06 
   2  -4   3    0.44    0.08 
   2  -4   3    0.47    0.09 
   2  -4   3    0.30    0.07 
  -3   4  -3    9.89    0.41 
  -3   4  -3    9.30    0.37 
  -3   4  -3    8.82    0.38 
   3  -4   3    8.83    0.38 
  -4   4  -3    4.99    0.26 
  -4   4  -3    5.36    0.30 
   4  -4   3    4.70    0.27 
   4  -4   3    5.17    0.31 
  -5   4  -3    5.42    0.31 
  -5   4  -3    4.48    0.26 
   5  -4   3    4.79    0.29 
   5  -4   3    4.78    0.33 
  -6   4  -3    3.51    0.23 
   6  -4   3    3.22    0.25 
   6  -4   3    3.64    0.32 
  -7   4  -3   28.21    1.01 
   7  -4   3   26.77    1.01 
   7  -4   3   28.66    1.14 
  -8   4  -3    6.35    0.35 
   8  -4   3    6.35    0.40 
   8  -4   3    6.42    0.49 
  -9   4  -3    5.12    0.33 
   9  -4   3    5.99    0.50 
   9  -4   3    6.33    0.42 
  10  -4   3    0.12    0.14 
  10  -4   3   -0.07    0.17 
   8   3  -3    0.79    0.35 
   8   3  -3    0.91    0.24 
   7   3  -3    6.00    0.45 
   7   3  -3    6.68    0.72 
   6   3  -3   15.48    0.93 
   6   3  -3   14.80    0.57 
   6   3  -3   15.22    0.70 
   6   3  -3   14.93    0.56 
  -6  -3   3   15.63    0.56 
   5   3  -3    0.35    0.08 
   5   3  -3    0.20    0.12 
   5   3  -3    0.44    0.08 
   5   3  -3    0.35    0.22 
  -5  -3   3    0.47    0.09 
   4   3  -3   11.21    0.51 
   4   3  -3   11.53    0.42 
   4   3  -3   12.25    0.43 
   4   3  -3   11.69    0.69 
  -4  -3   3   11.91    0.42 
   3   3  -3  195.53    5.67 
   3   3  -3  196.10    6.66 
   3   3  -3  205.48    6.08 
   3   3  -3  194.27    6.14 
  -3  -3   3  200.07    5.68 
  -3  -3   3  199.91    6.66 
   2   3  -3  115.78    3.74 
   2   3  -3  119.31    3.46 
   2   3  -3  116.73    3.44 
   2   3  -3  119.89    4.10 
   2   3  -3  125.89    3.69 
  -2  -3   3  119.35    4.10 
  -2  -3   3  122.89    3.45 
   1   3  -3    0.12    0.04 
   1   3  -3    0.09    0.04 
   1   3  -3    0.14    0.06 
   1   3  -3    0.21    0.05 
   1   3  -3    0.19    0.12 
  -1  -3   3    0.04    0.11 
   0   3  -3   25.02    0.83 
   0   3  -3   25.33    0.77 
   0   3  -3   24.95    0.96 
   0   3  -3   24.28    0.81 
   0   3  -3   24.97    0.77 
   0  -3   3   25.24    0.77 
   0  -3   3   24.06    0.96 
  -1   3  -3   32.21    1.06 
  -1   3  -3   33.09    0.99 
   1  -3   3   32.67    1.04 
   1  -3   3   31.47    0.99 
   1  -3   3   32.45    1.17 
   1  -3   3   32.36    1.04 
  -2   3  -3    4.25    0.21 
  -2   3  -3    4.60    0.21 
  -2   3  -3    4.33    0.22 
   2  -3   3    4.55    0.21 
   2  -3   3    4.19    0.22 
   2  -3   3    4.35    0.23 
   2  -3   3    4.45    0.22 
  -3   3  -3    0.29    0.07 
  -3   3  -3    0.33    0.08 
  -3   3  -3    0.29    0.07 
   3  -3   3    0.14    0.07 
   3  -3   3    0.34    0.06 
   3  -3   3    0.38    0.09 
  -4   3  -3    5.09    0.27 
  -4   3  -3    4.57    0.24 
   4  -3   3    4.89    0.26 
   4  -3   3    4.51    0.28 
  -5   3  -3   74.71    2.42 
  -5   3  -3   76.99    2.47 
   5  -3   3   76.25    2.49 
   5  -3   3   75.11    2.49 
   5  -3   3   75.62    2.31 
  -6   3  -3   28.71    0.99 
   6  -3   3   26.54    0.97 
   6  -3   3   27.76    1.00 
   6  -3   3   28.58    1.08 
  -7   3  -3   31.40    1.10 
   7  -3   3   31.26    1.14 
   7  -3   3   31.56    1.10 
   7  -3   3   30.17    1.21 
  -8   3  -3   40.95    1.43 
   8  -3   3   42.30    1.59 
   8  -3   3   41.78    1.43 
   8  -3   3   41.46    1.52 
  -9   3  -3    6.38    0.36 
   9  -3   3    6.79    0.43 
   9  -3   3    6.50    0.43 
   9  -3   3    6.47    0.52 
  10  -3   3    0.05    0.15 
  10  -3   3    0.33    0.22 
   9   2  -3    3.53    0.47 
   8   2  -3    1.83    0.42 
   8   2  -3    1.47    0.28 
   7   2  -3    0.34    0.17 
   7   2  -3    0.37    0.11 
   7   2  -3    0.73    0.29 
   6   2  -3   18.49    1.02 
   6   2  -3   18.52    0.83 
   6   2  -3   19.47    0.69 
   6   2  -3   18.87    0.67 
  -6  -2   3   18.43    0.68 
   5   2  -3   11.38    0.43 
   5   2  -3   11.68    0.71 
   5   2  -3   10.46    0.54 
   5   2  -3   11.84    0.44 
  -5  -2   3   11.03    0.44 
   4   2  -3    8.87    0.44 
   4   2  -3    8.95    0.35 
   4   2  -3    8.97    0.59 
   4   2  -3    9.49    0.36 
  -4  -2   3    9.26    0.36 
  -4  -2   3    9.23    0.57 
   3   2  -3   77.16    2.28 
   3   2  -3   81.28    2.44 
   3   2  -3   78.63    2.79 
   3   2  -3   76.39    2.51 
  -3  -2   3   76.12    2.77 
  -3  -2   3   79.01    2.29 
   2   2  -3    1.20    0.10 
   2   2  -3    1.51    0.23 
   2   2  -3    1.39    0.09 
   2   2  -3    1.33    0.14 
  -2  -2   3    1.39    0.22 
  -2  -2   3    1.23    0.10 
   1   2  -3   13.66    0.45 
   1   2  -3   13.53    0.46 
   1   2  -3   13.17    0.50 
   1   2  -3   12.85    0.60 
   1   2  -3   13.31    0.44 
  -1  -2   3   13.04    0.61 
  -1  -2   3   13.24    0.44 
   0   2  -3    9.81    0.34 
   0   2  -3    9.67    0.34 
   0   2  -3    9.92    0.35 
   0   2  -3    9.13    0.45 
   0   2  -3    9.41    0.37 
   0  -2   3    9.62    0.34 
   0  -2   3    9.67    0.33 
   0  -2   3   10.26    0.36 
   0  -2   3    9.22    0.45 
  -1   2  -3    4.00    0.18 
  -1   2  -3    3.87    0.18 
  -1   2  -3    3.73    0.19 
   1  -2   3    4.04    0.19 
   1  -2   3    3.95    0.24 
   1  -2   3    3.90    0.19 
   1  -2   3    3.72    0.18 
  -2   2  -3    1.60    0.12 
  -2   2  -3    1.31    0.11 
   2  -2   3    1.32    0.11 
   2  -2   3    1.54    0.12 
   2  -2   3    1.16    0.12 
  -3   2  -3   30.03    0.93 
  -3   2  -3   28.78    0.97 
   3  -2   3   29.18    0.93 
   3  -2   3   28.51    0.99 
   3  -2   3   28.79    0.98 
  -4   2  -3   10.61    0.42 
  -4   2  -3   10.46    0.42 
   4  -2   3   10.34    0.42 
   4  -2   3   10.58    0.46 
   4  -2   3   10.67    0.43 
  -5   2  -3   16.19    0.59 
  -5   2  -3   16.27    0.59 
   5  -2   3   15.56    0.65 
   5  -2   3   15.43    0.60 
  -6   2  -3   12.34    0.50 
   6  -2   3   12.48    0.58 
   6  -2   3   12.63    0.55 
   6  -2   3   12.18    0.52 
  -7   2  -3   22.91    0.83 
   7  -2   3   22.62    0.92 
   7  -2   3   23.76    0.85 
   7  -2   3   21.26    0.93 
  -8   2  -3   31.60    1.11 
   8  -2   3   31.30    1.25 
   8  -2   3   29.57    1.24 
   8  -2   3   32.47    1.13 
  -9   2  -3    4.04    0.26 
   9  -2   3    3.56    0.40 
   9  -2   3    3.90    0.36 
   9  -2   3    4.10    0.37 
  10  -2   3    0.01    0.19 
  10  -2   3    0.08    0.14 
   9   1  -3   -0.01    0.26 
   9   1  -3   -0.11    0.17 
   8   1  -3    4.84    0.59 
   8   1  -3    5.21    0.33 
   8   1  -3    5.80    0.49 
   7   1  -3    2.49    0.42 
   7   1  -3    2.38    0.32 
   7   1  -3    2.04    0.21 
   6   1  -3   12.03    0.75 
   6   1  -3   11.44    0.48 
   6   1  -3   11.24    0.61 
   6   1  -3   12.39    0.49 
  -6  -1   3   12.27    0.44 
  -6  -1   3   11.85    0.49 
   5   1  -3    9.42    0.61 
   5   1  -3    9.69    0.39 
   5   1  -3    8.76    0.49 
   5   1  -3    9.60    0.38 
  -5  -1   3    9.22    0.35 
  -5  -1   3    9.34    0.61 
  -5  -1   3    9.07    0.39 
   4   1  -3    9.63    0.37 
   4   1  -3    9.61    0.47 
   4   1  -3    9.33    0.37 
   4   1  -3    9.41    0.57 
  -4  -1   3   10.05    0.36 
  -4  -1   3    9.39    0.38 
  -4  -1   3    9.88    0.57 
   3   1  -3    1.72    0.11 
   3   1  -3    1.44    0.17 
   3   1  -3    1.79    0.13 
   3   1  -3    2.25    0.30 
  -3  -1   3    1.73    0.27 
  -3  -1   3    1.63    0.10 
  -3  -1   3    1.59    0.13 
   2   1  -3   35.64    1.06 
   2   1  -3   35.48    1.12 
   2   1  -3   33.79    1.32 
   2   1  -3   33.02    1.18 
  -2  -1   3   35.47    1.13 
  -2  -1   3   35.72    1.11 
  -2  -1   3   34.53    1.06 
  -2  -1   3   34.59    1.33 
   1   1  -3  138.18    3.95 
   1   1  -3  137.42    4.21 
   1   1  -3  130.03    4.55 
   1   1  -3  138.85    4.26 
   1   1  -3  134.64    3.94 
  -1  -1   3  138.34    4.23 
  -1  -1   3  135.76    4.56 
  -1  -1   3  143.11    3.94 
  -1  -1   3  138.19    4.20 
   0   1  -3   38.19    1.15 
   0   1  -3   40.26    1.22 
   0   1  -3   37.44    1.24 
   0   1  -3   37.87    1.14 
   0  -1   3   39.31    1.21 
   0  -1   3   37.75    1.36 
   0  -1   3   37.51    1.15 
   0  -1   3   37.78    1.14 
   0  -1   3   38.10    1.24 
  -1   1  -3    2.32    0.14 
  -1   1  -3    2.34    0.13 
  -1   1  -3    2.43    0.14 
   1  -1   3    2.67    0.15 
   1  -1   3    2.39    0.14 
   1  -1   3    2.41    0.13 
  -2   1  -3    0.52    0.08 
  -2   1  -3    0.61    0.08 
  -2   1  -3    0.57    0.08 
   2  -1   3    0.65    0.09 
   2  -1   3    0.59    0.09 
   2  -1   3    0.58    0.08 
  -3   1  -3   16.94    0.61 
  -3   1  -3   16.59    0.57 
   3  -1   3   16.51    0.58 
   3  -1   3   16.67    0.61 
   3  -1   3   16.75    0.60 
  -4   1  -3    0.89    0.11 
  -4   1  -3    0.87    0.11 
  -4   1  -3    0.86    0.12 
   4  -1   3    0.77    0.10 
   4  -1   3    0.72    0.12 
   4  -1   3    0.67    0.11 
  -5   1  -3   70.71    2.05 
  -5   1  -3   68.05    2.18 
  -5   1  -3   63.48    2.14 
   5  -1   3   64.51    2.04 
   5  -1   3   70.51    2.18 
   5  -1   3   66.59    2.20 
  -6   1  -3   21.37    0.77 
  -6   1  -3   21.89    0.77 
   6  -1   3   21.68    0.81 
   6  -1   3   22.03    0.79 
   6  -1   3   21.80    0.85 
  -7   1  -3    3.73    0.22 
   7  -1   3    3.43    0.31 
   7  -1   3    3.67    0.26 
   7  -1   3    4.17    0.34 
  -8   1  -3   29.41    1.03 
   8  -1   3   28.69    1.16 
   8  -1   3   28.80    1.21 
   8  -1   3   28.97    1.05 
  -9   1  -3   19.59    0.78 
   9  -1   3   21.15    0.84 
   9  -1   3   20.70    0.95 
   9  -1   3   20.12    0.97 
  10  -1   3   18.25    0.80 
  10  -1   3   18.19    0.95 
  10  -1   3   19.23    0.95 
   9   0  -3   16.08    0.92 
   9   0  -3   16.69    1.02 
   8   0  -3    2.49    0.38 
   8   0  -3    2.42    0.42 
   8   0  -3    2.44    0.25 
   7   0  -3    7.40    0.52 
   7   0  -3    8.40    0.64 
   7   0  -3    7.41    0.38 
  -7   0   3    7.15    0.38 
   6   0  -3    3.16    0.35 
   6   0  -3    2.77    0.20 
   6   0  -3    2.93    0.39 
   6   0  -3    2.48    0.21 
  -6   0   3    2.56    0.17 
  -6   0   3    2.72    0.21 
  -6   0   3    2.98    0.40 
   5   0  -3    3.12    0.21 
   5   0  -3    3.04    0.19 
   5   0  -3    3.46    0.34 
   5   0  -3    2.73    0.36 
  -5   0   3    3.18    0.18 
  -5   0   3    3.12    0.39 
  -5   0   3    3.25    0.21 
   4   0  -3    5.71    0.43 
   4   0  -3    5.80    0.36 
   4   0  -3    6.32    0.28 
   4   0  -3    6.45    0.28 
  -4   0   3    6.03    0.26 
  -4   0   3    6.11    0.28 
  -4   0   3    6.65    0.46 
   3   0  -3    8.28    0.32 
   3   0  -3    7.94    0.41 
   3   0  -3    8.47    0.33 
   3   0  -3    8.27    0.48 
  -3   0   3    7.96    0.33 
  -3   0   3    8.10    0.48 
   2   0  -3   40.72    1.57 
   2   0  -3   44.96    1.37 
   2   0  -3   41.62    1.45 
   2   0  -3   43.80    1.30 
  -2   0   3   43.60    1.58 
  -2   0   3   43.87    1.31 
  -2   0   3   43.22    1.42 
   1   0  -3   17.88    0.58 
   1   0  -3   17.70    0.66 
   1   0  -3   18.08    0.61 
  -1   0   3   18.88    0.59 
  -1   0   3   18.15    0.61 
  -1   0   3   19.15    0.66 
  -1   0   3   17.48    0.74 
   0   0  -3    1.14    0.11 
   0   0  -3    0.96    0.09 
   0   0  -3    1.13    0.09 
   0   0  -3    1.21    0.11 
   0   0   3    1.21    0.13 
   0   0   3    0.96    0.09 
   0   0   3    1.10    0.08 
  -1   0  -3  115.15    3.41 
  -1   0  -3  108.98    3.39 
  -1   0  -3  115.02    3.18 
  -1   0  -3  107.03    3.17 
   1   0   3  115.00    3.42 
   1   0   3  101.33    3.39 
   1   0   3  106.93    3.18 
  -2   0  -3    0.30    0.07 
  -2   0  -3    0.23    0.05 
  -2   0  -3    0.31    0.06 
   2   0   3    0.39    0.07 
   2   0   3    0.34    0.07 
   2   0   3    0.26    0.06 
  -3   0  -3    0.78    0.09 
  -3   0  -3    0.70    0.09 
  -3   0  -3    0.61    0.08 
   3   0   3    0.72    0.09 
   3   0   3    0.84    0.11 
  -4   0  -3   34.09    1.16 
  -4   0  -3   35.70    1.18 
  -4   0  -3   36.52    1.12 
   4   0   3   33.88    1.19 
   4   0   3   37.25    1.18 
   4   0   3   35.72    1.12 
  -5   0  -3    2.86    0.17 
  -5   0  -3    3.08    0.20 
   5   0   3    2.86    0.20 
   5   0   3    2.91    0.22 
   5   0   3    3.00    0.19 
  -6   0  -3   13.81    0.52 
  -6   0  -3   14.06    0.53 
   6   0   3   13.39    0.54 
   6   0   3   12.69    0.58 
   6   0   3   13.64    0.55 
  -7   0  -3    3.15    0.23 
  -7   0  -3    3.40    0.20 
   7   0   3    3.56    0.26 
   7   0   3    3.20    0.34 
   7   0   3    3.64    0.33 
   7   0   3    3.36    0.24 
  -8   0  -3    1.69    0.15 
   8   0   3    1.60    0.22 
   8   0   3    1.45    0.29 
   8   0   3    1.55    0.24 
   9   0   3    2.22    0.30 
   9   0   3    2.59    0.28 
   9   0   3    2.07    0.34 
  10   0   3    1.79    0.34 
  10   0   3    1.53    0.34 
  10   0   3    1.57    0.24 
  11   0   3    0.12    0.22 
  11   0   3   -0.15    0.12 
  11   0   3    0.26    0.20 
   9  -1  -3    1.48    0.23 
   9  -1  -3    1.47    0.38 
   9  -1  -3    2.14    0.39 
   8  -1  -3    0.64    0.27 
   8  -1  -3    0.57    0.24 
   8  -1  -3    0.79    0.16 
   7  -1  -3    2.76    0.42 
   7  -1  -3    2.92    0.38 
   7  -1  -3    2.98    0.24 
   6  -1  -3    3.68    0.40 
   6  -1  -3    3.70    0.23 
   6  -1  -3    3.82    0.43 
   6  -1  -3    3.54    0.25 
  -6   1   3    4.10    0.26 
  -6   1   3    3.50    0.21 
  -6   1   3    3.50    0.42 
   5  -1  -3   15.97    0.76 
   5  -1  -3   17.38    0.84 
   5  -1  -3   17.62    0.64 
   5  -1  -3   16.37    0.62 
  -5   1   3   16.88    0.62 
  -5   1   3   17.68    0.85 
  -5   1   3   18.55    0.65 
   4  -1  -3   55.30    2.10 
   4  -1  -3   56.49    1.98 
   4  -1  -3   60.11    1.86 
   4  -1  -3   59.75    1.76 
  -4   1   3   57.64    2.13 
  -4   1   3   57.41    1.84 
  -4   1   3   58.03    1.77 
   3  -1  -3   69.58    2.10 
   3  -1  -3   71.58    2.48 
   3  -1  -3   73.81    2.22 
   3  -1  -3   68.24    2.33 
  -3   1   3   69.98    2.48 
  -3   1   3   70.51    2.11 
  -3   1   3   70.16    2.21 
   2  -1  -3  283.13    8.67 
   2  -1  -3  276.11    8.07 
  -2   1   3  281.49    8.64 
  -2   1   3  283.85    8.02 
  -2   1   3  287.54    8.65 
  -2   1   3  272.29    9.15 
   1  -1  -3   -0.13    0.03 
   1  -1  -3   -0.08    0.05 
   1  -1  -3   -0.11    0.07 
  -1   1   3   -0.22    0.09 
  -1   1   3   -0.12    0.03 
  -1   1   3   -0.10    0.06 
  -1   1   3   -0.09    0.05 
   0  -1  -3   17.81    0.59 
   0  -1  -3   18.87    0.61 
   0  -1  -3   18.55    0.60 
   0  -1  -3   18.35    0.65 
   0   1   3   18.34    0.61 
   0   1   3   18.03    0.66 
   0   1   3   18.52    0.59 
  -1  -1  -3   -0.08    0.05 
  -1  -1  -3   -0.17    0.04 
  -1  -1  -3   -0.10    0.05 
  -1  -1  -3   -0.07    0.03 
   1   1   3   -0.08    0.05 
   1   1   3   -0.08    0.04 
   1   1   3   -0.04    0.05 
   1   1   3   -0.07    0.05 
  -2  -1  -3    3.78    0.19 
  -2  -1  -3    3.81    0.18 
  -2  -1  -3    3.83    0.18 
   2   1   3    3.90    0.19 
   2   1   3    3.67    0.18 
   2   1   3    3.77    0.19 
  -3  -1  -3   39.26    1.30 
  -3  -1  -3   40.92    1.31 
  -3  -1  -3   41.68    1.24 
   3   1   3   42.53    1.32 
   3   1   3   39.09    1.25 
   3   1   3   40.86    1.32 
  -4  -1  -3    1.41    0.13 
  -4  -1  -3    1.28    0.10 
  -4  -1  -3    1.13    0.12 
   4   1   3    1.07    0.12 
   4   1   3    1.20    0.12 
  -5  -1  -3   13.11    0.49 
  -5  -1  -3   12.53    0.48 
   5   1   3   13.88    0.52 
   5   1   3   12.92    0.50 
   5   1   3   13.11    0.53 
  -6  -1  -3   11.20    0.43 
  -6  -1  -3   11.55    0.45 
   6   1   3   10.77    0.50 
   6   1   3   11.40    0.47 
   6   1   3   10.83    0.46 
  -7  -1  -3   35.00    1.19 
  -7  -1  -3   36.12    1.18 
   7   1   3   35.74    1.20 
   7   1   3   34.99    1.29 
   7   1   3   37.69    1.26 
  -8  -1  -3   68.21    2.19 
  -8  -1  -3   69.91    2.12 
   8   1   3   66.71    2.14 
   8   1   3   67.12    2.32 
   8   1   3   68.22    2.54 
   8   1   3   68.92    2.26 
   9   1   3   20.29    0.91 
   9   1   3   20.28    1.03 
   9   1   3   20.14    0.80 
  10   1   3    0.76    0.25 
  10   1   3    1.06    0.30 
  10   1   3    0.75    0.19 
   9  -2  -3   15.65    0.93 
   9  -2  -3   15.32    0.70 
   8  -2  -3    5.82    0.57 
   8  -2  -3    5.38    0.36 
   7  -2  -3    9.79    0.64 
   7  -2  -3   10.43    0.48 
  -7   2   3   10.45    0.45 
   6  -2  -3   24.77    1.08 
   6  -2  -3   25.39    0.89 
  -6   2   3   25.77    0.89 
  -6   2   3   24.44    1.13 
   5  -2  -3    0.73    0.13 
   5  -2  -3    0.74    0.11 
   5  -2  -3    0.90    0.20 
  -5   2   3    0.83    0.13 
  -5   2   3    0.87    0.12 
  -5   2   3    0.67    0.19 
   4  -2  -3    7.62    0.33 
   4  -2  -3    7.57    0.34 
   4  -2  -3    7.85    0.45 
  -4   2   3    7.76    0.47 
  -4   2   3    7.28    0.32 
  -4   2   3    7.83    0.35 
   3  -2  -3    0.01    0.06 
   3  -2  -3    0.03    0.10 
   3  -2  -3   -0.01    0.03 
  -3   2   3   -0.01    0.07 
  -3   2   3    0.07    0.06 
  -3   2   3    0.07    0.04 
  -3   2   3    0.46    0.15 
   2  -2  -3    0.49    0.12 
   2  -2  -3    0.35    0.06 
   2  -2  -3    0.36    0.08 
  -2   2   3    0.54    0.09 
  -2   2   3    0.31    0.09 
  -2   2   3    0.39    0.13 
  -2   2   3    0.43    0.07 
   1  -2  -3   88.95    2.63 
   1  -2  -3   89.49    2.86 
   1  -2  -3   90.88    2.79 
  -1   2   3   90.61    2.87 
  -1   2   3   91.15    2.63 
  -1   2   3   89.28    2.79 
   0  -2  -3    0.29    0.07 
   0  -2  -3    0.51    0.06 
   0  -2  -3    0.25    0.08 
   0   2   3    0.43    0.07 
   0   2   3    0.33    0.07 
   0   2   3    0.41    0.10 
  -1  -2  -3    1.30    0.10 
  -1  -2  -3    1.12    0.09 
  -1  -2  -3    1.24    0.08 
  -1  -2  -3    1.27    0.11 
   1   2   3    1.08    0.10 
   1   2   3    1.09    0.09 
   1   2   3    0.80    0.09 
   1   2   3    1.37    0.10 
  -2  -2  -3   30.89    0.96 
  -2  -2  -3   31.41    0.95 
  -2  -2  -3   32.04    1.00 
  -2  -2  -3   30.23    1.00 
   2   2   3   30.82    0.96 
   2   2   3   30.72    1.02 
   2   2   3   31.18    1.01 
  -3  -2  -3    2.28    0.13 
  -3  -2  -3    2.35    0.12 
  -3  -2  -3    2.14    0.14 
   3   2   3    2.28    0.14 
   3   2   3    2.24    0.14 
   3   2   3    2.35    0.15 
  -4  -2  -3   19.48    0.63 
  -4  -2  -3   18.72    0.64 
   4   2   3   18.90    0.67 
   4   2   3   18.43    0.66 
   4   2   3   18.50    0.64 
  -5  -2  -3   63.33    1.91 
   5   2   3   62.50    1.92 
   5   2   3   64.13    2.03 
  -6  -2  -3    8.83    0.34 
  -6  -2  -3    8.76    0.38 
   6   2   3    9.13    0.39 
   6   2   3    8.25    0.41 
   6   2   3    9.51    0.40 
  -7  -2  -3   11.06    0.42 
  -7  -2  -3   11.06    0.45 
   7   2   3   10.73    0.51 
   7   2   3   10.86    0.47 
   7   2   3   10.41    0.47 
  -8  -2  -3    0.26    0.06 
  -8  -2  -3    0.43    0.11 
   8   2   3    0.04    0.18 
   8   2   3    0.23    0.14 
   8   2   3    0.44    0.13 
   8   2   3    0.26    0.11 
   9   2   3    0.55    0.15 
   9   2   3    0.30    0.24 
   9   2   3    0.32    0.16 
  10   2   3    1.22    0.21 
  10   2   3    1.38    0.37 
  10   2   3    1.06    0.24 
   9  -3  -3    3.77    0.37 
   9  -3  -3    3.89    0.52 
   8  -3  -3   -0.15    0.18 
   8  -3  -3    0.13    0.11 
   7  -3  -3   15.38    0.82 
   7  -3  -3   13.83    0.60 
  -7   3   3   13.34    0.57 
  -7   3   3   14.29    0.80 
   6  -3  -3    2.49    0.25 
   6  -3  -3    2.26    0.33 
  -6   3   3    2.17    0.33 
  -6   3   3    2.28    0.18 
   5  -3  -3    0.45    0.12 
   5  -3  -3    0.35    0.17 
  -5   3   3    0.25    0.07 
  -5   3   3    0.49    0.18 
   4  -3  -3    6.59    0.32 
   4  -3  -3    6.50    0.42 
   4  -3  -3    7.03    0.31 
  -4   3   3    6.76    0.43 
  -4   3   3    6.75    0.33 
  -4   3   3    6.95    0.31 
   3  -3  -3  117.16    3.82 
   3  -3  -3  121.23    3.69 
   3  -3  -3  118.03    3.47 
  -3   3   3  113.83    3.69 
  -3   3   3  128.01    3.49 
  -3   3   3  114.79    3.99 
  -3   3   3  117.47    3.80 
   2  -3  -3   23.28    0.79 
   2  -3  -3   23.15    0.88 
   2  -3  -3   22.95    0.77 
  -2   3   3   22.48    0.79 
  -2   3   3   25.73    0.90 
  -2   3   3   23.39    0.77 
   1  -3  -3    2.83    0.14 
   1  -3  -3    2.71    0.16 
   1  -3  -3    2.91    0.21 
  -1   3   3    2.85    0.16 
  -1   3   3    2.78    0.22 
  -1   3   3    2.87    0.15 
   0  -3  -3   70.06    2.27 
   0  -3  -3   71.35    2.11 
   0  -3  -3   73.26    2.23 
   0   3   3   72.76    2.30 
   0   3   3   71.46    2.24 
   0   3   3   72.28    2.11 
  -1  -3  -3   10.81    0.36 
  -1  -3  -3    9.68    0.36 
  -1  -3  -3   10.12    0.37 
   1   3   3   10.22    0.40 
   1   3   3    9.93    0.36 
   1   3   3   10.17    0.36 
  -2  -3  -3    0.11    0.05 
  -2  -3  -3    0.17    0.04 
  -2  -3  -3    0.14    0.04 
  -2  -3  -3    0.09    0.05 
   2   3   3    0.06    0.05 
   2   3   3    0.09    0.04 
   2   3   3    0.16    0.05 
  -3  -3  -3   33.22    0.97 
  -3  -3  -3   31.26    1.00 
  -3  -3  -3   31.39    1.00 
  -3  -3  -3   31.02    0.98 
   3   3   3   30.51    0.98 
   3   3   3   30.78    1.03 
   3   3   3   32.48    1.04 
  -4  -3  -3   10.69    0.40 
  -4  -3  -3   10.72    0.37 
   4   3   3   10.45    0.41 
   4   3   3   10.29    0.40 
   4   3   3   11.05    0.41 
  -5  -3  -3   34.10    1.10 
  -5  -3  -3   35.54    1.11 
   5   3   3   34.63    1.11 
   5   3   3   36.38    1.17 
   5   3   3   34.08    1.18 
  -6  -3  -3    1.86    0.11 
  -6  -3  -3    1.96    0.16 
   6   3   3    2.18    0.16 
   6   3   3    1.84    0.18 
   6   3   3    2.17    0.18 
  -7  -3  -3    3.05    0.16 
  -7  -3  -3    3.14    0.21 
   7   3   3    2.96    0.21 
   7   3   3    3.34    0.23 
   7   3   3    2.92    0.25 
  -8  -3  -3    0.88    0.13 
   8   3   3    0.95    0.30 
   8   3   3    1.03    0.16 
   8   3   3    0.93    0.19 
   9   3   3    3.32    0.28 
   9   3   3    3.98    0.52 
   9   3   3    3.89    0.35 
  10   3   3   11.88    0.68 
  10   3   3   13.07    0.88 
   9  -4  -3    1.11    0.22 
   9  -4  -3    1.20    0.36 
   8  -4  -3   22.54    1.14 
   8  -4  -3   22.49    0.90 
   7  -4  -3   27.81    1.33 
   7  -4  -3   33.51    1.14 
  -7   4   3   31.73    1.13 
  -7   4   3   31.73    1.36 
   6  -4  -3    1.92    0.23 
   6  -4  -3    1.87    0.32 
  -6   4   3    2.27    0.19 
  -6   4   3    1.97    0.30 
   5  -4  -3    3.67    0.24 
   5  -4  -3    2.07    0.28 
  -5   4   3    3.24    0.35 
  -5   4   3    3.23    0.21 
   4  -4  -3   14.43    0.69 
   4  -4  -3   14.48    0.56 
  -4   4   3   14.62    0.69 
  -4   4   3   14.46    0.55 
   3  -4  -3    6.03    0.29 
   3  -4  -3    6.56    0.39 
  -3   4   3    6.36    0.38 
  -3   4   3    5.98    0.28 
  -3   4   3    5.67    0.37 
  -3   4   3    6.34    0.30 
   2  -4  -3   31.78    1.05 
   2  -4  -3   32.14    1.02 
   2  -4  -3   31.42    1.15 
  -2   4   3   32.29    1.02 
  -2   4   3   31.11    1.05 
  -2   4   3   32.89    1.17 
   1  -4  -3    9.91    0.37 
   1  -4  -3   10.12    0.43 
  -1   4   3   10.13    0.38 
  -1   4   3    9.57    0.37 
   0  -4  -3    0.41    0.06 
   0  -4  -3    0.36    0.07 
   0  -4  -3    0.20    0.06 
   0   4   3    0.32    0.05 
   0   4   3    0.41    0.07 
   0   4   3    0.23    0.08 
  -1  -4  -3  301.87    9.24 
  -1  -4  -3  304.25    8.63 
  -1  -4  -3  306.25    8.62 
  -1  -4  -3  296.07    9.25 
   1   4   3  315.99    8.67 
   1   4   3  286.48    9.26 
   1   4   3  309.40    9.28 
  -2  -4  -3   25.11    0.79 
  -2  -4  -3   24.85    0.80 
  -2  -4  -3   25.33    0.80 
  -2  -4  -3   25.11    0.81 
   2   4   3   25.84    0.85 
   2   4   3   27.70    0.79 
   2   4   3   23.85    0.82 
  -3  -4  -3   64.02    1.93 
  -3  -4  -3   65.46    1.93 
  -3  -4  -3   65.54    2.01 
  -3  -4  -3   66.98    2.01 
   3   4   3   64.62    1.94 
   3   4   3   63.89    2.05 
   3   4   3   67.43    2.06 
  -4  -4  -3   33.15    1.01 
  -4  -4  -3   32.74    1.02 
  -4  -4  -3   33.31    1.02 
   4   4   3   32.16    1.08 
   4   4   3   33.16    1.08 
   4   4   3   32.24    1.03 
  -5  -4  -3    0.42    0.04 
  -5  -4  -3    0.30    0.07 
   5   4   3    0.39    0.08 
   5   4   3    0.35    0.08 
   5   4   3    0.41    0.09 
  -6  -4  -3    7.74    0.26 
  -6  -4  -3    7.64    0.33 
   6   4   3    7.75    0.35 
   6   4   3    7.66    0.35 
  -7  -4  -3   12.69    0.48 
   7   4   3   12.10    0.50 
   7   4   3   12.60    0.52 
   7   4   3   12.39    0.54 
   8   4   3    0.16    0.12 
   8   4   3    0.34    0.25 
   8   4   3    0.19    0.10 
   9   4   3   20.08    0.86 
   9   4   3   19.23    1.10 
  10   4   3    0.52    0.19 
  10   4   3    0.30    0.28 
   8  -5  -3   21.23    1.10 
   8  -5  -3   20.50    0.86 
   7  -5  -3    6.31    0.40 
   7  -5  -3    6.66    0.57 
  -7   5   3    7.62    0.53 
  -7   5   3    7.02    0.38 
   6  -5  -3    4.71    0.31 
   6  -5  -3    4.01    0.43 
  -6   5   3    4.35    0.40 
  -6   5   3    4.05    0.27 
   5  -5  -3    0.82    0.14 
   5  -5  -3    0.63    0.19 
  -5   5   3    1.07    0.14 
  -5   5   3    0.83    0.20 
   4  -5  -3    3.91    0.34 
   4  -5  -3    4.07    0.26 
  -4   5   3    3.87    0.23 
  -4   5   3    4.23    0.33 
   3  -5  -3    0.61    0.15 
   3  -5  -3    0.49    0.11 
  -3   5   3    0.51    0.08 
  -3   5   3    0.95    0.19 
  -3   5   3    0.62    0.16 
   2  -5  -3  120.99    3.99 
   2  -5  -3  124.18    3.67 
  -2   5   3  130.16    3.68 
  -2   5   3  121.97    3.90 
  -2   5   3  131.17    4.04 
   1  -5  -3  144.13    4.57 
   1  -5  -3  141.62    4.24 
  -1   5   3  152.02    4.25 
  -1   5   3  144.56    4.52 
  -1   5   3  150.15    4.64 
   0  -5  -3   42.17    1.29 
   0  -5  -3   40.69    1.24 
   0  -5  -3   40.18    1.33 
   0   5   3   40.92    1.39 
   0   5   3   39.67    1.30 
   0   5   3   41.13    1.25 
  -1  -5  -3   69.14    2.08 
  -1  -5  -3   67.07    1.99 
  -1  -5  -3   67.83    2.10 
  -1  -5  -3   67.15    2.01 
   1   5   3   65.30    2.11 
   1   5   3   68.44    2.16 
   1   5   3   68.14    2.00 
  -2  -5  -3   10.61    0.39 
  -2  -5  -3   11.14    0.38 
   2   5   3   10.38    0.38 
   2   5   3   11.15    0.38 
   2   5   3   10.95    0.42 
  -3  -5  -3    0.50    0.08 
  -3  -5  -3    0.48    0.07 
   3   5   3    0.45    0.06 
   3   5   3    0.49    0.08 
   3   5   3    0.49    0.08 
  -4  -5  -3    4.32    0.20 
  -4  -5  -3    4.51    0.21 
   4   5   3    4.42    0.21 
   4   5   3    4.21    0.21 
   4   5   3    4.34    0.21 
  -5  -5  -3   31.14    0.98 
  -5  -5  -3   32.19    0.98 
   5   5   3   31.42    1.00 
   5   5   3   30.38    1.05 
   5   5   3   31.39    1.05 
  -6  -5  -3    1.52    0.13 
   6   5   3    1.50    0.16 
   6   5   3    1.79    0.17 
   6   5   3    1.35    0.15 
  -7  -5  -3   18.58    0.65 
   7   5   3   19.51    0.71 
   7   5   3   17.79    0.72 
   7   5   3   18.70    0.68 
   8   5   3   -0.16    0.23 
   8   5   3    0.14    0.09 
   8   5   3    0.08    0.10 
   9   5   3   10.53    0.81 
   9   5   3   10.02    0.55 
  10   5   3    0.02    0.15 
   8  -6  -3    2.03    0.40 
   8  -6  -3    1.48    0.24 
   7  -6  -3    0.21    0.12 
   7  -6  -3    0.30    0.21 
  -7   6   3    0.12    0.08 
   6  -6  -3   15.07    0.79 
   6  -6  -3   13.78    0.61 
  -6   6   3   13.93    0.71 
  -6   6   3   13.27    0.58 
   5  -6  -3   -0.24    0.12 
   5  -6  -3    0.05    0.10 
  -5   6   3   -0.01    0.06 
  -5   6   3    0.11    0.13 
   4  -6  -3    4.24    0.27 
   4  -6  -3    5.66    0.39 
  -4   6   3    4.10    0.25 
  -4   6   3    4.91    0.34 
   3  -6  -3   12.00    0.57 
   3  -6  -3   11.00    0.47 
  -3   6   3   12.28    0.60 
  -3   6   3   11.66    0.47 
   2  -6  -3    1.28    0.17 
   2  -6  -3    1.90    0.16 
  -2   6   3    1.77    0.14 
  -2   6   3    1.78    0.23 
   1  -6  -3    0.01    0.05 
   1  -6  -3    0.17    0.07 
  -1   6   3    0.10    0.09 
  -1   6   3    0.12    0.06 
  -1   6   3    0.14    0.05 
   0  -6  -3    4.59    0.22 
   0  -6  -3    4.43    0.22 
   0   6   3    4.97    0.23 
   0   6   3    4.88    0.29 
   0   6   3    4.58    0.21 
  -1  -6  -3   32.17    1.02 
  -1  -6  -3   33.01    1.04 
  -1  -6  -3   33.41    1.03 
  -1  -6  -3   34.45    1.03 
   1   6   3   33.90    1.03 
   1   6   3   33.90    1.14 
   1   6   3   31.83    1.07 
  -2  -6  -3    3.18    0.16 
  -2  -6  -3    3.53    0.18 
   2   6   3    3.42    0.16 
   2   6   3    3.41    0.17 
   2   6   3    3.42    0.19 
  -3  -6  -3   21.56    0.69 
  -3  -6  -3   21.02    0.68 
   3   6   3   21.29    0.71 
   3   6   3   21.62    0.74 
  -4  -6  -3    4.37    0.20 
  -4  -6  -3    4.65    0.20 
   4   6   3    4.68    0.22 
   4   6   3    4.53    0.22 
   4   6   3    4.28    0.21 
  -5  -6  -3    1.33    0.11 
  -5  -6  -3    1.14    0.11 
   5   6   3    1.17    0.12 
   5   6   3    1.18    0.12 
   5   6   3    1.39    0.13 
  -6  -6  -3   -0.01    0.04 
  -6  -6  -3    0.05    0.06 
   6   6   3   -0.04    0.06 
   6   6   3    0.01    0.06 
   6   6   3    0.03    0.07 
   7   6   3    0.72    0.12 
   7   6   3    0.80    0.12 
   8   6   3    2.88    0.48 
   8   6   3    2.23    0.25 
   9   6   3    5.00    0.38 
   9   6   3    5.37    0.66 
   8  -7  -3   10.48    0.58 
  -8   7   3   10.73    0.55 
   7  -7  -3   13.62    0.64 
  -7   7   3   13.18    0.60 
   6  -7  -3   20.89    0.81 
   6  -7  -3   19.47    0.97 
  -6   7   3   19.24    0.78 
   5  -7  -3   21.32    0.82 
   5  -7  -3   22.44    0.99 
  -5   7   3   22.33    0.94 
  -5   7   3   21.00    0.82 
   4  -7  -3    7.20    0.37 
   4  -7  -3    7.17    0.46 
  -4   7   3    6.87    0.35 
  -4   7   3    7.58    0.44 
   3  -7  -3    2.95    0.22 
   3  -7  -3    3.00    0.27 
  -3   7   3    2.92    0.20 
  -3   7   3    3.21    0.33 
   2  -7  -3   13.12    0.56 
   2  -7  -3   13.28    0.51 
  -2   7   3   13.16    0.51 
  -2   7   3   13.83    0.65 
   1  -7  -3    4.59    0.24 
   1  -7  -3    4.65    0.23 
  -1   7   3    4.79    0.33 
  -1   7   3    4.13    0.22 
   0  -7  -3    3.52    0.19 
   0  -7  -3    3.83    0.17 
   0   7   3    3.79    0.27 
   0   7   3    3.87    0.21 
   0   7   3    3.67    0.19 
  -1  -7  -3   29.66    0.96 
  -1  -7  -3   32.08    0.99 
   1   7   3   32.19    0.98 
   1   7   3   32.21    1.10 
   1   7   3   29.83    1.01 
  -2  -7  -3   50.89    1.52 
  -2  -7  -3   47.72    1.50 
   2   7   3   51.65    1.65 
   2   7   3   49.32    1.60 
   2   7   3   53.62    1.52 
  -3  -7  -3   25.74    0.80 
   3   7   3   26.12    0.89 
   3   7   3   26.30    0.86 
  -4  -7  -3    0.25    0.05 
  -4  -7  -3    0.21    0.05 
   4   7   3    0.22    0.06 
   4   7   3    0.24    0.07 
  -5  -7  -3    5.95    0.25 
  -5  -7  -3    6.38    0.25 
   5   7   3    6.59    0.29 
   5   7   3    6.69    0.29 
  -6  -7  -3   11.17    0.40 
   6   7   3   11.10    0.45 
   6   7   3   11.29    0.46 
   6   7   3   10.92    0.42 
  -7  -7  -3    5.39    0.25 
  -8  -7  -3    0.12    0.07 
   8   7   3   -0.08    0.25 
   8   7   3    0.13    0.11 
  -9  -7  -3    4.33    0.25 
   9   7   3    4.10    0.34 
   7  -8  -3    7.72    0.47 
  -7   8   3    7.53    0.43 
   6  -8  -3    6.19    0.39 
  -6   8   3    6.62    0.37 
   5  -8  -3    5.19    0.34 
  -5   8   3    4.96    0.31 
   4  -8  -3    2.30    0.28 
   4  -8  -3    1.80    0.21 
  -4   8   3    1.83    0.25 
  -4   8   3    1.60    0.18 
   3  -8  -3    2.85    0.22 
   3  -8  -3    2.81    0.24 
  -3   8   3    3.11    0.21 
  -3   8   3    3.29    0.35 
   2  -8  -3   12.42    0.52 
   2  -8  -3   11.42    0.48 
  -2   8   3   11.65    0.48 
  -2   8   3   13.57    0.64 
   1  -8  -3   19.61    0.72 
   1  -8  -3   21.80    0.73 
  -1   8   3   23.43    0.91 
  -1   8   3   20.29    0.74 
   0  -8  -3   10.41    0.40 
   0   8   3   10.54    0.51 
   0   8   3   10.43    0.41 
  -1  -8  -3    3.78    0.21 
  -1  -8  -3    3.91    0.19 
   1   8   3    3.59    0.26 
   1   8   3    3.61    0.19 
  -2  -8  -3    2.68    0.15 
  -2  -8  -3    3.15    0.17 
   2   8   3    2.49    0.20 
   2   8   3    2.97    0.16 
   2   8   3    2.71    0.15 
  -3  -8  -3   17.06    0.55 
  -3  -8  -3   16.59    0.54 
   3   8   3   16.38    0.58 
   3   8   3   17.62    0.63 
  -4  -8  -3   20.41    0.64 
  -4  -8  -3   21.07    0.64 
   4   8   3   20.70    0.73 
   4   8   3   20.32    0.70 
  -5  -8  -3    1.38    0.09 
  -5  -8  -3    1.20    0.09 
   5   8   3    1.29    0.13 
   5   8   3    1.30    0.13 
  -6  -8  -3    1.99    0.11 
   6   8   3    2.04    0.17 
   6   8   3    2.09    0.17 
  -7  -8  -3   12.93    0.44 
   7   8   3   13.34    0.55 
  -8  -8  -3    0.58    0.08 
   8   8   3    0.35    0.13 
   7  -9  -3    0.00    0.10 
  -7   9   3    0.10    0.09 
  -6   9   3    7.47    0.42 
   5  -9  -3    0.69    0.15 
  -5   9   3    0.70    0.15 
   4  -9  -3    1.80    0.22 
  -4   9   3    2.19    0.22 
   3  -9  -3   23.60    0.86 
  -3   9   3   24.02    0.88 
   2  -9  -3   29.66    1.00 
   2  -9  -3   28.29    0.97 
  -2   9   3   27.46    0.99 
   1  -9  -3    0.32    0.09 
  -1   9   3    0.46    0.15 
  -1   9   3    0.52    0.09 
   0  -9  -3   66.15    1.99 
   0   9   3   67.22    2.26 
   0   9   3   65.68    2.11 
  -1  -9  -3   38.60    1.21 
  -1  -9  -3   40.78    1.24 
   1   9   3   40.08    1.40 
   1   9   3   38.67    1.29 
  -2  -9  -3   21.11    0.67 
   2   9   3   20.50    0.72 
   2   9   3   21.82    0.80 
  -3  -9  -3    0.07    0.04 
  -3  -9  -3    0.05    0.04 
   3   9   3    0.12    0.08 
   3   9   3    0.09    0.05 
   4   9   3   13.26    0.50 
   4   9   3   14.40    0.54 
   5   9   3   12.89    0.51 
   5   9   3   13.11    0.49 
   6   9   3    1.72    0.17 
   7   9   3    6.36    0.33 
   7   9   3    6.94    0.78 
   6 -10  -3   -0.05    0.11 
  -6  10   3    0.01    0.09 
   5 -10  -3    3.95    0.31 
  -5  10   3    3.54    0.28 
   4 -10  -3    1.55    0.21 
  -4  10   3    2.11    0.22 
   3 -10  -3    1.11    0.17 
  -3  10   3    1.29    0.17 
   2 -10  -3    3.00    0.23 
  -2  10   3    2.52    0.20 
   1 -10  -3    1.75    0.18 
  -1  10   3    1.87    0.18 
   0 -10  -3   10.03    0.40 
   0  10   3    9.91    0.41 
  -1 -10  -3    6.97    0.29 
   1  10   3    6.78    0.30 
   1  10   3    6.76    0.41 
  -2 -10  -3   17.75    0.57 
   2  10   3   17.83    0.63 
   2  10   3   17.52    0.72 
  -3 -10  -3    0.03    0.03 
   3  10   3    0.12    0.09 
   3  10   3    0.17    0.06 
   4  10   3    1.64    0.17 
   4  10   3    1.48    0.13 
   5  10   3    0.27    0.08 
   6  10   3    0.27    0.08 
   7  10   3    0.51    0.11 
   5 -11  -3    0.18    0.13 
  -5  11   3    0.22    0.11 
   4 -11  -3    1.10    0.19 
  -4  11   3    0.97    0.17 
   3 -11  -3    3.47    0.27 
  -3  11   3    3.46    0.25 
   2 -11  -3    0.30    0.10 
  -2  11   3    0.07    0.07 
   1 -11  -3    3.43    0.23 
  -1  11   3    3.24    0.22 
   0 -11  -3    4.22    0.24 
   0  11   3    4.12    0.24 
  -1 -11  -3    3.37    0.19 
   1  11   3    3.50    0.21 
  -2 -11  -3   29.54    0.89 
   2  11   3   28.94    0.99 
   3  11   3    0.66    0.09 
   4  11   3   20.97    0.73 
   5  11   3    0.35    0.08 
   3 -12  -3    1.78    0.22 
  -3  12   3    1.14    0.17 
   2 -12  -3    2.73    0.25 
  -2  12   3    2.48    0.22 
   1 -12  -3    1.37    0.16 
  -1  12   3    0.82    0.14 
   0 -12  -3    0.87    0.12 
   0  12   3    0.70    0.12 
  -1 -12  -3   -0.04    0.05 
   1  12   3   -0.04    0.06 
   2  12   3   20.15    0.72 
   3  12   3    0.28    0.08 
   4  12   3    0.32    0.08 
   2  10  -4    2.23    0.39 
   2  10  -4    2.00    0.15 
   1  10  -4    6.30    0.56 
   1  10  -4    5.73    0.28 
   0  10  -4    7.69    0.60 
   0  10  -4    6.90    0.33 
  -1  10  -4    0.03    0.07 
   1 -10   4   -0.02    0.05 
  -2  10  -4    0.18    0.09 
   2 -10   4    0.14    0.08 
  -3  10  -4    1.04    0.15 
   3 -10   4    1.06    0.16 
  -4  10  -4    2.92    0.24 
   4 -10   4    2.73    0.26 
  -5  10  -4    0.40    0.12 
   5 -10   4    0.11    0.12 
   4   9  -4    2.39    0.19 
   3   9  -4    1.66    0.15 
   3   9  -4    1.86    0.41 
   2   9  -4    0.11    0.06 
   2   9  -4    0.14    0.07 
   2   9  -4    0.29    0.23 
   1   9  -4    0.02    0.06 
   1   9  -4    0.08    0.06 
   1   9  -4    0.06    0.17 
   0   9  -4    0.91    0.24 
   0   9  -4    0.58    0.10 
  -1   9  -4   -0.02    0.14 
  -1   9  -4    0.19    0.08 
   1  -9   4    0.05    0.06 
  -2   9  -4    3.22    0.22 
   2  -9   4    3.60    0.23 
  -3   9  -4    1.08    0.15 
   3  -9   4    0.82    0.14 
  -4   9  -4    1.40    0.17 
   4  -9   4    1.18    0.18 
  -5   9  -4    3.56    0.27 
   5  -9   4    4.35    0.31 
  -6   9  -4    0.36    0.13 
   6  -9   4    0.22    0.13 
   5   8  -4    0.33    0.11 
   4   8  -4    0.37    0.11 
   4   8  -4    0.41    0.27 
   3   8  -4    0.74    0.11 
   3   8  -4    1.32    0.34 
   3   8  -4    0.65    0.08 
   2   8  -4    2.28    0.40 
   2   8  -4    2.31    0.16 
   2   8  -4    2.03    0.14 
   1   8  -4   10.17    0.65 
   1   8  -4    9.43    0.39 
   1   8  -4    9.62    0.39 
   0   8  -4    8.22    0.54 
   0   8  -4    7.79    0.34 
  -1   8  -4   15.84    0.73 
  -1   8  -4   14.64    0.56 
  -1   8  -4   13.68    0.51 
  -1   8  -4   14.62    0.58 
   1  -8   4   15.06    0.53 
  -2   8  -4   34.34    1.21 
  -2   8  -4   31.10    1.13 
   2  -8   4   33.68    1.08 
  -3   8  -4    4.78    0.28 
   3  -8   4    5.72    0.31 
  -4   8  -4   34.84    1.22 
   4  -8   4   34.98    1.19 
  -5   8  -4    1.72    0.19 
   5  -8   4    1.51    0.21 
  -6   8  -4   -0.01    0.08 
   6  -8   4    0.01    0.11 
  -7   8  -4   -0.01    0.08 
   7  -8   4    0.11    0.13 
   6   7  -4   12.13    0.60 
   5   7  -4    0.77    0.16 
   5   7  -4    0.98    0.33 
   4   7  -4    0.42    0.11 
   4   7  -4    0.38    0.07 
   4   7  -4    0.54    0.26 
   3   7  -4    6.86    0.59 
   3   7  -4    5.84    0.25 
   3   7  -4    5.61    0.29 
   2   7  -4    2.22    0.14 
   2   7  -4    2.16    0.16 
   2   7  -4    1.81    0.32 
   1   7  -4   35.15    1.06 
   1   7  -4   34.79    1.19 
   1   7  -4   36.94    1.50 
   1   7  -4   36.46    1.06 
   1   7  -4   36.93    1.18 
   0   7  -4   53.75    1.60 
   0   7  -4   52.89    1.74 
   0   7  -4   54.67    2.03 
   0   7  -4   54.83    1.61 
  -1   7  -4    9.13    0.40 
  -1   7  -4    9.24    0.39 
  -1   7  -4    9.46    0.52 
   1  -7   4    8.89    0.37 
  -2   7  -4   15.46    0.60 
  -2   7  -4   15.96    0.63 
   2  -7   4   15.91    0.58 
  -3   7  -4    1.67    0.19 
  -3   7  -4    1.73    0.17 
   3  -7   4    2.00    0.20 
  -4   7  -4    1.59    0.18 
   4  -7   4    1.47    0.18 
  -5   7  -4    3.28    0.24 
   5  -7   4    3.88    0.28 
  -6   7  -4    1.30    0.18 
   6  -7   4    1.33    0.21 
  -7   7  -4    1.31    0.18 
   7  -7   4    1.96    0.27 
  -8   7  -4    1.77    0.22 
   8  -7   4    1.66    0.25 
   6   6  -4    1.60    0.24 
   6   6  -4    2.17    0.46 
   5   6  -4    2.45    0.45 
   5   6  -4    2.60    0.27 
   4   6  -4    0.14    0.20 
   4   6  -4   -0.02    0.09 
   4   6  -4    0.06    0.05 
   3   6  -4    6.91    0.28 
   3   6  -4    7.03    0.34 
   3   6  -4    7.26    0.59 
   3   6  -4    6.79    0.23 
   3   6  -4    6.83    0.23 
   2   6  -4    2.80    0.20 
   2   6  -4    4.12    0.47 
   2   6  -4    3.36    0.17 
   2   6  -4    3.29    0.14 
   2   6  -4    3.23    0.13 
   1   6  -4    2.10    0.12 
   1   6  -4    2.08    0.30 
   1   6  -4    2.04    0.14 
   1   6  -4    1.90    0.15 
   1   6  -4    1.98    0.11 
   0   6  -4   31.97    0.99 
   0   6  -4   32.14    0.98 
   0   6  -4   33.10    1.29 
   0   6  -4   32.62    1.07 
   0   6  -4   30.64    1.07 
   0  -6   4   31.56    0.99 
  -1   6  -4    8.50    0.37 
  -1   6  -4    9.10    0.49 
   1  -6   4    9.29    0.36 
  -2   6  -4    9.73    0.41 
  -2   6  -4   10.15    0.43 
   2  -6   4    9.71    0.40 
  -3   6  -4    6.75    0.33 
  -3   6  -4    7.00    0.35 
   3  -6   4    6.43    0.31 
   3  -6   4    6.39    0.33 
  -4   6  -4   11.50    0.51 
  -4   6  -4   10.38    0.46 
   4  -6   4   10.53    0.49 
   4  -6   4   11.16    0.48 
  -5   6  -4    1.00    0.18 
  -5   6  -4    1.14    0.16 
   5  -6   4    1.00    0.18 
   5  -6   4    0.43    0.13 
  -6   6  -4   24.25    0.89 
   6  -6   4   22.45    0.98 
   6  -6   4   23.41    0.89 
  -7   6  -4    0.87    0.15 
   7  -6   4    0.71    0.17 
  -8   6  -4   13.80    0.63 
   8  -6   4   14.29    0.67 
  -9   6  -4    3.78    0.30 
   9  -6   4    3.45    0.37 
   7   5  -4    0.15    0.17 
   6   5  -4    0.95    0.20 
   6   5  -4    1.14    0.36 
   5   5  -4    9.08    0.72 
   5   5  -4    7.56    0.34 
   5   5  -4    7.05    0.43 
   4   5  -4   10.01    0.38 
   4   5  -4    9.98    0.35 
   4   5  -4    9.70    0.71 
   4   5  -4    9.59    0.47 
   3   5  -4    3.22    0.23 
   3   5  -4    3.57    0.18 
   3   5  -4    3.09    0.42 
   3   5  -4    3.33    0.17 
   3   5  -4    3.54    0.15 
   2   5  -4    0.45    0.07 
   2   5  -4    0.32    0.09 
   2   5  -4    0.43    0.07 
   2   5  -4    0.51    0.06 
   2   5  -4    0.64    0.22 
   1   5  -4   -0.02    0.05 
   1   5  -4    0.01    0.04 
   1   5  -4    0.01    0.04 
   1   5  -4    0.03    0.13 
   1   5  -4    0.02    0.03 
   0   5  -4    1.83    0.13 
   0   5  -4    1.67    0.24 
   0   5  -4    2.03    0.13 
   0   5  -4    1.87    0.14 
   0   5  -4    2.03    0.15 
   0  -5   4    1.81    0.14 
   0  -5   4    1.74    0.24 
  -1   5  -4   83.23    2.86 
  -1   5  -4   82.10    2.63 
  -1   5  -4   84.66    2.45 
   1  -5   4   83.27    2.86 
   1  -5   4   82.58    2.46 
  -2   5  -4   10.60    0.45 
  -2   5  -4   11.31    0.46 
  -2   5  -4   11.56    0.45 
   2  -5   4   11.24    0.44 
   2  -5   4   11.45    0.42 
  -3   5  -4    1.86    0.16 
  -3   5  -4    2.03    0.18 
   3  -5   4    1.63    0.17 
   3  -5   4    2.01    0.17 
  -4   5  -4    4.65    0.26 
  -4   5  -4    4.43    0.28 
   4  -5   4    4.84    0.30 
   4  -5   4    5.17    0.29 
  -5   5  -4    0.17    0.09 
  -5   5  -4    0.15    0.09 
   5  -5   4    0.12    0.09 
   5  -5   4    0.14    0.11 
  -6   5  -4    3.49    0.25 
   6  -5   4    3.49    0.31 
   6  -5   4    3.24    0.26 
  -7   5  -4    1.38    0.18 
   7  -5   4    1.19    0.20 
   7  -5   4    1.00    0.21 
  -8   5  -4    5.95    0.36 
   8  -5   4    5.80    0.39 
   8  -5   4    6.62    0.49 
  -9   5  -4    1.93    0.23 
   9  -5   4    2.32    0.30 
   7   4  -4   24.22    1.08 
   7   4  -4   25.97    1.38 
   6   4  -4    6.15    0.45 
   6   4  -4    9.27    0.71 
   5   4  -4   16.87    0.98 
   5   4  -4   17.15    0.75 
   5   4  -4   17.18    0.59 
   5   4  -4   17.28    0.62 
  -5  -4   4   16.66    0.62 
   4   4  -4    0.38    0.07 
   4   4  -4    0.41    0.23 
   4   4  -4    0.38    0.07 
   4   4  -4    0.40    0.13 
  -4  -4   4    0.24    0.07 
   3   4  -4   14.07    0.50 
   3   4  -4   13.88    0.78 
   3   4  -4   13.72    0.47 
   3   4  -4   13.72    0.48 
   3   4  -4   13.79    0.57 
  -3  -4   4   14.53    0.78 
   2   4  -4    2.44    0.13 
   2   4  -4    2.48    0.19 
   2   4  -4    2.48    0.15 
   2   4  -4    3.05    0.36 
   2   4  -4    2.60    0.14 
  -2  -4   4    1.58    0.27 
   1   4  -4    1.95    0.26 
   1   4  -4    2.09    0.13 
   1   4  -4    2.22    0.13 
   1   4  -4    1.83    0.15 
   1   4  -4    1.95    0.12 
  -1  -4   4    2.06    0.27 
   0   4  -4    2.52    0.14 
   0   4  -4    2.44    0.15 
   0   4  -4    2.22    0.16 
   0   4  -4    2.54    0.28 
   0   4  -4    2.56    0.15 
   0  -4   4    2.24    0.15 
   0  -4   4    2.07    0.26 
  -1   4  -4   13.92    0.49 
  -1   4  -4   14.48    0.52 
  -1   4  -4   13.23    0.52 
   1  -4   4   14.03    0.62 
   1  -4   4   13.62    0.49 
  -2   4  -4   21.31    0.77 
  -2   4  -4   22.84    0.73 
   2  -4   4   21.63    0.84 
   2  -4   4   21.31    0.74 
   2  -4   4   22.26    0.76 
  -3   4  -4   45.69    1.54 
  -3   4  -4   47.02    1.46 
   3  -4   4   46.31    1.60 
   3  -4   4   47.74    1.56 
   3  -4   4   47.79    1.47 
  -4   4  -4  141.83    4.45 
  -4   4  -4  138.73    4.42 
   4  -4   4  141.01    4.56 
   4  -4   4  149.05    4.47 
   4  -4   4  136.24    4.15 
  -5   4  -4    0.36    0.11 
  -5   4  -4    0.32    0.09 
   5  -4   4    0.20    0.09 
   5  -4   4    0.29    0.12 
  -6   4  -4    6.43    0.35 
   6  -4   4    7.63    0.44 
   6  -4   4    7.21    0.39 
  -7   4  -4    2.95    0.23 
   7  -4   4    3.73    0.29 
   7  -4   4    3.02    0.34 
  -8   4  -4   19.22    0.75 
   8  -4   4   18.35    0.78 
   8  -4   4   16.92    0.86 
  -9   4  -4    0.16    0.10 
   9  -4   4    0.20    0.18 
   9  -4   4    0.15    0.13 
  10  -4   4    4.99    0.40 
   8   3  -4    0.38    0.21 
   7   3  -4    2.32    0.47 
   7   3  -4    2.28    0.32 
   6   3  -4    0.67    0.11 
   6   3  -4    0.47    0.26 
   6   3  -4    0.69    0.19 
   5   3  -4   11.27    0.75 
   5   3  -4   11.24    0.44 
   5   3  -4   11.27    0.43 
   5   3  -4   10.38    0.56 
  -5  -3   4   11.29    0.44 
   4   3  -4    3.17    0.43 
   4   3  -4    2.82    0.16 
   4   3  -4    2.63    0.16 
   4   3  -4    2.16    0.25 
  -4  -3   4    2.68    0.17 
   3   3  -4    0.25    0.06 
   3   3  -4    0.28    0.07 
   3   3  -4    0.16    0.09 
   3   3  -4    0.18    0.06 
   3   3  -4    0.12    0.17 
  -3  -3   4    0.21    0.06 
  -3  -3   4    0.22    0.16 
   2   3  -4   45.32    1.72 
   2   3  -4   45.38    1.42 
   2   3  -4   44.14    1.35 
   2   3  -4   41.97    1.48 
   2   3  -4   44.58    1.33 
  -2  -3   4   43.81    1.71 
  -2  -3   4   45.26    1.34 
   1   3  -4    2.19    0.27 
   1   3  -4    2.45    0.17 
   1   3  -4    2.52    0.15 
   1   3  -4    2.24    0.13 
   1   3  -4    2.37    0.14 
  -1  -3   4    2.10    0.27 
   0   3  -4   65.24    2.34 
   0   3  -4   67.65    1.97 
   0   3  -4   68.50    2.10 
   0   3  -4   64.51    2.12 
   0   3  -4   69.24    1.98 
   0  -3   4   64.86    2.34 
   0  -3   4   66.76    1.98 
  -1   3  -4   54.03    1.80 
  -1   3  -4   57.62    1.68 
  -1   3  -4   55.05    1.67 
  -1   3  -4   57.89    1.79 
   1  -3   4   58.93    1.77 
   1  -3   4   54.35    1.68 
   1  -3   4   54.33    1.96 
  -2   3  -4   13.24    0.52 
  -2   3  -4   14.58    0.53 
  -2   3  -4   14.14    0.50 
   2  -3   4   13.69    0.57 
   2  -3   4   13.57    0.51 
   2  -3   4   13.58    0.50 
  -3   3  -4   13.79    0.50 
  -3   3  -4   12.73    0.52 
  -3   3  -4   14.42    0.54 
   3  -3   4   13.53    0.51 
   3  -3   4   12.97    0.53 
   3  -3   4   13.76    0.54 
  -4   3  -4    6.33    0.30 
  -4   3  -4    5.88    0.29 
   4  -3   4    5.37    0.30 
   4  -3   4    5.73    0.32 
  -5   3  -4    4.92    0.27 
   5  -3   4    5.03    0.32 
   5  -3   4    4.82    0.29 
  -6   3  -4    0.81    0.12 
   6  -3   4    0.95    0.16 
   6  -3   4    1.07    0.20 
  -7   3  -4    0.01    0.07 
   7  -3   4    0.12    0.10 
   7  -3   4   -0.10    0.11 
   7  -3   4    0.03    0.08 
  -8   3  -4    5.27    0.31 
   8  -3   4    5.03    0.35 
   8  -3   4    5.05    0.42 
   8  -3   4    4.52    0.31 
  -9   3  -4   15.74    0.67 
   9  -3   4   16.05    0.73 
   9  -3   4   16.87    0.85 
  10  -3   4   12.27    0.76 
  10  -3   4   10.50    0.60 
   8   2  -4   19.24    1.19 
   8   2  -4   16.39    0.90 
   7   2  -4    3.38    0.50 
   7   2  -4    3.37    0.40 
   6   2  -4   13.85    0.53 
   6   2  -4   12.14    0.67 
   6   2  -4   13.77    0.86 
   5   2  -4    9.98    0.41 
   5   2  -4    9.65    0.54 
   5   2  -4   10.30    0.70 
   5   2  -4   10.88    0.42 
  -5  -2   4    9.91    0.42 
   4   2  -4    0.02    0.05 
   4   2  -4    0.09    0.10 
   4   2  -4   -0.02    0.04 
   4   2  -4    0.00    0.16 
  -4  -2   4    0.03    0.15 
  -4  -2   4   -0.05    0.05 
   3   2  -4   27.41    0.90 
   3   2  -4   24.48    0.98 
   3   2  -4   28.15    1.18 
   3   2  -4   26.75    0.85 
  -3  -2   4   26.89    0.86 
  -3  -2   4   27.28    1.17 
   2   2  -4   26.13    0.86 
   2   2  -4   25.76    0.95 
   2   2  -4   25.61    1.11 
   2   2  -4   26.56    0.88 
   2   2  -4   26.51    0.84 
  -2  -2   4   27.73    1.13 
  -2  -2   4   27.14    0.85 
  -2  -2   4   27.20    0.84 
   1   2  -4    2.05    0.12 
   1   2  -4    2.07    0.26 
   1   2  -4    1.32    0.15 
   1   2  -4    1.77    0.12 
   1   2  -4    1.92    0.14 
  -1  -2   4    1.93    0.12 
  -1  -2   4    1.96    0.13 
  -1  -2   4    2.03    0.26 
   0   2  -4    0.88    0.11 
   0   2  -4    0.92    0.10 
   0   2  -4    1.06    0.12 
   0   2  -4    0.92    0.10 
   0  -2   4    1.20    0.13 
   0  -2   4    0.82    0.16 
   0  -2   4    0.95    0.11 
  -1   2  -4   48.78    1.60 
  -1   2  -4   50.36    1.49 
  -1   2  -4   50.68    1.59 
  -1   2  -4   50.58    1.50 
   1  -2   4   49.78    1.58 
   1  -2   4   48.33    1.74 
   1  -2   4   49.77    1.60 
   1  -2   4   48.10    1.50 
  -2   2  -4    4.06    0.21 
  -2   2  -4    3.74    0.21 
  -2   2  -4    4.04    0.21 
   2  -2   4    4.14    0.22 
   2  -2   4    3.90    0.22 
   2  -2   4    3.94    0.21 
   2  -2   4    4.48    0.27 
  -3   2  -4    1.83    0.15 
  -3   2  -4    1.78    0.15 
  -3   2  -4    1.57    0.14 
   3  -2   4    1.75    0.15 
   3  -2   4    1.60    0.15 
   3  -2   4    1.74    0.17 
  -4   2  -4   14.19    0.53 
  -4   2  -4   14.06    0.54 
  -4   2  -4   14.41    0.56 
   4  -2   4   13.27    0.53 
   4  -2   4   14.45    0.57 
  -5   2  -4    3.29    0.21 
  -5   2  -4    3.52    0.24 
  -5   2  -4    3.70    0.23 
   5  -2   4    3.48    0.26 
   5  -2   4    3.32    0.23 
  -6   2  -4   48.78    1.58 
   6  -2   4   46.84    1.54 
   6  -2   4   46.74    1.65 
  -7   2  -4    0.21    0.08 
   7  -2   4    0.05    0.11 
   7  -2   4    0.11    0.10 
   7  -2   4    0.26    0.15 
  -8   2  -4    2.82    0.22 
   8  -2   4    3.11    0.35 
   8  -2   4    2.63    0.28 
   8  -2   4    3.03    0.32 
  -9   2  -4    6.89    0.37 
   9  -2   4    6.76    0.43 
   9  -2   4    7.62    0.53 
   9  -2   4    6.63    0.46 
  10  -2   4    4.13    0.40 
  10  -2   4    4.24    0.49 
   8   1  -4    0.00    0.18 
   8   1  -4    0.01    0.24 
   7   1  -4    9.82    0.45 
   7   1  -4   10.75    0.77 
   7   1  -4    9.46    0.62 
   6   1  -4    1.16    0.15 
   6   1  -4    1.31    0.33 
   6   1  -4    1.10    0.23 
  -6  -1   4    1.38    0.17 
   5   1  -4    0.40    0.10 
   5   1  -4    0.33    0.08 
   5   1  -4    0.34    0.15 
   5   1  -4    0.91    0.27 
  -5  -1   4    0.43    0.10 
  -5  -1   4    0.33    0.07 
   4   1  -4    6.29    0.29 
   4   1  -4    5.85    0.38 
   4   1  -4    6.30    0.28 
   4   1  -4    5.81    0.48 
  -4  -1   4    7.05    0.51 
  -4  -1   4    6.38    0.30 
  -4  -1   4    6.32    0.26 
   3   1  -4   18.71    0.66 
   3   1  -4   18.93    0.89 
   3   1  -4   18.00    0.75 
   3   1  -4   18.76    0.64 
  -3  -1   4   18.84    0.89 
  -3  -1   4   18.99    0.65 
  -3  -1   4   19.61    0.64 
   2   1  -4    0.86    0.19 
   2   1  -4    0.50    0.08 
   2   1  -4    0.54    0.12 
   2   1  -4    0.52    0.07 
  -2  -1   4    0.49    0.16 
  -2  -1   4    0.50    0.07 
  -2  -1   4    0.69    0.10 
   1   1  -4    3.47    0.22 
   1   1  -4    3.21    0.18 
   1   1  -4    3.59    0.17 
   1   1  -4    3.32    0.18 
  -1  -1   4    3.28    0.29 
  -1  -1   4    3.40    0.20 
  -1  -1   4    3.49    0.18 
  -1  -1   4    3.55    0.16 
   0   1  -4  125.06    3.88 
   0   1  -4  126.87    3.84 
   0   1  -4  123.66    3.60 
   0   1  -4  127.01    3.61 
   0  -1   4  122.86    4.15 
   0  -1   4  118.70    3.83 
   0  -1   4  123.05    3.59 
   0  -1   4  128.20    3.88 
  -1   1  -4    9.37    0.37 
  -1   1  -4    9.46    0.39 
  -1   1  -4    9.74    0.36 
  -1   1  -4    8.93    0.35 
   1  -1   4    9.31    0.37 
   1  -1   4    9.89    0.37 
   1  -1   4    9.99    0.39 
  -2   1  -4   12.36    0.48 
  -2   1  -4   12.72    0.46 
  -2   1  -4   13.59    0.48 
   2  -1   4   12.40    0.46 
   2  -1   4   12.66    0.49 
  -3   1  -4   18.82    0.67 
  -3   1  -4   19.29    0.65 
  -3   1  -4   18.30    0.67 
   3  -1   4   18.47    0.68 
   3  -1   4   18.97    0.68 
   3  -1   4   18.35    0.65 
  -4   1  -4    8.96    0.37 
  -4   1  -4    8.67    0.37 
   4  -1   4    8.83    0.38 
   4  -1   4    8.71    0.38 
   4  -1   4    8.12    0.39 
  -5   1  -4   10.01    0.41 
  -5   1  -4    8.70    0.39 
  -5   1  -4   10.53    0.43 
   5  -1   4    9.21    0.42 
   5  -1   4    9.02    0.43 
   5  -1   4    8.89    0.41 
  -6   1  -4   11.64    0.48 
   6  -1   4   12.00    0.51 
   6  -1   4   11.92    0.55 
  -7   1  -4    0.58    0.11 
   7  -1   4    0.33    0.14 
   7  -1   4    0.69    0.16 
  -8   1  -4    0.20    0.08 
   8  -1   4    0.18    0.16 
   8  -1   4    0.20    0.12 
   8  -1   4    0.20    0.14 
  -9   1  -4   -0.02    0.06 
   9  -1   4   -0.19    0.14 
   9  -1   4   -0.09    0.09 
   9  -1   4   -0.25    0.13 
  10  -1   4   11.66    0.71 
  10  -1   4   11.38    0.59 
  10  -1   4   10.73    0.69 
   8   0  -4    0.61    0.25 
   8   0  -4    0.61    0.15 
   8   0  -4    0.60    0.30 
   7   0  -4    9.26    0.46 
   7   0  -4   10.52    0.74 
   7   0  -4   10.24    0.65 
   6   0  -4   38.68    1.66 
   6   0  -4   37.10    1.26 
   6   0  -4   37.04    1.50 
  -6   0   4   39.68    1.29 
  -6   0   4   41.11    1.30 
   5   0  -4   81.71    2.90 
   5   0  -4   83.15    3.13 
   5   0  -4   85.99    2.59 
   5   0  -4   90.38    2.75 
  -5   0   4   88.03    2.61 
  -5   0   4   88.35    3.16 
  -5   0   4   86.17    2.72 
   4   0  -4   95.12    2.79 
   4   0  -4   81.27    2.91 
   4   0  -4   90.59    2.63 
   4   0  -4   84.48    3.14 
  -4   0   4   88.99    3.16 
  -4   0   4   89.17    2.64 
  -4   0   4   87.47    2.76 
   3   0  -4    0.48    0.07 
   3   0  -4    0.40    0.11 
   3   0  -4    0.50    0.09 
   3   0  -4    0.70    0.20 
  -3   0   4    0.56    0.10 
  -3   0   4    0.55    0.08 
  -3   0   4    0.51    0.17 
   2   0  -4   30.73    0.98 
   2   0  -4   28.50    0.93 
   2   0  -4   29.41    1.07 
  -2   0   4   30.06    1.19 
  -2   0   4   29.09    0.94 
   1   0  -4   44.51    1.50 
   1   0  -4   44.12    1.43 
   1   0  -4   44.17    1.36 
  -1   0   4   44.78    1.64 
  -1   0   4   45.77    1.37 
  -1   0   4   45.10    1.50 
  -1   0   4   45.28    1.43 
   0   0  -4    0.17    0.07 
   0   0  -4    0.22    0.07 
   0   0  -4    0.12    0.04 
   0   0  -4    0.15    0.06 
   0   0   4    0.23    0.06 
   0   0   4    0.13    0.07 
   0   0   4    0.15    0.05 
  -1   0  -4   13.67    0.51 
  -1   0  -4   13.93    0.49 
  -1   0  -4   15.85    0.54 
  -1   0  -4   14.57    0.50 
   1   0   4   13.58    0.50 
   1   0   4   13.65    0.51 
   1   0   4   15.09    0.55 
  -2   0  -4    0.32    0.08 
  -2   0  -4    0.26    0.06 
  -2   0  -4    0.22    0.06 
   2   0   4    0.18    0.07 
   2   0   4    0.28    0.06 
   2   0   4    0.32    0.07 
  -3   0  -4  150.93    4.84 
  -3   0  -4  156.15    4.84 
  -3   0  -4  158.39    4.53 
   3   0   4  151.41    4.53 
   3   0   4  152.99    4.85 
   3   0   4  169.15    4.86 
  -4   0  -4  102.81    3.18 
  -4   0  -4   95.17    3.16 
  -4   0  -4  101.47    2.98 
   4   0   4  103.89    3.19 
   4   0   4  102.34    3.19 
   4   0   4  100.27    2.99 
  -5   0  -4   17.69    0.66 
  -5   0  -4   18.24    0.66 
   5   0   4   18.07    0.66 
   5   0   4   18.60    0.69 
   5   0   4   18.74    0.71 
  -6   0  -4   79.34    2.53 
  -6   0  -4   82.52    2.42 
   6   0   4   73.62    2.58 
   6   0   4   81.20    2.57 
   6   0   4   80.44    2.43 
  -7   0  -4   14.33    0.56 
   7   0   4   14.01    0.64 
   7   0   4   13.70    0.59 
   7   0   4   14.55    0.61 
  -8   0  -4    3.94    0.24 
   8   0   4    3.99    0.34 
   8   0   4    3.58    0.29 
   9   0   4    2.69    0.29 
   9   0   4    2.08    0.34 
   9   0   4    1.64    0.27 
  10   0   4    2.53    0.39 
  10   0   4    1.89    0.30 
  10   0   4    2.69    0.31 
  11   0   4    0.20    0.15 
  11   0   4   -0.11    0.17 
   9  -1  -4    0.34    0.26 
   8  -1  -4   11.12    0.53 
   8  -1  -4   10.56    0.73 
   7  -1  -4   17.78    0.71 
   7  -1  -4   17.78    0.91 
   6  -1  -4    4.16    0.25 
   6  -1  -4    3.24    0.25 
   6  -1  -4    3.94    0.44 
  -6   1   4    3.73    0.27 
   5  -1  -4    0.99    0.22 
   5  -1  -4    0.64    0.10 
   5  -1  -4    0.77    0.14 
  -5   1   4    0.70    0.13 
  -5   1   4    0.91    0.25 
  -5   1   4    0.84    0.11 
   4  -1  -4    1.96    0.19 
   4  -1  -4    2.33    0.16 
   4  -1  -4    1.47    0.21 
  -4   1   4    2.18    0.17 
  -4   1   4    2.29    0.15 
  -4   1   4    2.33    0.31 
   3  -1  -4    0.11    0.05 
   3  -1  -4    0.00    0.06 
   3  -1  -4   -0.05    0.08 
  -3   1   4    0.07    0.13 
  -3   1   4    0.10    0.05 
  -3   1   4    0.03    0.06 
   2  -1  -4    1.19    0.13 
   2  -1  -4    1.23    0.10 
   2  -1  -4    0.90    0.14 
  -2   1   4    1.37    0.14 
  -2   1   4    0.78    0.13 
  -2   1   4    1.23    0.10 
  -2   1   4    1.30    0.21 
   1  -1  -4    0.33    0.08 
   1  -1  -4    0.28    0.05 
   1  -1  -4    0.53    0.11 
  -1   1   4    0.27    0.14 
  -1   1   4    0.28    0.10 
  -1   1   4    0.28    0.07 
  -1   1   4    0.30    0.06 
   0  -1  -4   59.78    1.75 
   0  -1  -4   54.61    1.88 
   0  -1  -4   59.56    1.84 
   0  -1  -4   58.07    1.74 
   0   1   4   59.98    1.74 
   0   1   4   59.78    1.90 
   0   1   4   55.77    1.84 
  -1  -1  -4   57.42    1.75 
  -1  -1  -4   53.56    1.65 
  -1  -1  -4   52.60    1.77 
  -1  -1  -4   54.43    1.66 
   1   1   4   56.05    1.75 
   1   1   4   56.09    1.65 
   1   1   4   55.35    1.79 
   1   1   4   56.20    1.66 
  -2  -1  -4   52.62    1.55 
  -2  -1  -4   49.44    1.65 
  -2  -1  -4   52.70    1.64 
  -2  -1  -4   52.22    1.56 
   2   1   4   50.35    1.64 
   2   1   4   52.67    1.67 
   2   1   4   49.99    1.56 
  -3  -1  -4   64.28    2.09 
  -3  -1  -4   65.42    1.97 
  -3  -1  -4   70.93    2.09 
   3   1   4   62.41    1.97 
   3   1   4   66.26    2.11 
   3   1   4   65.81    2.10 
  -4  -1  -4   21.88    0.78 
  -4  -1  -4   23.41    0.77 
  -4  -1  -4   23.27    0.80 
   4   1   4   23.97    0.82 
   4   1   4   22.00    0.77 
   4   1   4   22.99    0.82 
  -5  -1  -4    0.03    0.04 
  -5  -1  -4    0.12    0.07 
   5   1   4    0.12    0.08 
   5   1   4   -0.04    0.06 
   5   1   4    0.05    0.07 
  -6  -1  -4    0.76    0.10 
  -6  -1  -4    0.68    0.12 
   6   1   4    0.35    0.10 
   6   1   4    0.54    0.13 
   6   1   4    0.69    0.13 
  -7  -1  -4   22.71    0.80 
  -7  -1  -4   24.07    0.82 
   7   1   4   20.75    0.82 
   7   1   4   23.29    0.86 
   7   1   4   22.24    0.89 
  -8  -1  -4   10.36    0.44 
   8   1   4   10.67    0.51 
   8   1   4   10.56    0.56 
   8   1   4   11.05    0.52 
   9   1   4    7.13    0.42 
   9   1   4    7.47    0.58 
   9   1   4    7.08    0.48 
  10   1   4    0.68    0.26 
  10   1   4    0.78    0.18 
  10   1   4    0.71    0.22 
  11   1   4    3.72    0.43 
  11   1   4    3.05    0.47 
  11   1   4    3.27    0.36 
   9  -2  -4    0.00    0.25 
   8  -2  -4    1.68    0.35 
   8  -2  -4    2.57    0.28 
   7  -2  -4   -0.04    0.10 
   7  -2  -4   -0.07    0.17 
   6  -2  -4    0.14    0.09 
   6  -2  -4    0.12    0.17 
  -6   2   4    0.21    0.08 
   5  -2  -4    9.99    0.60 
   5  -2  -4   11.06    0.47 
   5  -2  -4   11.15    0.46 
  -5   2   4    9.90    0.64 
  -5   2   4   11.08    0.47 
  -5   2   4   10.57    0.44 
   4  -2  -4   20.72    0.72 
   4  -2  -4   19.88    0.71 
   4  -2  -4   18.62    0.84 
  -4   2   4   19.34    0.91 
  -4   2   4   19.89    0.72 
  -4   2   4   19.41    0.70 
   3  -2  -4   48.27    1.74 
   3  -2  -4   53.73    1.62 
   3  -2  -4   48.79    1.54 
  -3   2   4   47.74    1.61 
  -3   2   4   49.40    1.86 
  -3   2   4   52.07    1.56 
   2  -2  -4   19.52    0.66 
   2  -2  -4   19.23    0.65 
   2  -2  -4   18.77    0.76 
  -2   2   4   18.42    0.82 
  -2   2   4   19.70    0.66 
  -2   2   4   18.37    0.75 
  -2   2   4   18.33    0.66 
   1  -2  -4    9.61    0.36 
   1  -2  -4    9.48    0.37 
  -1   2   4    9.43    0.37 
  -1   2   4    8.92    0.36 
   0  -2  -4   29.22    0.95 
   0  -2  -4   28.13    0.93 
   0  -2  -4   28.64    1.00 
   0   2   4   28.78    0.95 
   0   2   4   28.16    0.92 
  -1  -2  -4   47.54    1.60 
  -1  -2  -4   48.78    1.50 
  -1  -2  -4   49.98    1.57 
  -1  -2  -4   49.52    1.49 
   1   2   4   50.17    1.62 
   1   2   4   50.96    1.49 
   1   2   4   48.77    1.57 
  -2  -2  -4   12.57    0.48 
  -2  -2  -4   13.24    0.48 
  -2  -2  -4   13.56    0.47 
  -2  -2  -4   13.21    0.47 
   2   2   4   13.21    0.48 
   2   2   4   12.83    0.47 
  -3  -2  -4  135.31    4.08 
  -3  -2  -4  132.07    4.08 
  -3  -2  -4  133.86    3.84 
   3   2   4  127.19    3.84 
   3   2   4  128.08    4.09 
   3   2   4  135.28    4.11 
  -4  -2  -4    0.08    0.06 
  -4  -2  -4    0.17    0.05 
   4   2   4    0.24    0.08 
   4   2   4    0.36    0.09 
   4   2   4    0.39    0.09 
  -5  -2  -4   35.00    1.17 
  -5  -2  -4   36.67    1.15 
   5   2   4   35.39    1.22 
   5   2   4   36.12    1.16 
   5   2   4   35.16    1.21 
  -6  -2  -4    8.25    0.34 
  -6  -2  -4    8.56    0.37 
   6   2   4    7.88    0.38 
   6   2   4    8.32    0.40 
   6   2   4    8.47    0.39 
  -7  -2  -4    0.63    0.13 
   7   2   4    0.39    0.11 
   7   2   4    0.71    0.14 
   7   2   4    0.50    0.14 
  -8  -2  -4   10.15    0.41 
  -8  -2  -4   10.47    0.46 
   8   2   4   10.32    0.49 
   8   2   4    9.76    0.53 
   9   2   4   -0.05    0.10 
   9   2   4    0.17    0.21 
   9   2   4    0.22    0.15 
  10   2   4    0.10    0.13 
  10   2   4   -0.22    0.19 
  10   2   4    0.01    0.13 
   8  -3  -4    7.83    0.66 
   8  -3  -4    7.93    0.45 
   7  -3  -4    5.17    0.34 
   7  -3  -4    4.09    0.46 
   6  -3  -4   16.46    0.85 
   6  -3  -4   15.81    0.65 
  -6   3   4   16.44    0.64 
  -6   3   4   16.57    0.88 
   5  -3  -4   12.24    0.66 
   5  -3  -4   12.45    0.51 
  -5   3   4   11.49    0.48 
  -5   3   4   11.00    0.66 
   4  -3  -4   44.23    1.42 
   4  -3  -4   41.36    1.36 
   4  -3  -4   41.95    1.57 
  -4   3   4   43.69    1.38 
  -4   3   4   42.86    1.66 
  -4   3   4   42.17    1.42 
   3  -3  -4   16.95    0.63 
   3  -3  -4   18.31    0.77 
   3  -3  -4   17.86    0.64 
  -3   3   4   17.60    0.64 
  -3   3   4   17.49    0.64 
  -3   3   4   17.33    0.80 
   2  -3  -4   24.06    0.83 
   2  -3  -4   24.19    0.94 
  -2   3   4   25.59    0.83 
  -2   3   4   24.36    0.84 
  -2   3   4   24.60    0.95 
   1  -3  -4   67.24    2.26 
   1  -3  -4   67.22    2.07 
   1  -3  -4   70.98    2.18 
  -1   3   4   72.95    2.08 
  -1   3   4   71.94    2.30 
  -1   3   4   66.38    2.19 
   0  -3  -4    0.42    0.06 
   0  -3  -4    0.58    0.11 
   0  -3  -4    0.60    0.09 
   0   3   4    0.43    0.07 
   0   3   4    0.45    0.08 
   0   3   4    0.52    0.11 
  -1  -3  -4    3.71    0.21 
  -1  -3  -4    3.80    0.20 
  -1  -3  -4    4.11    0.22 
  -1  -3  -4    3.84    0.18 
   1   3   4    3.84    0.23 
   1   3   4    3.93    0.20 
   1   3   4    3.57    0.19 
  -2  -3  -4   18.84    0.63 
  -2  -3  -4   17.68    0.65 
  -2  -3  -4   19.65    0.64 
  -2  -3  -4   19.45    0.65 
   2   3   4   18.64    0.65 
   2   3   4   19.16    0.64 
   2   3   4   19.12    0.68 
  -3  -3  -4    4.42    0.22 
  -3  -3  -4    4.42    0.22 
  -3  -3  -4    4.45    0.20 
   3   3   4    4.35    0.23 
   3   3   4    4.34    0.23 
   3   3   4    4.36    0.22 
  -4  -3  -4    1.03    0.08 
  -4  -3  -4    1.06    0.12 
   4   3   4    0.83    0.10 
   4   3   4    0.83    0.11 
   4   3   4    0.80    0.11 
  -5  -3  -4   29.96    0.98 
  -5  -3  -4   29.90    0.97 
   5   3   4   29.60    1.03 
   5   3   4   28.82    0.98 
   5   3   4   30.35    1.03 
  -6  -3  -4    7.74    0.35 
  -6  -3  -4    7.69    0.31 
   6   3   4    7.86    0.37 
   6   3   4    7.39    0.36 
  -7  -3  -4   29.33    1.00 
  -7  -3  -4   30.32    1.01 
   7   3   4   33.19    1.09 
   7   3   4   28.18    1.09 
   7   3   4   29.80    1.03 
  -8  -3  -4    2.08    0.20 
   8   3   4    1.90    0.22 
   8   3   4    2.06    0.25 
   9   3   4    5.21    0.34 
   9   3   4    3.87    0.49 
   9   3   4    4.02    0.36 
  10   3   4    2.13    0.28 
  10   3   4    2.26    0.33 
  10   3   4    2.56    0.46 
   8  -4  -4    0.82    0.29 
   8  -4  -4    1.18    0.21 
   7  -4  -4   40.31    1.67 
   7  -4  -4   41.50    1.40 
  -7   4   4   39.25    1.40 
   6  -4  -4   34.90    1.19 
   6  -4  -4   33.77    1.42 
  -6   4   4   33.40    1.45 
  -6   4   4   34.87    1.21 
   5  -4  -4    6.97    0.37 
   5  -4  -4    6.82    0.50 
  -5   4   4    7.22    0.35 
  -5   4   4    6.81    0.50 
   4  -4  -4   28.84    1.16 
   4  -4  -4   28.98    0.98 
  -4   4   4   28.65    1.20 
  -4   4   4   28.74    1.00 
   3  -4  -4   62.49    1.97 
   3  -4  -4   65.79    2.21 
  -3   4   4   64.25    2.07 
  -3   4   4   61.94    2.30 
  -3   4   4   67.65    1.99 
   2  -4  -4    3.76    0.28 
   2  -4  -4    4.18    0.23 
  -2   4   4    3.78    0.23 
  -2   4   4    4.00    0.21 
   1  -4  -4    0.35    0.08 
   1  -4  -4    0.66    0.13 
   1  -4  -4    0.43    0.07 
  -1   4   4    0.40    0.13 
  -1   4   4    0.53    0.10 
  -1   4   4    0.50    0.08 
   0  -4  -4    8.51    0.39 
   0  -4  -4    9.09    0.36 
   0  -4  -4    9.12    0.35 
   0   4   4    9.06    0.36 
   0   4   4    9.71    0.44 
   0   4   4    9.58    0.37 
  -1  -4  -4   16.97    0.62 
  -1  -4  -4   18.19    0.60 
  -1  -4  -4   17.33    0.61 
  -1  -4  -4   17.71    0.59 
   1   4   4   17.64    0.60 
   1   4   4   17.77    0.61 
   1   4   4   16.84    0.66 
  -2  -4  -4    1.70    0.10 
  -2  -4  -4    1.81    0.12 
  -2  -4  -4    1.80    0.14 
  -2  -4  -4    1.66    0.14 
   2   4   4    1.91    0.15 
   2   4   4    1.67    0.13 
   2   4   4    1.51    0.12 
  -3  -4  -4    4.99    0.24 
  -3  -4  -4    4.98    0.21 
  -3  -4  -4    4.81    0.23 
   3   4   4    4.77    0.25 
   3   4   4    4.61    0.24 
   3   4   4    4.90    0.23 
  -4  -4  -4  187.22    5.72 
  -4  -4  -4  189.32    5.40 
  -4  -4  -4  187.15    5.39 
   4   4   4  190.98    5.79 
   4   4   4  182.54    5.77 
   4   4   4  185.42    5.40 
  -5  -4  -4  135.22    4.13 
  -5  -4  -4  138.09    3.92 
   5   4   4  136.57    4.20 
   5   4   4  130.02    3.93 
   5   4   4  132.05    4.20 
  -6  -4  -4    9.18    0.34 
  -6  -4  -4    9.26    0.39 
   6   4   4    9.87    0.42 
   6   4   4    9.03    0.41 
   6   4   4    9.32    0.43 
  -7  -4  -4    9.97    0.42 
  -7  -4  -4   10.10    0.36 
   7   4   4    9.67    0.44 
   7   4   4    9.99    0.45 
   8   4   4    0.02    0.09 
   8   4   4    0.00    0.10 
   9   4   4   -0.03    0.10 
   9   4   4   -0.24    0.10 
   9   4   4   -0.42    0.18 
  10   4   4    0.54    0.29 
  10   4   4    0.10    0.15 
   8  -5  -4    1.31    0.33 
   8  -5  -4    0.88    0.19 
   7  -5  -4    3.77    0.30 
   7  -5  -4    3.09    0.41 
  -7   5   4    3.14    0.25 
   6  -5  -4    5.57    0.35 
   6  -5  -4    5.55    0.54 
  -6   5   4    5.42    0.32 
  -6   5   4    5.38    0.47 
   5  -5  -4   18.64    0.89 
   5  -5  -4   18.17    0.71 
  -5   5   4   18.08    0.88 
  -5   5   4   18.13    0.70 
   4  -5  -4    2.09    0.27 
   4  -5  -4    2.39    0.23 
  -4   5   4    2.34    0.31 
  -4   5   4    2.12    0.17 
   3  -5  -4   -0.01    0.07 
   3  -5  -4   -0.01    0.10 
  -3   5   4   -0.06    0.09 
  -3   5   4   -0.01    0.10 
  -3   5   4    0.00    0.05 
   2  -5  -4    5.38    0.28 
   2  -5  -4    4.98    0.33 
  -2   5   4    5.91    0.29 
  -2   5   4    5.57    0.27 
  -2   5   4    5.57    0.37 
   1  -5  -4    1.77    0.15 
   1  -5  -4    1.69    0.18 
  -1   5   4    1.63    0.22 
  -1   5   4    1.94    0.15 
  -1   5   4    1.69    0.13 
   0  -5  -4   61.98    1.98 
   0  -5  -4   59.20    1.84 
   0   5   4   61.57    1.95 
   0   5   4   61.39    1.85 
   0   5   4   62.87    2.05 
  -1  -5  -4   11.66    0.43 
  -1  -5  -4   11.76    0.45 
  -1  -5  -4   11.88    0.44 
   1   5   4   11.77    0.44 
   1   5   4   11.53    0.43 
   1   5   4   12.12    0.50 
  -2  -5  -4   43.39    1.35 
  -2  -5  -4   45.56    1.40 
  -2  -5  -4   43.07    1.34 
   2   5   4   44.57    1.46 
   2   5   4   41.93    1.40 
   2   5   4   44.61    1.34 
  -3  -5  -4   27.44    0.88 
  -3  -5  -4   28.11    0.88 
  -3  -5  -4   27.92    0.89 
   3   5   4   27.42    0.92 
   3   5   4   28.21    0.95 
   3   5   4   26.67    0.89 
  -4  -5  -4    9.03    0.31 
  -4  -5  -4    9.46    0.37 
  -4  -5  -4    9.04    0.36 
   4   5   4    9.04    0.37 
   4   5   4    8.36    0.36 
   4   5   4    9.67    0.39 
  -5  -5  -4    1.99    0.15 
  -5  -5  -4    1.68    0.15 
   5   5   4    1.79    0.17 
   5   5   4    1.93    0.16 
   5   5   4    1.90    0.15 
  -6  -5  -4    3.67    0.21 
   6   5   4    3.62    0.24 
   6   5   4    3.54    0.23 
   6   5   4    3.64    0.23 
  -7  -5  -4    0.19    0.07 
   7   5   4    0.07    0.08 
   7   5   4    0.02    0.07 
   8   5   4    4.16    0.28 
   8   5   4    4.48    0.32 
   9   5   4    7.39    0.46 
   9   5   4    7.50    0.69 
  10   5   4    0.76    0.21 
   8  -6  -4    0.81    0.29 
   8  -6  -4    0.38    0.16 
   7  -6  -4    6.91    0.59 
   7  -6  -4    6.18    0.41 
  -7   6   4    6.84    0.38 
   6  -6  -4    0.18    0.20 
   6  -6  -4    0.31    0.13 
  -6   6   4    0.63    0.14 
  -6   6   4    0.46    0.20 
   5  -6  -4    9.92    0.61 
   5  -6  -4    8.73    0.45 
  -5   6   4    9.74    0.45 
  -5   6   4    9.37    0.57 
   4  -6  -4    2.70    0.25 
   4  -6  -4    2.37    0.30 
  -4   6   4    2.65    0.20 
  -4   6   4    2.81    0.33 
   3  -6  -4    1.18    0.20 
   3  -6  -4    1.43    0.17 
  -3   6   4    1.18    0.13 
  -3   6   4    1.27    0.21 
   2  -6  -4    7.41    0.36 
   2  -6  -4    8.50    0.43 
  -2   6   4    8.15    0.36 
  -2   6   4    8.67    0.48 
   1  -6  -4   70.17    2.10 
   1  -6  -4   71.40    2.28 
  -1   6   4   68.75    2.22 
  -1   6   4   68.82    2.35 
   0  -6  -4    1.31    0.13 
   0  -6  -4    1.33    0.14 
   0   6   4    1.75    0.21 
   0   6   4    1.11    0.13 
   0   6   4    1.45    0.12 
  -1  -6  -4    4.95    0.24 
  -1  -6  -4    5.36    0.23 
  -1  -6  -4    5.12    0.26 
   1   6   4    5.17    0.30 
   1   6   4    5.14    0.25 
   1   6   4    4.93    0.23 
  -2  -6  -4    0.02    0.05 
  -2  -6  -4    0.03    0.03 
  -2  -6  -4   -0.01    0.05 
   2   6   4    0.06    0.05 
   2   6   4    0.03    0.04 
   2   6   4    0.12    0.07 
  -3  -6  -4    9.13    0.36 
  -3  -6  -4    9.20    0.35 
   3   6   4    9.13    0.39 
   3   6   4    8.37    0.35 
  -4  -6  -4    3.70    0.20 
  -4  -6  -4    3.52    0.19 
   4   6   4    3.87    0.22 
   4   6   4    3.33    0.20 
   4   6   4    3.60    0.20 
  -5  -6  -4    1.38    0.14 
  -5  -6  -4    1.40    0.14 
   5   6   4    1.49    0.15 
   5   6   4    1.30    0.14 
   5   6   4    1.47    0.15 
  -6  -6  -4   43.72    1.37 
  -6  -6  -4   45.59    1.38 
   6   6   4   44.48    1.40 
   6   6   4   44.76    1.49 
   6   6   4   43.42    1.48 
  -7  -6  -4    9.39    0.38 
   7   6   4    7.74    0.41 
   7   6   4    8.74    0.40 
   8   6   4   12.03    0.56 
   9   6   4    3.68    0.33 
   9   6   4    3.77    0.57 
   7  -7  -4    0.87    0.20 
  -7   7   4    0.76    0.16 
   6  -7  -4    2.57    0.28 
   6  -7  -4    2.73    0.39 
  -6   7   4    2.71    0.27 
   5  -7  -4    3.10    0.36 
   5  -7  -4    3.68    0.29 
  -5   7   4    4.05    0.37 
  -5   7   4    4.26    0.28 
   4  -7  -4    4.22    0.42 
   4  -7  -4    4.34    0.28 
  -4   7   4    4.24    0.36 
  -4   7   4    4.28    0.27 
   3  -7  -4   36.31    1.33 
   3  -7  -4   34.56    1.17 
  -3   7   4   34.86    1.38 
  -3   7   4   35.59    1.22 
   2  -7  -4    0.33    0.11 
   2  -7  -4    0.49    0.10 
  -2   7   4    0.41    0.09 
  -2   7   4    0.53    0.15 
   1  -7  -4   18.84    0.71 
   1  -7  -4   18.07    0.66 
  -1   7   4   19.73    0.82 
  -1   7   4   18.27    0.67 
   0  -7  -4    3.72    0.20 
   0  -7  -4    3.11    0.20 
   0   7   4    3.12    0.19 
   0   7   4    3.69    0.28 
  -1  -7  -4    0.76    0.08 
  -1  -7  -4    0.63    0.11 
  -1  -7  -4    0.88    0.11 
   1   7   4    0.66    0.09 
   1   7   4    0.66    0.13 
  -2  -7  -4   19.22    0.64 
  -2  -7  -4   18.85    0.66 
   2   7   4   20.01    0.73 
   2   7   4   18.96    0.66 
   2   7   4   18.70    0.65 
  -3  -7  -4   16.93    0.58 
  -3  -7  -4   17.88    0.60 
   3   7   4   17.70    0.65 
   3   7   4   16.47    0.60 
  -4  -7  -4   29.40    0.94 
  -4  -7  -4   28.91    0.93 
   4   7   4   28.31    0.99 
   4   7   4   31.99    1.03 
  -5  -7  -4   13.24    0.47 
  -5  -7  -4   12.48    0.46 
   5   7   4   12.91    0.50 
   5   7   4   12.74    0.52 
  -6  -7  -4    7.39    0.30 
  -6  -7  -4    6.97    0.31 
   6   7   4    7.07    0.34 
   6   7   4    6.47    0.32 
   6   7   4    7.00    0.34 
  -7  -7  -4    0.62    0.11 
   7   7   4    0.63    0.13 
  -8  -7  -4    0.03    0.07 
  -9  -7  -4    0.08    0.09 
   9   7   4    0.11    0.13 
   7  -8  -4    0.02    0.13 
  -7   8   4    0.06    0.10 
   6  -8  -4    5.99    0.39 
  -6   8   4    6.39    0.38 
   5  -8  -4    1.95    0.23 
  -5   8   4    2.25    0.24 
   4  -8  -4   30.32    1.23 
   4  -8  -4   31.12    1.09 
  -4   8   4   32.20    1.12 
  -4   8   4   30.97    1.27 
   3  -8  -4    2.21    0.26 
   3  -8  -4    2.46    0.24 
  -3   8   4    1.98    0.28 
  -3   8   4    2.37    0.19 
   2  -8  -4   18.41    0.68 
   2  -8  -4   18.59    0.75 
  -2   8   4   18.94    0.86 
  -2   8   4   18.31    0.70 
   1  -8  -4    1.01    0.14 
   1  -8  -4    1.03    0.13 
  -1   8   4    1.07    0.13 
  -1   8   4    0.98    0.20 
   0  -8  -4    0.67    0.09 
   0  -8  -4    0.50    0.10 
   0   8   4    0.48    0.09 
   0   8   4    0.60    0.14 
  -1  -8  -4   30.77    0.98 
  -1  -8  -4   29.54    1.01 
   1   8   4   30.41    1.03 
   1   8   4   32.07    1.14 
  -2  -8  -4    2.82    0.17 
  -2  -8  -4    2.79    0.19 
   2   8   4    2.85    0.23 
   2   8   4    2.75    0.17 
  -3  -8  -4    8.15    0.32 
  -3  -8  -4    7.95    0.33 
   3   8   4    8.33    0.38 
   3   8   4    7.56    0.33 
  -4  -8  -4   18.56    0.60 
  -4  -8  -4   16.66    0.58 
   4   8   4   16.76    0.62 
   4   8   4   18.21    0.67 
  -5  -8  -4    4.77    0.22 
   5   8   4    4.42    0.25 
   5   8   4    5.06    0.27 
  -6  -8  -4    0.22    0.07 
   6   8   4    0.30    0.09 
  -7  -8  -4   28.06    0.87 
   7   8   4   25.23    0.96 
  -8  -8  -4    2.25    0.17 
   6  -9  -4    4.42    0.34 
  -6   9   4    4.71    0.33 
   5  -9  -4    0.08    0.12 
  -5   9   4    0.07    0.09 
   4  -9  -4    1.68    0.21 
  -4   9   4    1.81    0.21 
   3  -9  -4    0.24    0.11 
  -3   9   4    0.42    0.11 
   2  -9  -4    5.51    0.31 
  -2   9   4    5.39    0.30 
   1  -9  -4    3.60    0.23 
   1  -9  -4    3.67    0.21 
  -1   9   4    3.45    0.22 
  -1   9   4    3.38    0.36 
   0  -9  -4    0.01    0.06 
   0   9   4    0.06    0.06 
   0   9   4    0.10    0.11 
  -1  -9  -4    0.72    0.11 
  -1  -9  -4    0.66    0.12 
   1   9   4    0.75    0.10 
   1   9   4    0.73    0.16 
  -2  -9  -4    0.66    0.09 
  -2  -9  -4    0.64    0.10 
   2   9   4    0.80    0.10 
   2   9   4    0.59    0.14 
  -3  -9  -4    0.79    0.09 
  -3  -9  -4    0.95    0.11 
   3   9   4    0.87    0.11 
   3   9   4    0.71    0.14 
  -4  -9  -4    8.72    0.33 
  -4  -9  -4    8.93    0.33 
   4   9   4    8.85    0.41 
   4   9   4    8.85    0.37 
  -5  -9  -4   11.10    0.39 
   5   9   4   11.59    0.46 
   5   9   4   11.43    0.49 
  -6  -9  -4    3.47    0.16 
   6   9   4    3.11    0.22 
  -7  -9  -4    0.03    0.05 
   7   9   4    0.10    0.09 
   5 -10  -4    0.67    0.17 
  -5  10   4    0.71    0.15 
   4 -10  -4    4.55    0.33 
  -4  10   4    4.43    0.30 
   3 -10  -4    0.52    0.14 
  -3  10   4    0.60    0.13 
   2 -10  -4    9.13    0.41 
  -2  10   4    8.02    0.40 
   1 -10  -4    3.71    0.25 
  -1  10   4    4.03    0.25 
   0 -10  -4   33.40    1.07 
   0  10   4   31.75    1.11 
  -1 -10  -4    0.00    0.06 
   1  10   4    0.10    0.06 
  -2 -10  -4    6.75    0.29 
   2  10   4    6.48    0.30 
   2  10   4    6.97    0.42 
  -3 -10  -4    0.02    0.04 
   3  10   4    0.03    0.06 
   3  10   4   -0.02    0.09 
  -4 -10  -4    1.27    0.09 
   4  10   4    1.17    0.13 
   5  10   4    0.10    0.07 
   6  10   4   14.18    0.56 
   7  10   4    1.60    0.18 
   4 -11  -4    2.74    0.28 
  -4  11   4    2.30    0.26 
   3 -11  -4   16.87    0.68 
  -3  11   4   15.55    0.67 
   2 -11  -4   18.20    0.70 
  -2  11   4   17.88    0.72 
   1 -11  -4   11.41    0.48 
  -1  11   4   10.59    0.48 
   0 -11  -4   43.56    1.40 
   0  11   4   44.78    1.48 
  -1 -11  -4    0.05    0.06 
   1  11   4    0.16    0.07 
  -2 -11  -4    0.64    0.09 
   2  11   4    0.56    0.11 
  -3 -11  -4    0.50    0.07 
   3  11   4    0.71    0.11 
   4  11   4    1.63    0.16 
   5  11   4    0.90    0.12 
   3 -12  -4    1.39    0.20 
  -3  12   4    1.19    0.18 
   2 -12  -4   19.49    0.75 
  -2  12   4   19.32    0.77 
   1 -12  -4    1.25    0.17 
  -1  12   4    1.48    0.17 
   0 -12  -4    0.22    0.09 
   0  12   4    0.11    0.08 
  -1 -12  -4    9.71    0.38 
   1  12   4    8.60    0.40 
  -2 -12  -4    4.47    0.21 
   2  12   4    4.33    0.25 
   3  12   4    0.02    0.07 
   4  12   4    1.29    0.15 
   0  10  -5    0.52    0.11 
  -1  10  -5    0.37    0.10 
  -2  10  -5    5.52    0.31 
   2 -10   5    5.33    0.29 
  -3  10  -5    0.46    0.12 
   3 -10   5    0.41    0.12 
  -4  10  -5    0.95    0.16 
   4 -10   5    1.15    0.18 
   2   9  -5    3.36    0.48 
   2   9  -5    3.22    0.21 
   1   9  -5   27.76    0.98 
   1   9  -5   28.74    1.33 
   0   9  -5    1.40    0.16 
   0   9  -5    1.32    0.29 
  -1   9  -5    0.92    0.14 
   1  -9   5    0.92    0.12 
  -2   9  -5    0.94    0.15 
   2  -9   5    0.66    0.13 
  -3   9  -5    0.06    0.08 
   3  -9   5   -0.07    0.07 
  -4   9  -5    0.02    0.08 
   4  -9   5    0.22    0.11 
  -5   9  -5    0.33    0.11 
   5  -9   5    0.70    0.17 
  -6   9  -5   10.04    0.50 
   6  -9   5    9.20    0.52 
   4   8  -5    0.66    0.14 
   3   8  -5   16.16    0.97 
   3   8  -5   15.00    0.61 
   2   8  -5    0.69    0.27 
   2   8  -5    0.59    0.11 
   1   8  -5    0.18    0.08 
   1   8  -5   -0.18    0.16 
   0   8  -5    1.28    0.15 
   0   8  -5    1.34    0.27 
  -1   8  -5    0.18    0.08 
   1  -8   5    0.27    0.08 
  -2   8  -5    0.00    0.07 
   2  -8   5   -0.07    0.07 
  -3   8  -5    3.50    0.25 
   3  -8   5    3.68    0.25 
  -4   8  -5   16.52    0.67 
   4  -8   5   16.51    0.67 
  -5   8  -5    7.53    0.40 
   5  -8   5    7.74    0.43 
  -6   8  -5   32.29    1.19 
   6  -8   5   32.18    1.18 
  -7   8  -5    6.62    0.40 
   7  -8   5    6.60    0.44 
   5   7  -5    3.66    0.30 
   4   7  -5    2.91    0.48 
   4   7  -5    2.32    0.24 
   3   7  -5    0.93    0.15 
   3   7  -5    0.80    0.29 
   2   7  -5    9.59    0.39 
   2   7  -5    9.27    0.66 
   2   7  -5   10.09    0.43 
   1   7  -5    3.28    0.19 
   1   7  -5    2.91    0.39 
   1   7  -5    2.80    0.20 
   0   7  -5    4.07    0.25 
   0   7  -5    4.59    0.25 
   0   7  -5    5.03    0.43 
   0   7  -5    4.61    0.22 
  -1   7  -5    0.45    0.10 
  -1   7  -5    0.46    0.09 
  -1   7  -5    0.47    0.10 
   1  -7   5    0.38    0.09 
  -2   7  -5    4.97    0.28 
   2  -7   5    5.27    0.29 
  -3   7  -5    5.25    0.30 
   3  -7   5    5.64    0.31 
  -4   7  -5    2.01    0.20 
   4  -7   5    2.49    0.24 
  -5   7  -5    1.66    0.20 
   5  -7   5    1.53    0.21 
  -6   7  -5   13.54    0.62 
   6  -7   5   15.26    0.66 
  -7   7  -5    6.27    0.38 
   7  -7   5    6.21    0.42 
  -8   7  -5    0.19    0.12 
   8  -7   5    0.11    0.14 
   6   6  -5   -0.05    0.13 
   5   6  -5    0.47    0.16 
   5   6  -5    0.41    0.28 
   4   6  -5    0.17    0.12 
   4   6  -5    0.26    0.23 
   3   6  -5    6.50    0.57 
   3   6  -5    5.71    0.34 
   3   6  -5    6.81    0.29 
   2   6  -5    7.02    0.36 
   2   6  -5    7.49    0.58 
   2   6  -5    7.92    0.33 
   2   6  -5    7.76    0.30 
   1   6  -5   14.12    0.79 
   1   6  -5   14.91    0.58 
   1   6  -5   15.73    0.55 
   1   6  -5   14.07    0.49 
   0   6  -5    0.25    0.07 
   0   6  -5    0.04    0.14 
   0   6  -5    0.21    0.08 
   0   6  -5    0.16    0.07 
  -1   6  -5    1.41    0.16 
  -1   6  -5    1.35    0.14 
  -1   6  -5    1.34    0.15 
   1  -6   5    0.98    0.13 
  -2   6  -5    1.57    0.18 
  -2   6  -5    1.35    0.16 
   2  -6   5    1.08    0.15 
  -3   6  -5    0.67    0.12 
   3  -6   5    0.79    0.11 
   3  -6   5    0.85    0.14 
  -4   6  -5    3.33    0.24 
   4  -6   5    4.01    0.27 
   4  -6   5    3.89    0.27 
  -5   6  -5    1.50    0.18 
   5  -6   5    1.23    0.19 
  -6   6  -5    0.62    0.13 
   6  -6   5    0.37    0.14 
  -7   6  -5   13.89    0.62 
   7  -6   5   14.57    0.67 
  -8   6  -5   16.76    0.73 
   8  -6   5   16.73    0.76 
  -9   6  -5    2.21    0.25 
   9  -6   5    2.47    0.32 
   6   5  -5    1.63    0.27 
   5   5  -5    1.21    0.21 
   5   5  -5    0.65    0.30 
   4   5  -5    0.41    0.24 
   4   5  -5    0.03    0.11 
   4   5  -5    0.03    0.06 
   3   5  -5    9.41    0.35 
   3   5  -5    8.89    0.45 
   3   5  -5    9.86    0.38 
   3   5  -5   10.34    0.69 
   2   5  -5   18.85    0.62 
   2   5  -5   18.71    0.73 
   2   5  -5   19.41    0.97 
   2   5  -5   19.22    0.67 
  -2  -5   5   19.60    1.04 
   1   5  -5   52.05    1.66 
   1   5  -5   54.86    1.57 
   1   5  -5   51.08    1.69 
   1   5  -5   50.60    1.97 
   1   5  -5   50.59    1.54 
  -1  -5   5   47.78    1.96 
   0   5  -5   57.50    2.14 
   0   5  -5   57.33    1.88 
   0   5  -5   59.80    1.87 
   0   5  -5   57.69    1.74 
   0  -5   5   57.07    2.14 
  -1   5  -5    1.16    0.13 
  -1   5  -5    1.06    0.12 
  -1   5  -5    1.35    0.15 
   1  -5   5    0.91    0.19 
   1  -5   5    1.10    0.13 
  -2   5  -5   52.42    1.71 
  -2   5  -5   49.59    1.69 
   2  -5   5   52.51    1.64 
   2  -5   5   49.65    1.60 
   2  -5   5   53.04    1.85 
  -3   5  -5    0.84    0.13 
  -3   5  -5    0.98    0.15 
   3  -5   5    0.74    0.13 
   3  -5   5    0.80    0.14 
   3  -5   5    0.78    0.12 
  -4   5  -5    2.27    0.19 
   4  -5   5    2.41    0.22 
   4  -5   5    2.17    0.16 
   4  -5   5    2.28    0.22 
  -5   5  -5    0.60    0.12 
   5  -5   5    0.60    0.14 
   5  -5   5    0.38    0.13 
  -6   5  -5    0.22    0.10 
   6  -5   5    0.21    0.12 
   6  -5   5    0.25    0.14 
  -7   5  -5    5.47    0.33 
   7  -5   5    5.58    0.37 
   7  -5   5    5.41    0.42 
  -8   5  -5   17.23    0.72 
   8  -5   5   16.59    0.76 
  -9   5  -5    7.38    0.43 
   9  -5   5    7.82    0.49 
   7   4  -5   12.81    0.73 
   6   4  -5    0.35    0.17 
   6   4  -5    0.42    0.30 
   5   4  -5   13.35    0.66 
   5   4  -5   13.22    0.88 
   4   4  -5   35.47    1.31 
   4   4  -5   36.21    1.59 
   4   4  -5   36.24    1.18 
   4   4  -5   34.20    1.11 
  -4  -4   5   35.72    1.12 
   3   4  -5   13.91    0.49 
   3   4  -5   14.32    0.82 
   3   4  -5   14.69    0.52 
   3   4  -5   13.16    0.60 
  -3  -4   5   13.55    0.49 
   2   4  -5    8.02    0.55 
   2   4  -5    7.58    0.31 
   2   4  -5    7.11    0.29 
   2   4  -5    7.15    0.37 
  -2  -4   5    6.43    0.51 
   1   4  -5    0.00    0.04 
   1   4  -5    0.12    0.06 
   1   4  -5    0.09    0.06 
   1   4  -5    0.13    0.08 
   1   4  -5    0.24    0.15 
  -1  -4   5    0.23    0.15 
   0   4  -5   10.66    0.41 
   0   4  -5   11.46    0.43 
   0   4  -5   10.18    0.45 
   0   4  -5   11.37    0.42 
   0  -4   5   10.49    0.59 
  -1   4  -5    0.35    0.08 
  -1   4  -5    0.26    0.07 
  -1   4  -5    0.32    0.08 
  -1   4  -5    0.27    0.09 
   1  -4   5    0.24    0.05 
   1  -4   5    0.15    0.07 
   1  -4   5    0.43    0.15 
  -2   4  -5    0.46    0.09 
  -2   4  -5    0.57    0.10 
   2  -4   5    0.24    0.11 
   2  -4   5    0.38    0.08 
   2  -4   5    0.36    0.09 
  -3   4  -5    0.40    0.09 
  -3   4  -5    0.46    0.09 
   3  -4   5    0.95    0.14 
   3  -4   5    0.77    0.12 
   3  -4   5    0.79    0.12 
  -4   4  -5    0.48    0.10 
  -4   4  -5    0.30    0.09 
   4  -4   5    0.41    0.11 
   4  -4   5    0.55    0.10 
   4  -4   5    0.58    0.12 
  -5   4  -5    5.32    0.33 
  -5   4  -5    5.17    0.29 
   5  -4   5    4.58    0.32 
   5  -4   5    4.88    0.31 
   5  -4   5    5.13    0.25 
  -6   4  -5   30.73    1.10 
   6  -4   5   30.43    1.09 
   6  -4   5   30.99    1.18 
  -7   4  -5   24.31    0.92 
   7  -4   5   24.70    0.94 
   7  -4   5   24.32    1.02 
  -8   4  -5    6.73    0.39 
   8  -4   5    7.49    0.45 
   8  -4   5    7.85    0.52 
  -9   4  -5    0.05    0.08 
   9  -4   5   -0.05    0.17 
   9  -4   5    0.23    0.13 
  10  -4   5    0.16    0.15 
   7   3  -5    0.33    0.19 
   6   3  -5    5.69    0.65 
   6   3  -5    4.84    0.42 
   5   3  -5    5.04    0.39 
   5   3  -5    4.86    0.58 
   5   3  -5    5.25    0.27 
   4   3  -5    2.01    0.16 
   4   3  -5    1.95    0.25 
   4   3  -5    2.15    0.40 
   4   3  -5    1.92    0.15 
  -4  -3   5    1.89    0.17 
   3   3  -5    2.27    0.35 
   3   3  -5    2.08    0.15 
   3   3  -5    1.64    0.14 
   3   3  -5    1.83    0.23 
  -3  -3   5    1.92    0.15 
  -3  -3   5    1.46    0.30 
   2   3  -5   27.60    1.02 
   2   3  -5   28.87    1.23 
   2   3  -5   28.67    0.95 
   2   3  -5   29.23    0.92 
   2   3  -5   28.68    0.90 
  -2  -3   5   26.71    0.89 
  -2  -3   5   27.13    1.22 
   1   3  -5    1.79    0.14 
   1   3  -5    1.62    0.13 
   1   3  -5    1.34    0.24 
   1   3  -5    1.99    0.18 
   1   3  -5    1.67    0.13 
  -1  -3   5    1.72    0.28 
   0   3  -5    0.79    0.11 
   0   3  -5    0.80    0.10 
   0   3  -5    0.78    0.12 
   0   3  -5    0.87    0.11 
   0  -3   5    0.80    0.18 
   0  -3   5    0.89    0.08 
  -1   3  -5    1.08    0.12 
  -1   3  -5    1.14    0.13 
  -1   3  -5    1.22    0.13 
  -1   3  -5    1.12    0.14 
   1  -3   5    1.04    0.18 
   1  -3   5    1.25    0.12 
   1  -3   5    1.27    0.14 
  -2   3  -5   16.71    0.63 
  -2   3  -5   16.58    0.59 
  -2   3  -5   16.76    0.62 
   2  -3   5   16.42    0.60 
   2  -3   5   16.61    0.61 
   2  -3   5   15.92    0.70 
  -3   3  -5    2.71    0.19 
  -3   3  -5    3.13    0.21 
   3  -3   5    2.83    0.20 
   3  -3   5    3.00    0.22 
   3  -3   5    2.10    0.17 
  -4   3  -5   35.84    1.26 
   4  -3   5   37.91    1.28 
   4  -3   5   36.64    1.21 
  -5   3  -5    1.26    0.15 
  -5   3  -5    1.42    0.18 
   5  -3   5    1.28    0.18 
   5  -3   5    1.66    0.20 
  -6   3  -5    4.84    0.29 
   6  -3   5    4.62    0.34 
   6  -3   5    4.72    0.31 
  -7   3  -5    8.44    0.42 
   7  -3   5    8.85    0.51 
   7  -3   5    9.00    0.47 
  -8   3  -5    0.96    0.16 
   8  -3   5    0.87    0.16 
   8  -3   5    0.88    0.22 
   8  -3   5    1.03    0.19 
  -9   3  -5   -0.02    0.07 
   9  -3   5    0.08    0.16 
   9  -3   5    0.16    0.14 
  10  -3   5    1.16    0.30 
  10  -3   5    0.58    0.19 
   7   2  -5    0.04    0.16 
   7   2  -5   -0.22    0.25 
   6   2  -5    1.01    0.15 
   6   2  -5    0.78    0.32 
   6   2  -5    1.12    0.25 
   5   2  -5    2.27    0.30 
   5   2  -5    2.96    0.43 
   5   2  -5    3.03    0.21 
  -5  -2   5    2.86    0.21 
   4   2  -5   15.49    0.57 
   4   2  -5   15.04    0.55 
   4   2  -5   16.21    0.88 
   4   2  -5   14.27    0.69 
  -4  -2   5   14.98    0.57 
   3   2  -5    0.57    0.14 
   3   2  -5    0.66    0.21 
   3   2  -5    0.55    0.08 
   3   2  -5    0.66    0.10 
  -3  -2   5    0.65    0.22 
  -3  -2   5    0.59    0.10 
  -3  -2   5    0.76    0.07 
   2   2  -5   18.10    0.64 
   2   2  -5   17.70    0.62 
   2   2  -5   18.14    0.88 
   2   2  -5   17.20    0.72 
   2   2  -5   19.19    0.65 
  -2  -2   5   18.39    0.61 
  -2  -2   5   18.09    0.89 
  -2  -2   5   19.25    0.64 
   1   2  -5   11.36    0.49 
   1   2  -5   11.96    0.44 
   1   2  -5   11.98    0.44 
   1   2  -5   11.28    0.43 
  -1  -2   5   11.75    0.41 
  -1  -2   5   11.63    0.43 
  -1  -2   5   10.91    0.61 
   0   2  -5    9.27    0.37 
   0   2  -5    8.83    0.39 
   0   2  -5    8.55    0.35 
   0   2  -5    8.72    0.36 
   0  -2   5    8.69    0.49 
  -1   2  -5    0.86    0.11 
  -1   2  -5    0.77    0.10 
  -1   2  -5    0.73    0.10 
  -1   2  -5    0.89    0.13 
   1  -2   5    1.00    0.18 
   1  -2   5    0.72    0.09 
   1  -2   5    0.72    0.11 
  -2   2  -5   58.91    1.86 
  -2   2  -5   56.66    1.86 
  -2   2  -5   57.57    1.75 
   2  -2   5   64.38    2.03 
   2  -2   5   52.07    1.83 
   2  -2   5   55.09    1.75 
  -3   2  -5    3.33    0.21 
  -3   2  -5    3.47    0.21 
  -3   2  -5    3.23    0.20 
   3  -2   5    3.15    0.22 
   3  -2   5    3.56    0.21 
  -4   2  -5   11.38    0.47 
  -4   2  -5   10.70    0.46 
  -4   2  -5   10.59    0.45 
   4  -2   5    9.70    0.45 
   4  -2   5   11.76    0.48 
  -5   2  -5    0.63    0.10 
   5  -2   5    0.73    0.13 
   5  -2   5    0.77    0.15 
  -6   2  -5    8.08    0.38 
   6  -2   5    7.42    0.40 
   6  -2   5    7.89    0.43 
  -7   2  -5    2.28    0.20 
   7  -2   5    2.23    0.28 
   7  -2   5    2.21    0.26 
  -8   2  -5    7.92    0.39 
   8  -2   5    6.44    0.47 
   8  -2   5    7.44    0.43 
   8  -2   5    7.37    0.44 
  -9   2  -5    7.93    0.41 
   9  -2   5    7.37    0.53 
   9  -2   5    7.36    0.46 
   9  -2   5    7.54    0.48 
  10  -2   5    8.47    0.61 
  10  -2   5    9.24    0.54 
   8   1  -5    1.65    0.33 
   7   1  -5    2.25    0.36 
   7   1  -5    1.64    0.41 
   6   1  -5    0.12    0.09 
   6   1  -5    0.08    0.15 
   6   1  -5    0.19    0.24 
   5   1  -5    6.53    0.32 
   5   1  -5    6.29    0.56 
   5   1  -5    6.24    0.44 
   5   1  -5    6.12    0.31 
  -5  -1   5    6.28    0.27 
  -5  -1   5    6.25    0.33 
   4   1  -5    3.59    0.22 
   4   1  -5    4.06    0.48 
   4   1  -5    3.74    0.21 
   4   1  -5    3.70    0.33 
  -4  -1   5    3.90    0.24 
  -4  -1   5    3.89    0.19 
   3   1  -5    5.70    0.48 
   3   1  -5    6.57    0.40 
   3   1  -5    6.58    0.30 
   3   1  -5    6.81    0.30 
  -3  -1   5    5.96    0.48 
  -3  -1   5    7.03    0.32 
  -3  -1   5    6.75    0.28 
   2   1  -5    2.74    0.16 
   2   1  -5    2.62    0.24 
   2   1  -5    2.70    0.19 
   2   1  -5    2.57    0.17 
  -2  -1   5    2.86    0.18 
  -2  -1   5    2.82    0.15 
  -2  -1   5    2.70    0.33 
   1   1  -5   32.92    1.19 
   1   1  -5   34.48    1.09 
   1   1  -5   34.67    1.13 
   1   1  -5   33.39    1.07 
  -1  -1   5   36.11    1.08 
  -1  -1   5   33.13    1.11 
  -1  -1   5   33.47    1.35 
   0   1  -5   95.75    2.90 
   0   1  -5   97.77    3.14 
   0   1  -5  101.63    2.92 
   0   1  -5   99.88    3.09 
   0  -1   5   99.27    2.90 
   0  -1   5   99.01    3.39 
  -1   1  -5   75.51    2.20 
  -1   1  -5   74.53    2.32 
  -1   1  -5   70.85    2.18 
  -1   1  -5   75.44    2.36 
   1  -1   5   68.86    2.53 
   1  -1   5   78.99    2.41 
   1  -1   5   69.84    2.19 
   1  -1   5   73.06    2.32 
  -2   1  -5   56.09    1.85 
  -2   1  -5   56.45    1.73 
  -2   1  -5   58.06    1.74 
  -2   1  -5   58.15    1.84 
   2  -1   5   56.53    1.74 
   2  -1   5   60.56    1.87 
   2  -1   5   53.83    1.83 
  -3   1  -5    3.73    0.23 
  -3   1  -5    3.85    0.23 
  -3   1  -5    4.03    0.23 
   3  -1   5    4.51    0.27 
   3  -1   5    4.42    0.25 
  -4   1  -5    0.71    0.10 
  -4   1  -5    0.86    0.12 
  -4   1  -5    1.18    0.15 
   4  -1   5    1.37    0.17 
   4  -1   5    0.89    0.13 
  -5   1  -5    0.76    0.12 
  -5   1  -5    0.68    0.12 
   5  -1   5    0.62    0.13 
   5  -1   5    0.63    0.12 
  -6   1  -5   24.19    0.86 
   6  -1   5   22.91    0.86 
   6  -1   5   23.17    0.91 
  -7   1  -5   10.19    0.44 
   7  -1   5    9.29    0.47 
   7  -1   5    9.02    0.50 
  -8   1  -5   25.03    0.89 
   8  -1   5   23.00    0.91 
   8  -1   5   22.59    0.98 
  -9   1  -5    9.10    0.44 
   9  -1   5   10.11    0.53 
   9  -1   5    9.62    0.59 
   9  -1   5    9.14    0.58 
  10  -1   5   17.24    0.89 
  10  -1   5   17.69    0.80 
  10  -1   5   17.45    0.90 
   8   0  -5    0.09    0.22 
   7   0  -5    1.92    0.23 
   7   0  -5    1.45    0.30 
   6   0  -5    0.17    0.10 
   6   0  -5   -0.02    0.14 
   5   0  -5    4.17    0.24 
   5   0  -5    3.60    0.38 
   5   0  -5    3.76    0.25 
  -5   0   5    3.95    0.22 
  -5   0   5    3.72    0.26 
   4   0  -5    5.73    0.41 
   4   0  -5    5.90    0.29 
   4   0  -5    5.40    0.29 
  -4   0   5    6.51    0.52 
  -4   0   5    5.60    0.27 
  -4   0   5    5.95    0.31 
   3   0  -5   54.57    1.99 
   3   0  -5   61.02    1.88 
   3   0  -5   58.74    1.78 
  -3   0   5   58.17    1.86 
  -3   0   5   56.08    2.18 
  -3   0   5   59.92    1.80 
   2   0  -5   47.30    1.48 
   2   0  -5   49.68    1.67 
   2   0  -5   49.07    1.56 
  -2   0   5   48.01    1.49 
  -2   0   5   46.90    1.83 
   1   0  -5  112.38    3.24 
   1   0  -5  107.73    3.50 
   1   0  -5  106.50    3.21 
   1   0  -5  111.58    3.42 
  -1   0   5  114.27    3.42 
  -1   0   5  110.73    3.22 
  -1   0   5  104.51    3.75 
   0   0  -5    0.97    0.13 
   0   0  -5    1.08    0.15 
   0   0  -5    0.97    0.11 
   0   0  -5    0.71    0.10 
   0   0   5    0.67    0.09 
   0   0   5    0.52    0.15 
   0   0   5    0.88    0.11 
   0   0   5    0.69    0.13 
  -1   0  -5    4.10    0.23 
  -1   0  -5    4.05    0.24 
  -1   0  -5    3.87    0.20 
  -1   0  -5    4.07    0.22 
   1   0   5    4.03    0.23 
   1   0   5    4.25    0.25 
   1   0   5    3.91    0.21 
  -2   0  -5    0.29    0.08 
  -2   0  -5    0.47    0.09 
  -2   0  -5    0.25    0.08 
  -2   0  -5    0.33    0.09 
   2   0   5    0.60    0.10 
   2   0   5    0.36    0.09 
   2   0   5    0.22    0.07 
  -3   0  -5   33.10    1.12 
  -3   0  -5   34.61    1.13 
  -3   0  -5   32.62    1.07 
   3   0   5   32.22    1.13 
   3   0   5   35.14    1.15 
   3   0   5   32.19    1.08 
  -4   0  -5   10.06    0.43 
  -4   0  -5   10.63    0.43 
  -4   0  -5   10.54    0.44 
   4   0   5   11.17    0.46 
   4   0   5   10.06    0.44 
  -5   0  -5    2.82    0.19 
  -5   0  -5    2.99    0.21 
   5   0   5    2.43    0.23 
   5   0   5    2.82    0.22 
   5   0   5    3.03    0.22 
  -6   0  -5   33.84    1.15 
   6   0   5   33.19    1.20 
   6   0   5   32.99    1.14 
  -7   0  -5   52.96    1.80 
   7   0   5   57.38    1.90 
   7   0   5   54.00    1.76 
  -8   0  -5   13.48    0.57 
   8   0   5   14.57    0.69 
   8   0   5   14.99    0.64 
   9   0   5    0.29    0.15 
   9   0   5    0.07    0.13 
  10   0   5   19.58    1.01 
  10   0   5   19.76    0.85 
  10   0   5   19.75    0.96 
  11   0   5    0.01    0.15 
   8  -1  -5    0.49    0.15 
   8  -1  -5   -0.15    0.19 
   7  -1  -5   -0.07    0.17 
   7  -1  -5    0.28    0.12 
   6  -1  -5    1.13    0.17 
   6  -1  -5    1.54    0.29 
   5  -1  -5    0.42    0.11 
   5  -1  -5    0.47    0.10 
   5  -1  -5    0.42    0.19 
  -5   1   5    0.13    0.05 
  -5   1   5    0.29    0.11 
   4  -1  -5    7.97    0.35 
   4  -1  -5    6.89    0.46 
   4  -1  -5    7.72    0.36 
  -4   1   5    7.55    0.34 
  -4   1   5    7.60    0.37 
  -4   1   5    7.56    0.55 
   3  -1  -5   21.82    0.74 
   3  -1  -5   19.16    0.71 
   3  -1  -5   19.32    0.85 
  -3   1   5   20.36    0.72 
  -3   1   5   19.83    0.95 
  -3   1   5   21.78    0.73 
   2  -1  -5   16.97    0.74 
   2  -1  -5   17.87    0.63 
   2  -1  -5   17.98    0.64 
  -2   1   5   18.61    0.64 
  -2   1   5   17.52    0.83 
  -2   1   5   17.88    0.64 
   1  -1  -5   16.47    0.68 
   1  -1  -5   16.49    0.60 
   1  -1  -5   17.58    0.61 
  -1   1   5   17.38    0.61 
  -1   1   5   16.92    0.77 
  -1   1   5   16.91    0.61 
   0  -1  -5    0.24    0.06 
   0  -1  -5    0.32    0.09 
   0  -1  -5    0.14    0.07 
   0  -1  -5    0.09    0.07 
   0   1   5    0.32    0.08 
   0   1   5    0.09    0.05 
   0   1   5    0.27    0.10 
  -1  -1  -5    5.69    0.27 
  -1  -1  -5    5.75    0.27 
  -1  -1  -5    5.74    0.29 
  -1  -1  -5    6.06    0.26 
   1   1   5    5.37    0.26 
   1   1   5    5.75    0.31 
   1   1   5    5.53    0.26 
   1   1   5    5.49    0.28 
  -2  -1  -5   15.80    0.55 
  -2  -1  -5   15.20    0.54 
  -2  -1  -5   14.04    0.56 
  -2  -1  -5   14.95    0.54 
   2   1   5   14.97    0.58 
   2   1   5   14.75    0.55 
   2   1   5   13.81    0.54 
  -3  -1  -5   62.48    1.99 
  -3  -1  -5   62.07    1.90 
  -3  -1  -5   60.60    2.00 
  -3  -1  -5   61.57    1.88 
   3   1   5   62.81    1.90 
   3   1   5   63.07    2.01 
   3   1   5   63.74    2.03 
  -4  -1  -5    1.45    0.15 
  -4  -1  -5    1.72    0.15 
  -4  -1  -5    1.68    0.16 
   4   1   5    1.55    0.16 
   4   1   5    1.76    0.18 
   4   1   5    1.42    0.15 
  -5  -1  -5    0.33    0.09 
  -5  -1  -5    0.21    0.07 
   5   1   5    0.21    0.09 
   5   1   5    0.29    0.09 
  -6  -1  -5    0.88    0.14 
  -6  -1  -5    0.84    0.11 
   6   1   5    0.82    0.14 
   6   1   5    0.83    0.15 
   6   1   5    0.62    0.12 
  -7  -1  -5   11.72    0.48 
   7   1   5   10.74    0.55 
   7   1   5   11.78    0.53 
   7   1   5   12.71    0.55 
  -8  -1  -5    4.57    0.26 
   8   1   5    4.65    0.33 
   8   1   5    4.42    0.35 
   9   1   5    2.38    0.29 
   9   1   5    3.83    0.32 
  10   1   5    3.72    0.36 
  10   1   5    2.60    0.35 
  10   1   5    3.02    0.44 
  11   1   5    9.90    0.66 
  11   1   5   10.01    0.75 
  11   1   5    9.46    0.57 
   8  -2  -5   13.09    0.63 
   8  -2  -5   14.14    0.87 
   7  -2  -5    8.50    0.64 
   7  -2  -5    9.06    0.47 
   6  -2  -5    2.93    0.37 
   6  -2  -5    3.34    0.26 
   5  -2  -5    8.17    0.55 
   5  -2  -5    8.39    0.41 
   5  -2  -5    8.93    0.40 
  -5   2   5    8.30    0.38 
   4  -2  -5    2.69    0.33 
   4  -2  -5    1.75    0.18 
   4  -2  -5    2.44    0.18 
  -4   2   5    2.10    0.16 
  -4   2   5    2.24    0.21 
  -4   2   5    2.57    0.37 
   3  -2  -5   23.83    0.83 
   3  -2  -5   25.10    0.85 
   3  -2  -5   23.44    0.98 
  -3   2   5   23.52    0.84 
  -3   2   5   25.02    0.85 
  -3   2   5   23.61    1.07 
   2  -2  -5    1.84    0.15 
   2  -2  -5    1.84    0.24 
  -2   2   5    1.86    0.16 
  -2   2   5    1.63    0.13 
  -2   2   5    1.41    0.23 
   1  -2  -5    5.72    0.27 
   1  -2  -5    6.10    0.26 
   1  -2  -5    5.54    0.33 
  -1   2   5    5.89    0.28 
  -1   2   5    5.70    0.26 
  -1   2   5    5.19    0.34 
   0  -2  -5    1.17    0.14 
   0  -2  -5    1.40    0.14 
   0  -2  -5    1.30    0.14 
   0  -2  -5    1.62    0.12 
   0   2   5    1.61    0.14 
   0   2   5    1.99    0.22 
   0   2   5    1.51    0.13 
  -1  -2  -5  145.94    4.39 
  -1  -2  -5  136.48    4.43 
  -1  -2  -5  144.74    4.14 
  -1  -2  -5  145.03    4.13 
   1   2   5  142.22    4.12 
   1   2   5  143.05    4.46 
   1   2   5  135.83    4.39 
  -2  -2  -5   14.13    0.54 
  -2  -2  -5   14.29    0.52 
  -2  -2  -5   13.83    0.52 
   2   2   5   14.37    0.53 
   2   2   5   13.06    0.52 
   2   2   5   14.52    0.56 
  -3  -2  -5   59.86    1.80 
  -3  -2  -5   60.10    1.90 
  -3  -2  -5   58.10    1.79 
  -3  -2  -5   59.43    1.88 
   3   2   5   57.33    1.80 
   3   2   5   59.15    1.90 
   3   2   5   58.60    1.92 
  -4  -2  -5    1.27    0.15 
  -4  -2  -5    1.26    0.13 
   4   2   5    1.73    0.18 
   4   2   5    0.88    0.13 
   4   2   5    0.93    0.12 
  -5  -2  -5    0.51    0.08 
  -5  -2  -5    0.47    0.10 
   5   2   5    0.24    0.09 
   5   2   5    0.70    0.12 
   5   2   5    0.57    0.12 
  -6  -2  -5    0.52    0.09 
  -6  -2  -5    0.57    0.11 
   6   2   5    0.59    0.11 
   6   2   5    0.71    0.14 
  -7  -2  -5    7.01    0.32 
  -7  -2  -5    7.45    0.37 
   7   2   5    7.30    0.39 
   7   2   5    7.27    0.39 
   7   2   5    7.15    0.41 
  -8  -2  -5   30.70    1.06 
   8   2   5   31.27    1.18 
   8   2   5   30.53    1.10 
   9   2   5   18.64    0.85 
   9   2   5   19.38    0.79 
  10   2   5    0.19    0.17 
  10   2   5   -0.04    0.13 
  10   2   5    0.16    0.23 
   8  -3  -5    6.49    0.42 
   8  -3  -5    5.73    0.60 
   7  -3  -5    2.94    0.42 
   7  -3  -5    3.12    0.30 
   6  -3  -5    5.31    0.34 
   6  -3  -5    5.84    0.55 
  -6   3   5    4.62    0.29 
   5  -3  -5    0.16    0.16 
   5  -3  -5    0.74    0.15 
  -5   3   5    0.32    0.20 
  -5   3   5    0.40    0.09 
   4  -3  -5    4.30    0.27 
   4  -3  -5    3.50    0.36 
  -4   3   5    4.20    0.24 
  -4   3   5    4.06    0.44 
   3  -3  -5    0.21    0.09 
   3  -3  -5    0.37    0.15 
   3  -3  -5    0.30    0.07 
  -3   3   5    0.47    0.17 
  -3   3   5    0.25    0.09 
  -3   3   5    0.35    0.08 
   2  -3  -5    9.87    0.39 
   2  -3  -5    9.95    0.50 
   2  -3  -5    9.37    0.40 
  -2   3   5    9.66    0.55 
  -2   3   5    9.88    0.42 
  -2   3   5    9.21    0.39 
   1  -3  -5   66.30    2.26 
   1  -3  -5   66.45    2.06 
   1  -3  -5   71.22    2.17 
  -1   3   5   70.31    2.08 
  -1   3   5   65.82    2.17 
  -1   3   5   69.95    2.29 
   0  -3  -5    5.83    0.27 
   0  -3  -5    5.75    0.25 
   0  -3  -5    5.61    0.31 
   0  -3  -5    5.45    0.29 
   0   3   5    5.42    0.26 
   0   3   5    6.18    0.34 
   0   3   5    5.67    0.27 
  -1  -3  -5    0.52    0.11 
  -1  -3  -5    0.37    0.06 
  -1  -3  -5    0.46    0.10 
  -1  -3  -5    0.33    0.09 
   1   3   5    0.36    0.08 
   1   3   5    0.32    0.07 
   1   3   5    0.36    0.10 
  -2  -3  -5  115.99    3.50 
  -2  -3  -5  119.90    3.75 
  -2  -3  -5  118.61    3.71 
  -2  -3  -5  126.64    3.53 
   2   3   5  114.22    3.73 
   2   3   5  121.23    3.50 
   2   3   5  123.49    3.78 
   2   3   5  119.28    3.52 
  -3  -3  -5    2.82    0.18 
  -3  -3  -5    2.92    0.19 
  -3  -3  -5    3.16    0.20 
   3   3   5    2.96    0.19 
   3   3   5    3.06    0.21 
   3   3   5    2.63    0.20 
  -4  -3  -5    0.01    0.04 
  -4  -3  -5    0.00    0.06 
  -4  -3  -5    0.09    0.07 
   4   3   5    0.02    0.05 
   4   3   5    0.06    0.06 
   4   3   5   -0.05    0.06 
  -5  -3  -5   12.23    0.48 
  -5  -3  -5   12.61    0.50 
   5   3   5   13.81    0.54 
   5   3   5   12.93    0.52 
   5   3   5   12.37    0.52 
  -6  -3  -5   12.81    0.51 
   6   3   5   13.37    0.53 
   6   3   5   11.71    0.54 
   6   3   5   13.09    0.55 
  -7  -3  -5    6.11    0.33 
  -7  -3  -5    6.04    0.28 
   7   3   5    6.04    0.36 
   7   3   5    6.25    0.35 
   7   3   5    5.99    0.35 
  -8  -3  -5    3.39    0.25 
   8   3   5    3.47    0.33 
   8   3   5    3.51    0.28 
   9   3   5    2.41    0.27 
   9   3   5    2.51    0.32 
  10   3   5    9.86    0.74 
  10   3   5    9.61    0.59 
  10   3   5    9.31    0.52 
   8  -4  -5   -0.03    0.11 
   8  -4  -5   -0.07    0.20 
   7  -4  -5    0.00    0.18 
   7  -4  -5   -0.11    0.10 
   6  -4  -5   -0.13    0.17 
   6  -4  -5   -0.17    0.09 
  -6   4   5    0.06    0.07 
   5  -4  -5    0.08    0.09 
   5  -4  -5    0.00    0.14 
  -5   4   5    0.34    0.19 
  -5   4   5    0.09    0.07 
   4  -4  -5    7.47    0.38 
   4  -4  -5    7.62    0.51 
  -4   4   5    7.20    0.52 
  -4   4   5    8.06    0.37 
   3  -4  -5    3.09    0.22 
   3  -4  -5    3.39    0.35 
  -3   4   5    3.19    0.20 
  -3   4   5    2.91    0.34 
   2  -4  -5    0.56    0.11 
   2  -4  -5    0.56    0.15 
  -2   4   5    0.56    0.10 
  -2   4   5    0.59    0.11 
  -2   4   5    0.45    0.16 
   1  -4  -5    2.45    0.18 
   1  -4  -5    2.49    0.25 
  -1   4   5    2.68    0.17 
  -1   4   5    1.70    0.22 
  -1   4   5    2.39    0.18 
   0  -4  -5   51.98    1.81 
   0  -4  -5   55.64    1.68 
   0   4   5   56.35    1.69 
   0   4   5   53.84    1.76 
   0   4   5   55.95    1.87 
  -1  -4  -5    6.48    0.32 
  -1  -4  -5    6.76    0.31 
  -1  -4  -5    7.44    0.33 
   1   4   5    7.25    0.32 
   1   4   5    6.69    0.30 
   1   4   5    7.36    0.37 
  -2  -4  -5   34.45    1.15 
  -2  -4  -5   32.74    1.09 
  -2  -4  -5   35.52    1.11 
   2   4   5   33.41    1.14 
   2   4   5   34.93    1.20 
   2   4   5   35.59    1.09 
  -3  -4  -5   71.18    2.19 
  -3  -4  -5   74.50    2.21 
   3   4   5   75.86    2.21 
   3   4   5   71.91    2.33 
   3   4   5   72.86    2.36 
  -4  -4  -5    1.28    0.15 
  -4  -4  -5    0.97    0.12 
  -4  -4  -5    1.16    0.11 
   4   4   5    1.12    0.14 
   4   4   5    1.38    0.16 
   4   4   5    1.24    0.15 
  -5  -4  -5    7.86    0.35 
  -5  -4  -5    7.71    0.31 
  -5  -4  -5    8.15    0.36 
   5   4   5    7.36    0.36 
   5   4   5    7.85    0.37 
   5   4   5    7.91    0.38 
  -6  -4  -5    7.29    0.30 
  -6  -4  -5    7.81    0.36 
   6   4   5    6.85    0.37 
   6   4   5    7.35    0.37 
   6   4   5    7.38    0.37 
  -7  -4  -5    1.84    0.13 
  -7  -4  -5    2.17    0.20 
   7   4   5    1.96    0.21 
   7   4   5    1.65    0.19 
   8   4   5   15.29    0.63 
   8   4   5   14.38    0.66 
   9   4   5    7.97    0.49 
   9   4   5    8.28    0.45 
  10   4   5   -0.11    0.22 
  10   4   5   -0.01    0.14 
   8  -5  -5    1.68    0.27 
   8  -5  -5    1.62    0.37 
   7  -5  -5    4.96    0.53 
   7  -5  -5    4.77    0.36 
   6  -5  -5   -0.08    0.17 
   6  -5  -5    0.22    0.12 
  -6   5   5    0.09    0.09 
   5  -5  -5   16.31    0.84 
   5  -5  -5   17.40    0.68 
  -5   5   5   15.89    0.65 
  -5   5   5   14.80    0.83 
   4  -5  -5    3.04    0.34 
   4  -5  -5    3.79    0.27 
  -4   5   5    3.42    0.24 
  -4   5   5    3.96    0.37 
   3  -5  -5    2.22    0.29 
   3  -5  -5    1.96    0.20 
  -3   5   5    1.67    0.26 
  -3   5   5    1.99    0.19 
   2  -5  -5    1.58    0.17 
   2  -5  -5    1.96    0.24 
  -2   5   5    1.72    0.17 
  -2   5   5    1.31    0.21 
   1  -5  -5    1.41    0.19 
   1  -5  -5    1.03    0.13 
  -1   5   5    0.87    0.17 
  -1   5   5    1.36    0.14 
   0  -5  -5    9.17    0.37 
   0  -5  -5    7.64    0.39 
   0   5   5    8.97    0.38 
   0   5   5    8.82    0.36 
   0   5   5    9.07    0.46 
  -1  -5  -5    4.38    0.25 
  -1  -5  -5    4.18    0.24 
  -1  -5  -5    4.40    0.24 
   1   5   5    4.47    0.22 
   1   5   5    4.46    0.24 
   1   5   5    4.19    0.28 
  -2  -5  -5    0.04    0.07 
  -2  -5  -5    0.20    0.06 
  -2  -5  -5    0.06    0.06 
   2   5   5    0.05    0.06 
   2   5   5    0.11    0.06 
   2   5   5    0.05    0.07 
  -3  -5  -5    4.74    0.25 
  -3  -5  -5    4.64    0.22 
  -3  -5  -5    4.75    0.25 
   3   5   5    5.10    0.26 
   3   5   5    4.97    0.28 
   3   5   5    4.51    0.24 
  -4  -5  -5    8.59    0.36 
  -4  -5  -5    8.46    0.32 
  -4  -5  -5    7.82    0.35 
   4   5   5    8.39    0.39 
   4   5   5    8.12    0.36 
   4   5   5    7.93    0.36 
  -5  -5  -5    1.61    0.10 
  -5  -5  -5    1.82    0.17 
  -5  -5  -5    1.49    0.16 
   5   5   5    1.81    0.20 
   5   5   5    1.91    0.19 
   5   5   5    1.53    0.17 
  -6  -5  -5    0.70    0.12 
  -6  -5  -5    0.88    0.08 
  -6  -5  -5    0.79    0.12 
   6   5   5    0.60    0.13 
   6   5   5    0.80    0.13 
   6   5   5    0.63    0.12 
  -7  -5  -5    1.89    0.19 
  -7  -5  -5    1.60    0.10 
   7   5   5    1.55    0.19 
   7   5   5    1.40    0.19 
   7   5   5    1.78    0.20 
   8   5   5    4.60    0.33 
   8   5   5    4.33    0.30 
   9   5   5    0.09    0.12 
  10   5   5   -0.08    0.13 
  10   5   5    0.05    0.28 
   7  -6  -5   32.67    1.46 
   7  -6  -5   31.63    1.19 
   6  -6  -5    2.68    0.28 
   6  -6  -5    2.23    0.36 
  -6   6   5    2.63    0.27 
   5  -6  -5   25.86    0.94 
   5  -6  -5   24.39    1.11 
  -5   6   5   23.25    0.92 
  -5   6   5   25.76    1.15 
   4  -6  -5    0.40    0.16 
   4  -6  -5    0.48    0.13 
  -4   6   5    0.66    0.20 
  -4   6   5    0.39    0.10 
   3  -6  -5    1.36    0.22 
   3  -6  -5    1.21    0.16 
  -3   6   5    1.57    0.18 
   2  -6  -5    0.00    0.07 
   2  -6  -5   -0.15    0.07 
  -2   6   5    0.01    0.11 
  -2   6   5    0.00    0.05 
   1  -6  -5    0.02    0.06 
   1  -6  -5    0.01    0.07 
  -1   6   5   -0.04    0.08 
  -1   6   5    0.08    0.06 
   0  -6  -5    0.53    0.11 
   0  -6  -5    0.24    0.08 
   0   6   5    0.44    0.09 
   0   6   5    0.36    0.12 
  -1  -6  -5    1.38    0.14 
  -1  -6  -5    1.25    0.15 
  -1  -6  -5    1.52    0.15 
   1   6   5    1.68    0.21 
   1   6   5    1.57    0.13 
  -2  -6  -5   41.86    1.34 
  -2  -6  -5   41.69    1.32 
  -2  -6  -5   43.00    1.37 
   2   6   5   43.61    1.46 
   2   6   5   40.92    1.38 
  -3  -6  -5   75.54    2.27 
  -3  -6  -5   76.13    2.35 
  -3  -6  -5   73.65    2.25 
   3   6   5   74.36    2.39 
   3   6   5   77.61    2.45 
  -4  -6  -5   13.23    0.43 
  -4  -6  -5   13.06    0.50 
  -4  -6  -5   12.35    0.49 
   4   6   5   12.06    0.50 
   4   6   5   12.76    0.50 
   4   6   5   14.60    0.55 
  -5  -6  -5    2.07    0.17 
  -5  -6  -5    2.25    0.17 
   5   6   5    2.09    0.20 
   5   6   5    1.99    0.18 
   5   6   5    1.97    0.17 
  -6  -6  -5   22.11    0.76 
  -6  -6  -5   21.82    0.76 
   6   6   5   22.84    0.83 
   6   6   5   20.74    0.77 
   6   6   5   21.73    0.81 
  -7  -6  -5    0.25    0.10 
   7   6   5    0.48    0.12 
   7   6   5    0.33    0.12 
  -8  -6  -5    1.87    0.20 
  -9  -6  -5    0.66    0.14 
   9   6   5    0.63    0.18 
   7  -7  -5    6.69    0.45 
   6  -7  -5    5.06    0.36 
   6  -7  -5    5.49    0.56 
  -6   7   5    4.99    0.34 
   5  -7  -5    0.64    0.16 
   5  -7  -5    0.85    0.24 
  -5   7   5    0.99    0.16 
  -5   7   5    1.16    0.26 
   4  -7  -5    1.55    0.20 
   4  -7  -5    1.44    0.24 
  -4   7   5    1.25    0.26 
  -4   7   5    1.48    0.17 
   3  -7  -5    0.14    0.12 
   3  -7  -5    0.41    0.12 
  -3   7   5    0.39    0.11 
   2  -7  -5   -0.06    0.06 
   2  -7  -5   -0.06    0.08 
  -2   7   5   -0.11    0.09 
  -2   7   5    0.06    0.06 
   1  -7  -5    0.13    0.08 
   1  -7  -5    0.12    0.09 
  -1   7   5    0.11    0.06 
  -1   7   5   -0.15    0.09 
   0  -7  -5   21.40    0.76 
   0  -7  -5   23.17    0.81 
   0   7   5   21.52    0.79 
   0   7   5   22.42    0.92 
  -1  -7  -5    9.53    0.40 
  -1  -7  -5   10.77    0.44 
  -1  -7  -5    9.99    0.41 
   1   7   5   10.24    0.51 
   1   7   5    9.91    0.41 
  -2  -7  -5   66.04    2.08 
  -2  -7  -5   64.02    2.00 
  -2  -7  -5   67.91    2.03 
   2   7   5   65.96    2.12 
   2   7   5   68.61    2.21 
  -3  -7  -5   27.09    0.90 
  -3  -7  -5   27.06    0.89 
   3   7   5   27.49    0.99 
   3   7   5   26.10    0.92 
  -4  -7  -5    1.54    0.15 
  -4  -7  -5    1.99    0.18 
   4   7   5    1.62    0.16 
   4   7   5    1.97    0.20 
  -5  -7  -5    0.77    0.12 
  -5  -7  -5    0.79    0.12 
   5   7   5    0.57    0.11 
   5   7   5    0.58    0.11 
  -6  -7  -5    0.32    0.09 
  -6  -7  -5    0.25    0.08 
   6   7   5    0.33    0.10 
   6   7   5    0.17    0.09 
   6   7   5    0.15    0.08 
  -7  -7  -5    7.69    0.35 
   7   7   5    7.02    0.38 
  -8  -7  -5    1.65    0.18 
  -9  -7  -5    0.07    0.09 
   9   7   5   -0.01    0.12 
   6  -8  -5    5.50    0.39 
  -6   8   5    5.67    0.36 
   5  -8  -5    4.98    0.35 
  -5   8   5    5.37    0.34 
   4  -8  -5    1.34    0.20 
   4  -8  -5    1.37    0.25 
  -4   8   5    1.64    0.20 
  -4   8   5    1.46    0.27 
   3  -8  -5   14.82    0.69 
   3  -8  -5   13.72    0.59 
  -3   8   5   13.78    0.59 
   2  -8  -5    2.14    0.22 
   2  -8  -5    2.03    0.23 
  -2   8   5    2.00    0.18 
  -2   8   5    1.76    0.27 
   1  -8  -5    2.75    0.21 
   1  -8  -5    2.95    0.22 
  -1   8   5    3.20    0.36 
  -1   8   5    2.59    0.19 
   0  -8  -5   27.03    0.91 
   0  -8  -5   27.33    0.94 
   0   8   5   25.86    0.94 
   0   8   5   28.41    1.10 
  -1  -8  -5    3.61    0.25 
  -1  -8  -5    4.12    0.19 
  -1  -8  -5    3.94    0.23 
   1   8   5    3.80    0.22 
   1   8   5    4.01    0.32 
  -2  -8  -5    2.58    0.18 
  -2  -8  -5    2.36    0.19 
   2   8   5    2.76    0.24 
   2   8   5    2.39    0.17 
  -3  -8  -5    0.11    0.07 
  -3  -8  -5    0.15    0.08 
   3   8   5    0.27    0.10 
   3   8   5    0.24    0.07 
  -4  -8  -5   11.05    0.43 
  -4  -8  -5   11.01    0.44 
   4   8   5   11.33    0.50 
   4   8   5   10.47    0.44 
  -5  -8  -5    8.63    0.36 
  -5  -8  -5    9.26    0.37 
   5   8   5    8.25    0.38 
   5   8   5    8.44    0.42 
  -6  -8  -5   -0.02    0.06 
   6   8   5    0.02    0.07 
  -7  -8  -5   22.55    0.76 
   7   8   5   20.93    0.83 
  -8  -8  -5    0.01    0.07 
   8   8   5    0.17    0.10 
   6  -9  -5    2.69    0.31 
  -6   9   5    2.56    0.27 
   5  -9  -5    2.89    0.30 
  -5   9   5    2.02    0.22 
   4  -9  -5    1.10    0.19 
  -4   9   5    0.92    0.16 
   3  -9  -5    0.70    0.16 
  -3   9   5    0.74    0.15 
   2  -9  -5    0.19    0.10 
  -2   9   5    0.42    0.10 
   1  -9  -5   -0.01    0.07 
  -1   9   5    0.00    0.07 
   0  -9  -5    0.21    0.08 
   0  -9  -5    0.04    0.06 
   0   9   5    0.10    0.07 
   0   9   5    0.05    0.13 
  -1  -9  -5    0.78    0.12 
  -1  -9  -5    0.79    0.13 
   1   9   5    0.57    0.11 
   1   9   5    0.83    0.18 
  -2  -9  -5    0.42    0.09 
  -2  -9  -5    0.41    0.11 
   2   9   5    0.48    0.15 
   2   9   5    0.55    0.10 
  -3  -9  -5    3.99    0.24 
  -3  -9  -5    4.36    0.23 
   3   9   5    4.41    0.24 
   3   9   5    4.52    0.31 
  -4  -9  -5   19.93    0.67 
   4   9   5   19.83    0.79 
   4   9   5   19.50    0.72 
  -5  -9  -5   10.94    0.42 
   5   9   5   11.04    0.46 
  -6  -9  -5    6.58    0.29 
   6   9   5    6.17    0.33 
  -7  -9  -5    3.45    0.20 
   7   9   5    3.73    0.26 
  -8  -9  -5    4.74    0.25 
   8   9   5    4.68    0.32 
   5 -10  -5   46.44    1.60 
  -5  10   5   46.02    1.64 
   4 -10  -5    1.22    0.19 
  -4  10   5    1.31    0.18 
   3 -10  -5    5.93    0.36 
  -3  10   5    6.50    0.37 
   2 -10  -5    0.74    0.14 
  -2  10   5    0.64    0.14 
   1 -10  -5    5.54    0.32 
  -1  10   5    5.17    0.30 
   0 -10  -5   12.90    0.52 
   0  10   5   13.30    0.54 
  -1 -10  -5   10.85    0.43 
   1  10   5    9.84    0.44 
  -2 -10  -5    3.65    0.22 
   2  10   5    3.58    0.22 
  -3 -10  -5   26.20    0.84 
   3  10   5   25.03    0.90 
  -4 -10  -5    1.07    0.11 
   4  10   5    0.91    0.13 
  -5 -10  -5    5.27    0.24 
   5  10   5    5.66    0.30 
  -6 -10  -5    2.89    0.16 
   6  10   5    2.68    0.22 
   7  10   5    8.85    0.44 
   3 -11  -5    0.21    0.12 
  -3  11   5    0.07    0.09 
   2 -11  -5    0.39    0.12 
  -2  11   5    0.42    0.11 
   1 -11  -5    1.19    0.17 
  -1  11   5    1.13    0.16 
   0 -11  -5   10.36    0.45 
   0  11   5   10.10    0.46 
  -1 -11  -5   15.09    0.56 
   1  11   5   14.36    0.59 
  -2 -11  -5    3.24    0.20 
   2  11   5    2.91    0.21 
  -3 -11  -5   16.05    0.55 
   3  11   5   15.54    0.61 
  -4 -11  -5    2.14    0.14 
   4  11   5    2.25    0.19 
   5  11   5    0.20    0.09 
   6  11   5    0.49    0.12 
   2 -12  -5    2.35    0.25 
  -2  12   5    2.73    0.27 
   1 -12  -5    0.55    0.13 
  -1  12   5    0.89    0.15 
   0 -12  -5    1.24    0.16 
   0  12   5    1.41    0.17 
  -1 -12  -5    0.26    0.09 
   1  12   5    0.39    0.10 
  -2 -12  -5    4.17    0.23 
   2  12   5    3.98    0.25 
  -3 -12  -5    1.37    0.13 
   3  12   5    1.29    0.16 
   4  12   5    0.60    0.12 
   1   9  -6    5.79    0.32 
   0   9  -6    8.28    0.40 
  -1   9  -6    3.42    0.25 
  -2   9  -6   15.90    0.65 
   2  -9   6   15.39    0.60 
  -3   9  -6    7.61    0.40 
   3  -9   6    7.68    0.40 
  -4   9  -6    7.54    0.41 
   4  -9   6    7.12    0.41 
  -5   9  -6    3.92    0.30 
   5  -9   6    3.84    0.32 
   3   8  -6    0.59    0.28 
   3   8  -6    1.47    0.18 
   2   8  -6    0.55    0.13 
   2   8  -6    0.81    0.28 
   1   8  -6    0.95    0.15 
   1   8  -6    0.31    0.24 
   0   8  -6    6.01    0.33 
  -1   8  -6    0.60    0.13 
   1  -8   6    0.65    0.12 
  -2   8  -6    0.20    0.09 
   2  -8   6    0.26    0.10 
  -3   8  -6    7.39    0.39 
   3  -8   6    7.39    0.39 
  -4   8  -6    0.42    0.12 
   4  -8   6    0.37    0.13 
  -5   8  -6   -0.12    0.08 
   5  -8   6   -0.04    0.09 
  -6   8  -6    4.10    0.31 
   6  -8   6    3.93    0.34 
   4   7  -6    0.45    0.14 
   3   7  -6    8.99    0.72 
   3   7  -6    8.58    0.44 
   2   7  -6   -0.08    0.18 
   2   7  -6   -0.07    0.07 
   1   7  -6    0.39    0.22 
   1   7  -6    0.34    0.11 
   0   7  -6    1.15    0.15 
  -1   7  -6   -0.02    0.07 
   1  -7   6    0.10    0.07 
  -2   7  -6    4.74    0.27 
  -2   7  -6    4.92    0.29 
   2  -7   6    4.52    0.28 
  -3   7  -6    0.89    0.15 
   3  -7   6    0.75    0.14 
  -4   7  -6    1.41    0.18 
   4  -7   6    1.23    0.18 
  -5   7  -6    3.14    0.26 
   5  -7   6    3.25    0.30 
  -6   7  -6    2.63    0.26 
   6  -7   6    2.60    0.29 
  -7   7  -6    1.78    0.22 
   7  -7   6    1.38    0.24 
   5   6  -6    6.20    0.43 
   4   6  -6    4.78    0.59 
   4   6  -6    4.21    0.33 
   3   6  -6    3.96    0.29 
   3   6  -6    3.86    0.50 
   2   6  -6    0.78    0.15 
   2   6  -6    0.72    0.25 
   1   6  -6    0.84    0.27 
   1   6  -6    0.38    0.11 
   1   6  -6    0.54    0.11 
   0   6  -6   10.54    0.44 
   0   6  -6   10.86    0.41 
   0   6  -6    9.96    0.46 
   0  -6   6    9.57    0.62 
  -1   6  -6   18.43    0.69 
  -1   6  -6   18.38    0.64 
  -1   6  -6   17.32    0.69 
   1  -6   6   17.02    0.64 
   1  -6   6   17.77    0.85 
  -2   6  -6    2.24    0.20 
  -2   6  -6    2.62    0.20 
  -2   6  -6    2.54    0.24 
   2  -6   6    2.35    0.22 
   2  -6   6    2.59    0.30 
  -3   6  -6    0.90    0.14 
   3  -6   6    1.13    0.16 
  -4   6  -6   16.39    0.67 
   4  -6   6   15.92    0.66 
  -5   6  -6   52.35    1.81 
   5  -6   6   54.20    1.75 
  -6   6  -6    5.38    0.34 
   6  -6   6    5.67    0.38 
  -7   6  -6    0.53    0.14 
   7  -6   6    0.37    0.15 
  -8   6  -6    0.88    0.17 
   8  -6   6    0.88    0.21 
   5   5  -6    4.21    0.37 
   5   5  -6    5.51    0.67 
   4   5  -6    0.60    0.17 
   4   5  -6    1.12    0.34 
   3   5  -6    0.06    0.10 
   3   5  -6    0.08    0.20 
   2   5  -6    2.49    0.24 
   2   5  -6    2.65    0.39 
   2   5  -6    2.39    0.17 
   2   5  -6    2.55    0.16 
   1   5  -6    0.64    0.10 
   1   5  -6    0.62    0.13 
   1   5  -6    0.47    0.10 
  -1  -5   6    0.35    0.21 
   0   5  -6    2.74    0.19 
   0   5  -6    2.64    0.18 
   0   5  -6    2.44    0.21 
   0  -5   6    3.11    0.38 
  -1   5  -6   28.25    0.96 
  -1   5  -6   25.07    0.96 
  -1   5  -6   27.92    0.90 
   1  -5   6   26.27    1.13 
   1  -5   6   26.25    0.90 
  -2   5  -6   61.41    2.07 
  -2   5  -6   64.63    2.07 
  -2   5  -6   62.59    1.93 
   2  -5   6   62.89    2.26 
   2  -5   6   63.10    1.95 
  -3   5  -6   45.36    1.56 
  -3   5  -6   46.61    1.57 
   3  -5   6   46.82    1.53 
   3  -5   6   45.49    1.67 
   3  -5   6   45.18    1.48 
  -4   5  -6    6.16    0.36 
  -4   5  -6    6.26    0.34 
   4  -5   6    6.20    0.35 
   4  -5   6    6.43    0.35 
   4  -5   6    5.85    0.33 
  -5   5  -6   29.99    1.07 
   5  -5   6   30.28    1.02 
   5  -5   6   25.33    1.07 
   5  -5   6   30.37    1.06 
  -6   5  -6    0.71    0.14 
   6  -5   6    0.78    0.17 
  -7   5  -6    0.44    0.13 
   7  -5   6    0.69    0.18 
  -8   5  -6    0.13    0.11 
   8  -5   6    0.19    0.14 
  -9   5  -6    6.19    0.39 
   9  -5   6    5.36    0.42 
   6   4  -6    2.22    0.33 
   5   4  -6    1.57    0.26 
   5   4  -6    2.02    0.41 
   4   4  -6    0.14    0.21 
   4   4  -6    0.07    0.12 
   3   4  -6    1.23    0.33 
   3   4  -6    0.94    0.12 
   3   4  -6    1.05    0.12 
   3   4  -6    1.24    0.20 
   2   4  -6    0.08    0.10 
   2   4  -6    0.08    0.06 
   2   4  -6    0.16    0.07 
   2   4  -6    0.28    0.18 
   1   4  -6   18.03    0.65 
   1   4  -6   16.84    0.69 
   1   4  -6   17.63    0.61 
  -1  -4   6   17.69    0.90 
   0   4  -6    5.70    0.32 
   0   4  -6    5.38    0.28 
   0   4  -6    6.33    0.29 
   0  -4   6    5.78    0.45 
  -1   4  -6    2.12    0.17 
  -1   4  -6    2.18    0.21 
  -1   4  -6    1.99    0.17 
   1  -4   6    1.97    0.19 
   1  -4   6    2.22    0.30 
   1  -4   6    1.97    0.13 
  -2   4  -6    5.55    0.29 
  -2   4  -6    5.33    0.30 
  -2   4  -6    4.90    0.27 
   2  -4   6    5.27    0.26 
   2  -4   6    5.08    0.36 
   2  -4   6    4.86    0.29 
  -3   4  -6   23.73    0.90 
  -3   4  -6   26.28    0.92 
   3  -4   6   24.53    0.87 
   3  -4   6   24.01    0.98 
   3  -4   6   24.29    0.89 
  -4   4  -6    4.92    0.29 
  -4   4  -6    5.29    0.31 
   4  -4   6    5.05    0.31 
   4  -4   6    4.65    0.30 
  -5   4  -6    0.55    0.12 
  -5   4  -6    0.71    0.15 
   5  -4   6    0.82    0.13 
   5  -4   6    0.83    0.16 
   5  -4   6    0.66    0.14 
  -6   4  -6   18.97    0.75 
   6  -4   6   19.00    0.81 
   6  -4   6   18.64    0.77 
   6  -4   6   18.73    0.70 
  -7   4  -6   21.86    0.85 
   7  -4   6   22.13    0.94 
   7  -4   6   20.95    0.87 
  -8   4  -6    0.03    0.09 
   8  -4   6   -0.07    0.10 
  -9   4  -6    0.56    0.15 
   9  -4   6    0.15    0.14 
   6   3  -6    3.19    0.38 
   6   3  -6    3.48    0.56 
   5   3  -6    3.01    0.34 
   5   3  -6    3.44    0.50 
   4   3  -6   13.76    0.88 
   4   3  -6   14.69    0.69 
   4   3  -6   14.17    0.54 
   3   3  -6    2.68    0.29 
   3   3  -6    2.44    0.17 
   3   3  -6    2.34    0.37 
   3   3  -6    2.94    0.19 
  -3  -3   6    2.65    0.19 
   2   3  -6   29.13    1.15 
   2   3  -6   31.83    1.02 
   2   3  -6   33.64    1.08 
  -2  -3   6   31.52    1.02 
  -2  -3   6   33.10    1.46 
   1   3  -6    9.91    0.39 
   1   3  -6    9.98    0.41 
   1   3  -6    8.73    0.45 
  -1  -3   6   10.44    0.62 
   0   3  -6    0.93    0.12 
   0   3  -6    1.09    0.13 
   0   3  -6    0.91    0.14 
   0  -3   6    1.27    0.23 
   0  -3   6    0.77    0.09 
  -1   3  -6    0.18    0.08 
  -1   3  -6    0.26    0.07 
  -1   3  -6    0.16    0.08 
   1  -3   6    0.14    0.06 
   1  -3   6    0.22    0.09 
   1  -3   6    0.14    0.13 
  -2   3  -6   14.69    0.56 
  -2   3  -6   13.88    0.57 
  -2   3  -6   14.06    0.53 
   2  -3   6   13.25    0.66 
   2  -3   6   13.91    0.54 
   2  -3   6   14.19    0.55 
  -3   3  -6   16.92    0.66 
  -3   3  -6   16.95    0.66 
   3  -3   6   16.90    0.65 
   3  -3   6   17.03    0.73 
  -4   3  -6    8.53    0.43 
  -4   3  -6   10.37    0.46 
   4  -3   6    9.72    0.45 
   4  -3   6    9.38    0.44 
   4  -3   6    9.68    0.47 
  -5   3  -6   52.16    1.78 
   5  -3   6   53.02    1.72 
   5  -3   6   54.22    1.82 
  -6   3  -6    2.99    0.24 
   6  -3   6    3.30    0.29 
   6  -3   6    3.28    0.28 
  -7   3  -6   13.23    0.58 
   7  -3   6   13.35    0.66 
   7  -3   6   13.67    0.63 
  -8   3  -6    1.83    0.22 
   8  -3   6    1.95    0.27 
   8  -3   6    2.27    0.30 
  -9   3  -6    2.37    0.25 
   9  -3   6    2.66    0.32 
   9  -3   6    2.57    0.33 
  10  -3   6    2.89    0.34 
   7   2  -6    4.74    0.51 
   6   2  -6   20.39    1.16 
   6   2  -6   18.30    0.92 
   5   2  -6   38.05    1.72 
   5   2  -6   36.63    1.22 
   5   2  -6   38.28    1.47 
   4   2  -6   15.26    0.73 
   4   2  -6   15.72    0.58 
  -4  -2   6   14.92    0.59 
   3   2  -6    0.91    0.13 
   3   2  -6    1.02    0.19 
   3   2  -6    0.94    0.12 
  -3  -2   6    0.84    0.13 
   2   2  -6    3.01    0.26 
   2   2  -6    2.91    0.20 
   2   2  -6    2.96    0.19 
  -2  -2   6    3.01    0.40 
  -2  -2   6    2.98    0.15 
  -2  -2   6    3.43    0.21 
   1   2  -6    0.79    0.10 
   1   2  -6    0.83    0.12 
   1   2  -6    0.92    0.16 
  -1  -2   6    0.83    0.11 
  -1  -2   6    0.83    0.09 
  -1  -2   6    1.21    0.24 
   0   2  -6    2.42    0.18 
   0   2  -6    2.81    0.18 
   0   2  -6    2.48    0.21 
   0  -2   6    2.43    0.30 
  -1   2  -6   15.64    0.66 
  -1   2  -6   17.09    0.62 
  -1   2  -6   18.10    0.65 
  -1   2  -6   17.86    0.66 
   1  -2   6   17.06    0.78 
   1  -2   6   17.40    0.63 
  -2   2  -6    3.40    0.23 
  -2   2  -6    3.73    0.22 
  -2   2  -6    3.53    0.22 
   2  -2   6    3.92    0.24 
   2  -2   6    3.61    0.30 
  -3   2  -6   27.99    0.95 
  -3   2  -6   26.30    0.95 
   3  -2   6   25.22    0.93 
   3  -2   6   26.09    0.91 
  -4   2  -6    0.95    0.13 
  -4   2  -6    0.96    0.13 
   4  -2   6    1.15    0.15 
   4  -2   6    1.17    0.16 
  -5   2  -6   65.15    2.07 
  -5   2  -6   60.85    2.02 
   5  -2   6   58.82    2.05 
   5  -2   6   60.51    1.94 
  -6   2  -6   47.96    1.62 
   6  -2   6   48.27    1.68 
   6  -2   6   47.27    1.58 
  -7   2  -6    1.32    0.18 
   7  -2   6    1.17    0.22 
   7  -2   6    0.85    0.18 
  -8   2  -6   -0.04    0.08 
   8  -2   6   -0.01    0.12 
   8  -2   6    0.18    0.14 
  -9   2  -6    1.47    0.20 
   9  -2   6    1.60    0.27 
   9  -2   6    1.70    0.30 
  10  -2   6    0.03    0.18 
  10  -2   6    0.10    0.14 
   7   1  -6    2.79    0.41 
   6   1  -6    0.36    0.12 
   6   1  -6    0.16    0.18 
   5   1  -6    0.22    0.17 
   5   1  -6    0.12    0.09 
   4   1  -6   10.55    0.45 
   4   1  -6   10.44    0.45 
   4   1  -6   10.63    0.59 
  -4  -1   6   11.25    0.47 
  -4  -1   6   10.60    0.41 
   3   1  -6    3.69    0.23 
   3   1  -6    4.32    0.23 
   3   1  -6    3.64    0.32 
  -3  -1   6    3.90    0.24 
  -3  -1   6    3.39    0.19 
   2   1  -6    1.23    0.13 
   2   1  -6    0.65    0.14 
   2   1  -6    0.89    0.12 
  -2  -1   6    0.99    0.24 
  -2  -1   6    0.93    0.11 
  -2  -1   6    1.10    0.14 
   1   1  -6   30.36    1.11 
   1   1  -6   29.82    0.99 
   1   1  -6   30.27    1.03 
  -1  -1   6   30.84    1.28 
  -1  -1   6   31.35    1.00 
  -1  -1   6   29.38    1.01 
   0   1  -6    6.01    0.29 
   0   1  -6    5.92    0.27 
   0   1  -6    5.19    0.31 
   0   1  -6    5.70    0.28 
   0  -1   6    5.13    0.26 
   0  -1   6    4.80    0.25 
   0  -1   6    5.76    0.40 
  -1   1  -6    0.15    0.08 
  -1   1  -6    0.04    0.05 
  -1   1  -6    0.14    0.08 
  -1   1  -6    0.05    0.07 
   1  -1   6    0.20    0.07 
   1  -1   6    0.10    0.07 
   1  -1   6    0.15    0.13 
  -2   1  -6    0.55    0.11 
  -2   1  -6    0.46    0.10 
  -2   1  -6    0.62    0.11 
  -2   1  -6    0.46    0.10 
   2  -1   6    0.56    0.11 
   2  -1   6    0.68    0.11 
  -3   1  -6    8.81    0.39 
  -3   1  -6    8.52    0.39 
  -3   1  -6    8.40    0.39 
   3  -1   6    8.52    0.39 
  -4   1  -6   81.17    2.65 
  -4   1  -6   82.77    2.65 
   4  -1   6   84.54    2.51 
   4  -1   6   80.86    2.65 
  -5   1  -6   12.13    0.51 
   5  -1   6   11.92    0.53 
   5  -1   6   11.50    0.51 
  -6   1  -6    7.35    0.37 
   6  -1   6    7.79    0.43 
   6  -1   6    7.78    0.41 
  -7   1  -6   25.69    0.96 
   7  -1   6   25.25    0.97 
   7  -1   6   27.27    1.04 
  -8   1  -6   15.93    0.64 
   8  -1   6   14.56    0.73 
   8  -1   6   15.32    0.69 
  -9   1  -6    1.97    0.22 
   9  -1   6    1.62    0.28 
   9  -1   6    1.42    0.23 
  10  -1   6    0.08    0.19 
  10  -1   6    0.41    0.18 
   7   0  -6    1.19    0.31 
   6   0  -6   15.61    0.85 
   6   0  -6   16.09    0.65 
   5   0  -6    0.06    0.15 
   5   0  -6   -0.01    0.08 
  -5   0   6   -0.09    0.08 
   4   0  -6    0.12    0.08 
   4   0  -6   -0.09    0.13 
   4   0  -6    0.20    0.07 
  -4   0   6    0.36    0.10 
  -4   0   6    0.13    0.07 
   3   0  -6    7.13    0.45 
   3   0  -6    7.34    0.34 
   3   0  -6    7.22    0.35 
  -3   0   6    7.90    0.37 
  -3   0   6    7.49    0.33 
  -3   0   6    7.27    0.55 
   2   0  -6    1.32    0.20 
   2   0  -6    1.80    0.14 
   2   0  -6    1.52    0.16 
  -2   0   6    1.51    0.27 
  -2   0   6    1.74    0.17 
   1   0  -6    4.91    0.24 
   1   0  -6    4.67    0.25 
   1   0  -6    4.19    0.30 
  -1   0   6    4.68    0.26 
  -1   0   6    4.46    0.23 
  -1   0   6    4.92    0.39 
   0   0  -6    5.67    0.33 
   0   0  -6    5.57    0.29 
   0   0  -6    5.77    0.28 
   0   0  -6    5.79    0.28 
   0   0   6    5.75    0.27 
   0   0   6    5.72    0.40 
   0   0   6    6.25    0.29 
  -1   0  -6    0.07    0.06 
  -1   0  -6    0.08    0.07 
  -1   0  -6    0.17    0.06 
  -1   0  -6    0.10    0.08 
   1   0   6    0.14    0.08 
   1   0   6    0.11    0.06 
  -2   0  -6  129.52    3.75 
  -2   0  -6  124.04    3.73 
  -2   0  -6  132.66    4.01 
  -2   0  -6  127.80    3.98 
   2   0   6  125.65    3.75 
   2   0   6  124.44    3.98 
  -3   0  -6    0.23    0.08 
  -3   0  -6    0.21    0.08 
  -3   0  -6    0.33    0.09 
  -3   0  -6    0.17    0.08 
   3   0   6    0.21    0.09 
   3   0   6    0.30    0.09 
  -4   0  -6    1.71    0.17 
  -4   0  -6    2.03    0.20 
  -4   0  -6    1.93    0.17 
   4   0   6    1.39    0.16 
   4   0   6    1.74    0.19 
  -5   0  -6   10.36    0.45 
   5   0   6   10.23    0.47 
   5   0   6    9.80    0.47 
  -6   0  -6    3.23    0.22 
   6   0   6    3.36    0.27 
   6   0   6    3.45    0.27 
  -7   0  -6   25.00    0.92 
   7   0   6   24.91    0.94 
   7   0   6   25.55    1.00 
  -8   0  -6    6.46    0.34 
   8   0   6    6.82    0.44 
   8   0   6    6.76    0.42 
   9   0   6    0.06    0.12 
   9   0   6   -0.13    0.12 
  10   0   6   -0.09    0.20 
  10   0   6    0.17    0.16 
  10   0   6    0.08    0.16 
   7  -1  -6    0.40    0.15 
   7  -1  -6   -0.02    0.19 
   6  -1  -6    5.21    0.54 
   6  -1  -6    6.57    0.37 
   5  -1  -6   11.85    0.69 
   5  -1  -6   12.82    0.54 
   4  -1  -6    0.49    0.17 
   4  -1  -6    0.85    0.14 
   4  -1  -6    0.76    0.12 
  -4   1   6    0.95    0.13 
  -4   1   6    0.79    0.15 
   3  -1  -6    0.23    0.09 
   3  -1  -6    0.30    0.14 
   3  -1  -6    0.12    0.05 
  -3   1   6    0.13    0.07 
  -3   1   6    0.44    0.19 
  -3   1   6    0.27    0.10 
   2  -1  -6   19.13    0.69 
   2  -1  -6   19.35    0.69 
   2  -1  -6   19.08    0.81 
  -2   1   6   19.00    0.70 
  -2   1   6   18.41    0.91 
  -2   1   6   19.54    0.70 
   1  -1  -6   17.47    0.67 
   1  -1  -6   17.85    0.74 
   1  -1  -6   16.80    0.63 
  -1   1   6   18.91    0.66 
  -1   1   6   17.78    0.84 
  -1   1   6   18.52    0.66 
   0  -1  -6    6.69    0.32 
   0  -1  -6    6.99    0.37 
   0  -1  -6    7.01    0.34 
   0  -1  -6    7.19    0.32 
   0   1   6    7.28    0.33 
   0   1   6    7.45    0.33 
  -1  -1  -6  167.46    4.71 
  -1  -1  -6  155.01    4.69 
  -1  -1  -6  155.00    5.04 
  -1  -1  -6  167.91    5.00 
   1   1   6  163.29    4.69 
   1   1   6  159.49    5.00 
  -2  -1  -6    0.94    0.13 
  -2  -1  -6    0.62    0.11 
  -2  -1  -6    0.77    0.10 
  -2  -1  -6    0.82    0.12 
   2   1   6    0.54    0.09 
   2   1   6    0.93    0.14 
   2   1   6    0.60    0.11 
  -3  -1  -6   25.98    0.85 
  -3  -1  -6   23.13    0.87 
  -3  -1  -6   24.80    0.86 
  -3  -1  -6   23.94    0.83 
   3   1   6   23.54    0.84 
   3   1   6   24.19    0.87 
   3   1   6   24.33    0.90 
  -4  -1  -6    6.57    0.33 
  -4  -1  -6    6.79    0.34 
   4   1   6    6.73    0.34 
   4   1   6    7.45    0.36 
  -5  -1  -6    1.92    0.19 
  -5  -1  -6    2.43    0.23 
   5   1   6    2.02    0.20 
   5   1   6    2.31    0.20 
   5   1   6    1.80    0.21 
  -6  -1  -6   24.22    0.90 
   6   1   6   27.36    0.97 
   6   1   6   24.86    0.92 
  -7  -1  -6   18.10    0.68 
   7   1   6   17.63    0.76 
   7   1   6   17.59    0.72 
  -8  -1  -6    0.25    0.08 
   8   1   6    0.16    0.14 
   8   1   6    0.07    0.12 
   9   1   6    0.00    0.12 
   9   1   6    0.18    0.15 
  10   1   6   13.50    0.73 
  10   1   6   12.89    0.66 
   7  -2  -6    1.48    0.22 
   7  -2  -6    1.52    0.35 
   6  -2  -6    0.61    0.15 
   6  -2  -6    0.63    0.23 
   5  -2  -6   28.97    1.23 
   5  -2  -6   29.67    1.02 
  -5   2   6   27.60    1.02 
   4  -2  -6   35.70    1.17 
   4  -2  -6   33.81    1.13 
   4  -2  -6   31.28    1.32 
  -4   2   6   32.20    1.15 
   3  -2  -6   33.04    1.10 
   3  -2  -6   31.16    1.24 
   3  -2  -6   30.92    1.06 
  -3   2   6   31.76    1.08 
  -3   2   6   30.71    1.36 
  -3   2   6   32.17    1.09 
   2  -2  -6   92.60    2.80 
   2  -2  -6   86.29    2.91 
   2  -2  -6   85.81    2.64 
  -2   2   6   86.25    2.79 
  -2   2   6   88.92    2.66 
  -2   2   6   88.05    3.13 
   1  -2  -6   17.50    0.66 
   1  -2  -6   17.72    0.63 
   1  -2  -6   17.35    0.63 
   1  -2  -6   16.93    0.72 
  -1   2   6   16.41    0.63 
  -1   2   6   17.53    0.64 
   0  -2  -6    6.69    0.33 
   0  -2  -6    6.86    0.37 
   0  -2  -6    7.70    0.32 
   0  -2  -6    7.62    0.36 
   0   2   6    7.31    0.34 
   0   2   6    7.23    0.33 
  -1  -2  -6    1.35    0.12 
  -1  -2  -6    1.02    0.14 
  -1  -2  -6    1.51    0.17 
  -1  -2  -6    1.14    0.14 
   1   2   6    1.52    0.16 
   1   2   6    1.11    0.16 
   1   2   6    1.12    0.12 
  -2  -2  -6   74.65    2.58 
  -2  -2  -6   81.55    2.42 
  -2  -2  -6   82.34    2.55 
  -2  -2  -6   82.68    2.44 
   2   2   6   77.01    2.56 
   2   2   6   82.84    2.44 
   2   2   6   83.29    2.63 
  -3  -2  -6    5.32    0.29 
  -3  -2  -6    5.69    0.29 
  -3  -2  -6    5.71    0.29 
   3   2   6    6.00    0.29 
   3   2   6    5.92    0.32 
   3   2   6    5.21    0.29 
  -4  -2  -6   52.52    1.60 
  -4  -2  -6   50.88    1.58 
  -4  -2  -6   48.57    1.66 
   4   2   6   50.53    1.70 
   4   2   6   50.17    1.68 
   4   2   6   49.99    1.60 
  -5  -2  -6   21.98    0.77 
  -5  -2  -6   20.23    0.77 
   5   2   6   20.81    0.78 
   5   2   6   20.63    0.80 
   5   2   6   22.96    0.83 
  -6  -2  -6   37.38    1.28 
  -6  -2  -6   38.27    1.27 
   6   2   6   37.24    1.28 
   6   2   6   39.50    1.35 
  -7  -2  -6    1.94    0.16 
   7   2   6    2.26    0.25 
   7   2   6    1.49    0.20 
   7   2   6    1.55    0.20 
  -8  -2  -6   19.01    0.72 
   8   2   6   19.30    0.83 
   8   2   6   19.23    0.78 
   9   2   6    8.62    0.53 
   9   2   6    9.57    0.51 
  10   2   6    0.64    0.19 
  10   2   6    0.47    0.16 
   7  -3  -6    1.17    0.20 
   7  -3  -6    0.71    0.26 
   6  -3  -6    1.19    0.20 
   6  -3  -6    1.23    0.30 
   5  -3  -6   29.80    1.04 
   5  -3  -6   29.16    1.26 
  -5   3   6   28.18    1.04 
   4  -3  -6   13.06    0.71 
   4  -3  -6   14.17    0.57 
  -4   3   6   13.16    0.55 
   3  -3  -6    0.19    0.13 
   3  -3  -6    0.43    0.12 
  -3   3   6    0.41    0.19 
  -3   3   6    0.33    0.09 
   2  -3  -6    0.52    0.11 
   2  -3  -6    0.52    0.09 
   2  -3  -6    0.74    0.16 
  -2   3   6    0.94    0.23 
  -2   3   6    0.85    0.14 
  -2   3   6    0.90    0.12 
   1  -3  -6    0.03    0.09 
   1  -3  -6   -0.01    0.04 
   1  -3  -6    0.05    0.07 
  -1   3   6   -0.06    0.04 
  -1   3   6   -0.03    0.06 
   0  -3  -6    6.17    0.29 
   0  -3  -6    6.64    0.34 
   0  -3  -6    6.27    0.31 
   0  -3  -6    6.12    0.35 
   0   3   6    6.93    0.33 
   0   3   6    7.03    0.31 
   0   3   6    5.94    0.38 
  -1  -3  -6    5.26    0.30 
  -1  -3  -6    5.30    0.28 
  -1  -3  -6    5.28    0.25 
  -1  -3  -6    5.12    0.27 
   1   3   6    5.06    0.26 
   1   3   6    4.92    0.32 
   1   3   6    5.63    0.28 
  -2  -3  -6    0.27    0.09 
  -2  -3  -6    0.06    0.07 
  -2  -3  -6    0.11    0.07 
   2   3   6    0.11    0.09 
   2   3   6    0.12    0.08 
   2   3   6    0.20    0.07 
   2   3   6    0.12    0.05 
  -3  -3  -6   -0.05    0.05 
  -3  -3  -6    0.05    0.07 
  -3  -3  -6    0.15    0.08 
   3   3   6    0.04    0.06 
   3   3   6   -0.02    0.07 
   3   3   6    0.11    0.08 
  -4  -3  -6   -0.14    0.06 
  -4  -3  -6   -0.02    0.04 
  -4  -3  -6   -0.01    0.06 
   4   3   6    0.01    0.07 
   4   3   6    0.01    0.06 
   4   3   6    0.01    0.06 
  -5  -3  -6    3.33    0.20 
  -5  -3  -6    3.77    0.24 
  -5  -3  -6    2.99    0.22 
   5   3   6    3.34    0.24 
   5   3   6    3.53    0.25 
   5   3   6    3.68    0.26 
  -6  -3  -6   40.46    1.33 
  -6  -3  -6   39.48    1.35 
   6   3   6   40.66    1.42 
   6   3   6   42.24    1.43 
   6   3   6   40.36    1.35 
  -7  -3  -6   -0.02    0.04 
  -7  -3  -6    0.12    0.10 
   7   3   6    0.03    0.10 
   7   3   6   -0.01    0.08 
   8   3   6    0.47    0.14 
   8   3   6    0.77    0.18 
   9   3   6    2.11    0.27 
   9   3   6    2.53    0.29 
  10   3   6    0.10    0.15 
  10   3   6    0.22    0.14 
   7  -4  -6    4.00    0.36 
   7  -4  -6    3.04    0.45 
   6  -4  -6    2.81    0.29 
   6  -4  -6    2.66    0.39 
   5  -4  -6    0.04    0.11 
   5  -4  -6   -0.07    0.16 
  -5   4   6   -0.02    0.07 
   4  -4  -6    3.43    0.27 
   4  -4  -6    3.79    0.42 
  -4   4   6    3.79    0.25 
   3  -4  -6    1.59    0.19 
   3  -4  -6    1.68    0.28 
  -3   4   6    1.59    0.29 
  -3   4   6    1.68    0.18 
   2  -4  -6    0.96    0.15 
   2  -4  -6    0.80    0.18 
  -2   4   6    1.12    0.15 
   1  -4  -6    9.36    0.41 
   1  -4  -6    9.42    0.48 
  -1   4   6    9.49    0.40 
   0  -4  -6   65.26    2.19 
   0  -4  -6   66.79    2.06 
   0  -4  -6   65.52    2.02 
   0   4   6   69.78    2.26 
   0   4   6   66.14    2.03 
   0   4   6   64.54    2.13 
  -1  -4  -6   11.50    0.52 
  -1  -4  -6   12.45    0.49 
  -1  -4  -6   12.57    0.51 
   1   4   6   12.10    0.49 
   1   4   6   13.12    0.50 
   1   4   6   13.02    0.58 
  -2  -4  -6    1.27    0.15 
  -2  -4  -6    1.44    0.16 
  -2  -4  -6    1.53    0.17 
   2   4   6    1.11    0.12 
   2   4   6    1.22    0.16 
   2   4   6    1.23    0.14 
  -3  -4  -6   42.09    1.34 
  -3  -4  -6   42.28    1.41 
  -3  -4  -6   43.14    1.36 
   3   4   6   43.95    1.47 
   3   4   6   42.07    1.36 
   3   4   6   40.69    1.41 
  -4  -4  -6   15.05    0.58 
  -4  -4  -6   16.34    0.61 
  -4  -4  -6   15.00    0.59 
   4   4   6   17.18    0.65 
   4   4   6   15.28    0.61 
   4   4   6   15.45    0.60 
  -5  -4  -6    0.47    0.10 
  -5  -4  -6    0.60    0.12 
   5   4   6    0.47    0.11 
   5   4   6    0.35    0.10 
   5   4   6    0.55    0.13 
  -6  -4  -6    0.75    0.13 
  -6  -4  -6    0.95    0.15 
  -6  -4  -6    0.83    0.10 
   6   4   6    1.10    0.17 
   6   4   6    0.81    0.15 
   6   4   6    1.02    0.16 
  -7  -4  -6   14.26    0.54 
  -7  -4  -6   14.75    0.60 
   7   4   6   14.51    0.64 
   7   4   6   15.78    0.65 
   7   4   6   14.64    0.62 
   8   4   6    2.18    0.25 
   8   4   6    1.50    0.21 
   9   4   6    1.49    0.25 
   9   4   6    1.57    0.23 
  10   4   6    7.73    0.52 
   7  -5  -6    0.95    0.21 
   7  -5  -6    0.85    0.28 
   6  -5  -6    0.22    0.13 
   6  -5  -6    0.17    0.21 
  -6   5   6    0.22    0.11 
   5  -5  -6    7.18    0.55 
   5  -5  -6    6.98    0.41 
  -5   5   6    7.36    0.39 
   4  -5  -6    1.35    0.26 
   4  -5  -6    1.15    0.17 
  -4   5   6    0.81    0.13 
   3  -5  -6   15.94    0.76 
   3  -5  -6   15.74    0.63 
  -3   5   6   15.58    0.81 
  -3   5   6   15.62    0.63 
   2  -5  -6   27.01    1.07 
   2  -5  -6   25.81    0.93 
  -2   5   6   27.46    0.96 
   1  -5  -6   35.52    1.30 
   1  -5  -6   35.87    1.18 
  -1   5   6   35.57    1.22 
  -1   5   6   35.91    1.36 
   0  -5  -6    8.59    0.39 
   0  -5  -6    7.54    0.39 
   0  -5  -6    7.59    0.36 
   0   5   6    7.94    0.46 
   0   5   6    7.32    0.35 
  -1  -5  -6   28.56    1.04 
  -1  -5  -6   30.15    0.98 
  -1  -5  -6   28.86    1.00 
   1   5   6   31.00    1.12 
   1   5   6   28.39    1.01 
  -2  -5  -6    2.19    0.17 
  -2  -5  -6    2.17    0.21 
  -2  -5  -6    2.02    0.19 
   2   5   6    1.98    0.16 
   2   5   6    2.44    0.25 
  -3  -5  -6    0.21    0.09 
  -3  -5  -6    0.13    0.08 
   3   5   6    0.37    0.09 
   3   5   6    0.30    0.10 
  -4  -5  -6    0.19    0.08 
  -4  -5  -6    0.14    0.08 
  -4  -5  -6    0.18    0.06 
   4   5   6    0.26    0.08 
   4   5   6    0.10    0.07 
   4   5   6    0.21    0.09 
  -5  -5  -6    3.48    0.23 
  -5  -5  -6    3.58    0.18 
  -5  -5  -6    3.30    0.23 
   5   5   6    3.58    0.25 
   5   5   6    3.10    0.24 
   5   5   6    3.04    0.23 
  -6  -5  -6    9.38    0.43 
  -6  -5  -6    9.59    0.37 
  -6  -5  -6    9.51    0.43 
   6   5   6    9.75    0.46 
   6   5   6    9.64    0.45 
   6   5   6   10.16    0.48 
  -7  -5  -6   26.09    0.91 
  -7  -5  -6   25.14    0.89 
   7   5   6   25.25    0.97 
   7   5   6   24.78    0.92 
  -8  -5  -6    4.28    0.28 
   8   5   6    4.03    0.31 
   9   5   6    8.69    0.51 
  10   5   6    1.07    0.23 
   7  -6  -6    1.33    0.22 
   7  -6  -6    1.63    0.38 
   6  -6  -6    9.36    0.51 
   6  -6  -6    8.75    0.65 
  -6   6   6    9.33    0.48 
   5  -6  -6   36.35    1.29 
   5  -6  -6   36.68    1.51 
  -5   6   6   37.39    1.32 
   4  -6  -6   10.24    0.50 
   4  -6  -6    9.40    0.60 
  -4   6   6   10.91    0.49 
   3  -6  -6   30.00    1.07 
   3  -6  -6   30.48    1.23 
  -3   6   6   30.16    1.32 
  -3   6   6   32.36    1.11 
   2  -6  -6    5.41    0.32 
   2  -6  -6    5.97    0.40 
  -2   6   6    6.07    0.31 
   1  -6  -6   13.62    0.55 
   1  -6  -6   13.11    0.61 
  -1   6   6   14.40    0.70 
  -1   6   6   13.28    0.54 
   0  -6  -6    0.87    0.14 
   0  -6  -6    1.15    0.16 
   0  -6  -6    1.07    0.15 
   0   6   6    1.12    0.21 
   0   6   6    0.81    0.11 
  -1  -6  -6    0.05    0.07 
  -1  -6  -6    0.11    0.08 
  -1  -6  -6    0.03    0.07 
   1   6   6    0.07    0.06 
   1   6   6    0.12    0.10 
  -2  -6  -6   60.12    1.88 
  -2  -6  -6   62.46    1.98 
  -2  -6  -6   62.54    1.91 
   2   6   6   57.19    1.98 
   2   6   6   64.56    2.09 
  -3  -6  -6    2.97    0.21 
  -3  -6  -6    2.88    0.17 
  -3  -6  -6    2.54    0.21 
   3   6   6    2.82    0.20 
   3   6   6    3.08    0.24 
  -4  -6  -6    1.37    0.17 
  -4  -6  -6    1.12    0.15 
  -4  -6  -6    1.26    0.10 
   4   6   6    1.00    0.13 
   4   6   6    1.25    0.18 
  -5  -6  -6   39.12    1.25 
  -5  -6  -6   39.28    1.26 
  -5  -6  -6   38.53    1.27 
   5   6   6   39.85    1.29 
   5   6   6   39.34    1.37 
   5   6   6   38.27    1.33 
  -6  -6  -6    9.97    0.36 
  -6  -6  -6    9.88    0.44 
  -6  -6  -6   10.00    0.44 
   6   6   6    9.73    0.45 
   6   6   6   10.11    0.47 
   6   6   6   10.51    0.49 
  -7  -6  -6   32.31    1.12 
   7   6   6   34.50    1.15 
   7   6   6   32.71    1.20 
  -8  -6  -6    2.29    0.23 
   8   6   6    2.68    0.29 
   8   6   6    2.35    0.25 
  -9  -6  -6    8.93    0.44 
   9   6   6    8.56    0.50 
   6  -7  -6    1.96    0.26 
  -6   7   6    1.82    0.23 
   5  -7  -6    3.98    0.33 
   5  -7  -6    5.09    0.46 
  -5   7   6    4.05    0.30 
   4  -7  -6    6.57    0.48 
   4  -7  -6    5.45    0.35 
  -4   7   6    6.29    0.36 
   3  -7  -6   35.42    1.36 
   3  -7  -6   34.32    1.19 
  -3   7   6   34.56    1.23 
   2  -7  -6    5.85    0.33 
   2  -7  -6    5.77    0.39 
  -2   7   6    5.63    0.32 
   1  -7  -6    3.46    0.24 
   1  -7  -6    3.64    0.28 
  -1   7   6    3.83    0.24 
  -1   7   6    3.74    0.38 
   0  -7  -6    3.50    0.24 
   0  -7  -6    3.37    0.26 
   0  -7  -6    3.71    0.24 
   0   7   6    3.55    0.23 
   0   7   6    3.40    0.37 
  -1  -7  -6    1.50    0.16 
  -1  -7  -6    1.18    0.15 
  -1  -7  -6    1.46    0.18 
   1   7   6    1.67    0.17 
   1   7   6    1.45    0.23 
  -2  -7  -6    3.60    0.25 
  -2  -7  -6    4.00    0.21 
  -2  -7  -6    3.38    0.23 
   2   7   6    3.42    0.28 
   2   7   6    3.66    0.22 
  -3  -7  -6    2.12    0.18 
  -3  -7  -6    2.27    0.14 
  -3  -7  -6    2.97    0.22 
   3   7   6    2.66    0.24 
   3   7   6    2.56    0.19 
  -4  -7  -6    0.19    0.09 
  -4  -7  -6    0.14    0.04 
  -4  -7  -6    0.09    0.08 
   4   7   6    0.18    0.08 
   4   7   6    0.17    0.09 
  -5  -7  -6    1.37    0.16 
  -5  -7  -6    1.17    0.15 
   5   7   6    1.38    0.19 
   5   7   6    1.42    0.16 
  -6  -7  -6    4.12    0.26 
   6   7   6    5.16    0.30 
   6   7   6    3.86    0.27 
  -7  -7  -6    1.10    0.15 
   7   7   6    1.16    0.17 
   7   7   6    0.79    0.15 
  -8  -7  -6    2.30    0.22 
   8   7   6    1.69    0.22 
  -9  -7  -6    2.22    0.23 
   6  -8  -6    3.49    0.35 
  -6   8   6    3.45    0.31 
   5  -8  -6    4.29    0.35 
  -5   8   6    5.60    0.36 
   4  -8  -6    2.04    0.25 
  -4   8   6    1.77    0.20 
   3  -8  -6    0.39    0.15 
   3  -8  -6    0.17    0.12 
  -3   8   6    0.12    0.10 
   2  -8  -6   15.93    0.66 
   2  -8  -6   17.58    0.75 
  -2   8   6   16.44    0.67 
   1  -8  -6   22.06    0.81 
  -1   8   6   22.18    1.01 
  -1   8   6   22.68    0.83 
   0  -8  -6   11.67    0.50 
   0  -8  -6   11.34    0.48 
   0  -8  -6   11.42    0.52 
   0   8   6   10.94    0.48 
   0   8   6   12.16    0.64 
  -1  -8  -6   10.23    0.46 
  -1  -8  -6   10.10    0.43 
  -1  -8  -6    9.59    0.41 
   1   8   6   10.23    0.55 
   1   8   6    9.35    0.43 
  -2  -8  -6    8.69    0.41 
  -2  -8  -6    8.84    0.34 
  -2  -8  -6    8.91    0.39 
   2   8   6    8.92    0.49 
   2   8   6    7.95    0.38 
  -3  -8  -6    5.96    0.32 
  -3  -8  -6    5.96    0.30 
   3   8   6    5.50    0.30 
   3   8   6    6.28    0.38 
  -4  -8  -6    6.89    0.34 
  -4  -8  -6    7.84    0.36 
   4   8   6    7.01    0.35 
   4   8   6    7.66    0.41 
  -5  -8  -6    2.91    0.21 
   5   8   6    3.24    0.23 
  -6  -8  -6   -0.04    0.07 
   6   8   6   -0.03    0.07 
  -7  -8  -6    9.60    0.42 
   7   8   6    9.35    0.47 
  -8  -8  -6    4.39    0.28 
   8   8   6    4.05    0.31 
   5  -9  -6    0.39    0.15 
  -5   9   6    0.44    0.13 
   4  -9  -6    1.12    0.20 
  -4   9   6    1.22    0.19 
   3  -9  -6    0.13    0.11 
  -3   9   6    0.19    0.09 
   2  -9  -6    2.47    0.25 
  -2   9   6    2.92    0.24 
   1  -9  -6   25.74    0.90 
  -1   9   6   24.37    0.92 
   0  -9  -6    2.03    0.24 
   0  -9  -6    1.70    0.19 
   0   9   6    2.04    0.20 
  -1  -9  -6   32.40    1.11 
  -1  -9  -6   36.96    1.18 
   1   9   6   32.81    1.17 
  -2  -9  -6    4.75    0.27 
  -2  -9  -6    4.89    0.29 
   2   9   6    4.65    0.27 
  -3  -9  -6    1.53    0.16 
   3   9   6    1.41    0.15 
  -4  -9  -6    4.90    0.27 
   4   9   6    5.09    0.29 
  -5  -9  -6    7.51    0.35 
   5   9   6    7.93    0.38 
  -6  -9  -6    8.88    0.38 
   6   9   6    8.44    0.42 
  -7  -9  -6    1.73    0.17 
   7   9   6    1.53    0.20 
  -8  -9  -6    1.38    0.16 
   8   9   6    1.16    0.19 
   4 -10  -6   -0.09    0.10 
  -4  10   6    0.11    0.11 
   3 -10  -6    3.48    0.33 
  -3  10   6    3.71    0.28 
   2 -10  -6   30.60    1.08 
  -2  10   6   29.66    1.10 
   1 -10  -6   30.83    1.07 
  -1  10   6   30.73    1.11 
   0 -10  -6    1.93    0.21 
   0  10   6    2.23    0.20 
  -1 -10  -6    0.53    0.12 
   1  10   6    0.42    0.11 
  -2 -10  -6    4.16    0.25 
   2  10   6    4.41    0.26 
  -3 -10  -6    6.65    0.32 
   3  10   6    6.79    0.34 
  -4 -10  -6    2.49    0.19 
   4  10   6    2.46    0.21 
  -5 -10  -6    1.61    0.16 
   5  10   6    1.46    0.18 
  -6 -10  -6    0.04    0.07 
   6  10   6    0.06    0.08 
  -7 -10  -6    4.91    0.25 
   7  10   6    4.59    0.32 
   3 -11  -6    1.26    0.21 
  -3  11   6    0.97    0.16 
   2 -11  -6    0.14    0.11 
  -2  11   6    0.25    0.11 
   1 -11  -6    2.68    0.26 
  -1  11   6    2.97    0.25 
   0 -11  -6    0.07    0.09 
   0  11   6    0.04    0.08 
  -1 -11  -6    0.42    0.11 
   1  11   6    0.48    0.12 
  -2 -11  -6    0.17    0.09 
   2  11   6    0.07    0.08 
  -3 -11  -6    3.16    0.21 
   3  11   6    3.20    0.23 
  -4 -11  -6   -0.02    0.06 
   4  11   6   -0.03    0.07 
  -5 -11  -6   -0.01    0.06 
   5  11   6    0.17    0.10 
   1 -12  -6    1.34    0.19 
  -1  12   6    1.33    0.20 
   0 -12  -6   30.67    1.05 
   0  12   6   29.90    1.11 
  -1 -12  -6    4.26    0.27 
   1  12   6    4.31    0.29 
  -2 -12  -6    3.20    0.22 
   2  12   6    3.13    0.24 
  -3 -12  -6    1.41    0.15 
   3  12   6    1.52    0.18 
   1   8  -7    1.92    0.22 
   0   8  -7    9.52    0.46 
  -1   8  -7    0.47    0.12 
  -2   8  -7    0.17    0.10 
   2  -8   7    0.14    0.10 
  -3   8  -7    0.79    0.16 
   3  -8   7    0.61    0.15 
  -4   8  -7    1.82    0.23 
   4  -8   7    1.52    0.22 
  -5   8  -7    1.31    0.20 
   5  -8   7    1.54    0.23 
   3   7  -7    1.21    0.20 
   2   7  -7   35.03    1.26 
   1   7  -7    0.03    0.09 
   0   7  -7   11.84    0.54 
  -1   7  -7   17.94    0.72 
  -2   7  -7    5.06    0.32 
   2  -7   7    5.24    0.31 
  -3   7  -7    5.47    0.34 
   3  -7   7    6.23    0.36 
  -4   7  -7    0.76    0.16 
   4  -7   7    0.51    0.14 
  -5   7  -7    0.02    0.10 
   5  -7   7   -0.04    0.11 
  -6   7  -7    0.39    0.14 
   6  -7   7    0.22    0.13 
  -7   7  -7    4.48    0.34 
   7  -7   7    4.24    0.40 
   4   6  -7    2.74    0.30 
   3   6  -7   -0.12    0.09 
   2   6  -7   10.10    0.50 
   1   6  -7    7.35    0.40 
   0   6  -7    1.05    0.17 
  -1   6  -7   11.41    0.49 
  -1   6  -7   10.16    0.49 
   1  -6   7   10.18    0.64 
  -2   6  -7    3.76    0.27 
  -2   6  -7    3.82    0.26 
   2  -6   7    4.03    0.27 
   2  -6   7    3.86    0.37 
  -3   6  -7    7.97    0.39 
  -3   6  -7    7.62    0.41 
   3  -6   7    7.94    0.41 
   3  -6   7    8.16    0.48 
  -4   6  -7    4.59    0.31 
   4  -6   7    4.75    0.32 
  -5   6  -7    0.20    0.12 
   5  -6   7    0.27    0.13 
  -6   6  -7    2.26    0.26 
   6  -6   7    2.06    0.26 
  -7   6  -7    5.44    0.37 
   7  -6   7    5.47    0.40 
  -8   6  -7   33.50    1.25 
   8  -6   7   32.07    1.27 
   4   5  -7    5.39    0.39 
   3   5  -7    0.97    0.19 
   2   5  -7    9.23    0.48 
   1   5  -7    4.46    0.30 
   0   5  -7   17.09    0.62 
   0   5  -7   16.90    0.69 
  -1   5  -7    6.00    0.31 
  -1   5  -7    5.61    0.34 
   1  -5   7    6.04    0.47 
   1  -5   7    5.93    0.32 
  -2   5  -7    3.13    0.23 
  -2   5  -7    3.11    0.24 
   2  -5   7    3.71    0.35 
   2  -5   7    2.83    0.23 
  -3   5  -7    2.45    0.22 
  -3   5  -7    2.17    0.22 
   3  -5   7    2.96    0.24 
   3  -5   7    3.04    0.32 
  -4   5  -7    0.38    0.11 
   4  -5   7    0.18    0.11 
   4  -5   7    0.26    0.12 
  -5   5  -7    2.12    0.23 
   5  -5   7    2.30    0.25 
  -6   5  -7   33.63    1.25 
   6  -5   7   34.69    1.24 
  -7   5  -7    1.03    0.19 
   7  -5   7    0.97    0.21 
  -8   5  -7    5.03    0.36 
   8  -5   7    4.79    0.40 
   5   4  -7    0.62    0.20 
   4   4  -7   -0.07    0.11 
   3   4  -7   12.65    0.62 
   2   4  -7    5.72    0.29 
   2   4  -7    5.61    0.37 
   1   4  -7    1.56    0.17 
   1   4  -7    1.91    0.18 
   1   4  -7    1.50    0.20 
   0   4  -7    0.93    0.13 
   0   4  -7    1.10    0.17 
   0   4  -7    1.06    0.14 
   0  -4   7    0.91    0.24 
  -1   4  -7    0.45    0.11 
  -1   4  -7    0.50    0.13 
  -1   4  -7    0.54    0.11 
   1  -4   7    0.69    0.21 
   1  -4   7    0.43    0.12 
  -2   4  -7    0.56    0.13 
  -2   4  -7    0.90    0.14 
  -2   4  -7    0.90    0.15 
   2  -4   7    0.62    0.13 
   2  -4   7    0.61    0.11 
   2  -4   7    0.51    0.17 
  -3   4  -7   19.57    0.75 
  -3   4  -7   18.15    0.70 
  -3   4  -7   18.95    0.75 
   3  -4   7   18.98    0.73 
   3  -4   7   19.20    0.72 
   3  -4   7   17.93    0.83 
  -4   4  -7    3.24    0.25 
  -4   4  -7    2.66    0.24 
   4  -4   7    3.17    0.26 
   4  -4   7    2.84    0.24 
   4  -4   7    2.83    0.27 
  -5   4  -7   20.24    0.83 
   5  -4   7   20.76    0.85 
   5  -4   7   20.94    0.83 
   5  -4   7   22.66    0.87 
  -6   4  -7    3.96    0.29 
   6  -4   7    3.68    0.32 
   6  -4   7    4.25    0.33 
   6  -4   7    4.05    0.27 
  -7   4  -7    6.20    0.38 
   7  -4   7    6.57    0.43 
  -8   4  -7    0.01    0.09 
   8  -4   7    0.04    0.13 
  -9   4  -7    1.66    0.22 
   9  -4   7    1.95    0.29 
   6   3  -7    2.04    0.34 
   5   3  -7    1.41    0.27 
   4   3  -7    0.47    0.17 
   3   3  -7    2.95    0.21 
   3   3  -7    2.94    0.31 
   2   3  -7    0.49    0.15 
   2   3  -7    0.45    0.09 
   2   3  -7    0.63    0.11 
   1   3  -7    2.89    0.20 
   1   3  -7    2.57    0.27 
   1   3  -7    3.13    0.21 
   0   3  -7   55.90    1.94 
   0   3  -7   57.57    1.78 
   0   3  -7   60.45    1.90 
   0  -3   7   57.68    1.83 
   0  -3   7   56.62    2.19 
  -1   3  -7   91.83    2.77 
  -1   3  -7   86.39    2.59 
  -1   3  -7   83.38    2.79 
   1  -3   7   83.89    2.61 
   1  -3   7   86.91    3.07 
   1  -3   7   84.12    2.71 
  -2   3  -7    5.72    0.31 
  -2   3  -7    4.98    0.31 
  -2   3  -7    5.04    0.30 
   2  -3   7    5.36    0.40 
   2  -3   7    5.40    0.28 
   2  -3   7    5.49    0.32 
  -3   3  -7   90.16    2.67 
  -3   3  -7   91.31    2.85 
  -3   3  -7   83.65    2.84 
   3  -3   7   89.39    2.69 
   3  -3   7   89.28    3.06 
   3  -3   7   84.62    2.82 
  -4   3  -7    3.28    0.25 
  -4   3  -7    3.33    0.26 
   4  -3   7    3.71    0.31 
   4  -3   7    3.50    0.26 
   4  -3   7    3.63    0.27 
  -5   3  -7    1.11    0.16 
  -5   3  -7    1.76    0.23 
   5  -3   7    1.43    0.20 
   5  -3   7    1.40    0.20 
  -6   3  -7    1.58    0.18 
   6  -3   7    1.55    0.22 
   6  -3   7    2.27    0.27 
  -7   3  -7    1.94    0.21 
   7  -3   7    1.79    0.25 
   7  -3   7    2.33    0.30 
  -8   3  -7   10.07    0.51 
   8  -3   7   10.00    0.55 
   8  -3   7   10.09    0.60 
  -9   3  -7    3.65    0.29 
   9  -3   7    3.74    0.40 
   6   2  -7    0.41    0.21 
   5   2  -7    3.82    0.43 
   4   2  -7    1.88    0.19 
   4   2  -7    1.53    0.25 
   3   2  -7   22.47    0.78 
   3   2  -7   20.20    0.91 
  -3  -2   7   22.77    0.80 
   2   2  -7   13.92    0.55 
   2   2  -7   13.56    0.53 
   2   2  -7   13.28    0.64 
  -2  -2   7   13.87    0.49 
  -2  -2   7   13.13    0.53 
   1   2  -7    0.07    0.08 
   1   2  -7   -0.03    0.05 
   1   2  -7   -0.07    0.09 
  -1  -2   7    0.02    0.05 
  -1  -2   7   -0.01    0.17 
   0   2  -7    0.23    0.09 
   0   2  -7    0.07    0.06 
   0   2  -7    0.24    0.11 
   0  -2   7    0.07    0.15 
  -1   2  -7   22.16    0.85 
  -1   2  -7   22.19    0.79 
  -1   2  -7   22.55    0.82 
   1  -2   7   22.07    0.99 
   1  -2   7   22.22    0.80 
  -2   2  -7    4.21    0.25 
  -2   2  -7    3.82    0.25 
  -2   2  -7    3.55    0.26 
   2  -2   7    3.79    0.26 
   2  -2   7    3.64    0.34 
  -3   2  -7   14.85    0.62 
  -3   2  -7   15.02    0.61 
  -3   2  -7   14.79    0.59 
   3  -2   7   13.53    0.60 
   3  -2   7   18.46    0.75 
   3  -2   7   14.64    0.60 
  -4   2  -7    3.46    0.25 
  -4   2  -7    3.38    0.25 
   4  -2   7    3.52    0.27 
   4  -2   7    3.75    0.26 
  -5   2  -7    2.46    0.22 
   5  -2   7    2.83    0.28 
   5  -2   7    2.22    0.24 
  -6   2  -7   24.02    0.90 
   6  -2   7   22.51    0.90 
   6  -2   7   23.43    0.94 
  -7   2  -7    2.43    0.24 
   7  -2   7    2.51    0.31 
   7  -2   7    1.94    0.25 
  -8   2  -7    1.35    0.19 
   8  -2   7    1.16    0.22 
   8  -2   7    1.73    0.29 
  -9   2  -7    2.44    0.25 
   9  -2   7    2.07    0.30 
   9  -2   7    3.02    0.39 
  10  -2   7    3.34    0.39 
  10  -2   7    3.40    0.45 
   6   1  -7    2.14    0.35 
   5   1  -7    2.35    0.23 
   5   1  -7    2.63    0.35 
   4   1  -7    5.11    0.30 
   4   1  -7    4.38    0.40 
   3   1  -7    1.17    0.16 
   3   1  -7    1.31    0.16 
   3   1  -7    1.54    0.25 
  -3  -1   7    0.98    0.12 
  -3  -1   7    1.12    0.17 
   2   1  -7    0.05    0.05 
   2   1  -7    0.12    0.11 
   2   1  -7    0.05    0.07 
  -2  -1   7    0.02    0.05 
  -2  -1   7    0.07    0.08 
   1   1  -7   18.95    0.70 
   1   1  -7   18.70    0.68 
   1   1  -7   18.53    0.78 
  -1  -1   7   19.11    0.69 
  -1  -1   7   19.05    0.68 
  -1  -1   7   18.28    0.93 
   0   1  -7   24.26    0.84 
   0   1  -7   25.39    0.87 
   0   1  -7   22.80    0.92 
   0  -1   7   24.94    0.86 
   0  -1   7   23.92    1.08 
  -1   1  -7    6.53    0.31 
  -1   1  -7    6.14    0.31 
  -1   1  -7    6.00    0.35 
   1  -1   7    5.80    0.29 
   1  -1   7    5.31    0.42 
  -2   1  -7   26.99    0.95 
  -2   1  -7   27.09    0.98 
  -2   1  -7   26.70    0.91 
   2  -1   7   26.06    0.94 
   2  -1   7   25.42    0.92 
  -3   1  -7    8.11    0.40 
  -3   1  -7    8.43    0.39 
  -3   1  -7    8.14    0.38 
   3  -1   7    7.38    0.39 
  -4   1  -7   37.08    1.28 
  -4   1  -7   36.05    1.29 
   4  -1   7   36.31    1.24 
   4  -1   7   37.45    1.29 
  -5   1  -7   37.29    1.32 
   5  -1   7   37.67    1.34 
   5  -1   7   38.16    1.29 
  -6   1  -7    3.36    0.25 
   6  -1   7    3.60    0.29 
   6  -1   7    3.72    0.30 
  -7   1  -7    3.19    0.25 
   7  -1   7    3.28    0.32 
   7  -1   7    2.75    0.30 
  -8   1  -7    5.97    0.35 
   8  -1   7    5.82    0.41 
   8  -1   7    5.65    0.43 
  -9   1  -7   17.16    0.71 
   9  -1   7   16.35    0.83 
   9  -1   7   17.36    0.78 
  10  -1   7    0.58    0.21 
  10  -1   7    0.66    0.22 
   6   0  -7   18.08    0.95 
   6   0  -7   18.53    0.74 
   5   0  -7    0.71    0.23 
   5   0  -7    0.41    0.12 
   4   0  -7    6.32    0.34 
   4   0  -7    5.84    0.46 
  -4   0   7    6.68    0.37 
   3   0  -7    0.04    0.08 
   3   0  -7    0.09    0.07 
   3   0  -7    0.32    0.16 
  -3   0   7    0.14    0.09 
  -3   0   7    0.13    0.07 
   2   0  -7    0.77    0.14 
   2   0  -7    0.84    0.19 
   2   0  -7    0.68    0.11 
  -2   0   7    0.70    0.14 
  -2   0   7    0.93    0.12 
   1   0  -7    5.39    0.37 
   1   0  -7    6.04    0.29 
   1   0  -7    5.69    0.30 
  -1   0   7    5.84    0.31 
  -1   0   7    6.26    0.46 
  -1   0   7    5.26    0.27 
   0   0  -7    0.06    0.09 
   0   0  -7   -0.01    0.05 
   0   0  -7    0.04    0.08 
   0   0   7    0.04    0.12 
   0   0   7    0.08    0.06 
   0   0   7    0.05    0.07 
  -1   0  -7    3.23    0.20 
  -1   0  -7    2.74    0.24 
  -1   0  -7    2.90    0.21 
   1   0   7    3.04    0.20 
  -2   0  -7   15.19    0.58 
  -2   0  -7   14.88    0.58 
  -2   0  -7   15.22    0.62 
   2   0   7   14.14    0.59 
   2   0   7   14.58    0.58 
  -3   0  -7    3.10    0.21 
  -3   0  -7    2.83    0.22 
  -3   0  -7    3.28    0.23 
   3   0   7    3.20    0.24 
   3   0   7    2.90    0.22 
  -4   0  -7   25.67    0.91 
  -4   0  -7   23.23    0.85 
   4   0   7   24.31    0.88 
   4   0   7   23.88    0.90 
  -5   0  -7   -0.01    0.05 
   5   0   7    0.00    0.08 
  -6   0  -7   22.25    0.84 
   6   0   7   21.17    0.87 
   6   0   7   22.51    0.85 
  -7   0  -7    4.68    0.29 
   7   0   7    5.23    0.36 
   7   0   7    4.24    0.34 
  -8   0  -7   17.37    0.69 
   8   0   7   17.07    0.74 
   8   0   7   15.80    0.77 
   9   0   7    1.40    0.24 
   9   0   7    1.98    0.31 
  10   0   7   -0.12    0.14 
  10   0   7    0.22    0.16 
   7  -1  -7    1.30    0.32 
   6  -1  -7   14.96    0.85 
   6  -1  -7   15.03    0.65 
   5  -1  -7    4.41    0.47 
   5  -1  -7    5.36    0.33 
   4  -1  -7    4.50    0.41 
   4  -1  -7    4.22    0.28 
   3  -1  -7    8.25    0.40 
   3  -1  -7    8.48    0.39 
   3  -1  -7    8.42    0.52 
  -3   1   7    8.49    0.42 
  -3   1   7    8.85    0.39 
   2  -1  -7    0.76    0.11 
   2  -1  -7    1.08    0.16 
   2  -1  -7    0.64    0.16 
  -2   1   7    0.77    0.12 
  -2   1   7    0.80    0.14 
  -2   1   7    0.73    0.21 
   1  -1  -7    0.76    0.17 
   1  -1  -7    0.47    0.11 
   1  -1  -7    0.63    0.10 
  -1   1   7    0.38    0.19 
  -1   1   7    0.52    0.10 
  -1   1   7    0.71    0.13 
   0  -1  -7    0.10    0.08 
   0  -1  -7    0.29    0.08 
   0  -1  -7    0.18    0.11 
   0   1   7    0.09    0.07 
   0   1   7    0.14    0.07 
  -1  -1  -7   83.23    2.50 
  -1  -1  -7   75.81    2.54 
  -1  -1  -7   75.12    2.36 
   1   1   7   74.82    2.49 
   1   1   7   79.78    2.36 
  -2  -1  -7  103.03    3.02 
  -2  -1  -7   99.30    3.19 
  -2  -1  -7  102.28    3.23 
   2   1   7  100.63    3.20 
   2   1   7   98.98    3.03 
  -3  -1  -7   21.68    0.84 
  -3  -1  -7   22.61    0.81 
   3   1   7   22.94    0.84 
   3   1   7   23.04    0.82 
  -4  -1  -7   44.79    1.55 
  -4  -1  -7   46.26    1.47 
   4   1   7   45.99    1.49 
   4   1   7   45.66    1.55 
  -5  -1  -7   12.45    0.54 
   5   1   7   12.92    0.57 
   5   1   7   13.60    0.58 
  -6  -1  -7    9.75    0.44 
   6   1   7    8.87    0.46 
  -7  -1  -7    1.15    0.17 
   7   1   7    1.07    0.21 
   7   1   7    1.24    0.20 
  -8  -1  -7   20.93    0.82 
   8   1   7   21.67    0.87 
   8   1   7   21.91    0.92 
   9   1   7    1.16    0.22 
   9   1   7    0.58    0.18 
  10   1   7    6.37    0.51 
  10   1   7    6.55    0.46 
   7  -2  -7   -0.22    0.18 
   7  -2  -7    0.23    0.14 
   6  -2  -7    5.19    0.35 
   6  -2  -7    3.68    0.45 
   5  -2  -7    0.05    0.18 
   5  -2  -7    0.11    0.10 
   4  -2  -7   -0.15    0.13 
   4  -2  -7    0.05    0.09 
  -4   2   7   -0.05    0.06 
   3  -2  -7   22.29    0.98 
   3  -2  -7   22.36    0.82 
   3  -2  -7   22.47    0.83 
  -3   2   7   22.47    0.83 
   2  -2  -7    0.48    0.09 
   2  -2  -7    0.61    0.13 
   2  -2  -7    0.87    0.20 
  -2   2   7    0.75    0.13 
  -2   2   7    0.68    0.13 
  -2   2   7    0.76    0.22 
   1  -2  -7   18.51    0.79 
   1  -2  -7   18.54    0.69 
   1  -2  -7   17.93    0.68 
  -1   2   7   19.34    0.70 
  -1   2   7   18.53    0.70 
  -1   2   7   17.95    0.90 
   0  -2  -7    7.32    0.35 
   0  -2  -7    7.06    0.33 
   0  -2  -7    6.96    0.39 
   0   2   7    7.64    0.36 
   0   2   7    6.55    0.33 
  -1  -2  -7   80.55    2.43 
  -1  -2  -7   76.20    2.46 
  -1  -2  -7   75.47    2.52 
  -1  -2  -7   75.51    2.34 
   1   2   7   76.47    2.47 
   1   2   7   78.72    2.35 
  -2  -2  -7   24.35    0.85 
  -2  -2  -7   23.37    0.83 
  -2  -2  -7   24.03    0.89 
   2   2   7   23.20    0.85 
   2   2   7   23.17    0.85 
  -3  -2  -7    0.10    0.08 
  -3  -2  -7    0.20    0.09 
  -3  -2  -7    0.00    0.07 
   3   2   7   -0.02    0.06 
   3   2   7    0.17    0.10 
  -4  -2  -7    6.09    0.32 
  -4  -2  -7    5.83    0.31 
   4   2   7    5.67    0.33 
   4   2   7    5.39    0.35 
   4   2   7    5.88    0.33 
  -5  -2  -7    0.67    0.14 
  -5  -2  -7    1.03    0.15 
   5   2   7    0.68    0.14 
   5   2   7    0.62    0.13 
  -6  -2  -7   28.57    1.03 
   6   2   7   29.40    1.09 
   6   2   7   28.97    1.05 
  -7  -2  -7   20.63    0.79 
   7   2   7   21.64    0.84 
  -8  -2  -7    4.36    0.27 
   8   2   7    5.29    0.36 
   8   2   7    4.64    0.36 
   9   2   7    2.01    0.26 
   9   2   7    2.58    0.30 
  10   2   7   -0.05    0.12 
  10   2   7   -0.14    0.14 
   7  -3  -7    1.64    0.37 
   7  -3  -7    2.22    0.28 
   6  -3  -7    4.60    0.51 
   6  -3  -7    4.83    0.34 
   5  -3  -7    0.02    0.10 
   5  -3  -7    0.03    0.17 
   4  -3  -7   12.90    0.55 
   4  -3  -7   11.44    0.69 
  -4   3   7   12.40    0.54 
   3  -3  -7    7.97    0.40 
   3  -3  -7    8.59    0.53 
  -3   3   7    7.47    0.38 
   2  -3  -7    8.44    0.42 
   2  -3  -7    9.23    0.52 
  -2   3   7    8.26    0.58 
  -2   3   7    9.65    0.42 
   1  -3  -7   42.19    1.43 
   1  -3  -7   45.41    1.60 
  -1   3   7   46.12    1.50 
   0  -3  -7    0.23    0.09 
   0  -3  -7    0.18    0.11 
   0   3   7    0.23    0.07 
  -1  -3  -7    1.29    0.16 
  -1  -3  -7    1.53    0.19 
  -1  -3  -7    1.03    0.15 
   1   3   7    1.48    0.17 
   1   3   7    1.42    0.19 
  -2  -3  -7   18.74    0.71 
  -2  -3  -7   19.49    0.73 
  -2  -3  -7   19.81    0.75 
   2   3   7   18.98    0.72 
   2   3   7   19.04    0.79 
  -3  -3  -7   18.79    0.69 
  -3  -3  -7   17.91    0.70 
  -3  -3  -7   16.91    0.67 
   3   3   7   17.46    0.69 
   3   3   7   18.61    0.70 
   3   3   7   20.04    0.77 
  -4  -3  -7   45.69    1.48 
  -4  -3  -7   45.44    1.53 
  -4  -3  -7   44.30    1.46 
   4   3   7   45.48    1.55 
   4   3   7   47.39    1.49 
  -5  -3  -7    0.25    0.08 
  -5  -3  -7    0.28    0.10 
  -5  -3  -7    0.19    0.09 
   5   3   7    0.18    0.10 
   5   3   7    0.45    0.13 
   5   3   7    0.43    0.13 
  -6  -3  -7   47.23    1.53 
  -6  -3  -7   46.15    1.58 
   6   3   7   46.02    1.56 
   6   3   7   49.10    1.66 
   6   3   7   48.58    1.65 
  -7  -3  -7    0.10    0.06 
   7   3   7   -0.04    0.10 
   7   3   7    0.06    0.10 
   8   3   7    0.71    0.18 
   8   3   7    0.44    0.15 
   9   3   7    1.59    0.25 
   9   3   7    1.83    0.27 
  10   3   7   14.04    0.76 
  10   3   7   15.68    0.72 
   6  -4  -7    6.39    0.58 
   6  -4  -7    6.84    0.42 
   5  -4  -7    0.41    0.21 
   5  -4  -7    0.13    0.11 
   4  -4  -7   32.18    1.14 
   4  -4  -7   31.00    1.33 
  -4   4   7   33.36    1.16 
   3  -4  -7    8.81    0.43 
   3  -4  -7    8.53    0.54 
  -3   4   7    8.33    0.41 
   2  -4  -7   23.44    0.86 
   2  -4  -7   24.05    1.00 
  -2   4   7   24.17    0.88 
  -2   4   7   23.00    1.10 
   1  -4  -7   29.41    1.12 
   1  -4  -7   28.99    1.00 
  -1   4   7   28.51    1.02 
   0  -4  -7    0.09    0.08 
   0  -4  -7    0.01    0.08 
   0   4   7    0.07    0.07 
  -1  -4  -7    0.89    0.15 
  -1  -4  -7    0.91    0.15 
  -1  -4  -7    0.62    0.12 
   1   4   7    1.02    0.14 
   1   4   7    0.72    0.16 
  -2  -4  -7    4.60    0.28 
  -2  -4  -7    4.40    0.28 
  -2  -4  -7    4.78    0.28 
   2   4   7    4.65    0.33 
   2   4   7    4.44    0.26 
  -3  -4  -7   13.61    0.55 
  -3  -4  -7   13.25    0.54 
  -3  -4  -7   12.67    0.53 
   3   4   7   13.49    0.60 
   3   4   7   12.51    0.54 
   3   4   7   13.78    0.56 
  -4  -4  -7   27.92    0.97 
  -4  -4  -7   27.55    1.00 
  -4  -4  -7   29.20    0.99 
   4   4   7   27.82    1.01 
   4   4   7   27.24    0.99 
   4   4   7   30.21    1.08 
  -5  -4  -7    2.79    0.23 
  -5  -4  -7    2.68    0.19 
  -5  -4  -7    2.70    0.22 
   5   4   7    2.34    0.22 
   5   4   7    2.72    0.24 
   5   4   7    2.83    0.27 
  -6  -4  -7    0.06    0.08 
  -6  -4  -7    0.09    0.06 
  -6  -4  -7    0.14    0.09 
   6   4   7    0.15    0.10 
   6   4   7   -0.01    0.09 
   6   4   7    0.13    0.10 
  -7  -4  -7    0.68    0.11 
  -7  -4  -7    0.53    0.13 
   7   4   7    0.55    0.15 
   7   4   7    0.51    0.14 
   8   4   7    0.01    0.11 
   9   4   7    5.59    0.40 
   9   4   7    6.54    0.44 
  10   4   7    1.08    0.24 
   6  -5  -7   28.54    1.07 
   6  -5  -7   27.19    1.29 
   5  -5  -7    3.45    0.41 
   5  -5  -7    3.53    0.29 
  -5   5   7    3.94    0.28 
   4  -5  -7    4.32    0.32 
   4  -5  -7    4.86    0.48 
  -4   5   7    4.81    0.30 
   3  -5  -7    5.77    0.34 
   3  -5  -7    5.50    0.43 
  -3   5   7    5.27    0.31 
   2  -5  -7    5.32    0.33 
   2  -5  -7    5.59    0.41 
  -2   5   7    5.12    0.30 
   1  -5  -7    3.67    0.26 
   1  -5  -7    3.65    0.31 
  -1   5   7    3.45    0.23 
   0  -5  -7   14.81    0.59 
   0  -5  -7   15.74    0.66 
   0   5   7   14.50    0.59 
  -1  -5  -7   70.61    2.18 
  -1  -5  -7   73.73    2.22 
  -1  -5  -7   69.93    2.34 
   1   5   7   68.95    2.30 
   1   5   7   72.52    2.43 
  -2  -5  -7   59.41    1.84 
  -2  -5  -7   57.62    1.92 
  -2  -5  -7   54.90    1.81 
   2   5   7   56.94    1.91 
   2   5   7   62.00    2.02 
  -3  -5  -7    4.23    0.28 
  -3  -5  -7    4.16    0.26 
  -3  -5  -7    4.25    0.25 
   3   5   7    4.70    0.32 
   3   5   7    4.44    0.27 
  -4  -5  -7   13.01    0.56 
  -4  -5  -7   14.76    0.59 
  -4  -5  -7   14.67    0.56 
   4   5   7   14.46    0.59 
   4   5   7   14.23    0.59 
   4   5   7   14.83    0.64 
  -5  -5  -7    3.86    0.22 
  -5  -5  -7    3.71    0.26 
  -5  -5  -7    4.06    0.27 
   5   5   7    4.47    0.31 
   5   5   7    3.55    0.26 
   5   5   7    3.47    0.27 
  -6  -5  -7    1.90    0.21 
  -6  -5  -7    1.92    0.15 
  -6  -5  -7    2.09    0.22 
   6   5   7    1.80    0.22 
   6   5   7    1.78    0.22 
   6   5   7    1.54    0.20 
  -7  -5  -7    6.63    0.37 
  -7  -5  -7    7.06    0.38 
   7   5   7    6.77    0.40 
   7   5   7    6.23    0.38 
  -8  -5  -7   15.72    0.64 
   8   5   7   15.09    0.69 
   8   5   7   14.95    0.67 
  -9  -5  -7    1.00    0.18 
   9   5   7    0.97    0.20 
   9   5   7    0.68    0.17 
  10   5   7    0.88    0.22 
   6  -6  -7    3.25    0.43 
   6  -6  -7    3.53    0.34 
   5  -6  -7    3.40    0.32 
   5  -6  -7    2.74    0.37 
  -5   6   7    3.00    0.26 
   4  -6  -7    2.69    0.27 
   4  -6  -7    2.49    0.35 
  -4   6   7    3.27    0.26 
   3  -6  -7   -0.23    0.07 
   3  -6  -7   -0.03    0.12 
  -3   6   7    0.03    0.07 
   2  -6  -7    0.15    0.13 
   2  -6  -7    0.08    0.10 
  -2   6   7    0.09    0.08 
   1  -6  -7    1.19    0.17 
   1  -6  -7    0.72    0.16 
  -1   6   7    0.90    0.15 
   0  -6  -7    0.81    0.15 
   0  -6  -7    1.20    0.19 
   0   6   7    0.92    0.14 
   0   6   7    1.19    0.23 
  -1  -6  -7    1.33    0.17 
  -1  -6  -7    1.37    0.17 
  -1  -6  -7    1.10    0.17 
   1   6   7    1.52    0.24 
   1   6   7    1.06    0.14 
  -2  -6  -7    0.25    0.10 
  -2  -6  -7    0.41    0.10 
  -2  -6  -7    0.31    0.11 
   2   6   7    0.60    0.16 
   2   6   7    0.29    0.09 
  -3  -6  -7    2.50    0.24 
  -3  -6  -7    2.00    0.21 
   3   6   7    2.30    0.19 
   3   6   7    2.85    0.30 
  -4  -6  -7   11.38    0.49 
  -4  -6  -7   11.28    0.46 
  -4  -6  -7   12.15    0.51 
   4   6   7   12.12    0.56 
   4   6   7   10.75    0.49 
  -5  -6  -7    0.33    0.07 
  -5  -6  -7    0.33    0.11 
  -5  -6  -7    0.18    0.09 
   5   6   7    0.36    0.12 
   5   6   7    0.34    0.10 
   5   6   7    0.52    0.13 
  -6  -6  -7    7.59    0.39 
  -6  -6  -7    7.75    0.39 
   6   6   7    7.03    0.40 
   6   6   7    7.75    0.41 
  -7  -6  -7    1.13    0.17 
   7   6   7    0.96    0.17 
   7   6   7    1.41    0.20 
  -8  -6  -7    0.22    0.11 
   8   6   7    0.20    0.12 
   8   6   7   -0.03    0.10 
  -9  -6  -7    0.57    0.15 
   6  -7  -7    1.08    0.21 
   5  -7  -7    1.44    0.22 
   5  -7  -7    0.73    0.26 
  -5   7   7    1.19    0.20 
   4  -7  -7   10.64    0.53 
   4  -7  -7   11.22    0.66 
  -4   7   7   10.79    0.52 
   3  -7  -7   28.80    1.17 
   3  -7  -7   27.13    1.00 
  -3   7   7   26.95    1.03 
   2  -7  -7    6.94    0.39 
   2  -7  -7    7.18    0.46 
  -2   7   7    7.39    0.38 
   1  -7  -7    0.42    0.13 
   1  -7  -7    0.74    0.15 
  -1   7   7    0.47    0.12 
   0  -7  -7    5.09    0.32 
   0  -7  -7    4.76    0.30 
   0   7   7    4.88    0.41 
   0   7   7    4.78    0.29 
  -1  -7  -7   49.69    1.60 
  -1  -7  -7   49.04    1.55 
  -1  -7  -7   48.75    1.64 
   1   7   7   49.24    1.78 
   1   7   7   45.79    1.62 
  -2  -7  -7   16.68    0.64 
  -2  -7  -7   16.84    0.64 
  -2  -7  -7   16.21    0.66 
   2   7   7   16.52    0.76 
   2   7   7   16.07    0.65 
  -3  -7  -7    7.52    0.38 
  -3  -7  -7    6.94    0.32 
  -3  -7  -7    6.47    0.35 
   3   7   7    6.67    0.35 
   3   7   7    6.50    0.42 
  -4  -7  -7   11.36    0.44 
  -4  -7  -7   11.84    0.50 
  -4  -7  -7   12.37    0.52 
   4   7   7   10.86    0.50 
   4   7   7   12.42    0.58 
  -5  -7  -7    0.07    0.08 
  -5  -7  -7    0.02    0.08 
   5   7   7    0.01    0.07 
  -6  -7  -7   31.92    1.09 
   6   7   7   32.73    1.13 
   6   7   7   31.47    1.16 
  -7  -7  -7    0.77    0.14 
   7   7   7    0.50    0.13 
   7   7   7    0.75    0.15 
  -8  -7  -7    6.02    0.35 
   8   7   7    6.04    0.39 
  -9  -7  -7    0.16    0.11 
   5  -8  -7    6.76    0.44 
  -5   8   7    7.01    0.42 
   4  -8  -7    2.28    0.28 
  -4   8   7    1.55    0.19 
   3  -8  -7   30.10    1.09 
  -3   8   7   29.55    1.11 
   2  -8  -7    8.23    0.52 
   2  -8  -7    7.11    0.41 
  -2   8   7    7.77    0.41 
   1  -8  -7    1.70    0.22 
   1  -8  -7    1.60    0.20 
  -1   8   7    1.94    0.21 
   0  -8  -7   11.55    0.51 
   0   8   7   11.79    0.52 
  -1  -8  -7    0.41    0.11 
  -1  -8  -7    0.41    0.13 
  -1  -8  -7    0.58    0.12 
   1   8   7    0.51    0.11 
  -2  -8  -7   19.33    0.73 
  -2  -8  -7   20.18    0.73 
  -2  -8  -7   20.82    0.78 
   2   8   7   20.09    0.95 
   2   8   7   19.13    0.75 
  -3  -8  -7    7.26    0.38 
  -3  -8  -7    7.21    0.36 
   3   8   7    6.60    0.35 
  -4  -8  -7   -0.04    0.07 
  -4  -8  -7    0.07    0.09 
   4   8   7    0.08    0.08 
  -5  -8  -7    0.00    0.08 
   5   8   7    0.00    0.08 
  -6  -8  -7   33.15    1.13 
   6   8   7   34.23    1.21 
  -7  -8  -7    0.85    0.15 
   7   8   7    0.47    0.14 
  -8  -8  -7    3.81    0.28 
   8   8   7    3.41    0.31 
   4  -9  -7   31.23    1.16 
  -4   9   7   31.29    1.18 
   3  -9  -7    0.06    0.11 
  -3   9   7    0.20    0.10 
   2  -9  -7    0.19    0.10 
   1  -9  -7   18.46    0.73 
  -1   9   7   18.14    0.74 
   0  -9  -7    0.78    0.15 
   0   9   7    1.03    0.16 
  -1  -9  -7    9.06    0.43 
   1   9   7    9.21    0.43 
  -2  -9  -7    0.32    0.11 
   2   9   7    0.37    0.11 
  -3  -9  -7   18.66    0.69 
   3   9   7   17.71    0.71 
  -4  -9  -7   33.99    1.12 
   4   9   7   33.20    1.19 
  -5  -9  -7   15.30    0.59 
   5   9   7   14.84    0.63 
  -6  -9  -7    3.70    0.25 
   6   9   7    3.69    0.28 
  -7  -9  -7    0.14    0.09 
   7   9   7    0.09    0.10 
   3 -10  -7   14.98    0.68 
  -3  10   7   15.42    0.68 
   2 -10  -7    0.65    0.16 
  -2  10   7    0.76    0.16 
   1 -10  -7   18.34    0.73 
  -1  10   7   18.25    0.75 
   0 -10  -7    0.07    0.09 
   0  10   7    0.00    0.07 
  -1 -10  -7    7.30    0.37 
   1  10   7    6.76    0.37 
  -2 -10  -7    4.22    0.27 
   2  10   7    4.46    0.28 
  -3 -10  -7    1.05    0.15 
   3  10   7    0.97    0.15 
  -4 -10  -7    6.98    0.34 
   4  10   7    6.61    0.37 
  -5 -10  -7    0.29    0.10 
   5  10   7    0.16    0.10 
  -6 -10  -7    0.04    0.08 
   6  10   7    0.06    0.10 
   2 -11  -7    8.14    0.46 
  -2  11   7    8.51    0.46 
   1 -11  -7    0.89    0.17 
  -1  11   7    1.00    0.18 
   0 -11  -7    3.66    0.27 
   0  11   7    3.45    0.27 
  -1 -11  -7    1.32    0.18 
   1  11   7    1.17    0.18 
  -2 -11  -7    2.90    0.23 
   2  11   7    2.73    0.23 
  -3 -11  -7    4.22    0.26 
   3  11   7    3.88    0.27 
  -4 -11  -7   -0.02    0.07 
   4  11   7    0.03    0.08 
  -5 -11  -7    0.07    0.08 
   5  11   7   -0.05    0.08 
   0 -12  -7    4.17    0.30 
   0  12   7    3.49    0.29 
  -1 -12  -7    8.01    0.41 
   1  12   7    7.90    0.42 
  -2 -12  -7   -0.21    0.07 
   2  12   7    0.04    0.08 
  -3 -12  -7    3.50    0.24 
   3  12   7    3.14    0.26 
  -2   8  -8   -0.13    0.08 
   2  -8   8   -0.03    0.09 
  -3   8  -8    3.12    0.28 
   3  -8   8    3.27    0.28 
   1   7  -8    2.89    0.28 
   0   7  -8    2.88    0.28 
  -1   7  -8   17.98    0.75 
  -2   7  -8    0.12    0.11 
   2  -7   8    0.42    0.12 
  -3   7  -8    6.48    0.39 
   3  -7   8    6.78    0.39 
  -4   7  -8    4.48    0.33 
   4  -7   8    4.84    0.35 
  -5   7  -8   15.43    0.71 
   5  -7   8   16.32    0.72 
  -6   7  -8    6.48    0.42 
   6  -7   8    7.17    0.45 
   2   6  -8    0.60    0.15 
   1   6  -8   -0.01    0.10 
   0   6  -8    3.56    0.28 
  -1   6  -8    3.56    0.28 
  -2   6  -8    2.13    0.24 
   2  -6   8    1.72    0.21 
  -3   6  -8   16.57    0.72 
   3  -6   8   16.96    0.70 
  -4   6  -8   15.96    0.70 
  -4   6  -8   15.94    0.66 
   4  -6   8   16.04    0.69 
  -5   6  -8    2.65    0.29 
   5  -6   8    2.50    0.29 
  -6   6  -8    1.54    0.22 
   6  -6   8    1.40    0.23 
  -7   6  -8    1.53    0.23 
   7  -6   8    1.26    0.23 
   3   5  -8    0.71    0.19 
   2   5  -8    3.15    0.32 
   1   5  -8    1.77    0.23 
   0   5  -8    0.55    0.15 
  -1   5  -8    0.17    0.11 
  -1   5  -8    0.23    0.10 
  -2   5  -8    0.91    0.17 
  -2   5  -8    0.92    0.15 
   2  -5   8    0.58    0.21 
   2  -5   8    0.78    0.15 
  -3   5  -8    6.20    0.38 
  -3   5  -8    7.31    0.39 
   3  -5   8    7.15    0.48 
   3  -5   8    6.53    0.39 
  -4   5  -8    5.33    0.35 
  -4   5  -8    5.41    0.34 
   4  -5   8    5.15    0.35 
  -5   5  -8    3.29    0.28 
   5  -5   8    3.23    0.31 
  -6   5  -8    1.06    0.17 
   6  -5   8    1.14    0.21 
  -7   5  -8    2.09    0.24 
   7  -5   8    2.40    0.31 
  -8   5  -8    7.56    0.45 
   8  -5   8    6.82    0.48 
   4   4  -8   18.55    0.86 
   3   4  -8    4.61    0.38 
   2   4  -8   24.05    0.98 
   1   4  -8    7.68    0.37 
   1   4  -8    7.97    0.44 
   0   4  -8    9.19    0.42 
   0   4  -8    9.16    0.48 
  -1   4  -8    7.48    0.42 
  -1   4  -8    7.40    0.37 
   1  -4   8    7.59    0.55 
  -2   4  -8    1.47    0.21 
  -2   4  -8    1.17    0.17 
   2  -4   8    1.26    0.25 
   2  -4   8    1.03    0.17 
  -3   4  -8   48.91    1.78 
  -3   4  -8   53.96    1.69 
   3  -4   8   53.74    1.71 
   3  -4   8   52.33    1.96 
  -4   4  -8    0.03    0.08 
  -4   4  -8    0.12    0.09 
   4  -4   8    0.01    0.11 
   4  -4   8    0.10    0.12 
  -5   4  -8    5.60    0.35 
   5  -4   8    5.40    0.37 
   5  -4   8    5.32    0.38 
  -6   4  -8   31.98    1.20 
   6  -4   8   32.25    1.19 
  -7   4  -8   18.60    0.80 
   7  -4   8   19.35    0.83 
  -8   4  -8    7.72    0.45 
   8  -4   8    6.82    0.47 
   9  -4   8    2.58    0.34 
   5   3  -8    0.76    0.22 
   4   3  -8    8.72    0.55 
   3   3  -8    0.75    0.19 
   2   3  -8    4.17    0.34 
   2   3  -8    4.10    0.26 
   1   3  -8    0.08    0.11 
   1   3  -8    0.00    0.07 
   0   3  -8   15.05    0.58 
   0   3  -8   14.07    0.65 
  -1   3  -8    0.33    0.11 
  -1   3  -8    0.18    0.08 
  -1   3  -8    0.23    0.11 
   1  -3   8    0.29    0.19 
   1  -3   8    0.16    0.07 
  -2   3  -8    2.76    0.23 
  -2   3  -8    2.93    0.28 
  -2   3  -8    2.59    0.22 
   2  -3   8    2.57    0.26 
   2  -3   8    2.80    0.21 
   2  -3   8    3.51    0.39 
  -3   3  -8   14.42    0.64 
  -3   3  -8   14.89    0.62 
  -3   3  -8   16.18    0.65 
   3  -3   8   15.09    0.75 
   3  -3   8   14.62    0.61 
   3  -3   8   14.75    0.64 
  -4   3  -8  129.03    3.87 
  -4   3  -8  130.24    4.15 
   4  -3   8  126.36    3.90 
   4  -3   8  133.07    4.42 
   4  -3   8  129.88    4.13 
  -5   3  -8    6.73    0.40 
   5  -3   8    7.65    0.42 
   5  -3   8    7.53    0.46 
   5  -3   8    7.47    0.43 
  -6   3  -8    0.91    0.17 
   6  -3   8    0.86    0.19 
   6  -3   8    0.88    0.19 
  -7   3  -8   18.07    0.76 
   7  -3   8   17.23    0.78 
  -8   3  -8    0.11    0.10 
   8  -3   8    0.40    0.16 
  -9   3  -8    0.19    0.12 
   9  -3   8   -0.05    0.13 
   5   2  -8    1.82    0.31 
   4   2  -8   -0.07    0.13 
   3   2  -8    0.36    0.15 
   3   2  -8    0.30    0.11 
   2   2  -8    1.18    0.22 
   2   2  -8    1.37    0.18 
   1   2  -8    3.10    0.23 
   1   2  -8    3.01    0.31 
   0   2  -8    5.74    0.31 
   0   2  -8    5.46    0.31 
   0   2  -8    4.95    0.34 
  -1   2  -8    3.35    0.23 
  -1   2  -8    3.21    0.27 
  -1   2  -8    3.33    0.25 
   1  -2   8    2.96    0.37 
  -2   2  -8    2.18    0.22 
  -2   2  -8    1.80    0.21 
  -2   2  -8    1.73    0.20 
   2  -2   8    1.89    0.29 
   2  -2   8    1.22    0.15 
   2  -2   8    1.96    0.23 
  -3   2  -8    6.77    0.39 
  -3   2  -8    7.68    0.39 
  -3   2  -8    6.82    0.37 
   3  -2   8    8.08    0.50 
   3  -2   8    7.01    0.40 
   3  -2   8    7.18    0.37 
  -4   2  -8    9.08    0.45 
  -4   2  -8   10.21    0.48 
  -4   2  -8   10.02    0.49 
   4  -2   8   10.82    0.49 
   4  -2   8    9.74    0.49 
  -5   2  -8   42.92    1.52 
   5  -2   8   43.45    1.54 
   5  -2   8   44.17    1.49 
  -6   2  -8    2.48    0.27 
   6  -2   8    3.26    0.32 
   6  -2   8    2.30    0.28 
  -7   2  -8   11.92    0.57 
   7  -2   8   11.86    0.60 
   7  -2   8   12.53    0.63 
  -8   2  -8   29.04    1.11 
   8  -2   8   30.73    1.15 
   8  -2   8   27.72    1.19 
  -9   2  -8    1.08    0.19 
   9  -2   8    0.51    0.20 
   9  -2   8    0.85    0.21 
   5   1  -8    1.85    0.32 
   4   1  -8    8.02    0.54 
   4   1  -8    8.23    0.41 
   3   1  -8    0.43    0.16 
   3   1  -8    0.49    0.12 
   2   1  -8    7.80    0.49 
   2   1  -8    8.50    0.40 
  -2  -1   8    8.68    0.42 
   1   1  -8    8.45    0.48 
   1   1  -8    8.92    0.40 
   1   1  -8    8.39    0.40 
  -1  -1   8    7.75    0.39 
  -1  -1   8    7.98    0.37 
   0   1  -8   43.82    1.44 
   0   1  -8   47.36    1.52 
   0   1  -8   44.47    1.59 
   0  -1   8   43.41    1.49 
   0  -1   8   44.85    1.82 
  -1   1  -8    0.81    0.17 
  -1   1  -8    0.62    0.12 
  -1   1  -8    0.61    0.11 
   1  -1   8    0.75    0.22 
  -2   1  -8    1.76    0.19 
  -2   1  -8    2.56    0.20 
  -2   1  -8    2.27    0.25 
   2  -1   8    2.02    0.30 
   2  -1   8    2.15    0.19 
   2  -1   8    2.08    0.23 
  -3   1  -8    0.56    0.13 
  -3   1  -8    0.30    0.10 
  -3   1  -8    0.82    0.15 
   3  -1   8    0.34    0.13 
  -4   1  -8   -0.04    0.07 
  -4   1  -8    0.03    0.09 
   4  -1   8    0.15    0.09 
   4  -1   8   -0.09    0.08 
   5  -1   8    7.17    0.42 
   5  -1   8    6.79    0.40 
  -6   1  -8  130.07    4.17 
   6  -1   8  132.83    3.97 
   6  -1   8  128.52    4.20 
  -7   1  -8    0.87    0.15 
   7  -1   8    0.60    0.17 
   7  -1   8    0.52    0.17 
  -8   1  -8   18.51    0.77 
   8  -1   8   18.31    0.81 
   8  -1   8   19.18    0.87 
  -9   1  -8   17.95    0.75 
   9  -1   8   16.77    0.80 
   9  -1   8   17.52    0.86 
  10  -1   8    1.56    0.31 
  10  -1   8    0.81    0.21 
   6   0  -8    9.68    0.69 
   5   0  -8    1.76    0.22 
   5   0  -8    2.25    0.35 
   4   0  -8   30.52    1.27 
   4   0  -8   29.74    1.06 
   3   0  -8   15.19    0.62 
   3   0  -8   14.93    0.76 
  -3   0   8   15.59    0.64 
   2   0  -8   23.74    0.86 
   2   0  -8   23.29    0.99 
  -2   0   8   23.68    0.86 
  -2   0   8   24.37    0.88 
   1   0  -8   12.33    0.64 
   1   0  -8   14.42    0.57 
   1   0  -8   14.14    0.57 
  -1   0   8   13.44    0.57 
   0   0  -8   16.23    0.60 
   0   0  -8   14.01    0.65 
   0   0  -8   13.77    0.58 
   0   0   8   15.19    0.58 
   0   0   8   13.30    0.77 
   0   0   8   13.79    0.58 
  -1   0  -8    0.39    0.10 
  -1   0  -8    0.27    0.12 
  -1   0  -8    0.28    0.11 
   1   0   8    0.67    0.23 
   1   0   8    0.37    0.09 
  -2   0  -8    3.29    0.30 
  -2   0  -8    2.82    0.22 
  -2   0  -8    3.52    0.25 
   2   0   8    2.99    0.25 
   2   0   8    3.21    0.23 
  -3   0  -8    0.13    0.08 
  -3   0  -8    0.11    0.09 
  -3   0  -8    0.23    0.11 
   3   0   8    0.05    0.07 
   3   0   8    0.23    0.10 
  -4   0  -8    1.33    0.18 
  -4   0  -8    1.68    0.21 
   4   0   8    1.78    0.22 
   4   0   8    1.61    0.18 
  -5   0  -8    1.96    0.22 
  -5   0  -8    1.28    0.16 
   5   0   8    1.93    0.23 
  -6   0  -8   12.57    0.57 
   6   0   8   12.86    0.60 
   6   0   8   12.27    0.59 
  -7   0  -8    5.00    0.32 
   7   0   8    4.91    0.37 
   7   0   8    5.12    0.38 
  -8   0  -8    6.30    0.38 
   8   0   8    6.82    0.47 
   8   0   8    8.08    0.47 
   9   0   8   12.80    0.67 
   9   0   8   13.74    0.72 
  10   0   8    1.41    0.26 
  10   0   8    2.29    0.31 
   6  -1  -8    7.05    0.60 
   5  -1  -8    2.06    0.33 
   5  -1  -8    2.55    0.27 
   4  -1  -8   -0.05    0.14 
   4  -1  -8    0.01    0.10 
   3  -1  -8    0.00    0.14 
   3  -1  -8    0.03    0.09 
   2  -1  -8    0.14    0.13 
   2  -1  -8    0.38    0.12 
   2  -1  -8    0.24    0.09 
  -2   1   8    0.22    0.09 
   1  -1  -8    8.02    0.48 
   1  -1  -8    8.29    0.40 
   1  -1  -8    8.28    0.39 
  -1   1   8    8.06    0.38 
  -1   1   8    8.64    0.42 
   0  -1  -8    0.14    0.10 
   0  -1  -8    0.29    0.09 
   0  -1  -8    0.21    0.10 
   0   1   8    0.29    0.09 
   0   1   8    0.22    0.10 
   0   1   8    0.19    0.18 
  -1  -1  -8    5.42    0.35 
  -1  -1  -8    4.91    0.30 
  -1  -1  -8    5.55    0.29 
   1   1   8    5.64    0.31 
   1   1   8    5.12    0.29 
  -2  -1  -8    1.55    0.20 
  -2  -1  -8    1.12    0.16 
   2   1   8    1.04    0.17 
   2   1   8    1.09    0.16 
  -3  -1  -8    2.01    0.21 
  -3  -1  -8    2.56    0.25 
   3   1   8    2.45    0.21 
   3   1   8    2.20    0.23 
  -4  -1  -8   17.19    0.70 
  -4  -1  -8   17.63    0.72 
   4   1   8   18.97    0.73 
   4   1   8   17.78    0.72 
  -5  -1  -8    4.19    0.28 
  -5  -1  -8    3.92    0.28 
   5   1   8    3.95    0.30 
   5   1   8    4.41    0.31 
  -6  -1  -8   13.44    0.59 
   6   1   8   14.01    0.63 
  -7  -1  -8    7.08    0.37 
   7   1   8    5.95    0.41 
   7   1   8    6.21    0.42 
  -8  -1  -8    0.46    0.12 
   8   1   8    0.45    0.17 
   8   1   8    0.65    0.19 
   9   1   8    6.52    0.48 
   9   1   8    6.78    0.45 
  10   1   8    1.93    0.29 
  10   1   8    3.87    0.41 
   6  -2  -8    0.32    0.14 
   6  -2  -8    0.59    0.28 
   5  -2  -8    0.03    0.18 
   5  -2  -8    0.03    0.11 
   4  -2  -8   -0.09    0.09 
   4  -2  -8   -0.12    0.12 
   3  -2  -8   13.31    0.72 
   3  -2  -8   14.03    0.60 
  -3   2   8   14.19    0.59 
   2  -2  -8    7.84    0.49 
   2  -2  -8    7.42    0.39 
  -2   2   8    7.54    0.38 
   1  -2  -8    3.90    0.27 
   1  -2  -8    3.89    0.33 
  -1   2   8    4.14    0.26 
   0  -2  -8   13.10    0.62 
   0  -2  -8   13.87    0.56 
   0   2   8   12.71    0.55 
  -1  -2  -8   10.45    0.47 
  -1  -2  -8   10.52    0.52 
   1   2   8   10.99    0.47 
  -2  -2  -8    0.58    0.13 
  -2  -2  -8    0.60    0.13 
   2   2   8    0.55    0.11 
  -3  -2  -8    0.09    0.08 
  -3  -2  -8    0.17    0.09 
   3   2   8   -0.03    0.07 
   3   2   8    0.11    0.09 
  -4  -2  -8    3.02    0.24 
  -4  -2  -8    2.69    0.23 
   4   2   8    2.90    0.24 
   4   2   8    2.97    0.25 
  -5  -2  -8    8.14    0.41 
  -5  -2  -8    8.10    0.41 
   5   2   8    8.12    0.44 
   5   2   8    8.65    0.44 
  -6  -2  -8    0.26    0.10 
  -6  -2  -8    0.27    0.12 
   6   2   8    0.36    0.14 
   6   2   8    0.30    0.12 
  -7  -2  -8    6.04    0.34 
   7   2   8    6.48    0.40 
   8   2   8    1.21    0.22 
   8   2   8    1.13    0.21 
   9   2   8    0.47    0.18 
   9   2   8    0.36    0.17 
  10   2   8   11.65    0.68 
  10   2   8   10.67    0.61 
   6  -3  -8    0.90    0.29 
   6  -3  -8    1.03    0.20 
   5  -3  -8   -0.04    0.17 
   5  -3  -8    0.26    0.13 
   4  -3  -8    0.55    0.15 
   4  -3  -8    0.50    0.19 
   3  -3  -8   19.59    0.75 
   3  -3  -8   17.99    0.89 
  -3   3   8   19.02    0.75 
   2  -3  -8    0.84    0.15 
   2  -3  -8    0.78    0.19 
  -2   3   8    0.88    0.15 
   1  -3  -8    4.95    0.32 
   1  -3  -8    5.05    0.37 
  -1   3   8    5.36    0.31 
   0  -3  -8    5.40    0.37 
   0  -3  -8    5.49    0.32 
   0   3   8    5.82    0.32 
  -1  -3  -8    4.37    0.31 
  -1  -3  -8    4.21    0.28 
   1   3   8    4.15    0.27 
  -2  -3  -8    8.85    0.45 
  -2  -3  -8    8.77    0.42 
   2   3   8    8.78    0.42 
  -3  -3  -8    8.86    0.44 
  -3  -3  -8    9.11    0.43 
   3   3   8    9.38    0.46 
   3   3   8    8.50    0.42 
  -4  -3  -8    3.32    0.24 
  -4  -3  -8    2.76    0.23 
   4   3   8    3.24    0.27 
   4   3   8    3.13    0.24 
  -5  -3  -8    0.31    0.09 
  -5  -3  -8    0.56    0.13 
   5   3   8    0.44    0.14 
   5   3   8    0.36    0.11 
  -6  -3  -8   23.36    0.88 
  -6  -3  -8   22.45    0.87 
   6   3   8   23.98    0.93 
   6   3   8   24.12    0.91 
  -7  -3  -8    0.39    0.10 
  -7  -3  -8    0.44    0.13 
   7   3   8    0.33    0.15 
   7   3   8    0.31    0.13 
   8   3   8   10.08    0.54 
   9   3   8    5.80    0.42 
   9   3   8    5.79    0.44 
  10   3   8    7.64    0.53 
  10   3   8    7.18    0.49 
   6  -4  -8    0.34    0.23 
   6  -4  -8    0.39    0.16 
   5  -4  -8    0.23    0.13 
   5  -4  -8    0.05    0.18 
   4  -4  -8    0.03    0.11 
   4  -4  -8   -0.09    0.16 
  -4   4   8    0.10    0.10 
   3  -4  -8    4.16    0.43 
   3  -4  -8    3.35    0.28 
  -3   4   8    4.09    0.28 
   2  -4  -8    4.45    0.43 
   2  -4  -8    3.67    0.29 
  -2   4   8    4.03    0.27 
   1  -4  -8   75.75    2.58 
   1  -4  -8   75.82    2.35 
  -1   4   8   75.95    2.47 
   0  -4  -8  202.43    6.03 
   0  -4  -8  211.01    6.52 
   0   4   8  206.30    6.43 
  -1  -4  -8   -0.07    0.08 
  -1  -4  -8    0.11    0.09 
   1   4   8    0.24    0.09 
  -2  -4  -8   13.01    0.54 
  -2  -4  -8   11.52    0.55 
   2   4   8   12.70    0.54 
  -3  -4  -8    1.00    0.14 
  -3  -4  -8    1.02    0.17 
   3   4   8    0.84    0.13 
  -4  -4  -8    0.92    0.16 
  -4  -4  -8    1.32    0.17 
   4   4   8    1.04    0.17 
   4   4   8    1.40    0.20 
   4   4   8    0.77    0.13 
  -5  -4  -8    6.28    0.33 
  -5  -4  -8    6.22    0.36 
   5   4   8    5.89    0.35 
   5   4   8    5.86    0.37 
  -6  -4  -8    1.01    0.16 
  -6  -4  -8    1.43    0.16 
   6   4   8    1.56    0.21 
   6   4   8    1.77    0.25 
   6   4   8    1.24    0.18 
  -7  -4  -8    0.38    0.13 
   7   4   8    0.27    0.13 
   7   4   8    0.55    0.16 
  -8  -4  -8   20.17    0.81 
   8   4   8   20.39    0.85 
  -9  -4  -8   10.21    0.50 
   9   4   8    8.29    0.54 
   9   4   8    9.78    0.54 
  10   4   8   10.73    0.60 
  10   4   8   10.45    0.63 
   6  -5  -8    0.09    0.20 
   5  -5  -8    0.39    0.14 
   5  -5  -8    0.52    0.23 
   4  -5  -8    6.69    0.40 
   4  -5  -8    5.91    0.51 
  -4   5   8    6.56    0.38 
   3  -5  -8   24.46    0.91 
   3  -5  -8   23.24    1.05 
  -3   5   8   23.18    0.91 
   2  -5  -8   38.94    1.30 
   2  -5  -8   36.78    1.45 
  -2   5   8   37.29    1.33 
   1  -5  -8   13.15    0.56 
   1  -5  -8   11.76    0.62 
  -1   5   8   12.21    0.54 
   0  -5  -8    5.10    0.33 
   0  -5  -8    5.24    0.36 
   0   5   8    5.51    0.32 
  -1  -5  -8   58.17    2.03 
  -1  -5  -8   59.66    1.89 
   1   5   8   61.73    1.99 
  -2  -5  -8    2.25    0.24 
  -2  -5  -8    2.13    0.23 
   2   5   8    1.62    0.19 
  -3  -5  -8    7.60    0.39 
  -3  -5  -8    7.47    0.39 
   3   5   8    8.07    0.47 
   3   5   8    7.34    0.39 
  -4  -5  -8    1.27    0.18 
  -4  -5  -8    1.85    0.22 
  -4  -5  -8    1.78    0.19 
   4   5   8    0.92    0.16 
   4   5   8    1.56    0.21 
   4   5   8    1.71    0.20 
  -5  -5  -8    0.08    0.06 
  -5  -5  -8   -0.06    0.07 
   5   5   8    0.02    0.08 
   5   5   8    0.11    0.11 
   5   5   8    0.00    0.08 
  -6  -5  -8    6.75    0.38 
   6   5   8    6.52    0.39 
   6   5   8    7.14    0.41 
  -7  -5  -8    0.61    0.15 
   7   5   8    0.55    0.16 
   7   5   8    0.51    0.14 
  -8  -5  -8    3.46    0.32 
   8   5   8    3.87    0.33 
   8   5   8    4.31    0.35 
  -9  -5  -8   -0.14    0.09 
   9   5   8    0.05    0.12 
   5  -6  -8    3.51    0.34 
   5  -6  -8    3.68    0.44 
   4  -6  -8    0.11    0.11 
   4  -6  -8    0.16    0.16 
  -4   6   8    0.10    0.09 
   3  -6  -8    6.95    0.50 
   3  -6  -8    6.48    0.40 
  -3   6   8    7.50    0.40 
   2  -6  -8    1.28    0.21 
   2  -6  -8    1.57    0.22 
  -2   6   8    1.21    0.15 
   1  -6  -8    0.46    0.16 
   1  -6  -8    0.53    0.13 
  -1   6   8    0.36    0.11 
   0  -6  -8    6.15    0.39 
   0  -6  -8    6.19    0.36 
   0   6   8    6.06    0.34 
  -1  -6  -8   47.31    1.65 
  -1  -6  -8   48.03    1.55 
   1   6   8   47.23    1.61 
  -2  -6  -8   47.23    1.53 
  -2  -6  -8   47.70    1.61 
   2   6   8   44.75    1.59 
   2   6   8   48.25    1.73 
  -3  -6  -8    0.09    0.10 
  -3  -6  -8    0.09    0.09 
  -3  -6  -8    0.12    0.08 
   3   6   8    0.08    0.15 
   3   6   8    0.14    0.08 
  -4  -6  -8   18.22    0.71 
  -4  -6  -8   16.42    0.68 
   4   6   8   17.19    0.77 
   4   6   8   17.64    0.71 
  -5  -6  -8    0.35    0.09 
  -5  -6  -8    0.36    0.11 
  -5  -6  -8    0.39    0.12 
   5   6   8    0.52    0.12 
   5   6   8    0.55    0.15 
  -6  -6  -8    0.02    0.09 
  -6  -6  -8   -0.06    0.08 
   6   6   8    0.08    0.10 
   6   6   8   -0.09    0.09 
  -7  -6  -8    3.01    0.29 
   7   6   8    2.45    0.28 
   7   6   8    2.92    0.29 
  -8  -6  -8    7.05    0.41 
   8   6   8    7.13    0.45 
   8   6   8    7.09    0.44 
  -9  -6  -8    0.05    0.11 
   5  -7  -8    5.90    0.42 
   4  -7  -8   11.11    0.56 
   4  -7  -8   12.52    0.72 
  -4   7   8   10.55    0.54 
   3  -7  -8    1.37    0.21 
   3  -7  -8    1.74    0.29 
  -3   7   8    1.17    0.19 
   2  -7  -8   -0.05    0.12 
   2  -7  -8    0.10    0.12 
  -2   7   8    0.02    0.09 
   1  -7  -8   24.58    0.89 
   1  -7  -8   23.34    0.96 
  -1   7   8   21.78    0.88 
   0  -7  -8   48.61    1.60 
   0  -7  -8   50.06    1.73 
   0   7   8   48.65    1.67 
  -1  -7  -8    3.84    0.28 
  -1  -7  -8    3.98    0.29 
   1   7   8    3.98    0.27 
   1   7   8    4.15    0.46 
  -2  -7  -8    2.31    0.24 
  -2  -7  -8    2.47    0.21 
   2   7   8    1.94    0.26 
   2   7   8    1.80    0.19 
  -3  -7  -8    0.19    0.09 
  -3  -7  -8    0.47    0.14 
  -3  -7  -8    0.27    0.11 
   3   7   8    0.28    0.09 
  -4  -7  -8   14.23    0.59 
  -4  -7  -8   13.23    0.56 
   4   7   8   12.50    0.57 
  -5  -7  -8   13.24    0.56 
   5   7   8   12.62    0.58 
  -6  -7  -8    1.93    0.21 
   6   7   8    1.56    0.20 
   6   7   8    1.48    0.21 
  -7  -7  -8    0.22    0.11 
   7   7   8    0.26    0.13 
   7   7   8    0.63    0.16 
  -8  -7  -8    3.44    0.29 
   8   7   8    4.16    0.34 
  -9  -7  -8    7.63    0.43 
   4  -8  -8   -0.04    0.11 
  -4   8   8   -0.14    0.07 
   3  -8  -8    5.53    0.38 
  -3   8   8    6.00    0.38 
   2  -8  -8   11.86    0.57 
  -2   8   8   11.97    0.56 
   1  -8  -8    0.17    0.11 
  -1   8   8    0.06    0.09 
   0  -8  -8   26.94    0.97 
   0   8   8   26.18    0.99 
  -1  -8  -8    3.46    0.27 
   1   8   8    3.03    0.24 
  -2  -8  -8    9.59    0.46 
  -2  -8  -8   11.08    0.56 
   2   8   8    8.97    0.45 
  -3  -8  -8    0.61    0.14 
  -3  -8  -8    0.41    0.14 
   3   8   8    0.70    0.14 
  -4  -8  -8    1.33    0.18 
   4   8   8    1.35    0.19 
  -5  -8  -8    0.28    0.11 
   5   8   8    0.27    0.11 
  -6  -8  -8   -0.02    0.09 
   6   8   8   -0.05    0.09 
  -7  -8  -8    0.50    0.13 
   7   8   8    0.71    0.16 
  -8  -8  -8    0.08    0.11 
   8   8   8    0.09    0.13 
   4  -9  -8   -0.09    0.12 
  -4   9   8    0.03    0.10 
   3  -9  -8    0.83    0.19 
  -3   9   8    0.79    0.18 
   2  -9  -8   11.14    0.54 
  -2   9   8   10.76    0.54 
   1  -9  -8    2.68    0.27 
  -1   9   8    2.85    0.25 
   0  -9  -8   10.55    0.50 
   0   9   8   10.57    0.50 
  -1  -9  -8    3.99    0.29 
   1   9   8    3.76    0.27 
  -2  -9  -8    4.76    0.31 
   2   9   8    4.33    0.29 
  -3  -9  -8    1.15    0.17 
   3   9   8    0.96    0.16 
  -4  -9  -8    0.38    0.12 
   4   9   8    0.27    0.11 
  -5  -9  -8    8.75    0.43 
   5   9   8    8.49    0.45 
  -6  -9  -8    2.32    0.23 
   6   9   8    2.25    0.25 
  -7  -9  -8   10.29    0.48 
   7   9   8   10.28    0.53 
   3 -10  -8    0.37    0.16 
  -3  10   8    0.40    0.13 
   2 -10  -8    0.22    0.13 
  -2  10   8    0.29    0.13 
   1 -10  -8    5.75    0.37 
  -1  10   8    5.83    0.37 
   0 -10  -8    2.66    0.27 
   0  10   8    2.81    0.25 
  -1 -10  -8    5.68    0.34 
   1  10   8    5.36    0.34 
  -2 -10  -8    8.80    0.44 
   2  10   8    8.94    0.45 
  -3 -10  -8    3.24    0.25 
   3  10   8    3.00    0.26 
  -4 -10  -8    3.08    0.24 
   4  10   8    2.77    0.25 
  -5 -10  -8   -0.01    0.08 
   5  10   8    0.02    0.09 
  -6 -10  -8    0.59    0.13 
   6  10   8    0.47    0.14 
   1 -11  -8    1.88    0.24 
  -1  11   8    2.37    0.27 
   0 -11  -8    0.46    0.14 
   0  11   8    0.37    0.12 
  -1 -11  -8    8.27    0.43 
   1  11   8    8.43    0.45 
  -2 -11  -8    0.72    0.15 
   2  11   8    0.49    0.13 
  -3 -11  -8    7.22    0.38 
   3  11   8    7.49    0.41 
  -4 -11  -8    5.00    0.31 
   4  11   8    4.84    0.33 
  -3   7  -9    2.29    0.28 
   3  -7   9    2.17    0.25 
   0   6  -9    0.76    0.17 
  -1   6  -9    8.56    0.48 
  -2   6  -9    5.65    0.38 
  -3   6  -9   14.97    0.69 
   3  -6   9   14.93    0.66 
  -4   6  -9    2.49    0.28 
   4  -6   9    1.38    0.23 
  -5   6  -9    1.65    0.25 
   5  -6   9    1.28    0.23 
  -6   6  -9    0.92    0.17 
   6  -6   9    1.17    0.23 
   2   5  -9    6.62    0.44 
   1   5  -9    2.25    0.28 
   0   5  -9    5.16    0.36 
  -1   5  -9    0.22    0.12 
  -2   5  -9   17.96    0.78 
   2  -5   9   18.16    0.74 
  -3   5  -9   21.01    0.83 
  -3   5  -9   20.38    0.87 
   3  -5   9   21.92    0.85 
  -4   5  -9    4.18    0.33 
  -4   5  -9    4.57    0.33 
   4  -5   9    4.66    0.36 
  -5   5  -9    0.41    0.14 
  -5   5  -9    0.43    0.15 
   5  -5   9    0.39    0.16 
  -6   5  -9   20.80    0.89 
   6  -5   9   21.58    0.91 
  -7   5  -9    0.11    0.11 
   7  -5   9    0.14    0.14 
   3   4  -9    0.09    0.14 
   2   4  -9   -0.15    0.10 
   1   4  -9    6.44    0.42 
   0   4  -9   10.03    0.53 
  -1   4  -9    6.75    0.37 
  -1   4  -9    6.05    0.39 
  -2   4  -9   26.33    1.03 
  -2   4  -9   26.37    0.96 
   2  -4   9   26.11    0.98 
  -3   4  -9    0.81    0.16 
  -3   4  -9    0.39    0.12 
   3  -4   9    0.35    0.14 
   3  -4   9    0.50    0.21 
  -4   4  -9    0.41    0.14 
  -4   4  -9    0.37    0.13 
   4  -4   9    0.65    0.20 
   4  -4   9    0.48    0.16 
  -5   4  -9    5.58    0.37 
  -5   4  -9    5.38    0.37 
   5  -4   9    5.30    0.38 
  -6   4  -9    0.10    0.10 
   6  -4   9    0.22    0.14 
  -7   4  -9   18.84    0.81 
   7  -4   9   17.69    0.82 
  -8   4  -9    0.58    0.17 
   8  -4   9    0.47    0.19 
   3   3  -9    0.45    0.18 
   2   3  -9    1.13    0.23 
   1   3  -9    0.66    0.16 
   1   3  -9    0.42    0.13 
   0   3  -9    1.27    0.22 
   0   3  -9    1.36    0.18 
  -1   3  -9   -0.05    0.09 
  -1   3  -9   -0.08    0.08 
  -2   3  -9    1.87    0.22 
  -2   3  -9    1.74    0.24 
   2  -3   9    1.19    0.21 
  -3   3  -9    3.23    0.27 
  -3   3  -9    2.90    0.31 
   3  -3   9    3.39    0.41 
   3  -3   9    3.12    0.30 
  -4   3  -9    4.56    0.32 
  -4   3  -9    4.75    0.33 
   4  -3   9    4.09    0.38 
   4  -3   9    4.57    0.34 
  -5   3  -9    1.29    0.20 
  -5   3  -9    1.90    0.24 
   5  -3   9    1.66    0.27 
   5  -3   9    1.67    0.25 
  -6   3  -9    2.19    0.27 
   6  -3   9    1.62    0.25 
  -7   3  -9    5.24    0.36 
   7  -3   9    4.85    0.40 
  -8   3  -9    0.08    0.10 
   8  -3   9   -0.09    0.13 
   4   2  -9    1.46    0.29 
   3   2  -9    4.91    0.43 
   2   2  -9    1.83    0.21 
   2   2  -9    1.52    0.26 
   1   2  -9    2.52    0.31 
   1   2  -9    2.86    0.24 
   0   2  -9    1.65    0.20 
   0   2  -9    1.09    0.19 
  -1   2  -9    7.38    0.39 
  -1   2  -9    6.95    0.42 
  -2   2  -9    4.63    0.33 
  -2   2  -9    4.79    0.31 
   2  -2   9    4.10    0.31 
  -3   2  -9    7.77    0.44 
  -3   2  -9    8.74    0.44 
   3  -2   9    8.16    0.45 
   3  -2   9    7.94    0.56 
   3  -2   9    7.91    0.41 
  -4   2  -9    5.54    0.36 
  -4   2  -9    5.15    0.35 
   4  -2   9    7.55    0.50 
   4  -2   9    5.51    0.35 
   4  -2   9    4.99    0.36 
  -5   2  -9    0.60    0.15 
  -5   2  -9    0.62    0.15 
   5  -2   9    0.57    0.15 
   5  -2   9    0.54    0.17 
  -6   2  -9    8.45    0.46 
   6  -2   9    8.09    0.48 
   6  -2   9    7.18    0.45 
  -7   2  -9    4.57    0.34 
   7  -2   9    4.20    0.40 
   8  -2   9    0.43    0.18 
  -9   2  -9    2.15    0.26 
   9  -2   9    2.07    0.32 
   4   1  -9    4.22    0.46 
   3   1  -9   11.58    0.67 
   3   1  -9   12.68    0.55 
   2   1  -9    0.28    0.15 
   2   1  -9    0.36    0.12 
   1   1  -9   -0.14    0.10 
   1   1  -9    0.07    0.09 
   0   1  -9   -0.06    0.08 
   0   1  -9    0.18    0.12 
  -1   1  -9    2.28    0.23 
  -1   1  -9    2.23    0.28 
  -2   1  -9   11.46    0.52 
  -2   1  -9   12.13    0.53 
  -2   1  -9   11.39    0.57 
   2  -1   9   13.67    0.77 
   2  -1   9   11.06    0.54 
   2  -1   9   11.79    0.52 
  -3   1  -9   43.88    1.48 
  -3   1  -9   44.08    1.57 
   3  -1   9   45.25    1.51 
  -4   1  -9   31.89    1.19 
  -4   1  -9   30.09    1.12 
   4  -1   9   31.92    1.16 
   4  -1   9   33.07    1.17 
  -5   1  -9    2.40    0.25 
  -5   1  -9    2.93    0.30 
   5  -1   9    2.45    0.26 
   5  -1   9    2.79    0.30 
  -6   1  -9   14.29    0.62 
  -6   1  -9   13.13    0.63 
   6  -1   9   14.74    0.68 
   6  -1   9   14.50    0.67 
  -7   1  -9    0.55    0.16 
   7  -1   9    0.30    0.17 
   7  -1   9    0.59    0.17 
  -8   1  -9    0.33    0.13 
   8  -1   9    0.44    0.18 
   8  -1   9    0.39    0.17 
   9  -1   9    2.96    0.37 
   9  -1   9    3.24    0.36 
   5   0  -9    2.96    0.41 
   4   0  -9    0.70    0.22 
   4   0  -9    0.72    0.16 
   3   0  -9   12.17    0.68 
   3   0  -9   11.98    0.55 
   2   0  -9    2.09    0.24 
   2   0  -9    2.38    0.33 
   1   0  -9    0.70    0.18 
   1   0  -9    0.63    0.14 
   0   0  -9   18.77    0.74 
   0   0  -9   17.78    0.79 
   0   0  -9   16.86    0.70 
   0   0   9   17.66    0.70 
  -1   0  -9    1.63    0.17 
  -1   0  -9    1.70    0.20 
  -1   0  -9    1.63    0.24 
   1   0   9    1.21    0.16 
  -2   0  -9   38.21    1.29 
  -2   0  -9   37.85    1.39 
   2   0   9   38.15    1.33 
  -3   0  -9    2.63    0.27 
  -3   0  -9    2.36    0.25 
   3   0   9    2.37    0.24 
   3   0   9    2.42    0.27 
  -4   0  -9   13.72    0.61 
   4   0   9   14.59    0.63 
   4   0   9   14.59    0.65 
  -5   0  -9    1.01    0.19 
  -5   0  -9    1.13    0.19 
   5   0   9    0.84    0.18 
  -6   0  -9    4.55    0.32 
  -6   0  -9    5.05    0.35 
   6   0   9    5.09    0.36 
   6   0   9    4.80    0.37 
  -7   0  -9    2.02    0.24 
   7   0   9    1.63    0.25 
   7   0   9    1.65    0.26 
  -8   0  -9    1.61    0.22 
   8   0   9    1.69    0.27 
   8   0   9    0.74    0.19 
   9   0   9   11.76    0.63 
   9   0   9   10.57    0.65 
   5  -1  -9    1.75    0.24 
   5  -1  -9    1.64    0.32 
   4  -1  -9    1.51    0.22 
   4  -1  -9    1.36    0.29 
   3  -1  -9   12.90    0.56 
   3  -1  -9   10.78    0.67 
   2  -1  -9    2.45    0.33 
   2  -1  -9    3.18    0.29 
   1  -1  -9   13.60    0.69 
   1  -1  -9   14.98    0.61 
  -1   1   9   13.10    0.57 
   0  -1  -9   27.22    0.97 
   0  -1  -9   25.64    1.06 
   0   1   9   27.27    0.98 
  -1  -1  -9    6.59    0.42 
  -1  -1  -9    6.79    0.38 
   1   1   9    6.76    0.36 
  -2  -1  -9    7.04    0.38 
  -2  -1  -9    6.25    0.39 
   2   1   9    6.35    0.36 
  -3  -1  -9    1.21    0.19 
  -3  -1  -9    1.29    0.20 
   3   1   9    1.05    0.18 
   3   1   9    0.99    0.16 
  -4  -1  -9    0.29    0.12 
  -4  -1  -9    0.41    0.13 
   4   1   9    0.66    0.15 
   4   1   9    0.48    0.15 
  -5  -1  -9   19.27    0.78 
   5   1   9   19.56    0.81 
   5   1   9   20.12    0.82 
  -6  -1  -9   11.26    0.54 
  -6  -1  -9   10.85    0.53 
   6   1   9   10.74    0.56 
  -7  -1  -9   17.69    0.74 
  -7  -1  -9   17.15    0.73 
   7   1   9   17.41    0.79 
   7   1   9   18.09    0.79 
  -8  -1  -9    6.53    0.38 
   8   1   9    6.13    0.46 
   8   1   9    7.34    0.47 
   9   1   9    1.05    0.24 
   9   1   9    1.30    0.28 
   5  -2  -9   25.77    1.22 
   5  -2  -9   26.15    1.00 
   4  -2  -9    2.11    0.25 
   4  -2  -9    2.53    0.38 
   3  -2  -9   21.48    1.01 
   3  -2  -9   22.08    0.85 
   2  -2  -9    0.60    0.20 
   2  -2  -9    0.49    0.13 
  -2   2   9    0.34    0.11 
   1  -2  -9   39.64    1.48 
   1  -2  -9   39.41    1.32 
  -1   2   9   37.56    1.35 
   0  -2  -9   26.36    0.95 
   0  -2  -9   25.68    1.04 
   0   2   9   25.37    0.96 
  -1  -2  -9   -0.01    0.09 
  -1  -2  -9    0.17    0.11 
   1   2   9    0.06    0.07 
  -2  -2  -9    0.02    0.10 
  -2  -2  -9    0.04    0.09 
   2   2   9    0.15    0.10 
  -3  -2  -9    7.79    0.41 
  -3  -2  -9    8.09    0.44 
   3   2   9    7.98    0.44 
   3   2   9    7.33    0.40 
  -4  -2  -9   35.87    1.26 
  -4  -2  -9   36.09    1.31 
   4   2   9   37.36    1.29 
   4   2   9   36.57    1.31 
  -5  -2  -9    4.10    0.29 
  -5  -2  -9    3.72    0.29 
   5   2   9    3.88    0.30 
   5   2   9    3.95    0.31 
  -6  -2  -9    2.27    0.24 
  -6  -2  -9    1.89    0.23 
   6   2   9    1.85    0.26 
   6   2   9    2.38    0.28 
  -7  -2  -9    3.69    0.28 
  -7  -2  -9    3.92    0.30 
   7   2   9    4.22    0.39 
  -8  -2  -9    0.03    0.11 
   8   2   9    0.07    0.14 
   8   2   9    0.10    0.12 
   9   2   9    0.61    0.20 
   9   2   9    0.76    0.21 
   5  -3  -9    9.43    0.52 
   5  -3  -9    9.56    0.68 
   4  -3  -9    0.19    0.17 
   4  -3  -9    0.14    0.12 
   3  -3  -9   21.87    1.03 
   3  -3  -9   23.08    0.88 
   2  -3  -9    1.03    0.18 
   2  -3  -9    1.01    0.23 
  -2   3   9    1.03    0.16 
   1  -3  -9   14.01    0.61 
   1  -3  -9   13.76    0.70 
  -1   3   9   13.82    0.60 
   0  -3  -9    0.14    0.12 
   0  -3  -9    0.07    0.10 
   0   3   9    0.09    0.09 
  -1  -3  -9    3.29    0.29 
  -1  -3  -9    3.80    0.28 
   1   3   9    3.44    0.26 
  -2  -3  -9   17.74    0.76 
  -2  -3  -9   17.88    0.72 
   2   3   9   17.53    0.72 
  -3  -3  -9    0.49    0.15 
  -3  -3  -9    0.03    0.11 
   3   3   9    0.15    0.10 
  -4  -3  -9    9.33    0.46 
  -4  -3  -9    9.71    0.47 
   4   3   9    9.23    0.47 
   4   3   9    9.00    0.49 
  -5  -3  -9   19.65    0.78 
  -5  -3  -9   18.96    0.78 
   5   3   9   20.18    0.80 
   5   3   9   19.22    0.80 
  -6  -3  -9   29.05    1.10 
  -6  -3  -9   30.92    1.12 
   6   3   9   30.57    1.14 
   6   3   9   31.54    1.17 
  -7  -3  -9    7.77    0.41 
  -7  -3  -9    8.04    0.44 
   7   3   9    7.72    0.48 
   7   3   9    8.98    0.50 
  -8  -3  -9    2.45    0.28 
   8   3   9    1.99    0.27 
  -9  -3  -9    0.47    0.17 
   9   3   9    0.50    0.19 
   9   3   9    0.67    0.21 
   5  -4  -9    7.66    0.47 
   5  -4  -9    7.91    0.62 
   4  -4  -9    0.51    0.20 
   4  -4  -9    0.70    0.17 
   3  -4  -9   -0.10    0.10 
   3  -4  -9    0.15    0.15 
  -3   4   9    0.00    0.10 
   2  -4  -9    0.08    0.14 
   2  -4  -9    0.18    0.12 
  -2   4   9    0.07    0.09 
   1  -4  -9    6.05    0.38 
   1  -4  -9    6.33    0.44 
  -1   4   9    6.10    0.36 
   0  -4  -9    8.27    0.48 
   0  -4  -9    7.40    0.42 
   0   4   9    7.92    0.41 
  -1  -4  -9    6.41    0.40 
  -1  -4  -9    6.18    0.36 
   1   4   9    6.31    0.36 
  -2  -4  -9   27.66    1.08 
  -2  -4  -9   28.97    1.03 
   2   4   9   28.99    1.06 
  -3  -4  -9   49.60    1.75 
  -3  -4  -9   52.76    1.67 
   3   4   9   49.77    1.73 
  -4  -4  -9   30.46    1.12 
  -4  -4  -9   31.11    1.10 
   4   4   9   30.32    1.12 
   4   4   9   30.50    1.13 
  -5  -4  -9    0.15    0.09 
  -5  -4  -9    0.17    0.12 
   5   4   9    0.15    0.12 
   5   4   9    0.21    0.13 
  -6  -4  -9    2.49    0.26 
  -6  -4  -9    2.92    0.23 
   6   4   9    2.46    0.28 
   6   4   9    2.11    0.24 
  -7  -4  -9    2.85    0.29 
   7   4   9    3.10    0.33 
   7   4   9    2.42    0.30 
  -8  -4  -9    3.68    0.35 
   8   4   9    3.26    0.35 
  -9  -4  -9    3.44    0.34 
   9   4   9    3.43    0.35 
   9   4   9    3.96    0.39 
   5  -5  -9    0.15    0.12 
   5  -5  -9    0.29    0.21 
   4  -5  -9    2.29    0.28 
   4  -5  -9    1.85    0.32 
   3  -5  -9    0.55    0.22 
   3  -5  -9    0.50    0.16 
  -3   5   9    0.32    0.13 
   2  -5  -9    1.52    0.27 
   2  -5  -9    1.08    0.19 
  -2   5   9    1.13    0.18 
   1  -5  -9   12.11    0.63 
   1  -5  -9   11.42    0.54 
  -1   5   9   11.32    0.54 
   0  -5  -9   14.91    0.71 
   0  -5  -9   15.63    0.65 
   0   5   9   14.76    0.64 
  -1  -5  -9   21.64    0.84 
  -1  -5  -9   22.69    0.92 
   1   5   9   22.26    0.86 
  -2  -5  -9    6.96    0.40 
  -2  -5  -9    7.11    0.40 
   2   5   9    6.72    0.38 
  -3  -5  -9    5.51    0.34 
  -3  -5  -9    4.77    0.32 
   3   5   9    4.20    0.30 
  -4  -5  -9   15.44    0.66 
  -4  -5  -9   15.64    0.66 
   4   5   9   16.22    0.68 
  -5  -5  -9    1.17    0.18 
  -5  -5  -9    1.10    0.14 
   5   5   9    1.18    0.18 
   5   5   9    1.33    0.20 
  -6  -5  -9    0.31    0.13 
   6   5   9    0.35    0.15 
   6   5   9    0.30    0.13 
  -7  -5  -9   13.19    0.61 
   7   5   9   13.56    0.64 
   7   5   9   13.03    0.64 
  -8  -5  -9   17.94    0.75 
   8   5   9   17.34    0.77 
   8   5   9   16.24    0.78 
  -9  -5  -9    4.19    0.37 
   9   5   9    2.60    0.32 
   4  -6  -9    7.37    0.46 
   4  -6  -9    8.40    0.60 
   3  -6  -9   10.26    0.65 
   3  -6  -9   11.10    0.56 
  -3   6   9   10.97    0.54 
   2  -6  -9   11.98    0.66 
   2  -6  -9   11.72    0.57 
  -2   6   9   11.75    0.56 
   1  -6  -9   32.70    1.30 
   1  -6  -9   34.16    1.19 
  -1   6   9   32.14    1.20 
   0  -6  -9    2.08    0.25 
   0  -6  -9    1.46    0.23 
   0   6   9    2.01    0.23 
  -1  -6  -9   12.49    0.57 
  -1  -6  -9   12.49    0.60 
   1   6   9   12.63    0.57 
  -2  -6  -9    6.11    0.36 
  -2  -6  -9    6.24    0.37 
   2   6   9    5.66    0.35 
  -3  -6  -9   13.37    0.60 
  -3  -6  -9   13.62    0.60 
   3   6   9   14.01    0.61 
  -4  -6  -9    0.39    0.11 
  -4  -6  -9    0.32    0.12 
   4   6   9    0.33    0.11 
  -5  -6  -9   38.92    1.35 
   5   6   9   39.72    1.41 
  -6  -6  -9   10.19    0.51 
   6   6   9   10.93    0.55 
   6   6   9   10.69    0.54 
  -7  -6  -9   11.74    0.57 
   7   6   9   12.51    0.61 
   7   6   9   12.43    0.61 
  -8  -6  -9    0.00    0.10 
   8   6   9    0.06    0.12 
   8   6   9    0.03    0.12 
  -9  -6  -9    1.19    0.21 
   4  -7  -9   17.76    0.79 
   3  -7  -9    2.99    0.32 
  -3   7   9    3.03    0.28 
   2  -7  -9    1.29    0.24 
   2  -7  -9    1.69    0.24 
  -2   7   9    1.51    0.21 
   1  -7  -9   -0.03    0.11 
   1  -7  -9   -0.17    0.09 
  -1   7   9    0.04    0.10 
   0  -7  -9   17.14    0.77 
   0  -7  -9   17.08    0.72 
   0   7   9   17.27    0.72 
  -1  -7  -9    0.24    0.13 
  -1  -7  -9    0.25    0.12 
   1   7   9    0.25    0.12 
  -2  -7  -9    0.41    0.13 
  -2  -7  -9    0.42    0.13 
   2   7   9    0.36    0.13 
  -3  -7  -9   26.54    0.97 
   3   7   9   26.11    1.00 
  -4  -7  -9    0.13    0.11 
   4   7   9    0.10    0.11 
  -5  -7  -9    6.32    0.38 
   5   7   9    6.31    0.39 
  -6  -7  -9    0.11    0.11 
   6   7   9    0.09    0.11 
  -7  -7  -9    4.17    0.32 
   7   7   9    4.76    0.36 
   7   7   9    3.95    0.34 
  -8  -7  -9    0.10    0.11 
   8   7   9    0.07    0.12 
   3  -8  -9    0.17    0.13 
  -3   8   9    0.04    0.08 
   2  -8  -9    0.64    0.16 
  -2   8   9    1.01    0.19 
   1  -8  -9    0.00    0.10 
  -1   8   9   -0.10    0.08 
   0  -8  -9    5.60    0.37 
   0   8   9    5.56    0.36 
  -1  -8  -9    0.04    0.10 
   1   8   9   -0.13    0.07 
  -2  -8  -9    3.12    0.29 
   2   8   9    3.34    0.28 
  -3  -8  -9    3.23    0.30 
   3   8   9    2.83    0.25 
  -4  -8  -9    0.10    0.11 
   4   8   9   -0.08    0.07 
  -5  -8  -9   12.48    0.57 
   5   8   9   12.56    0.59 
  -6  -8  -9   14.51    0.63 
   6   8   9   14.34    0.66 
  -7  -8  -9    4.06    0.31 
   7   8   9    2.91    0.30 
   2  -9  -9    9.50    0.51 
  -2   9   9    8.68    0.49 
   1  -9  -9    2.19    0.26 
  -1   9   9    1.77    0.21 
   0  -9  -9    8.32    0.46 
   0   9   9    8.94    0.47 
  -1  -9  -9    0.64    0.16 
   1   9   9    0.47    0.13 
  -2  -9  -9    0.42    0.14 
   2   9   9    0.40    0.13 
  -3  -9  -9    2.44    0.26 
   3   9   9    1.86    0.22 
  -4  -9  -9    8.80    0.46 
   4   9   9    9.46    0.49 
  -5  -9  -9    6.91    0.40 
   5   9   9    6.96    0.42 
  -6  -9  -9    0.36    0.13 
   6   9   9    0.48    0.15 
  -7  -9  -9   12.09    0.56 
   7   9   9   11.80    0.60 
   1 -10  -9   15.37    0.69 
  -1  10   9   14.80    0.69 
   0 -10  -9    0.98    0.18 
   0  10   9    1.33    0.21 
  -1 -10  -9    3.91    0.31 
   1  10   9    3.78    0.30 
  -2 -10  -9    0.99    0.18 
   2  10   9    1.16    0.18 
  -3 -10  -9    2.19    0.24 
   3  10   9    2.26    0.26 
  -4 -10  -9    1.22    0.19 
   4  10   9    1.35    0.20 
  -5 -10  -9    0.68    0.16 
   5  10   9    0.73    0.18 
  -1 -11  -9    0.04    0.11 
   1  11   9   -0.03    0.09 
  -2 -11  -9    5.24    0.35 
   2  11   9    4.71    0.34 
  -3 -11  -9    1.06    0.18 
   3  11   9    0.96    0.18 
   0   5 -10    6.19    0.42 
  -1   5 -10    2.34    0.29 
  -2   5 -10    0.07    0.11 
  -3   5 -10    4.08    0.34 
   3  -5  10    4.11    0.35 
  -4   5 -10    0.09    0.11 
   4  -5  10    0.01    0.12 
  -5   5 -10    0.38    0.15 
   5  -5  10    0.19    0.15 
   1   4 -10    0.24    0.15 
   0   4 -10    0.21    0.13 
  -1   4 -10    9.17    0.52 
  -2   4 -10    6.56    0.43 
  -3   4 -10    0.00    0.10 
  -3   4 -10    0.02    0.10 
   3  -4  10    0.04    0.11 
  -4   4 -10    1.74    0.24 
  -4   4 -10    0.82    0.17 
   4  -4  10    1.06    0.21 
  -5   4 -10    2.78    0.30 
  -5   4 -10    2.72    0.30 
   5  -4  10    3.12    0.34 
  -6   4 -10   10.19    0.54 
  -6   4 -10    9.67    0.54 
   6  -4  10   10.25    0.58 
  -7   4 -10    0.17    0.12 
  -7   4 -10   -0.08    0.12 
   7  -4  10   -0.18    0.14 
   2   3 -10    0.04    0.13 
   1   3 -10   24.26    1.03 
   0   3 -10    1.15    0.22 
  -1   3 -10   28.61    1.13 
  -1   3 -10   28.36    1.03 
  -2   3 -10    0.64    0.15 
  -2   3 -10    0.35    0.15 
  -3   3 -10   -0.07    0.08 
  -3   3 -10    0.15    0.11 
   3  -3  10    0.07    0.12 
  -4   3 -10    0.19    0.11 
  -4   3 -10    0.20    0.13 
   4  -3  10    0.49    0.16 
  -5   3 -10   16.39    0.76 
  -5   3 -10   16.84    0.74 
   5  -3  10   17.50    0.77 
  -6   3 -10    0.82    0.18 
  -6   3 -10    1.06    0.21 
   6  -3  10    0.66    0.20 
  -7   3 -10    3.71    0.36 
  -7   3 -10    3.17    0.33 
   7  -3  10    3.26    0.38 
   3   2 -10    8.96    0.59 
   2   2 -10    2.74    0.33 
   1   2 -10   35.67    1.24 
   1   2 -10   34.55    1.37 
   0   2 -10    0.14    0.11 
   0   2 -10   -0.03    0.12 
  -1   2 -10   33.33    1.32 
  -1   2 -10   36.32    1.23 
  -2   2 -10    5.91    0.40 
  -2   2 -10    6.11    0.38 
  -3   2 -10    3.66    0.30 
  -3   2 -10    4.48    0.34 
   3  -2  10    4.17    0.34 
  -4   2 -10    0.57    0.14 
  -4   2 -10    1.00    0.20 
   4  -2  10    0.66    0.18 
  -5   2 -10    0.79    0.18 
  -5   2 -10    0.24    0.10 
   5  -2  10    0.84    0.20 
   5  -2  10    0.45    0.21 
  -6   2 -10    6.35    0.41 
  -6   2 -10    6.05    0.41 
   6  -2  10    6.27    0.45 
  -7   2 -10    9.48    0.53 
  -7   2 -10   10.56    0.55 
   7  -2  10    9.46    0.57 
  -8   2 -10    7.31    0.45 
   8  -2  10    6.86    0.50 
   3   1 -10    2.06    0.32 
   2   1 -10    3.78    0.42 
   2   1 -10    3.71    0.30 
   1   1 -10   38.38    1.29 
   1   1 -10   35.70    1.43 
   0   1 -10    1.36    0.20 
   0   1 -10    1.14    0.22 
  -1   1 -10    4.53    0.32 
  -1   1 -10    4.37    0.35 
  -2   1 -10    0.13    0.11 
  -2   1 -10    0.05    0.12 
  -3   1 -10    5.47    0.36 
  -3   1 -10    5.61    0.39 
   3  -1  10    5.86    0.39 
  -4   1 -10    3.47    0.29 
  -4   1 -10    3.56    0.30 
   4  -1  10    3.81    0.32 
  -5   1 -10    8.67    0.48 
  -5   1 -10    7.81    0.46 
   5  -1  10    9.09    0.51 
   5  -1  10    8.95    0.51 
  -6   1 -10    3.01    0.31 
  -6   1 -10    3.35    0.29 
   6  -1  10    3.61    0.37 
  -7   1 -10    6.09    0.41 
  -7   1 -10    6.03    0.40 
   7  -1  10    6.46    0.46 
  -8   1 -10   10.62    0.56 
   8  -1  10   11.32    0.64 
   3   0 -10   11.87    0.56 
   3   0 -10   12.01    0.71 
   2   0 -10    0.00    0.13 
   2   0 -10   -0.06    0.10 
   1   0 -10    2.72    0.33 
   1   0 -10    3.01    0.29 
   0   0 -10    1.93    0.26 
   0   0 -10    2.19    0.24 
  -1   0 -10    1.75    0.24 
  -1   0 -10    1.65    0.21 
  -2   0 -10    0.50    0.16 
  -2   0 -10    0.47    0.15 
   2   0  10    0.38    0.11 
  -3   0 -10    6.19    0.38 
  -3   0 -10    5.60    0.39 
   3   0  10    6.13    0.37 
   3   0  10    6.10    0.40 
  -4   0 -10    1.66    0.23 
  -4   0 -10    2.60    0.30 
   4   0  10    2.52    0.27 
   4   0  10    2.43    0.29 
  -5   0 -10    8.04    0.46 
   5   0  10    8.71    0.50 
  -6   0 -10    0.27    0.14 
  -6   0 -10    0.50    0.15 
   6   0  10    0.09    0.15 
   6   0  10    0.36    0.15 
  -7   0 -10    9.08    0.50 
  -7   0 -10    9.70    0.51 
   7   0  10    9.37    0.54 
   7   0  10    8.83    0.54 
  -8   0 -10    5.79    0.38 
   8   0  10    5.69    0.46 
   8   0  10    5.87    0.45 
   9   0  10    0.58    0.20 
   4  -1 -10    8.20    0.47 
   4  -1 -10    7.93    0.60 
   3  -1 -10    4.74    0.47 
   3  -1 -10    4.20    0.33 
   2  -1 -10    0.99    0.23 
   2  -1 -10    0.89    0.17 
   1  -1 -10    0.52    0.18 
   1  -1 -10    0.58    0.16 
   0  -1 -10    4.71    0.32 
   0  -1 -10    3.82    0.39 
  -1  -1 -10   29.64    1.03 
  -1  -1 -10   27.27    1.11 
   1   1  10   26.79    1.03 
  -2  -1 -10   13.98    0.67 
  -2  -1 -10   14.32    0.64 
   2   1  10   14.89    0.64 
  -3  -1 -10    0.73    0.16 
  -3  -1 -10    0.65    0.16 
   3   1  10    0.51    0.12 
   3   1  10    0.85    0.19 
  -4  -1 -10    3.27    0.31 
  -4  -1 -10    3.25    0.29 
   4   1  10    3.41    0.33 
   4   1  10    3.72    0.29 
  -5  -1 -10    4.25    0.34 
  -5  -1 -10    4.96    0.34 
   5   1  10    4.33    0.35 
   5   1  10    5.30    0.36 
  -6  -1 -10    0.19    0.14 
  -6  -1 -10    0.25    0.11 
   6   1  10    0.19    0.15 
  -7  -1 -10    1.76    0.26 
  -7  -1 -10    1.61    0.23 
   7   1  10    2.12    0.30 
   7   1  10    1.27    0.25 
  -8  -1 -10    2.72    0.32 
   8   1  10    2.72    0.34 
   8   1  10    2.44    0.32 
  -9  -1 -10   15.60    0.73 
   9   1  10   16.03    0.81 
   9   1  10   14.62    0.77 
   4  -2 -10    0.23    0.21 
   4  -2 -10    0.20    0.14 
   3  -2 -10    3.15    0.40 
   3  -2 -10    3.96    0.32 
   2  -2 -10   28.39    1.24 
   2  -2 -10   30.48    1.09 
   1  -2 -10   39.26    1.55 
   1  -2 -10   41.63    1.40 
   0  -2 -10    8.79    0.53 
   0  -2 -10    8.69    0.46 
   0   2  10    9.03    0.45 
  -1  -2 -10    4.25    0.32 
  -1  -2 -10    4.04    0.35 
   1   2  10    4.01    0.29 
  -2  -2 -10    8.78    0.46 
  -2  -2 -10    8.36    0.49 
   2   2  10    8.49    0.45 
  -3  -2 -10    3.19    0.32 
  -3  -2 -10    2.79    0.28 
   3   2  10    2.26    0.24 
  -4  -2 -10    0.17    0.11 
  -4  -2 -10   -0.05    0.09 
   4   2  10    0.03    0.11 
   4   2  10    0.09    0.09 
  -5  -2 -10   -0.04    0.09 
  -5  -2 -10   -0.15    0.07 
   5   2  10   -0.01    0.10 
   5   2  10   -0.12    0.10 
  -6  -2 -10    7.19    0.44 
  -6  -2 -10    7.61    0.43 
   6   2  10    7.70    0.47 
   6   2  10    7.59    0.48 
  -7  -2 -10   11.40    0.56 
  -7  -2 -10   11.62    0.59 
   7   2  10   12.11    0.63 
  -8  -2 -10    0.02    0.12 
   8   2  10    0.10    0.13 
   8   2  10    0.13    0.16 
  -9  -2 -10    9.76    0.56 
   9   2  10   10.50    0.64 
   9   2  10   10.28    0.60 
   4  -3 -10    0.75    0.18 
   4  -3 -10    0.62    0.25 
   3  -3 -10    3.57    0.35 
   3  -3 -10    3.09    0.39 
   2  -3 -10    1.06    0.20 
   2  -3 -10    1.27    0.27 
   1  -3 -10    0.60    0.16 
   1  -3 -10    0.80    0.20 
  -1   3  10    0.44    0.14 
   0  -3 -10    0.07    0.12 
   0  -3 -10    0.15    0.12 
   0   3  10   -0.03    0.08 
  -1  -3 -10   15.54    0.68 
  -1  -3 -10   16.05    0.74 
   1   3  10   15.68    0.67 
  -2  -3 -10    0.34    0.13 
  -2  -3 -10    0.18    0.11 
   2   3  10    0.19    0.12 
  -3  -3 -10    0.17    0.12 
  -3  -3 -10    0.48    0.15 
   3   3  10    0.20    0.12 
  -4  -3 -10    4.51    0.33 
  -4  -3 -10    4.29    0.33 
   4   3  10    5.09    0.34 
   4   3  10    5.09    0.38 
  -5  -3 -10    2.98    0.31 
  -5  -3 -10    1.98    0.23 
   5   3  10    2.80    0.31 
   5   3  10    2.61    0.27 
  -6  -3 -10    5.64    0.36 
  -6  -3 -10    6.18    0.40 
   6   3  10    5.47    0.40 
   6   3  10    6.28    0.42 
  -7  -3 -10    1.52    0.25 
   7   3  10    1.56    0.26 
   7   3  10    1.27    0.23 
  -8  -3 -10    1.94    0.27 
   8   3  10    1.84    0.29 
  -9  -3 -10   12.09    0.63 
   9   3  10   11.97    0.68 
   9   3  10   12.43    0.67 
   4  -4 -10    0.26    0.14 
   4  -4 -10    0.46    0.23 
   3  -4 -10    0.61    0.17 
   3  -4 -10    1.00    0.26 
   2  -4 -10    3.92    0.31 
   2  -4 -10    3.84    0.43 
   1  -4 -10   28.28    1.19 
   1  -4 -10   27.97    1.07 
  -1   4  10   29.85    1.09 
   0  -4 -10   30.77    1.10 
   0  -4 -10   29.80    1.20 
   0   4  10   28.33    1.10 
  -1  -4 -10   -0.09    0.09 
  -1  -4 -10    0.12    0.11 
   1   4  10    0.08    0.09 
  -2  -4 -10   20.22    0.88 
  -2  -4 -10   21.91    0.84 
   2   4  10   21.04    0.85 
  -3  -4 -10    1.13    0.20 
  -3  -4 -10    1.41    0.22 
   3   4  10    1.02    0.17 
  -4  -4 -10   13.61    0.62 
  -4  -4 -10   12.74    0.60 
   4   4  10   13.06    0.62 
  -5  -4 -10    1.63    0.22 
  -5  -4 -10    1.99    0.24 
   5   4  10    1.54    0.25 
   5   4  10    1.70    0.22 
  -6  -4 -10    2.01    0.25 
   6   4  10    2.52    0.30 
   6   4  10    3.35    0.34 
  -7  -4 -10   11.53    0.59 
   7   4  10   11.43    0.60 
   7   4  10   12.46    0.63 
  -8  -4 -10    8.80    0.51 
   8   4  10    9.41    0.56 
   8   4  10    8.75    0.54 
  -9  -4 -10    0.55    0.18 
   9   4  10    0.53    0.21 
   9   4  10    0.62    0.20 
   4  -5 -10    0.08    0.18 
   4  -5 -10    0.16    0.13 
   3  -5 -10    3.31    0.34 
   3  -5 -10    2.86    0.37 
   2  -5 -10   -0.09    0.13 
   2  -5 -10    0.02    0.12 
  -2   5  10    0.05    0.10 
   1  -5 -10    0.93    0.22 
   1  -5 -10    1.28    0.22 
  -1   5  10    0.87    0.16 
   0  -5 -10   11.63    0.63 
   0  -5 -10   12.38    0.58 
   0   5  10   12.60    0.58 
  -1  -5 -10    8.74    0.50 
  -1  -5 -10    9.02    0.47 
   1   5  10    9.25    0.48 
  -2  -5 -10    0.35    0.15 
  -2  -5 -10    0.72    0.17 
   2   5  10    0.63    0.14 
  -3  -5 -10   21.42    0.85 
  -3  -5 -10   20.32    0.81 
   3   5  10   19.08    0.82 
  -4  -5 -10    0.07    0.09 
  -4  -5 -10    0.36    0.15 
   4   5  10    0.31    0.13 
  -5  -5 -10   23.67    0.93 
   5   5  10   25.91    0.97 
   5   5  10   22.21    0.95 
  -6  -5 -10    0.10    0.12 
   6   5  10    0.04    0.13 
   6   5  10    0.13    0.13 
  -7  -5 -10    7.50    0.45 
   7   5  10    7.07    0.47 
   7   5  10    6.90    0.46 
  -8  -5 -10    0.34    0.15 
   8   5  10    0.68    0.19 
   8   5  10    0.40    0.17 
   3  -6 -10    1.34    0.26 
   3  -6 -10    1.27    0.22 
   2  -6 -10    0.10    0.13 
   2  -6 -10   -0.14    0.11 
  -2   6  10    0.09    0.11 
   1  -6 -10    1.81    0.29 
   1  -6 -10    1.67    0.25 
  -1   6  10    2.27    0.27 
   0  -6 -10   26.34    1.11 
   0  -6 -10   26.89    1.03 
   0   6  10   28.72    1.07 
  -1  -6 -10   46.10    1.68 
  -1  -6 -10   47.56    1.58 
   1   6  10   45.84    1.64 
  -2  -6 -10   17.11    0.74 
  -2  -6 -10   19.20    0.79 
   2   6  10   17.53    0.76 
  -3  -6 -10   41.41    1.42 
  -3  -6 -10   42.58    1.49 
   3   6  10   40.22    1.48 
  -4  -6 -10    1.51    0.23 
   4   6  10    1.50    0.22 
  -5  -6 -10    2.34    0.27 
   5   6  10    2.04    0.24 
  -6  -6 -10   19.29    0.81 
   6   6  10   20.13    0.86 
   6   6  10   19.66    0.85 
  -7  -6 -10    7.52    0.44 
   7   6  10    6.63    0.46 
   7   6  10    7.01    0.46 
  -8  -6 -10    0.83    0.18 
   8   6  10    0.80    0.20 
   8   6  10    0.89    0.22 
   3  -7 -10    0.05    0.12 
   2  -7 -10    3.95    0.37 
  -2   7  10    3.49    0.31 
   1  -7 -10    4.03    0.34 
  -1   7  10    4.83    0.35 
   0  -7 -10    2.81    0.28 
   0   7  10    2.20    0.25 
  -1  -7 -10    0.00    0.11 
   1   7  10    0.01    0.10 
  -2  -7 -10    2.21    0.26 
   2   7  10    1.67    0.23 
  -3  -7 -10    4.32    0.33 
   3   7  10    4.72    0.34 
  -4  -7 -10    3.47    0.33 
   4   7  10    3.85    0.31 
  -5  -7 -10    9.02    0.49 
   5   7  10    9.69    0.52 
  -6  -7 -10    0.17    0.12 
   6   7  10   -0.03    0.11 
  -7  -7 -10    5.21    0.37 
   7   7  10    4.80    0.39 
   7   7  10    5.14    0.39 
   2  -8 -10    0.47    0.17 
  -2   8  10    0.06    0.12 
   1  -8 -10    4.25    0.39 
  -1   8  10    3.89    0.33 
   0  -8 -10    0.74    0.18 
   0   8  10    0.60    0.17 
  -1  -8 -10   -0.05    0.11 
   1   8  10    0.01    0.10 
  -2  -8 -10    4.30    0.33 
   2   8  10    4.60    0.34 
  -3  -8 -10   14.01    0.63 
   3   8  10   13.69    0.64 
  -4  -8 -10   24.25    0.97 
   4   8  10   26.76    1.03 
  -5  -8 -10   21.23    0.85 
   5   8  10   21.16    0.89 
  -6  -8 -10    0.23    0.13 
   6   8  10   -0.02    0.11 
  -7  -8 -10    0.90    0.19 
   7   8  10    1.41    0.25 
   1  -9 -10   -0.08    0.12 
  -1   9  10   -0.16    0.09 
   0  -9 -10    3.75    0.35 
   0   9  10    3.46    0.31 
  -1  -9 -10    0.07    0.11 
   1   9  10    0.28    0.12 
  -2  -9 -10    1.26    0.21 
   2   9  10    1.64    0.23 
  -3  -9 -10    3.37    0.33 
   3   9  10    3.00    0.31 
  -4  -9 -10    1.51    0.22 
   4   9  10    1.73    0.25 
  -5  -9 -10    7.22    0.42 
   5   9  10    6.26    0.42 
  -6  -9 -10    0.83    0.18 
   6   9  10    0.82    0.19 
   0 -10 -10    1.67    0.25 
   0  10  10    1.58    0.24 
  -1 -10 -10    6.29    0.41 
   1  10  10    6.24    0.41 
  -2 -10 -10   12.37    0.60 
   2  10  10   12.69    0.62 
  -3 -10 -10    6.33    0.40 
   3  10  10    5.93    0.40 
  -4 -10 -10    0.95    0.19 
   4  10  10    1.33    0.22 
  -2   4 -11    1.76    0.26 
  -3   4 -11   14.49    0.71 
  -4   4 -11    2.99    0.35 
   4  -4  11    3.41    0.36 
   0   3 -11    0.76    0.20 
  -1   3 -11    2.96    0.33 
  -2   3 -11    6.09    0.43 
  -3   3 -11   11.67    0.57 
  -3   3 -11   11.00    0.60 
  -4   3 -11    7.38    0.47 
  -4   3 -11    7.83    0.47 
   4  -3  11    7.00    0.48 
  -5   3 -11    7.11    0.46 
  -5   3 -11    7.18    0.46 
   5  -3  11    6.99    0.48 
  -6   3 -11   10.15    0.56 
  -6   3 -11   10.01    0.57 
   6  -3  11   10.05    0.60 
   1   2 -11    0.43    0.18 
   0   2 -11    8.34    0.53 
  -1   2 -11    6.31    0.39 
  -1   2 -11    5.58    0.43 
  -2   2 -11    4.16    0.33 
  -2   2 -11    4.54    0.37 
  -3   2 -11    0.73    0.17 
  -3   2 -11    0.93    0.20 
  -4   2 -11    1.68    0.26 
  -4   2 -11    1.79    0.24 
   4  -2  11    1.85    0.28 
  -5   2 -11    4.93    0.38 
  -5   2 -11    5.14    0.38 
   5  -2  11    5.31    0.41 
  -6   2 -11    0.70    0.18 
  -6   2 -11    0.56    0.16 
   6  -2  11    0.40    0.16 
  -7   2 -11    1.78    0.26 
  -7   2 -11    1.28    0.23 
   7  -2  11    1.63    0.28 
   1   1 -11    0.65    0.19 
   0   1 -11   10.04    0.51 
   0   1 -11   10.12    0.59 
  -1   1 -11    0.76    0.19 
  -1   1 -11    0.64    0.16 
  -2   1 -11    1.06    0.20 
  -2   1 -11    1.27    0.22 
  -3   1 -11   21.83    0.87 
  -3   1 -11   20.39    0.91 
  -4   1 -11    7.26    0.44 
  -4   1 -11    7.09    0.45 
   4  -1  11    6.64    0.46 
  -5   1 -11    0.47    0.16 
  -5   1 -11    0.51    0.15 
   5  -1  11    0.57    0.18 
  -6   1 -11    1.90    0.25 
  -6   1 -11    1.92    0.29 
   6  -1  11    2.19    0.30 
  -7   1 -11    0.80    0.20 
  -7   1 -11    0.78    0.20 
   7  -1  11    0.86    0.22 
   2   0 -11    3.61    0.40 
   2   0 -11    3.47    0.35 
   1   0 -11    0.09    0.14 
   1   0 -11   -0.01    0.12 
   0   0 -11    5.28    0.37 
   0   0 -11    5.42    0.42 
  -1   0 -11    2.02    0.25 
  -1   0 -11    2.56    0.32 
  -2   0 -11   20.86    0.91 
  -2   0 -11   20.77    0.84 
  -3   0 -11    2.61    0.32 
  -3   0 -11    2.38    0.28 
  -4   0 -11    0.92    0.17 
  -4   0 -11    1.37    0.22 
   4   0  11    1.56    0.26 
  -5   0 -11    0.71    0.18 
  -5   0 -11    1.02    0.21 
   5   0  11    1.44    0.25 
  -6   0 -11    2.05    0.27 
  -6   0 -11    1.81    0.24 
   6   0  11    2.08    0.31 
  -7   0 -11   11.66    0.60 
  -7   0 -11   10.99    0.60 
   7   0  11   11.94    0.66 
  -8   0 -11    4.56    0.39 
   8   0  11    5.07    0.49 
   2  -1 -11   11.50    0.69 
   2  -1 -11   10.97    0.56 
   1  -1 -11    0.06    0.13 
   1  -1 -11    0.23    0.13 
   0  -1 -11   13.72    0.71 
   0  -1 -11   13.24    0.62 
  -1  -1 -11    8.58    0.47 
  -1  -1 -11    7.52    0.50 
  -2  -1 -11    0.36    0.14 
  -2  -1 -11    0.37    0.15 
  -3  -1 -11    0.88    0.19 
  -3  -1 -11    0.87    0.18 
   3   1  11    0.68    0.16 
  -4  -1 -11    1.27    0.21 
  -4  -1 -11    1.06    0.18 
   4   1  11    1.70    0.27 
   4   1  11    1.19    0.19 
  -5  -1 -11   53.83    1.95 
  -5  -1 -11   56.26    1.88 
   5   1  11   57.44    1.92 
   5   1  11   55.21    1.96 
  -6  -1 -11    2.49    0.32 
  -6  -1 -11    3.48    0.30 
   6   1  11    2.49    0.32 
  -7  -1 -11   22.95    0.95 
  -7  -1 -11   22.16    0.94 
   7   1  11   21.44    0.97 
   7   1  11   23.44    0.99 
  -8  -1 -11   10.11    0.58 
   8   1  11   10.56    0.63 
   8   1  11   10.89    0.64 
   2  -2 -11   -0.01    0.16 
   2  -2 -11    0.62    0.18 
   1  -2 -11    0.71    0.23 
   1  -2 -11    0.72    0.18 
   0  -2 -11    0.46    0.16 
   0  -2 -11    0.28    0.17 
  -1  -2 -11    0.13    0.14 
  -1  -2 -11    0.36    0.14 
  -2  -2 -11    4.05    0.33 
  -2  -2 -11    4.16    0.36 
   2   2  11    4.76    0.33 
  -3  -2 -11   13.72    0.64 
  -3  -2 -11   12.06    0.64 
   3   2  11   13.42    0.63 
  -4  -2 -11    0.53    0.16 
  -4  -2 -11    0.88    0.20 
   4   2  11    0.76    0.18 
   4   2  11    0.77    0.19 
  -5  -2 -11    9.34    0.51 
  -5  -2 -11    9.19    0.51 
   5   2  11    9.48    0.55 
   5   2  11    9.67    0.53 
  -6  -2 -11    1.24    0.20 
  -6  -2 -11    1.06    0.21 
   6   2  11    1.56    0.27 
   6   2  11    1.69    0.26 
  -7  -2 -11    2.30    0.30 
   7   2  11    1.72    0.28 
  -8  -2 -11    0.35    0.17 
   8   2  11    0.83    0.22 
   8   2  11    0.59    0.18 
   2  -3 -11   24.32    0.96 
   2  -3 -11   23.84    1.11 
   1  -3 -11   10.77    0.56 
   1  -3 -11   10.53    0.64 
   0  -3 -11    5.91    0.39 
   0  -3 -11    6.50    0.47 
  -1  -3 -11    1.35    0.24 
  -1  -3 -11    1.27    0.22 
   1   3  11    1.05    0.17 
  -2  -3 -11    2.79    0.30 
  -2  -3 -11    3.66    0.31 
   2   3  11    3.90    0.31 
  -3  -3 -11    4.02    0.39 
  -3  -3 -11    4.29    0.38 
   3   3  11    4.21    0.32 
  -4  -3 -11    0.16    0.12 
  -4  -3 -11    0.18    0.11 
   4   3  11    0.24    0.13 
  -5  -3 -11   21.66    0.88 
  -5  -3 -11   20.93    0.87 
   5   3  11   20.09    0.88 
   5   3  11   19.96    0.89 
  -6  -3 -11    0.35    0.14 
  -6  -3 -11    0.34    0.17 
   6   3  11    0.43    0.19 
   6   3  11    0.56    0.17 
  -7  -3 -11   30.94    1.18 
   7   3  11   30.48    1.21 
   7   3  11   31.11    1.25 
  -8  -3 -11    4.51    0.41 
   8   3  11    3.23    0.37 
   2  -4 -11   10.15    0.55 
   2  -4 -11   10.63    0.67 
   1  -4 -11    0.03    0.12 
   1  -4 -11   -0.10    0.11 
   0  -4 -11    3.43    0.34 
   0  -4 -11    2.30    0.30 
   0   4  11    3.21    0.32 
  -1  -4 -11    9.45    0.51 
  -1  -4 -11    9.51    0.55 
   1   4  11    8.26    0.47 
  -2  -4 -11    0.97    0.20 
  -2  -4 -11    0.70    0.18 
   2   4  11    0.58    0.14 
  -3  -4 -11    0.09    0.12 
  -3  -4 -11    0.12    0.11 
   3   4  11    0.00    0.10 
  -4  -4 -11    4.62    0.35 
  -4  -4 -11    4.69    0.36 
   4   4  11    4.70    0.36 
  -5  -4 -11    7.72    0.45 
  -5  -4 -11    7.62    0.46 
   5   4  11    7.61    0.48 
   5   4  11    7.92    0.48 
  -6  -4 -11    5.08    0.39 
   6   4  11    6.58    0.44 
   6   4  11    5.67    0.41 
  -7  -4 -11   10.30    0.58 
   7   4  11   11.27    0.63 
   7   4  11   12.02    0.64 
  -8  -4 -11    0.57    0.19 
   8   4  11    0.44    0.20 
   8   4  11    0.59    0.20 
   2  -5 -11   26.78    1.04 
   2  -5 -11   25.32    1.17 
   1  -5 -11    0.30    0.15 
   1  -5 -11    0.27    0.15 
   0  -5 -11    0.26    0.14 
   0  -5 -11    0.55    0.18 
   0   5  11    0.55    0.15 
  -1  -5 -11    0.07    0.12 
  -1  -5 -11    0.08    0.11 
   1   5  11    0.25    0.12 
  -2  -5 -11    3.62    0.32 
  -2  -5 -11    2.55    0.29 
   2   5  11    3.32    0.29 
  -3  -5 -11    1.41    0.22 
  -3  -5 -11    1.44    0.22 
   3   5  11    1.03    0.18 
  -4  -5 -11    1.57    0.24 
   4   5  11    2.01    0.27 
  -5  -5 -11   -0.06    0.11 
   5   5  11    0.05    0.10 
  -6  -5 -11    2.68    0.30 
   6   5  11    3.24    0.36 
   6   5  11    3.00    0.31 
  -7  -5 -11   29.54    1.14 
   7   5  11   28.72    1.21 
   7   5  11   31.82    1.20 
  -8  -5 -11   19.57    0.89 
   8   5  11   21.17    0.96 
   8   5  11   21.89    0.95 
   2  -6 -11   -0.07    0.13 
   1  -6 -11    2.22    0.29 
   1  -6 -11    1.76    0.32 
  -1   6  11    2.36    0.28 
   0  -6 -11   -0.01    0.12 
   0  -6 -11   -0.03    0.11 
   0   6  11    0.17    0.12 
  -1  -6 -11    0.53    0.18 
  -1  -6 -11   -0.01    0.12 
   1   6  11    0.15    0.11 
  -2  -6 -11    0.09    0.13 
   2   6  11    0.18    0.12 
  -3  -6 -11    3.07    0.31 
   3   6  11    3.27    0.30 
  -4  -6 -11   24.48    0.97 
   4   6  11   24.16    0.99 
  -5  -6 -11   16.21    0.73 
   5   6  11   16.24    0.75 
  -6  -6 -11    7.51    0.47 
   6   6  11    7.66    0.48 
  -7  -6 -11    0.24    0.13 
   7   6  11    0.10    0.13 
   7   6  11    0.11    0.15 
   1  -7 -11    3.29    0.35 
  -1   7  11    3.69    0.34 
   0  -7 -11   10.09    0.54 
   0   7  11    9.07    0.52 
  -1  -7 -11    0.41    0.16 
   1   7  11    0.27    0.13 
  -2  -7 -11    0.00    0.11 
   2   7  11    0.00    0.10 
  -3  -7 -11    0.47    0.16 
   3   7  11    0.81    0.17 
  -4  -7 -11    0.44    0.16 
   4   7  11    0.34    0.15 
  -5  -7 -11    0.63    0.18 
   5   7  11    0.26    0.15 
  -6  -7 -11    0.56    0.17 
   6   7  11    0.42    0.16 
  -7  -7 -11    0.24    0.14 
   7   7  11   -0.23    0.11 
   0  -8 -11    7.20    0.46 
   0   8  11    6.83    0.45 
  -1  -8 -11   20.11    0.85 
   1   8  11   19.79    0.86 
  -2  -8 -11    1.05    0.22 
   2   8  11    0.99    0.19 
  -3  -8 -11    6.33    0.41 
   3   8  11    5.64    0.40 
  -4  -8 -11   -0.12    0.11 
   4   8  11    0.03    0.10 
  -5  -8 -11    3.08    0.32 
   5   8  11    3.07    0.32 
  -6  -8 -11   19.03    0.80 
   6   8  11   17.58    0.83 
  -1  -9 -11    1.77    0.26 
   1   9  11    1.75    0.26 
  -2  -9 -11    8.46    0.50 
   2   9  11    8.95    0.51 
  -3  -9 -11    0.11    0.13 
   3   9  11   -0.09    0.10 
  -4  -9 -11    1.88    0.25 
   4   9  11    1.96    0.25 
  -2   2 -12    1.80    0.28 
  -3   2 -12    0.62    0.19 
  -3   2 -12    0.19    0.15 
  -4   2 -12    2.52    0.31 
  -4   2 -12    2.71    0.34 
   4  -2  12    2.86    0.35 
  -1   1 -12   15.14    0.77 
  -1   1 -12   15.12    0.70 
  -2   1 -12    4.94    0.38 
  -2   1 -12    5.67    0.44 
  -3   1 -12    4.97    0.40 
  -3   1 -12    4.88    0.38 
  -4   1 -12    7.06    0.45 
  -4   1 -12    6.70    0.46 
   4  -1  12    6.99    0.48 
  -5   1 -12   -0.07    0.12 
  -5   1 -12   -0.19    0.08 
   5  -1  12    0.24    0.17 
  -6   1 -12    0.11    0.14 
  -6   1 -12    0.00    0.10 
   6  -1  12    0.13    0.17 
   0   0 -12    2.49    0.32 
   0   0 -12    2.76    0.30 
  -1   0 -12    6.36    0.48 
  -1   0 -12    6.89    0.44 
  -2   0 -12    2.75    0.32 
  -2   0 -12    3.63    0.35 
  -3   0 -12   18.52    0.82 
  -3   0 -12   19.34    0.88 
  -4   0 -12    5.23    0.40 
  -4   0 -12    5.77    0.42 
  -5   0 -12    0.27    0.14 
  -5   0 -12   -0.10    0.11 
   5   0  12    0.51    0.20 
  -6   0 -12    0.19    0.14 
  -6   0 -12    0.01    0.10 
   6   0  12    0.04    0.14 
   0  -1 -12   12.49    0.62 
   0  -1 -12   12.45    0.71 
  -1  -1 -12   10.99    0.63 
  -1  -1 -12   10.21    0.56 
  -2  -1 -12   -0.08    0.12 
  -2  -1 -12    0.01    0.13 
  -3  -1 -12    1.58    0.26 
  -3  -1 -12    1.18    0.22 
  -4  -1 -12   -0.03    0.10 
  -4  -1 -12    0.07    0.14 
  -5  -1 -12    7.49    0.48 
  -5  -1 -12    7.83    0.49 
   5   1  12    8.05    0.53 
  -6  -1 -12    1.02    0.18 
  -6  -1 -12    1.05    0.21 
   6   1  12    0.99    0.24 
  -7  -1 -12    0.02    0.13 
   7   1  12    0.03    0.16 
   1  -2 -12   -0.15    0.13 
   1  -2 -12    0.06    0.13 
   0  -2 -12    0.17    0.15 
   0  -2 -12    0.13    0.14 
  -1  -2 -12    0.32    0.15 
  -1  -2 -12    0.29    0.16 
  -2  -2 -12    0.24    0.13 
  -2  -2 -12    0.18    0.14 
  -3  -2 -12    0.33    0.16 
  -3  -2 -12    0.19    0.14 
  -4  -2 -12    0.20    0.15 
  -4  -2 -12    0.22    0.13 
  -5  -2 -12   19.03    0.82 
  -5  -2 -12   17.03    0.81 
   5   2  12   17.55    0.84 
  -6  -2 -12    1.46    0.26 
  -6  -2 -12    1.19    0.19 
   6   2  12    1.47    0.29 
  -7  -2 -12    0.20    0.16 
   7   2  12    0.15    0.17 
   1  -3 -12    8.45    0.51 
   1  -3 -12    7.93    0.57 
   0  -3 -12    0.63    0.19 
   0  -3 -12    0.63    0.22 
  -1  -3 -12    3.91    0.41 
  -1  -3 -12    2.99    0.33 
  -2  -3 -12    7.57    0.48 
  -2  -3 -12    8.73    0.53 
  -3  -3 -12   16.99    0.83 
  -3  -3 -12   19.22    0.82 
   3   3  12   18.54    0.85 
  -4  -3 -12    4.47    0.43 
  -4  -3 -12    4.01    0.39 
   4   3  12    3.89    0.39 
  -5  -3 -12    1.72    0.23 
  -5  -3 -12    2.26    0.29 
   5   3  12    1.51    0.23 
   5   3  12    2.02    0.30 
  -6  -3 -12    2.02    0.30 
   6   3  12    2.21    0.33 
   6   3  12    1.55    0.25 
  -7  -3 -12    1.18    0.24 
   7   3  12    0.38    0.21 
   7   3  12    0.89    0.22 
   1  -4 -12    0.21    0.18 
   1  -4 -12    0.52    0.19 
   0  -4 -12    1.19    0.24 
   0  -4 -12    1.45    0.25 
  -1  -4 -12    0.85    0.19 
  -1  -4 -12    1.15    0.22 
  -2  -4 -12    1.07    0.20 
  -2  -4 -12    1.24    0.24 
   2   4  12    0.91    0.20 
  -3  -4 -12   15.64    0.76 
  -3  -4 -12   14.68    0.71 
   3   4  12   15.73    0.73 
  -4  -4 -12   10.24    0.56 
  -4  -4 -12    9.57    0.55 
   4   4  12    9.05    0.53 
  -5  -4 -12    2.36    0.31 
   5   4  12    2.62    0.33 
  -6  -4 -12    2.37    0.30 
   6   4  12    3.40    0.39 
   6   4  12    3.48    0.38 
  -7  -4 -12    3.48    0.37 
   7   4  12    4.20    0.44 
   7   4  12    3.51    0.37 
   0  -5 -12    1.77    0.26 
   0  -5 -12    1.72    0.29 
  -1  -5 -12    1.73    0.26 
  -1  -5 -12    1.83    0.26 
   1   5  12    1.27    0.22 
  -2  -5 -12    2.56    0.31 
  -2  -5 -12    1.82    0.25 
   2   5  12    2.13    0.26 
  -3  -5 -12    1.45    0.25 
   3   5  12    1.51    0.22 
  -4  -5 -12    0.03    0.14 
   4   5  12   -0.02    0.13 
  -5  -5 -12    8.15    0.51 
   5   5  12    8.60    0.52 
  -6  -5 -12    1.83    0.28 
   6   5  12    1.01    0.22 
   0  -6 -12    7.77    0.50 
  -1  -6 -12    2.03    0.28 
   1   6  12    1.78    0.26 
  -2  -6 -12   -0.08    0.12 
   2   6  12    0.10    0.12 
  -3  -6 -12    0.43    0.17 
   3   6  12    0.46    0.16 
  -4  -6 -12    3.96    0.38 
   4   6  12    3.05    0.32 
  -5  -6 -12    9.64    0.56 
   5   6  12   10.77    0.59 
  -6  -6 -12    4.99    0.40 
   6   6  12    4.45    0.40 
  -1  -7 -12    2.76    0.32 
   1   7  12    2.44    0.29 
  -2  -7 -12    1.39    0.25 
   2   7  12    1.46    0.25 
  -3  -7 -12    0.94    0.20 
   3   7  12    0.95    0.21 
  -4  -7 -12    6.84    0.47 
   4   7  12    7.76    0.49 
  -5  -7 -12    2.39    0.30 
   5   7  12    2.10    0.29 
  -2  -2 -13    6.19    0.48 
  -2  -2 -13    5.94    0.43 
  -3  -2 -13    0.66    0.21 
  -3  -2 -13    0.55    0.18 
  -4  -2 -13   -0.06    0.11 
  -4  -2 -13   -0.01    0.13 
  -2  -3 -13    2.32    0.34 
  -2  -3 -13    1.67    0.26 
  -3  -3 -13    0.13    0.15 
  -3  -3 -13    0.16    0.16 
  -4  -3 -13    1.33    0.25 
  -4  -3 -13    1.25    0.24 
  -5  -3 -13    0.08    0.16 
  -2  -4 -13    0.81    0.21 
  -2  -4 -13    1.21    0.24 
  -3  -4 -13    3.17    0.35 
  -4  -4 -13    2.22    0.31 
  -3  -5 -13    0.00    0.13 
   0   0   0    0.00    0.00 
; 
_shelx_hkl_checksum   90833 
  
